# Supplementary material for: Using in silico tools to predict flame retardant metabolites for more informative exposomics-based approaches
Source: Front Toxicol. 2023 Oct 16;5:1216802. doi: 10.3389/ftox.2023.1216802 (PMC10613991; doi:10.3389/ftox.2023.1216802)
Supplement: Supplementary file 1 [file Table2.XLSX]

## Sheet: Sheet1
Unique Classes	Number of Metabolites	%
1	6429	0.9925
2	29	0.0044
3	10	0.0015
4	5	0.0007
5	3	0.0004
6	0	0
7	1	0.0002
