# Supplementary material for: Using in silico tools to predict flame retardant metabolites for more informative exposomics-based approaches
Source: Front Toxicol. 2023 Oct 16;5:1216802. doi: 10.3389/ftox.2023.1216802 (PMC10613991; doi:10.3389/ftox.2023.1216802)
Supplement: Supplementary file 2 [file Table3.XLSX]

## Sheet: Sheet1
Class	Total Compounds	GI Absorption				BBB Permeant
		Low	%	High	%	No	%	Yes	%
nonhalogenated	97	33	0.34	64	0.66	68	0.7	29	0.3
polyhalogenated alicycles	10	10	1	0	0	10	1	0	0
polyhalogenated aliphatic carboxylate	3	0	0	3	1	0	0	3	1
polyhalogenated aliphatic chains	15	10	0.67	5	0.33	7	0.47	8	0.53
polyhalogenated benzene alicycles	3	3	1	0	0	3	1	0	0
polyhalogenated benzene aliphatics and functionalized	19	16	0.84	3	0.16	15	0.79	4	0.21
polyhalogenated benzenes	48	46	0.96	2	0.04	42	0.88	6	0.13
polyhalogenated bisphenol aliphatics and functionalized	14	8	0.57	6	0.43	13	0.93	1	0.07
polyhalogenated carbocycles	16	10	0.63	6	0.38	12	0.75	4	0.25
polyhalogenated diphenyl ethers	221	203	0.92	18	0.08	204	0.92	17	0.08
polyhalogenated organophosphates	37	10	0.27	27	0.73	16	0.43	21	0.57
polyhalogenated phenol derivatives	8	1	0.13	7	0.88	2	0.25	6	0.75
polyhalogenated phenol-aliphatic ether	11	4	0.36	7	0.64	6	0.55	5	0.45
polyhalogenated phthalates/benzoates/imides	17	7	0.41	10	0.59	9	0.53	8	0.47
polyhalogenated triazines	6	1	0.17	5	0.83	3	0.5	3	0.5
