# Supplementary material for: Using in silico tools to predict flame retardant metabolites for more informative exposomics-based approaches
Source: Front Toxicol. 2023 Oct 16;5:1216802. doi: 10.3389/ftox.2023.1216802 (PMC10613991; doi:10.3389/ftox.2023.1216802)
Supplement: Supplementary file 4 [file Table4.XLSX]

## Sheet: All
Compound_Type	CASRN	INCHIKEY	HMDB_ID	Experimental Spectra	Predicted Spectra	Class
Parent_FR	83-86-3		HMDB0003502	MS/MS	GC-MS, LC-MS/MS, 1D NMR	Nonhal
Parent_FR	598-02-7	UCQFCFPECQILOL-UHFFFAOYSA-N	HMDB0012209	LC-MS/MS	GC-MS, LC-MS/MS, 1D NMR, IR	Nonhal
Parent_FR		DBVJJBKOTRCVKF-UHFFFAOYSA-N	HMDB0015210	MS/MS	GC-MS, LC-MS/MS, 1D NMR, IR	Nonhal
Parent_FR	123-77-3		HMDB0029616	GC-MS	GC-MS, LC-MS/MS, IR	Nonhal
Parent_FR	118-79-6	BSWWXRFVMJHFBN-UHFFFAOYSA-N	HMDB0029642	GC-MS, LC-MS/MS	GC-MS, LC-MS/MS	Nonhal
Parent_FR	615-58-7	FAXWFCTVSHEODL-UHFFFAOYSA-N	HMDB0032079	LC-MS/MS	GC-MS, LC-MS/MS	polyhalogenated phenol derivatives
Parent_FR	608-33-3	SSIZLKDLDKIHEV-UHFFFAOYSA-N	HMDB0032080	None	GC-MS, LC-MS/MS	polyhalogenated phenol derivatives
Parent_FR		OJMHGSMSQZEBFH-UHFFFAOYSA-N	HMDB0037515	None	GC-MS, LC-MS/MS
Parent_FR		WHPVYXDFIXRKLN-UHFFFAOYSA-N	HMDB0037516	None	None
Parent_FR		ARERIMFZYPFJAV-UHFFFAOYSA-N	HMDB0037520	None	GC-MS, LC-MS/MS
Parent_FR	68631-49-2	RZXIRSKYBISPGF-UHFFFAOYSA-N	HMDB0037525	None	GC-MS, LC-MS/MS
Parent_FR	207122-15-4	VHNPZYZQKWIWOD-UHFFFAOYSA-N	HMDB0037526	None	GC-MS, LC-MS/MS
Parent_FR	189084-64-8	NSKIRYMHNFTRLR-UHFFFAOYSA-N	HMDB0037532	None	GC-MS, LC-MS/MS
Parent_FR	41318-75-6	UPNBETHEXPIWQX-UHFFFAOYSA-N	HMDB0037545	None	GC-MS, LC-MS/MS
Parent_FR	207122-16-5	ILPSCQCLBHQUEM-UHFFFAOYSA-N	HMDB0037546	None	GC-MS, LC-MS/MS
Parent_FR	5436-43-1	XYBSIYMGXVUVGY-UHFFFAOYSA-N	HMDB0037547	None	GC-MS, LC-MS/MS
Parent_FR	108-80-5	ZFSLODLOARCGLH-UHFFFAOYSA-N	HMDB0041861	GC-MS	GC-MS, MS, LC-MS/MS, IR
Parent_FR		GVYLCNUFSHDAAW-UHFFFAOYSA-N	HMDB0059573	None	GC-MS, MS, LC-MS/MS
Parent_FR		KKUKTXOBAWVSHC-UHFFFAOYSA-N	HMDB0061734	None	GC-MS, LC-MS/MS, 1D NMR, IR
Parent_FR	2234-13-1	RTNLUFLDZOAXIC-UHFFFAOYSA-N	HMDB0062244	None	GC-MS, LC-MS/MS
Parent_FR	115-77-5	WXZMFSXDPGVJKK-UHFFFAOYSA-N	HMDB0062269	None	GC-MS, LC-MS/MS, 1D NMR, IR
Metab		QTBSBXVTEAMEQO-UHFFFAOYSA-N	HMDB0000042	GC-MS, LC-MS/MS, 1D NMR	GC-MS, LC-MS/MS, 1D NMR, IR
Metab		LFQSCWFLJHTTHZ-UHFFFAOYSA-N	HMDB0000108	GC-MS, LC-MS/MS, 1D NMR, 2D NMR	GC-MS, LC-MS/MS, 1D NMR, IR
Metab		BDAGIHXWWSANSR-UHFFFAOYSA-N	HMDB0000142	LC-MS/MS, 1D NMR, 2D NMR	GC-MS, LC-MS/MS, 1D NMR, IR
Metab		ISWSIDIOOBJBQZ-UHFFFAOYSA-N	HMDB0000228	GC-MS, LC-MS/MS, 1D NMR, 2D NMR	GC-MS, LC-MS/MS, IR
Metab		XBDQKXXYIPTUBI-UHFFFAOYSA-N	HMDB0000237	GC-MS, LC-MS/MS, 1D NMR, 2D NMR, MS	GC-MS, LC-MS/MS, IR
Metab		XSQUKJJJFZCRTK-UHFFFAOYSA-N	HMDB0000294	GC-MS, LC-MS/MS, 1D NMR	GC-MS, LC-MS/MS, IR
Metab		DZAIOXUZHHTJKN-UHFFFAOYSA-N	HMDB0000337	GC-MS	GC-MS, LC-MS/MS, 1D NMR, IR
Metab		BDERNNFJNOPAEC-UHFFFAOYSA-N	HMDB0000820	GC-MS, LC-MS/MS, 1D NMR	GC-MS, LC-MS/MS, IR
Metab		KFZMGEQAYNKOFK-UHFFFAOYSA-N	HMDB0000863	GC-MS, LC-MS/MS, 1D NMR, 2D NMR	GC-MS, LC-MS/MS, IR
Metab		UKISAGFGRDHYFO-UHFFFAOYSA-N	HMDB0000894	LC-MS/MS, 1D NMR	GC-MS, LC-MS/MS, 1D NMR, IR
Metab		IKHGUXGNUITLKF-UHFFFAOYSA-N	HMDB0000990	LC-MS/MS	GC-MS, MS, LC-MS/MS, 1D NMR, IR	Acetaldehyde
Metab		NUJGJRNETVAIRJ-UHFFFAOYSA-N	HMDB0001140	GC-MS, LC-MS/MS, 1D NMR, 2D NMR	GC-MS, LC-MS/MS, IR, MS
Metab		KBPLFHHGFOOTCA-UHFFFAOYSA-N	HMDB0001183	GC-MS, LC-MS/MS, 1D NMR, 2D NMR	GC-MS, LC-MS/MS, 1D NMR, 2D NMR, IR, MS
Metab		WSFSSNUMVMOOMR-UHFFFAOYSA-N	HMDB0001426	None	GC-MS, MS
Metab		ZHNUHDYFZUAESO-UHFFFAOYSA-N	HMDB0001536	None	GC-MS, LC-MS/MS, 1D NMR, IR
Metab		CSCPPACGZOOCGX-UHFFFAOYSA-N	HMDB0001659	GC-MS, LC-MS/MS, 1D NMR, 2D NMR	GC-MS, LC-MS/MS, 1D NMR, IR, MS
Metab		IWDCLRJOBJJRNH-UHFFFAOYSA-N	HMDB0001858	GC-MS, LC-MS/MS, 1D NMR, 2D NMR	GC-MS, LC-MS/MS, IR, MS
Metab		WPYMKLBDIGXBTP-UHFFFAOYSA-N	HMDB0001870	GC-MS, LC-MS/MS, 1D NMR, 2D NMR	GC-MS, LC-MS/MS, IR, MS
Metab		OKKJLVBELUTLKV-UHFFFAOYSA-N	HMDB0001875	GC-MS, LC-MS/MS, 1D NMR, 2D NMR	GC-MS, LC-MS/MS, 1D NMR, IR, MS
Metab		DNIAPMSPPWPWGF-UHFFFAOYSA-N	HMDB0001881	GC-MS, LC-MS/MS, 1D NMR, 2D NMR	GC-MS, LC-MS/MS, 1D NMR, IR, MS
Metab		RLSSMJSEOOYNOY-UHFFFAOYSA-N	HMDB0002048	GC-MS, LC-MS/MS, 1D NMR, 2D NMR	GC-MS, LC-MS/MS, 1D NMR, IR, MS
Metab		QWVGKYWNOKOFNN-UHFFFAOYSA-N	HMDB0002055	GC-MS, LC-MS/MS, 1D NMR, 2D NMR	GC-MS, LC-MS/MS, 1D NMR, IR, MS
Metab		NBIIXXVUZAFLBC-UHFFFAOYSA-N	HMDB0002142	GC-MS, LC-MS/MS	GC-MS, LC-MS/MS, IR
Metab		WGCNASOHLSPBMP-UHFFFAOYSA-N	HMDB0003344	LC-MS/MS	GC-MS, LC-MS/MS, 1D NMR, IR
Metab		NBBJYMSMWIIQGU-UHFFFAOYSA-N	HMDB0003366	GC-MS, LC-MS/MS, 1D NMR, 2D NMR	GC-MS, LC-MS/MS, IR
Metab		ZTQSAGDEMFDKMZ-UHFFFAOYSA-N	HMDB0003543	GC-MS, LC-MS/MS, 1D NMR, 2D NMR	GC-MS, LC-MS/MS, 1D NMR, IR
Metab		FUGYGGDSWSUORM-UHFFFAOYSA-N	HMDB0004072	GC-MS, LC-MS/MS	GC-MS, LC-MS/MS, 1D NMR, IR
Metab		LRHPLDYGYMQRHN-UHFFFAOYSA-N	HMDB0004327	GC-MS, LC-MS/MS, 1D NMR, 2D NMR	GC-MS, LC-MS/MS, IR
Metab		ZBCBWPMODOFKDW-UHFFFAOYSA-N	HMDB0004437	GC-MS, LC-MS/MS, 1D NMR, 2D NMR	GC-MS, LC-MS/MS, 1D NMR, IR
Metab		HFZWRUODUSTPEG-UHFFFAOYSA-N	HMDB0004811	GC-MS, LC-MS/MS, 1D NMR, 2D NMR	GC-MS, LC-MS/MS, 1D NMR, IR, MS
Metab		ZXEKIIBDNHEJCQ-UHFFFAOYSA-N	HMDB0006006	GC-MS	GC-MS, LC-MS/MS, 1D NMR, IR
Metab		PHTQWCKDNZKARW-UHFFFAOYSA-N	HMDB0006007	GC-MS, LC-MS/MS	GC-MS, LC-MS/MS, 1D NMR, IR
Metab		HUMNYLRZRPPJDN-UHFFFAOYSA-N	HMDB0006115	GC-MS, LC-MS/MS, 1D NMR, 2D NMR	GC-MS, LC-MS/MS, 1D NMR, IR
Metab		YGHRJJRRZDOVPD-UHFFFAOYSA-N	HMDB0006478	GC-MS, LC-MS/MS, 1D NMR, 2D NMR	GC-MS, LC-MS/MS, 1D NMR, IR
Metab		UCQFCFPECQILOL-UHFFFAOYSA-N	HMDB0012209	LC-MS/MS	GC-MS, LC-MS/MS, 1D NMR, IR
Metab		ZJXZSIYSNXKHEA-UHFFFAOYSA-N	HMDB0012228	None	GC-MS, LC-MS/MS, 1D NMR, IR
Metab		ZSIAUFGUXNUGDI-UHFFFAOYSA-N	HMDB0012971	GC-MS, LC-MS/MS	GC-MS, MS, 1D NMR, IR
Metab		AMQJEAYHLZJPGS-UHFFFAOYSA-N	HMDB0013036	GC-MS	GC-MS, LC-MS/MS, 1D NMR, IR
Metab		YOMSJEATGXXYPX-UHFFFAOYSA-N	HMDB0013744	GC-MS, LC-MS/MS	GC-MS, LC-MS/MS, 1D NMR, IR
Metab		QSKPIOLLBIHNAC-UHFFFAOYSA-N	HMDB0013860	None	GC-MS, MS, LC-MS/MS, IR
Metab		BSWWXRFVMJHFBN-UHFFFAOYSA-N	HMDB0029642	GC-MS, LC-MS/MS	GC-MS, LC-MS/MS
Metab		YIWUKEYIRIRTPP-UHFFFAOYSA-N	HMDB0031231	GC-MS	GC-MS, LC-MS/MS, 1D NMR, IR
Metab		AMIMRNSIRUDHCM-UHFFFAOYSA-N	HMDB0031243	GC-MS	GC-MS, LC-MS/MS, 1D NMR, IR
Metab		POAOYUHQDCAZBD-UHFFFAOYSA-N	HMDB0031327	GC-MS, LC-MS/MS	GC-MS, LC-MS/MS, 1D NMR, IR
Metab		VZIQXGLTRZLBEX-UHFFFAOYSA-N	HMDB0031335	None	GC-MS, LC-MS/MS, IR
Metab		YQUQWHNMBPIWGK-UHFFFAOYSA-N	HMDB0031446	GC-MS	GC-MS, LC-MS/MS, 1D NMR, IR
Metab		GOOHAUXETOMSMM-UHFFFAOYSA-N	HMDB0031558	GC-MS	GC-MS, LC-MS/MS, IR
Metab		NIXOWILDQLNWCW-UHFFFAOYSA-N	HMDB0031647	GC-MS, LC-MS/MS	GC-MS, LC-MS/MS, IR
Metab		XXROGKLTLUQVRX-UHFFFAOYSA-N	HMDB0031652	GC-MS	GC-MS, LC-MS/MS, 1D NMR, IR
Metab		CRBJBYGJVIBWIY-UHFFFAOYSA-N	HMDB0032029	GC-MS	GC-MS, LC-MS/MS, 1D NMR, IR, MS
Metab		VADKRMSMGWJZCF-UHFFFAOYSA-N	HMDB0032059	GC-MS	GC-MS, LC-MS/MS, 1D NMR, IR
Metab		QHPQWRBYOIRBIT-UHFFFAOYSA-N	HMDB0032063	GC-MS, LC-MS/MS	GC-MS, LC-MS/MS, IR
Metab		FAXWFCTVSHEODL-UHFFFAOYSA-N	HMDB0032079	GC-MS	GC-MS, LC-MS/MS
Metab		SSIZLKDLDKIHEV-UHFFFAOYSA-N	HMDB0032080	None	GC-MS, LC-MS/MS
Metab		QWBBPBRQALCEIZ-UHFFFAOYSA-N	HMDB0032148	GC-MS	GC-MS, LC-MS/MS, 1D NMR, IR
Metab		NXXYKOUNUYWIHA-UHFFFAOYSA-N	HMDB0032150	GC-MS	GC-MS, LC-MS/MS, 1D NMR, IR, MS
Metab		LLEMOWNGBBNAJR-UHFFFAOYSA-N	HMDB0032582	GC-MS, LC-MS/MS	GC-MS, LC-MS/MS, IR, MS
Metab		JIGUQPWFLRLWPJ-UHFFFAOYSA-N	HMDB0033978	GC-MS	GC-MS, LC-MS/MS, 1D NMR, IR
Metab		PPBRXRYQALVLMV-UHFFFAOYSA-N	HMDB0034240	GC-MS, LC-MS/MS	GC-MS, LC-MS/MS
Metab		LYCAIKOWRPUZTN-UHFFFAOYSA-N	HMDB0037790	GC-MS	GC-MS, LC-MS/MS, 1D NMR, IR
Metab		NMJJFJNHVMGPGM-UHFFFAOYSA-N	HMDB0040575	GC-MS	GC-MS, LC-MS/MS, 1D NMR, IR
Metab		HGINCPLSRVDWNT-UHFFFAOYSA-N	HMDB0041822	GC-MS	GC-MS, LC-MS/MS, 1D NMR, IR
Metab		DPVAHOUXGQHEOI-UHFFFAOYSA-N	HMDB0060333	None	GC-MS, LC-MS/MS, 1D NMR, IR
Metab		NMPVEAUIHMEAQP-UHFFFAOYSA-N	HMDB0060344	None	GC-MS, LC-MS/MS, 1D NMR, IR
Metab		CAAULPUQFIIOTL-UHFFFAOYSA-N	HMDB0061711	None	GC-MS, LC-MS/MS, 1D NMR, IR
Metab		KKUKTXOBAWVSHC-UHFFFAOYSA-N	HMDB0061734	None	GC-MS, LC-MS/MS, 1D NMR, IR
Metab		AQVKHRQMAUJBBP-UHFFFAOYSA-N	HMDB0062396	None	GC-MS, LC-MS/MS, 1D NMR, IR
Metab		GZFGOTFRPZRKDS-UHFFFAOYSA-N	HMDB0062397	GC-MS, LC-MS/MS	GC-MS, LC-MS/MS, 1D NMR, IR
Metab		AWMVMTVKBNGEAK-UHFFFAOYSA-N	HMDB0062765	GC-MS	GC-MS, LC-MS/MS, 1D NMR, IR
