# Supplementary material for: Using in silico tools to predict flame retardant metabolites for more informative exposomics-based approaches
Source: Front Toxicol. 2023 Oct 16;5:1216802. doi: 10.3389/ftox.2023.1216802 (PMC10613991; doi:10.3389/ftox.2023.1216802)
Supplement: Supplementary file 5 [file Table1.XLSX]

## Sheet: Data_Map
Sheet	Title	Description
1	EPA_CompTox_FRLikely	Full download from EPA CompTox dashboard list of 746 likely flame retardants
2	Bevington2022_Supplement	Supplement "Main FR | OFR Inventories" from Bevington, C., Williams, A.J., Guider, C. et al. Development of a Flame Retardant and an Organohalogen Flame Retardant Chemical Inventory. Sci Data 9, 295 (2022). https://doi.org/10.1038/s41597-022-01351-0
3	EPA_Bev_Annotated	Sheet 1 annotated with filters from sheet 2
4	Single_Org_FR	Sheet 3 with mixtures and inorganic compounds removed
5	Master_QSARr	Sheet 4 with QSARr SMILES sources and master
6	NoBlanks	Blank QSARr SMILES removed
7	Dedup_QSARr	Sheet 5 with deduplicated QSARr structures. First entry of duplicates was retained.
8	Dedup_References	All duplicate structures from Sheet 5.
9	Metab_Class_Link	BT and Gx metabolites (single column SMILES) linked to parents with OFR class labels

## Sheet: 1_EPA_CompTox_FRLikely
DTXSID	PREFERRED_NAME	CASRN	INCHIKEY	SMILES	QSAR_READY_SMILES	INCHI_STRING	MOLECULAR_FORMULA	AVERAGE_MASS
DTXSID00971221	Tetrakis(hydroxymethyl)phosphanium phosphate acetate (4/1/1)	55818-96-7	WPWUKAWNHCZFGG-UHFFFAOYSA-J	CC([O-])=O.[O-]P([O-])([O-])=O.OC[P+](CO)(CO)CO.OC[P+](CO)(CO)CO.OC[P+](CO)(CO)CO.OC[P+](CO)(CO)CO	OCP(CO)(CO)CO	InChI=1S/4C4H12O4P.C2H4O2.H3O4P/c4*5-1-9(2-6,3-7)4-8;1-2(3)4;1-5(2,3)4/h4*5-8H,1-4H2;1H3,(H,3,4);(H3,1,2,3,4)/q4*+1;;/p-4	C18H51O22P5	774.453
DTXSID201023178	Dibromostyrene	31780-26-4		Br*.Br*.C=CC1=CC=CC=C1 |c:6,8,t:4,lp:0:3,2:3,m:1:10.11,3:7.8.9.10|	C=CC1=CC=CC=C1		C8H6Br2	261.944
DTXSID60550652	1,1'-Oxybis(2,3,4-tribromobenzene)	182677-28-7	WFLVELCLEGVBIH-UHFFFAOYSA-N	BrC1=C(Br)C(Br)=C(OC2=C(Br)C(Br)=C(Br)C=C2)C=C1	BrC1=C(Br)C(Br)=C(OC2=C(Br)C(Br)=C(Br)C=C2)C=C1	InChI=1S/C12H4Br6O/c13-5-1-3-7(11(17)9(5)15)19-8-4-2-6(14)10(16)12(8)18/h1-4H	C12H4Br6O	643.587
DTXSID6032192	Tri-o-cresyl phosphate	78-30-8	YSMRWXYRXBRSND-UHFFFAOYSA-N	CC1=C(OP(=O)(OC2=C(C)C=CC=C2)OC2=C(C)C=CC=C2)C=CC=C1	CC1=C(OP(=O)(OC2=C(C)C=CC=C2)OC2=C(C)C=CC=C2)C=CC=C1	InChI=1S/C21H21O4P/c1-16-10-4-7-13-19(16)23-26(22,24-20-14-8-5-11-17(20)2)25-21-15-9-6-12-18(21)3/h4-15H,1-3H3	C21H21O4P	368.369
DTXSID201016676	(-)-beta-Hexabromocyclododecane	138257-18-8	DEIGXXQKDWULML-UFVWWTPHSA-N	Br[C@H]1CC[C@@H](Br)[C@@H](Br)CC[C@@H](Br)[C@H](Br)CC[C@H]1Br	BrC1CCC(Br)C(Br)CCC(Br)C(Br)CCC1Br,Br[C@H]1CC[C@@H](Br)[C@@H](Br)CC[C@@H](Br)[C@H](Br)CC[C@H]1Br	InChI=1S/C12H18Br6/c13-7-1-2-8(14)10(16)5-6-12(18)11(17)4-3-9(7)15/h7-12H,1-6H2/t7-,8-,9-,10+,11+,12-/m1/s1	C12H18Br6	641.7
DTXSID40879939	BDE-134	446254-92-8	MIBDGPWSGDWIQR-UHFFFAOYSA-N	BrC1=CC(Br)=C(Br)C(OC2=CC=CC(Br)=C2Br)=C1Br	BrC1=CC(Br)=C(Br)C(OC2=CC=CC(Br)=C2Br)=C1Br	InChI=1S/C12H4Br6O/c13-5-2-1-3-8(9(5)16)19-12-10(17)6(14)4-7(15)11(12)18/h1-4H	C12H4Br6O	643.587
DTXSID70858838	2,2',4,4',5,5'-Hexabromobiphenyl	59080-40-9	HMBBJSKXDBUNNT-UHFFFAOYSA-N	BrC1=CC(Br)=C(C=C1Br)C1=C(Br)C=C(Br)C(Br)=C1	BrC1=CC(Br)=C(C=C1Br)C1=C(Br)C=C(Br)C(Br)=C1	InChI=1S/C12H4Br6/c13-7-3-11(17)9(15)1-5(7)6-2-10(16)12(18)4-8(6)14/h1-4H	C12H4Br6	627.588
DTXSID4052712	Tripropyl phosphate	513-08-6	RXPQRKFMDQNODS-UHFFFAOYSA-N	CCCOP(=O)(OCCC)OCCC	CCCOP(=O)(OCCC)OCCC	InChI=1S/C9H21O4P/c1-4-7-11-14(10,12-8-5-2)13-9-6-3/h4-9H2,1-3H3	C9H21O4P	224.237
DTXSID30195216	1,1':3',1''-Terphenyl, 2,2',2'',3,3'',4,4',4'',5,5',5'',6,6',6''-tetradecachloro-	42429-89-0	IFURGKHWAABBAN-UHFFFAOYSA-N	ClC1=C(Cl)C(Cl)=C(C(Cl)=C1Cl)C1=C(Cl)C(=C(Cl)C(Cl)=C1Cl)C1=C(Cl)C(Cl)=C(Cl)C(Cl)=C1Cl	ClC1=C(Cl)C(Cl)=C(C(Cl)=C1Cl)C1=C(Cl)C(=C(Cl)C(Cl)=C1Cl)C1=C(Cl)C(Cl)=C(Cl)C(Cl)=C1Cl	InChI=1S/C18Cl14/c19-5-1(3-8(22)13(27)17(31)14(28)9(3)23)6(20)12(26)7(21)2(5)4-10(24)15(29)18(32)16(30)11(4)25	C18Cl14	712.5
DTXSID7032262	Tungsten trioxide	1314-35-8	ZNOKGRXACCSDPY-UHFFFAOYSA-N	O=[W](=O)=O		InChI=1S/3O.W	O3W	231.84
DTXSID6060896	Tetrachlorophthalic acid	632-58-6	WZHHYIOUKQNLQM-UHFFFAOYSA-N	OC(=O)C1=C(C(O)=O)C(Cl)=C(Cl)C(Cl)=C1Cl	OC(=O)C1=C(C(O)=O)C(Cl)=C(Cl)C(Cl)=C1Cl	InChI=1S/C8H2Cl4O4/c9-3-1(7(13)14)2(8(15)16)4(10)6(12)5(3)11/h(H,13,14)(H,15,16)	C8H2Cl4O4	303.9
DTXSID80872782	4,4'-(1-Methylethylidene)bis[2,6-dibromophenol] polymer with (chloromethyl)oxirane and 2,4,6-tribromophenol	158725-44-1
DTXSID1073157	Bis(p-tert-butylphenyl) phenyl phosphate	115-87-7	PDLPMCXGPIVYQQ-UHFFFAOYSA-N	CC(C)(C)C1=CC=C(OP(=O)(OC2=CC=CC=C2)OC2=CC=C(C=C2)C(C)(C)C)C=C1	CC(C)(C)C1=CC=C(OP(=O)(OC2=CC=CC=C2)OC2=CC=C(C=C2)C(C)(C)C)C=C1	InChI=1S/C26H31O4P/c1-25(2,3)20-12-16-23(17-13-20)29-31(27,28-22-10-8-7-9-11-22)30-24-18-14-21(15-19-24)26(4,5)6/h7-19H,1-6H3	C26H31O4P	438.504
DTXSID0021331	Tetrakis(hydroxymethyl)phosphonium sulfate	55566-30-8	YIEDHPBKGZGLIK-UHFFFAOYSA-L	[O-]S([O-])(=O)=O.OC[P+](CO)(CO)CO.OC[P+](CO)(CO)CO	OCP(CO)(CO)CO	InChI=1S/2C4H12O4P.H2O4S/c2*5-1-9(2-6,3-7)4-8;1-5(2,3)4/h2*5-8H,1-4H2;(H2,1,2,3,4)/q2*+1;/p-2	C8H24O12P2S	406.28
DTXSID30992969	Bis(1,3-dichloro-2-propyl) phosphate	72236-72-7	NNKRUBFJSSBFSS-UHFFFAOYSA-N	OP(=O)(OC(CCl)CCl)OC(CCl)CCl	OP(=O)(OC(CCl)CCl)OC(CCl)CCl	InChI=1S/C6H11Cl4O4P/c7-1-5(2-8)13-15(11,12)14-6(3-9)4-10/h5-6H,1-4H2,(H,11,12)	C6H11Cl4O4P	319.92
DTXSID00103429	Phosphonic acid, P-methyl-, dimethyl ester, polymer with oxirane and phosphorus oxide (P2O5)	70715-06-9
DTXSID20960293	Tetrakis(hydroxymethyl)phosphanium 2-hydroxypropanoate	39686-78-7	WDKVGYVKKWRCAW-UHFFFAOYSA-M	CC(O)C([O-])=O.OC[P+](CO)(CO)CO	OCP(CO)(CO)CO	InChI=1/C4H12O4P.C3H6O3/c5-1-9(2-6,3-7)4-8;1-2(4)3(5)6/h5-8H,1-4H2;2,4H,1H3,(H,5,6)/q+1;/p-1	C7H17O7P	244.18
DTXSID1061946	Phosphonic acid, P-phenyl-, dioctyl ester	1754-47-8	HAKMAMKAFTZXOZ-UHFFFAOYSA-N	CCCCCCCCOP(=O)(OCCCCCCCC)C1=CC=CC=C1	CCCCCCCCOP(=O)(OCCCCCCCC)C1=CC=CC=C1	InChI=1S/C22H39O3P/c1-3-5-7-9-11-16-20-24-26(23,22-18-14-13-15-19-22)25-21-17-12-10-8-6-4-2/h13-15,18-19H,3-12,16-17,20-21H2,1-2H3	C22H39O3P	382.525
DTXSID80858783	Tris(4-isopropylphenyl) phosphate	2502-15-0	ANVREEJNGJMLOV-UHFFFAOYSA-N	CC(C)C1=CC=C(OP(=O)(OC2=CC=C(C=C2)C(C)C)OC2=CC=C(C=C2)C(C)C)C=C1	CC(C)C1=CC=C(OP(=O)(OC2=CC=C(C=C2)C(C)C)OC2=CC=C(C=C2)C(C)C)C=C1	InChI=1S/C27H33O4P/c1-19(2)22-7-13-25(14-8-22)29-32(28,30-26-15-9-23(10-16-26)20(3)4)31-27-17-11-24(12-18-27)21(5)6/h7-21H,1-6H3	C27H33O4P	452.531
DTXSID60872629	C18-28 Chloroalkanes	85535-86-0
DTXSID301016681	diethyl (4,6-dichloro-1,3,5-triazin-2-yl)phosphonate	114955-21-4	QHDBTTWTGXXUDQ-UHFFFAOYSA-N	CCOP(=O)(OCC)C1=NC(Cl)=NC(Cl)=N1	CCOP(=O)(OCC)C1=NC(Cl)=NC(Cl)=N1	InChI=1S/C7H10Cl2N3O3P/c1-3-14-16(13,15-4-2)7-11-5(8)10-6(9)12-7/h3-4H2,1-2H3	C7H10Cl2N3O3P	286.05
DTXSID901018497	Alkanes, C14-16, chloro	1372804-76-6
DTXSID00879970	BDE-172	407606-59-1	DSRRSKFMOJQETR-UHFFFAOYSA-N	BrC1=CC(OC2=CC(Br)=C(Br)C(Br)=C2Br)=C(Br)C(Br)=C1	BrC1=CC(OC2=CC(Br)=C(Br)C(Br)=C2Br)=C(Br)C(Br)=C1	InChI=1S/C12H3Br7O/c13-4-1-5(14)9(16)7(2-4)20-8-3-6(15)10(17)12(19)11(8)18/h1-3H	C12H3Br7O	722.483
DTXSID5028902	Tar acids, cresylic, C8-rich, phosphates	68952-33-0
DTXSID4027527	1,2,5,6,9,10-Hexabromocyclododecane	3194-55-6	DEIGXXQKDWULML-UHFFFAOYSA-N	BrC1CCC(Br)C(Br)CCC(Br)C(Br)CCC1Br	BrC1CCC(Br)C(Br)CCC(Br)C(Br)CCC1Br	InChI=1/C12H18Br6/c13-7-1-2-8(14)10(16)5-6-12(18)11(17)4-3-9(7)15/h7-12H,1-6H2	C12H18Br6	641.7
DTXSID80879877	BDE-54	446254-26-8	WCDCHQGVTZHVSO-UHFFFAOYSA-N	BrC1=CC=CC(Br)=C1OC1=C(Br)C=CC=C1Br	BrC1=CC=CC(Br)=C1OC1=C(Br)C=CC=C1Br	InChI=1S/C12H6Br4O/c13-7-3-1-4-8(14)11(7)17-12-9(15)5-2-6-10(12)16/h1-6H	C12H6Br4O	485.795
DTXSID20108653	Benzene, ethenyl-, polymer with 1,3-butadiene, brominated	1195978-93-8
DTXSID00879879	BDE-57	337513-82-3	CSIFWDKYUJLQEB-UHFFFAOYSA-N	BrC1=CC=CC(OC2=CC(Br)=CC(Br)=C2Br)=C1	BrC1=CC=CC(OC2=CC(Br)=CC(Br)=C2Br)=C1	InChI=1S/C12H6Br4O/c13-7-2-1-3-9(4-7)17-11-6-8(14)5-10(15)12(11)16/h1-6H	C12H6Br4O	485.795
DTXSID90879944	BDE-141	446254-97-3	XTXIYMGRRUJOIT-UHFFFAOYSA-N	BrC1=CC(OC2=CC(Br)=C(Br)C(Br)=C2Br)=C(Br)C=C1	BrC1=CC(OC2=CC(Br)=C(Br)C(Br)=C2Br)=C(Br)C=C1	InChI=1S/C12H4Br6O/c13-5-1-2-6(14)8(3-5)19-9-4-7(15)10(16)12(18)11(9)17/h1-4H	C12H4Br6O	643.587
DTXSID30461246	3-[Hydroxy(phenyl)phosphoryl]propanoic acid	14657-64-8	MORLYCDUFHDZKO-UHFFFAOYSA-N	OC(=O)CCP(O)(=O)C1=CC=CC=C1	OC(=O)CCP(O)(=O)C1=CC=CC=C1,OC(=O)CCP(O)(=O)C1=CC=CC=C1	InChI=1S/C9H11O4P/c10-9(11)6-7-14(12,13)8-4-2-1-3-5-8/h1-5H,6-7H2,(H,10,11)(H,12,13)	C9H11O4P	214.157
DTXSID30108225	Dechlorane 603	13560-92-4
DTXSID80893715	1,1'-(Isopropylidene)bis(3,5-dibromo-4-(2,3-dibromo-2-methylpropoxy)benzene)	97416-84-7	IYOVSGHZOIZSDC-UHFFFAOYSA-N	CC(Br)(CBr)COC1=C(Br)C=C(C=C1Br)C(C)(C)C1=CC(Br)=C(OCC(C)(Br)CBr)C(Br)=C1	CC(Br)(CBr)COC1=C(Br)C=C(C=C1Br)C(C)(C)C1=CC(Br)=C(OCC(C)(Br)CBr)C(Br)=C1	InChI=1/C23H24Br8O2/c1-21(2,13-5-15(26)19(16(27)6-13)32-11-22(3,30)9-24)14-7-17(28)20(18(29)8-14)33-12-23(4,31)10-25/h5-8H,9-12H2,1-4H3	C23H24Br8O2	971.675
DTXSID1029095	Phosphoric acid, mixed 3-bromo-2,2-dimethylpropyl and 2-bromoethyl and 2-chloroethyl esters	125997-20-8		[*]OP(=O)(O[*])O[*] |$_R1;;;;;_R1;;_R1$,lp:1:2,3:2,4:2,6:2,RG:_R1={CC(C)(CBr)C* |$;;;;;;_AP1$,lp:4:3|},{BrCC* |$;;;_AP1$,lp:0:3|},{ClCC* |$;;;_AP1$,lp:0:3|}|			O4P	94.97
DTXSID80879897	BDE-78	446254-45-1	HWOBLTZZSVXBOJ-UHFFFAOYSA-N	BrC1=CC=CC(OC2=CC(Br)=C(Br)C(Br)=C2)=C1	BrC1=CC=CC(OC2=CC(Br)=C(Br)C(Br)=C2)=C1	InChI=1S/C12H6Br4O/c13-7-2-1-3-8(4-7)17-9-5-10(14)12(16)11(15)6-9/h1-6H	C12H6Br4O	485.795
DTXSID2035013	Zinc chloride	7646-85-7	JIAARYAFYJHUJI-UHFFFAOYSA-L	[Cl-].[Cl-].[Zn++]		InChI=1S/2ClH.Zn/h2*1H;/q;;+2/p-2	Cl2Zn	136.28
DTXSID9074771	PBB 103	59080-39-6	NVKQKAZYUPPRJX-UHFFFAOYSA-N	BrC1=CC(=C(Br)C=C1)C1=C(Br)C=C(Br)C=C1Br	BrC1=CC(=C(Br)C=C1)C1=C(Br)C=C(Br)C=C1Br	InChI=1S/C12H5Br5/c13-6-1-2-9(15)8(3-6)12-10(16)4-7(14)5-11(12)17/h1-5H	C12H5Br5	548.692
DTXSID00879874	BDE-50	446254-23-5	FXUAKFRJBKFDSY-UHFFFAOYSA-N	BrC1=CC(Br)=C(OC2=C(Br)C=CC=C2)C(Br)=C1	BrC1=CC(Br)=C(OC2=C(Br)C=CC=C2)C(Br)=C1	InChI=1S/C12H6Br4O/c13-7-5-9(15)12(10(16)6-7)17-11-4-2-1-3-8(11)14/h1-6H	C12H6Br4O	485.795
DTXSID50879945	BDE-142	446254-98-4	LJDGJCNHVGGOFW-UHFFFAOYSA-N	BrC1=C(OC2=C(Br)C(Br)=C(Br)C(Br)=C2Br)C=CC=C1	BrC1=C(OC2=C(Br)C(Br)=C(Br)C(Br)=C2Br)C=CC=C1	InChI=1S/C12H4Br6O/c13-5-3-1-2-4-6(5)19-12-10(17)8(15)7(14)9(16)11(12)18/h1-4H	C12H4Br6O	643.587
DTXSID90192685	3,6-Bis(bromomethyl)-1,2,4,5-tetrabromobenzene	39568-99-5	OXPRYRDKGWKGSY-UHFFFAOYSA-N	BrCC1=C(Br)C(Br)=C(CBr)C(Br)=C1Br	BrCC1=C(Br)C(Br)=C(CBr)C(Br)=C1Br	InChI=1S/C8H4Br6/c9-1-3-5(11)7(13)4(2-10)8(14)6(3)12/h1-2H2	C8H4Br6	579.544
DTXSID90881108	1,2,3-Tribromo-4-(3-bromophenoxy)benzene	446254-27-9	VIHUMJGEWQPWOT-UHFFFAOYSA-N	BrC1=CC=CC(OC2=CC=C(Br)C(Br)=C2Br)=C1	BrC1=CC=CC(OC2=CC=C(Br)C(Br)=C2Br)=C1	InChI=1S/C12H6Br4O/c13-7-2-1-3-8(6-7)17-10-5-4-9(14)11(15)12(10)16/h1-6H	C12H6Br4O	485.795
DTXSID30879867	BDE-41	337513-68-5	UAEBSKBXZAIRMX-UHFFFAOYSA-N	BrC1=CC=CC=C1OC1=C(Br)C(Br)=C(Br)C=C1	BrC1=CC=CC=C1OC1=C(Br)C(Br)=C(Br)C=C1	InChI=1S/C12H6Br4O/c13-7-3-1-2-4-9(7)17-10-6-5-8(14)11(15)12(10)16/h1-6H	C12H6Br4O	485.795
DTXSID001016694	1-(2,3-dibromopropyl)-3,5-di(prop-2-en-1-yl)-1,3,5-triazinane-2,4,6-trione	57829-89-7	JNTWOIGTWXAQNP-UHFFFAOYSA-N	BrCC(Br)CN1C(=O)N(CC=C)C(=O)N(CC=C)C1=O	BrCC(Br)CN1C(=O)N(CC=C)C(=O)N(CC=C)C1=O	InChI=1/C12H15Br2N3O3/c1-3-5-15-10(18)16(6-4-2)12(20)17(11(15)19)8-9(14)7-13/h3-4,9H,1-2,5-8H2	C12H15Br2N3O3	409.078
DTXSID8027618	Bis(2-chloroethyl) 2-chloroethylphosphonate	6294-34-4	XXIDKSWYSYEFAG-UHFFFAOYSA-N	ClCCOP(=O)(CCCl)OCCCl	ClCCOP(=O)(CCCl)OCCCl	InChI=1S/C6H12Cl3O3P/c7-1-4-11-13(10,6-3-9)12-5-2-8/h1-6H2	C6H12Cl3O3P	269.48
DTXSID80151024	1,1'-Biphenyl, 2,4,5-tribromo-	115245-07-3	BNBROTCWKGRRKT-UHFFFAOYSA-N	BrC1=CC(Br)=C(Br)C=C1C1=CC=CC=C1	BrC1=CC(Br)=C(Br)C=C1C1=CC=CC=C1	InChI=1S/C12H7Br3/c13-10-7-12(15)11(14)6-9(10)8-4-2-1-3-5-8/h1-7H	C12H7Br3	390.9
DTXSID1060558	2,4,6-Tribromoanisole	607-99-8	YXTRCOAFNXQTKL-UHFFFAOYSA-N	COC1=C(Br)C=C(Br)C=C1Br	COC1=C(Br)C=C(Br)C=C1Br	InChI=1S/C7H5Br3O/c1-11-7-5(9)2-4(8)3-6(7)10/h2-3H,1H3	C7H5Br3O	344.828
DTXSID60107625	Antiblaze 78	64176-42-7
DTXSID20879871	BDE-45	446254-21-3	VTFWUBIOZQCMQS-UHFFFAOYSA-N	BrC1=C(Br)C(OC2=C(Br)C=CC=C2)=C(Br)C=C1	BrC1=C(Br)C(OC2=C(Br)C=CC=C2)=C(Br)C=C1	InChI=1S/C12H6Br4O/c13-7-3-1-2-4-10(7)17-12-9(15)6-5-8(14)11(12)16/h1-6H	C12H6Br4O	485.795
DTXSID70879947	BDE-144	446255-00-1	ZMSJCQOCTPYCQP-UHFFFAOYSA-N	BrC1=CC(OC2=C(Br)C=C(Br)C(Br)=C2Br)=C(Br)C=C1	BrC1=CC(OC2=C(Br)C=C(Br)C(Br)=C2Br)=C(Br)C=C1	InChI=1S/C12H4Br6O/c13-5-1-2-6(14)9(3-5)19-12-8(16)4-7(15)10(17)11(12)18/h1-4H	C12H4Br6O	643.587
DTXSID701014956	4,4'-(1-Methylethylidene)bisphenol tetrabromo deriv.	121839-52-9
DTXSID90233264	1,1'-Biphenyl, 2,3',4,4',5',6-hexabromo-	84303-48-0	QYJUWEAWGVJUJE-UHFFFAOYSA-N	BrC1=CC(Br)=C(C(Br)=C1)C1=CC(Br)=C(Br)C(Br)=C1	BrC1=CC(Br)=C(C(Br)=C1)C1=CC(Br)=C(Br)C(Br)=C1	InChI=1S/C12H4Br6/c13-6-3-7(14)11(8(15)4-6)5-1-9(16)12(18)10(17)2-5/h1-4H	C12H4Br6	627.588
DTXSID9052719	(Pentabromophenyl)methyl acrylate	59447-55-1	GRKDVZMVHOLESV-UHFFFAOYSA-N	BrC1=C(Br)C(Br)=C(COC(=O)C=C)C(Br)=C1Br	BrC1=C(Br)C(Br)=C(COC(=O)C=C)C(Br)=C1Br	InChI=1S/C10H5Br5O2/c1-2-5(16)17-3-4-6(11)8(13)10(15)9(14)7(4)12/h2H,1,3H2	C10H5Br5O2	556.668
DTXSID10107312	1,3-Propanediamine, N1,N1'-1,2-ethanediylbis-, reaction products with cyclohexane and peroxidized N-butyl-2,2,6,6-tetramethyl-4-piperidinamine-2,4,6-trichloro-1,3,5-triazine reaction products	191680-81-6
DTXSID7027750	Dechlorane Plus	13560-89-9	UGQQAJOWXNCOPY-UHFFFAOYSA-N	ClC1=C(Cl)C2(Cl)C3CCC4C(CCC3C1(Cl)C2(Cl)Cl)C1(Cl)C(Cl)=C(Cl)C4(Cl)C1(Cl)Cl	ClC1=C(Cl)C2(Cl)C3CCC4C(CCC3C1(Cl)C2(Cl)Cl)C1(Cl)C(Cl)=C(Cl)C4(Cl)C1(Cl)Cl	InChI=1/C18H12Cl12/c19-9-10(20)15(25)7-3-4-8-6(2-1-5(7)13(9,23)17(15,27)28)14(24)11(21)12(22)16(8,26)18(14,29)30/h5-8H,1-4H2	C18H12Cl12	653.69
DTXSID30109297	Paraffins (petroleum), normal C>10, chloro	97553-43-0
DTXSID6024701	tert-Butylphenyl diphenyl phosphate	56803-37-3		CC(C)(C)*.O=P(OC1=CC=CC=C1)(OC1=CC=CC=C1)OC1=CC=CC=C1 |c:9,11,17,19,25,27,t:7,15,23,lp:5:2,7:2,14:2,21:2,m:4:11.12.13|
DTXSID6026246	Trioctyl phosphate	1806-54-8	WVPGXJOLGGFBCR-UHFFFAOYSA-N	CCCCCCCCOP(=O)(OCCCCCCCC)OCCCCCCCC	CCCCCCCCOP(=O)(OCCCCCCCC)OCCCCCCCC	InChI=1S/C24H51O4P/c1-4-7-10-13-16-19-22-26-29(25,27-23-20-17-14-11-8-5-2)28-24-21-18-15-12-9-6-3/h4-24H2,1-3H3	C24H51O4P	434.642
DTXSID4025828	Pentabromochlorocyclohexane	87-84-3	UZOSVZSBPTTWIG-UHFFFAOYSA-N	ClC1C(Br)C(Br)C(Br)C(Br)C1Br	ClC1C(Br)C(Br)C(Br)C(Br)C1Br	InChI=1/C6H6Br5Cl/c7-1-2(8)4(10)6(12)5(11)3(1)9/h1-6H	C6H6Br5Cl	513.08
DTXSID4038922	Tetrabromobisphenol A bis(2-hydroxyethyl) ether	4162-45-2	RVHUMFJSCJBNGS-UHFFFAOYSA-N	CC(C)(C1=CC(Br)=C(OCCO)C(Br)=C1)C1=CC(Br)=C(OCCO)C(Br)=C1	CC(C)(C1=CC(Br)=C(OCCO)C(Br)=C1)C1=CC(Br)=C(OCCO)C(Br)=C1	InChI=1S/C19H20Br4O4/c1-19(2,11-7-13(20)17(14(21)8-11)26-5-3-24)12-9-15(22)18(16(23)10-12)27-6-4-25/h7-10,24-25H,3-6H2,1-2H3	C19H20Br4O4	631.981
DTXSID301018499	Alkanes, C20-28, chloro	2097144-43-7
DTXSID40879873	BDE-48	337513-55-0	FJGDNHOVDFREMP-UHFFFAOYSA-N	BrC1=CC(Br)=C(Br)C=C1OC1=C(Br)C=CC=C1	BrC1=CC(Br)=C(Br)C=C1OC1=C(Br)C=CC=C1	InChI=1S/C12H6Br4O/c13-7-3-1-2-4-11(7)17-12-6-9(15)8(14)5-10(12)16/h1-6H	C12H6Br4O	485.795
DTXSID2026943	Pentaerythritol	115-77-5	WXZMFSXDPGVJKK-UHFFFAOYSA-N	OCC(CO)(CO)CO	OCC(CO)(CO)CO	InChI=1S/C5H12O4/c6-1-5(2-7,3-8)4-9/h6-9H,1-4H2	C5H12O4	136.147
DTXSID30879983	BDE-200	446255-46-5	JWMXGEPFVCRXQR-UHFFFAOYSA-N	BrC1=CC=C(Br)C(OC2=C(Br)C(Br)=C(Br)C(Br)=C2Br)=C1Br	BrC1=CC=C(Br)C(OC2=C(Br)C(Br)=C(Br)C(Br)=C2Br)=C1Br	InChI=1S/C12H2Br8O/c13-3-1-2-4(14)11(5(3)15)21-12-9(19)7(17)6(16)8(18)10(12)20/h1-2H	C12H2Br8O	801.379
DTXSID30879862	BDE-34	446254-17-7	XMNXHCHZIPYCNA-UHFFFAOYSA-N	BrC1=CC(OC2=C(Br)C=CC=C2)=CC(Br)=C1	BrC1=CC(OC2=C(Br)C=CC=C2)=CC(Br)=C1	InChI=1S/C12H7Br3O/c13-8-5-9(14)7-10(6-8)16-12-4-2-1-3-11(12)15/h1-7H	C12H7Br3O	406.899
DTXSID7025051	Diethyl ethylphosphonate	78-38-6	AATNZNJRDOVKDD-UHFFFAOYSA-N	CCOP(=O)(CC)OCC	CCOP(=O)(CC)OCC	InChI=1S/C6H15O3P/c1-4-8-10(7,6-3)9-5-2/h4-6H2,1-3H3	C6H15O3P	166.157
DTXSID9068407	Bis((5-ethyl-2-methyl-1,3,2-dioxaphosphorinan-5-yl)methyl) methyl phosphonate P,P'-dioxide	42595-45-9	WUGSTSBQFHQUJQ-UHFFFAOYSA-N	CCC1(COP(C)(=O)OCC2(CC)COP(C)(=O)OC2)COP(C)(=O)OC1	CCC1(COP(C)(=O)OCC2(CC)COP(C)(=O)OC2)COP(C)(=O)OC1	InChI=1S/C15H31O9P3/c1-6-14(8-19-25(3,16)20-9-14)12-23-27(5,18)24-13-15(7-2)10-21-26(4,17)22-11-15/h6-13H2,1-5H3	C15H31O9P3	448.325
DTXSID40160258	Zirconium phosphate	13765-95-2	LEHFSLREWWMLPU-UHFFFAOYSA-B	[Zr+4].[Zr+4].[Zr+4].[O-]P([O-])([O-])=O.[O-]P([O-])([O-])=O.[O-]P([O-])([O-])=O.[O-]P([O-])([O-])=O		InChI=1S/4H3O4P.3Zr/c4*1-5(2,3)4;;;/h4*(H3,1,2,3,4);;;/q;;;;3*+4/p-12	O16P4Zr3	653.551
DTXSID30879968	BDE-169	446255-18-1	JKFBMDHBJYKFKL-UHFFFAOYSA-N	BrC1=CC(OC2=CC(Br)=C(Br)C(Br)=C2)=CC(Br)=C1Br	BrC1=CC(OC2=CC(Br)=C(Br)C(Br)=C2)=CC(Br)=C1Br	InChI=1S/C12H4Br6O/c13-7-1-5(2-8(14)11(7)17)19-6-3-9(15)12(18)10(16)4-6/h1-4H	C12H4Br6O	643.587
DTXSID5034690	Magnesium dichloride	7786-30-3	TWRXJAOTZQYOKJ-UHFFFAOYSA-L	[Mg++].[Cl-].[Cl-]		InChI=1S/2ClH.Mg/h2*1H;/q;;+2/p-2	Cl2Mg	95.21
DTXSID8042476	Titanium tetrachloride	7550-45-0	XJDNKRIXUMDJCW-UHFFFAOYSA-J	Cl[Ti](Cl)(Cl)Cl		InChI=1S/4ClH.Ti/h4*1H;/q;;;;+4/p-4	Cl4Ti	189.67
DTXSID9022079	Pentabromophenol	608-71-9	SVHOVVJFOWGYJO-UHFFFAOYSA-N	OC1=C(Br)C(Br)=C(Br)C(Br)=C1Br	OC1=C(Br)C(Br)=C(Br)C(Br)=C1Br	InChI=1S/C6HBr5O/c7-1-2(8)4(10)6(12)5(11)3(1)9/h12H	C6HBr5O	488.593
DTXSID10274134	Tris(3,5-xylenyl)phosphate	25653-16-1	LLPMAOBOEQFPRE-UHFFFAOYSA-N	CC1=CC(OP(=O)(OC2=CC(C)=CC(C)=C2)OC2=CC(C)=CC(C)=C2)=CC(C)=C1	CC1=CC(OP(=O)(OC2=CC(C)=CC(C)=C2)OC2=CC(C)=CC(C)=C2)=CC(C)=C1	InChI=1S/C24H27O4P/c1-16-7-17(2)11-22(10-16)26-29(25,27-23-12-18(3)8-19(4)13-23)28-24-14-20(5)9-21(6)15-24/h7-15H,1-6H3	C24H27O4P	410.45
DTXSID10987252	2,3,4,5,2',3',4',5'-Octabromobiphenyl	67889-00-3	HHYHNDNRLUQCEG-UHFFFAOYSA-N	BrC1=C(Br)C(Br)=C(Br)C(=C1)C1=CC(Br)=C(Br)C(Br)=C1Br	BrC1=C(Br)C(Br)=C(Br)C(=C1)C1=CC(Br)=C(Br)C(Br)=C1Br	InChI=1S/C12H2Br8/c13-5-1-3(7(15)11(19)9(5)17)4-2-6(14)10(18)12(20)8(4)16/h1-2H	C12H2Br8	785.38
DTXSID9020164	Pentaerythritol dibromide	3296-90-0	CHUGKEQJSLOLHL-UHFFFAOYSA-N	OCC(CO)(CBr)CBr	OCC(CO)(CBr)CBr	InChI=1S/C5H10Br2O2/c6-1-5(2-7,3-8)4-9/h8-9H,1-4H2	C5H10Br2O2	261.941
DTXSID40929084	1,2,3,4,5,6,7,8,10,10,11,11-Dodecachloro-4,4a,4b,5,8,8a,9,9a-octahydro-1H-1,4:5,8-dimethanofluorene	13560-91-3	FUVVGRBPINDFIQ-UHFFFAOYSA-N	ClC1=C(Cl)C2(Cl)C3C(CC4C3C3(Cl)C(Cl)=C(Cl)C4(Cl)C3(Cl)Cl)C1(Cl)C2(Cl)Cl	ClC1=C(Cl)C2(Cl)C3C(CC4C3C3(Cl)C(Cl)=C(Cl)C4(Cl)C3(Cl)Cl)C1(Cl)C2(Cl)Cl	InChI=1/C15H6Cl12/c16-6-8(18)12(22)4-2(10(6,20)14(12,24)25)1-3-5(4)13(23)9(19)7(17)11(3,21)15(13,26)27/h2-5H,1H2	C15H6Cl12	611.61
DTXSID2036405	Aluminum hydroxide	21645-51-2	WNROFYMDJYEPJX-UHFFFAOYSA-K	[OH-].[OH-].[OH-].[Al+3]		InChI=1S/Al.3H2O/h;3*1H2/q+3;;;/p-3	AlH3O3	78.003
DTXSID2049634	Graphite	7782-42-5
DTXSID80212649	Trimethylphosphoramide	6326-72-3	WFIPYARNKIWELZ-UHFFFAOYSA-N	CNP(=O)(NC)NC	CNP(=O)(NC)NC	InChI=1S/C3H12N3OP/c1-4-8(7,5-2)6-3/h1-3H3,(H3,4,5,6,7)	C3H12N3OP	137.123
DTXSID30879988	BDE-198	446255-42-1	IBKRHVDFFHQOSC-UHFFFAOYSA-N	BrC1=CC(Br)=C(Br)C(OC2=C(Br)C(Br)=C(Br)C(Br)=C2Br)=C1	BrC1=CC(Br)=C(Br)C(OC2=C(Br)C(Br)=C(Br)C(Br)=C2Br)=C1	InChI=1S/C12H2Br8O/c13-3-1-4(14)6(15)5(2-3)21-12-10(19)8(17)7(16)9(18)11(12)20/h1-2H	C12H2Br8O	801.379
DTXSID1024128	Hexabromobenzene	87-82-1	CAYGQBVSOZLICD-UHFFFAOYSA-N	BrC1=C(Br)C(Br)=C(Br)C(Br)=C1Br	BrC1=C(Br)C(Br)=C(Br)C(Br)=C1Br	InChI=1S/C6Br6/c7-1-2(8)4(10)6(12)5(11)3(1)9	C6Br6	551.49
DTXSID00872800	Phenol, 4,4'-(1-methylethylidene)bis[2,6-dibromo-, polymer with carbonic dichloride, bis(2,4,6-tribromophenyl) ester	71342-77-3
DTXSID9052711	Tris(dibromophenyl) phosphate	49690-63-3	LRSNDFOWYYKLHB-UHFFFAOYSA-N	BrC1=C(Br)C(OP(=O)(OC2=CC=CC(Br)=C2Br)OC2=CC=CC(Br)=C2Br)=CC=C1	BrC1=C(Br)C(OP(=O)(OC2=CC=CC(Br)=C2Br)OC2=CC=CC(Br)=C2Br)=CC=C1	InChI=1S/C18H9Br6O4P/c19-10-4-1-7-13(16(10)22)26-29(25,27-14-8-2-5-11(20)17(14)23)28-15-9-3-6-12(21)18(15)24/h1-9H	C18H9Br6O4P	799.664
DTXSID10208772	3,3',4,4',5,5'-Hexabromobiphenyl	60044-26-0	UXOOFXUEODCAIP-UHFFFAOYSA-N	BrC1=CC(=CC(Br)=C1Br)C1=CC(Br)=C(Br)C(Br)=C1	BrC1=CC(=CC(Br)=C1Br)C1=CC(Br)=C(Br)C(Br)=C1	InChI=1S/C12H4Br6/c13-7-1-5(2-8(14)11(7)17)6-3-9(15)12(18)10(16)4-6/h1-4H	C12H4Br6	627.588
DTXSID20873773	(+/-)-gamma-Hexabromocyclododecane	134237-52-8	DEIGXXQKDWULML-MOCCIAMBSA-N	Br[C@H]1CC[C@H](Br)[C@H](Br)CC[C@@H](Br)[C@H](Br)CC[C@H]1Br	BrC1CCC(Br)C(Br)CCC(Br)C(Br)CCC1Br,Br[C@H]1CC[C@H](Br)[C@H](Br)CC[C@@H](Br)[C@H](Br)CC[C@H]1Br	InChI=1/C12H18Br6/c13-7-1-2-8(14)10(16)5-6-12(18)11(17)4-3-9(7)15/h7-12H,1-6H2/t7-,8-,9-,10+,11-,12+/s2	C12H18Br6	641.7
DTXSID50879864	BDE-37	147217-81-0	YALAYFVVZFORPV-UHFFFAOYSA-N	BrC1=CC=C(OC2=CC=C(Br)C(Br)=C2)C=C1	BrC1=CC=C(OC2=CC=C(Br)C(Br)=C2)C=C1	InChI=1S/C12H7Br3O/c13-8-1-3-9(4-2-8)16-10-5-6-11(14)12(15)7-10/h1-7H	C12H7Br3O	406.899
DTXSID80879872	BDE-46	446254-22-4	GBUUKJRFSKCMTB-UHFFFAOYSA-N	BrC1=CC=CC(OC2=C(Br)C=CC=C2Br)=C1Br	BrC1=CC=CC(OC2=C(Br)C=CC=C2Br)=C1Br	InChI=1S/C12H6Br4O/c13-7-3-2-6-10(11(7)16)17-12-8(14)4-1-5-9(12)15/h1-6H	C12H6Br4O	485.795
DTXSID80872267	2,3,3',4,4',5,6-Heptabromodiphenyl Ether	189084-68-2	OUEYHQIMJGHOQN-UHFFFAOYSA-N	BrC1=CC=C(OC2=C(Br)C(Br)=C(Br)C(Br)=C2Br)C=C1Br	BrC1=CC=C(OC2=C(Br)C(Br)=C(Br)C(Br)=C2Br)C=C1Br	InChI=1S/C12H3Br7O/c13-5-2-1-4(3-6(5)14)20-12-10(18)8(16)7(15)9(17)11(12)19/h1-3H	C12H3Br7O	722.483
DTXSID1026081	3,3',5,5'-Tetrabromobisphenol A	79-94-7	VEORPZCZECFIRK-UHFFFAOYSA-N	CC(C)(C1=CC(Br)=C(O)C(Br)=C1)C1=CC(Br)=C(O)C(Br)=C1	CC(C)(C1=CC(Br)=C(O)C(Br)=C1)C1=CC(Br)=C(O)C(Br)=C1	InChI=1S/C15H12Br4O2/c1-15(2,7-3-9(16)13(20)10(17)4-7)8-5-11(18)14(21)12(19)6-8/h3-6,20-21H,1-2H3	C15H12Br4O2	543.875
DTXSID601016680	2,4,5,6,7-pentabromo-1,1,3-trimethyl-3-(2,4,6-tribromophenyl)-2,3-dihydro-1H-indene	1025956-65-3	QADGNQKXJNSNIT-UHFFFAOYSA-N	CC1(C)C(Br)C(C)(C2=C(Br)C(Br)=C(Br)C(Br)=C12)C1=C(Br)C=C(Br)C=C1Br	CC1(C)C(Br)C(C)(C2=C(Br)C(Br)=C(Br)C(Br)=C12)C1=C(Br)C=C(Br)C=C1Br	InChI=1/C18H12Br8/c1-17(2)10-11(13(23)15(25)14(24)12(10)22)18(3,16(17)26)9-7(20)4-6(19)5-8(9)21/h4-5,16H,1-3H3	C18H12Br8	867.526
DTXSID6025800	1,2,3,4,5,6,7,8-Octachloronaphthalene	2234-13-1	RTNLUFLDZOAXIC-UHFFFAOYSA-N	ClC1=C(Cl)C2=C(Cl)C(Cl)=C(Cl)C(Cl)=C2C(Cl)=C1Cl	ClC1=C(Cl)C2=C(Cl)C(Cl)=C(Cl)C(Cl)=C2C(Cl)=C1Cl	InChI=1S/C10Cl8/c11-3-1-2(5(13)9(17)7(3)15)6(14)10(18)8(16)4(1)12	C10Cl8	403.71
DTXSID60879855	BDE-20	147217-76-3	RQJUBSPXDSGLRB-UHFFFAOYSA-N	BrC1=CC=CC(OC2=CC=CC(Br)=C2Br)=C1	BrC1=CC=CC(OC2=CC=CC(Br)=C2Br)=C1	InChI=1S/C12H7Br3O/c13-8-3-1-4-9(7-8)16-11-6-2-5-10(14)12(11)15/h1-7H	C12H7Br3O	406.899
DTXSID2069365	1H-Pyrrole-2,5-dione, 1-(2,4,6-tribromophenyl)-	59789-51-4	ONEIBTGSNPDDSB-UHFFFAOYSA-N	BrC1=CC(Br)=C(N2C(=O)C=CC2=O)C(Br)=C1	BrC1=CC(Br)=C(N2C(=O)C=CC2=O)C(Br)=C1	InChI=1S/C10H4Br3NO2/c11-5-3-6(12)10(7(13)4-5)14-8(15)1-2-9(14)16/h1-4H	C10H4Br3NO2	409.859
DTXSID40879934	BDE-127	446254-86-0	RATMRXKBPDCKCZ-UHFFFAOYSA-N	BrC1=CC(OC2=CC(Br)=C(Br)C(Br)=C2)=CC(Br)=C1	BrC1=CC(OC2=CC(Br)=C(Br)C(Br)=C2)=CC(Br)=C1	InChI=1S/C12H5Br5O/c13-6-1-7(14)3-8(2-6)18-9-4-10(15)12(17)11(16)5-9/h1-5H	C12H5Br5O	564.691
DTXSID40412148	Benzene, pentabromo(2,3-dibromopropoxy)-	32577-34-7	JHEUBGXRQQQKCW-UHFFFAOYSA-N	BrCC(Br)COC1=C(Br)C(Br)=C(Br)C(Br)=C1Br	BrCC(Br)COC1=C(Br)C(Br)=C(Br)C(Br)=C1Br,BrCC(Br)COC1=C(Br)C(Br)=C(Br)C(Br)=C1Br	InChI=1S/C9H5Br7O/c10-1-3(11)2-17-9-7(15)5(13)4(12)6(14)8(9)16/h3H,1-2H2	C9H5Br7O	688.466
DTXSID40925980	Sulfuric acid--methane (1/1)	12777-87-6	LRPCLTPZMUIPFK-UHFFFAOYSA-N	C.OS(O)(=O)=O	C	InChI=1S/CH4.H2O4S/c;1-5(2,3)4/h1H4;(H2,1,2,3,4)	CH6O4S	114.12
DTXSID2034388	Sodium tetraborate (Na2B4O7)	1330-43-4
DTXSID20783707	1,3-Dibromo-2-(3-bromophenoxy)benzene	337513-53-8	JUPZALSVNWJHII-UHFFFAOYSA-N	BrC1=CC=CC(OC2=C(Br)C=CC=C2Br)=C1	BrC1=CC=CC(OC2=C(Br)C=CC=C2Br)=C1	InChI=1S/C12H7Br3O/c13-8-3-1-4-9(7-8)16-12-10(14)5-2-6-11(12)15/h1-7H	C12H7Br3O	406.899
DTXSID0052679	Aluminium hydroxide oxide	24623-77-6	FAHBNUUHRFUEAI-UHFFFAOYSA-M	O[Al]=O		InChI=1S/Al.H2O.O/h;1H2;/q+1;;/p-1	AlHO2	59.988
DTXSID20891513	1,3,5,7,9,11-Hexabromocyclododecane	1093632-34-8	LEOCKULGXOQRTQ-UHFFFAOYSA-N	BrC1CC(Br)CC(Br)CC(Br)CC(Br)CC(Br)C1	BrC1CC(Br)CC(Br)CC(Br)CC(Br)CC(Br)C1	InChI=1S/C12H18Br6/c13-7-1-8(14)3-10(16)5-12(18)6-11(17)4-9(15)2-7/h7-12H,1-6H2	C12H18Br6	641.7
DTXSID90785354	1,2,4,5-Tetrabromo-3-(2-bromophenoxy)benzene	446254-60-0	BRTPVPJQMWLDNO-UHFFFAOYSA-N	BrC1=CC(Br)=C(Br)C(OC2=CC=CC=C2Br)=C1Br	BrC1=CC(Br)=C(Br)C(OC2=CC=CC=C2Br)=C1Br	InChI=1S/C12H5Br5O/c13-6-3-1-2-4-9(6)18-12-10(16)7(14)5-8(15)11(12)17/h1-5H	C12H5Br5O	564.691
DTXSID80879973	BDE-176	407606-61-5	SWUALKCOTZOSMY-UHFFFAOYSA-N	BrC1=CC=C(Br)C(OC2=C(Br)C=C(Br)C(Br)=C2Br)=C1Br	BrC1=CC=C(Br)C(OC2=C(Br)C=C(Br)C(Br)=C2Br)=C1Br	InChI=1S/C12H3Br7O/c13-4-1-2-5(14)11(9(4)18)20-12-7(16)3-6(15)8(17)10(12)19/h1-3H	C12H3Br7O	722.483
DTXSID3040306	Chlorendate dimethyl	1773-89-3	MDHHRPHYYRMIPH-UHFFFAOYSA-N	COC(=O)C1C(C(=O)OC)C2(Cl)C(Cl)=C(Cl)C1(Cl)C2(Cl)Cl	COC(=O)C1C(C(=O)OC)C2(Cl)C(Cl)=C(Cl)C1(Cl)C2(Cl)Cl	InChI=1/C11H8Cl6O4/c1-20-7(18)3-4(8(19)21-2)10(15)6(13)5(12)9(3,14)11(10,16)17/h3-4H,1-2H3	C11H8Cl6O4	416.88
DTXSID20439075	Tribromostyrene	875-73-0	JVPKLOPETWVKQD-UHFFFAOYSA-N	BrC(Br)=C(Br)C1=CC=CC=C1	BrC(Br)=C(Br)C1=CC=CC=C1	InChI=1S/C8H5Br3/c9-7(8(10)11)6-4-2-1-3-5-6/h1-5H	C8H5Br3	340.84
DTXSID40556652	2,2',3,3',4,5,5',6,6'-Nonobromodiphenyl ether	437701-78-5	ASGZXYIDLFWXID-UHFFFAOYSA-N	BrC1=CC(Br)=C(Br)C(OC2=C(Br)C(Br)=C(Br)C(Br)=C2Br)=C1Br	BrC1=CC(Br)=C(Br)C(OC2=C(Br)C(Br)=C(Br)C(Br)=C2Br)=C1Br	InChI=1S/C12HBr9O/c13-2-1-3(14)5(16)11(4(2)15)22-12-9(20)7(18)6(17)8(19)10(12)21/h1H	C12HBr9O	880.275
DTXSID80904259	4,4'-(propane-2,2-diyl)bis(2-bromophenol)	29426-78-6	CKNCVRMXCLUOJI-UHFFFAOYSA-N	CC(C)(C1=CC(Br)=C(O)C=C1)C1=CC(Br)=C(O)C=C1	CC(C)(C1=CC(Br)=C(O)C=C1)C1=CC(Br)=C(O)C=C1	InChI=1S/C15H14Br2O2/c1-15(2,9-3-5-13(18)11(16)7-9)10-4-6-14(19)12(17)8-10/h3-8,18-19H,1-2H3	C15H14Br2O2	386.083
DTXSID7028061	Chloroalkanes	61788-76-9
DTXSID8024319	Tetrabromodiphenyl ether	40088-47-9		[*]C1=C([*])C([*])=C(OC2=C([*])C([*])=C([*])C([*])=C2[*])C([*])=C1[*] |$_R1;;;_R1;;_R1;;;;;_R1;;_R1;;_R1;;_R1;;_R1;;_R1;;_R1$,c:1,8,16,21,t:5,12,lp:7:2,RG:_R1={Br* |$;_AP1$,lp:0:2|},LOG={_R1:;H;4}|
DTXSID2040313	Cercelor S 52	85535-85-9
DTXSID20872423	Medium-chain chlorinated paraffins (C14-17)	NOCAS_872423
DTXSID00889812	Benzenesulfonic acid, 3,3'-sulfonylbis-, potassium salt (1:2)	63316-33-6	SCIXRAVJLLWCDJ-UHFFFAOYSA-L	[K+].[K+].[O-]S(=O)(=O)C1=CC(=CC=C1)S(=O)(=O)C1=CC=CC(=C1)S([O-])(=O)=O	OS(=O)(=O)C1=CC(=CC=C1)S(=O)(=O)C1=CC(=CC=C1)S(O)(=O)=O	InChI=1S/C12H10O8S3.2K/c13-21(14,9-3-1-5-11(7-9)22(15,16)17)10-4-2-6-12(8-10)23(18,19)20;;/h1-8H,(H,15,16,17)(H,18,19,20);;/q;2*+1/p-2	C12H8K2O8S3	454.56
DTXSID60591606	1,3-Dibromo-5-phenoxybenzene	46438-88-4	FOXBZJLXVUHYQZ-UHFFFAOYSA-N	BrC1=CC(OC2=CC=CC=C2)=CC(Br)=C1	BrC1=CC(OC2=CC=CC=C2)=CC(Br)=C1	InChI=1S/C12H8Br2O/c13-9-6-10(14)8-12(7-9)15-11-4-2-1-3-5-11/h1-8H	C12H8Br2O	328.003
DTXSID6050122	Ammonium acid phosphate	10124-31-9
DTXSID50573491	1,2,3-Tribromo-5-(3,4-dibromophenoxy)benzene	366791-32-4	SJNIIWPIAVQNRK-UHFFFAOYSA-N	BrC1=CC(OC2=CC(Br)=C(Br)C=C2)=CC(Br)=C1Br	BrC1=CC(OC2=CC(Br)=C(Br)C=C2)=CC(Br)=C1Br	InChI=1S/C12H5Br5O/c13-8-2-1-6(3-9(8)14)18-7-4-10(15)12(17)11(16)5-7/h1-5H	C12H5Br5O	564.691
DTXSID0058695	2,4,6-Tris-(2,4,6-tribromophenoxy)-1,3,5-triazine	25713-60-4	BDFBPPCACYFGFA-UHFFFAOYSA-N	BrC1=CC(Br)=C(OC2=NC(OC3=C(Br)C=C(Br)C=C3Br)=NC(OC3=C(Br)C=C(Br)C=C3Br)=N2)C(Br)=C1	BrC1=CC(Br)=C(OC2=NC(OC3=C(Br)C=C(Br)C=C3Br)=NC(OC3=C(Br)C=C(Br)C=C3Br)=N2)C(Br)=C1	InChI=1S/C21H6Br9N3O3/c22-7-1-10(25)16(11(26)2-7)34-19-31-20(35-17-12(27)3-8(23)4-13(17)28)33-21(32-19)36-18-14(29)5-9(24)6-15(18)30/h1-6H	C21H6Br9N3O3	1067.43
DTXSID60229856	3,5-Dibromo-2-(2,4-dibromophenoxy)phenol	79755-43-4	SNCQITRZEBFIRW-UHFFFAOYSA-N	OC1=C(OC2=C(Br)C=C(Br)C=C2)C(Br)=CC(Br)=C1	OC1=C(OC2=C(Br)C=C(Br)C=C2)C(Br)=CC(Br)=C1	InChI=1S/C12H6Br4O2/c13-6-1-2-11(8(15)3-6)18-12-9(16)4-7(14)5-10(12)17/h1-5,17H	C12H6Br4O2	501.794
DTXSID0024553	Azodicarbonamide	123-77-3	XOZUGNYVDXMRKW-UHFFFAOYSA-N	NC(=O)N=NC(N)=O	NC(=O)N=NC(N)=O	InChI=1S/C2H4N4O2/c3-1(7)5-6-2(4)8/h(H2,3,7)(H2,4,8)	C2H4N4O2	116.08
DTXSID60219338	2,2',3,3',4,4',5-Heptabromobiphenyl	69278-60-0	MUVQKYHTVKKBFK-UHFFFAOYSA-N	BrC1=C(Br)C(Br)=C(C=C1)C1=CC(Br)=C(Br)C(Br)=C1Br	BrC1=C(Br)C(Br)=C(C=C1)C1=CC(Br)=C(Br)C(Br)=C1Br	InChI=1S/C12H3Br7/c13-6-2-1-4(8(15)10(6)17)5-3-7(14)11(18)12(19)9(5)16/h1-3H	C12H3Br7	706.484
DTXSID90879929	BDE-121	446254-81-5	GVGNVZBJVFDAAO-UHFFFAOYSA-N	BrC1=CC(Br)=C(OC2=CC(Br)=CC(Br)=C2)C(Br)=C1	BrC1=CC(Br)=C(OC2=CC(Br)=CC(Br)=C2)C(Br)=C1	InChI=1S/C12H5Br5O/c13-6-1-7(14)3-9(2-6)18-12-10(16)4-8(15)5-11(12)17/h1-5H	C12H5Br5O	564.691
DTXSID8024947	1,2-Dibromo-4-(1,2-dibromoethyl)cyclohexane	3322-93-8	PQRRSJBLKOPVJV-UHFFFAOYSA-N	BrCC(Br)C1CCC(Br)C(Br)C1	BrCC(Br)C1CCC(Br)C(Br)C1	InChI=1/C8H12Br4/c9-4-8(12)5-1-2-6(10)7(11)3-5/h5-8H,1-4H2	C8H12Br4	427.8
DTXSID701016695	Bromkal 80	61288-13-9
DTXSID20879896	BDE-76	446254-43-9	NCSWBJSFVPJPPK-UHFFFAOYSA-N	BrC1=CC(OC2=CC=CC=C2Br)=CC(Br)=C1Br	BrC1=CC(OC2=CC=CC=C2Br)=CC(Br)=C1Br	InChI=1S/C12H6Br4O/c13-8-3-1-2-4-11(8)17-7-5-9(14)12(16)10(15)6-7/h1-6H	C12H6Br4O	485.795
DTXSID201016707	(rel)-(1R,2S,3S,4S)-1,2,3,9-tetrabromo-1,2,3,4-tetrahydro-1,4-methanonaphthalene	855993-01-0	YQOLUCYVQSZPIT-DGHBSWOJSA-N	[H]C1(Br)[C@]2([H])[C@H](Br)[C@H](Br)[C@@]1(Br)C1=CC=CC=C21	[H]C1(Br)[C@]2([H])[C@H](Br)[C@H](Br)[C@@]1(Br)C1=CC=CC=C21,BrC1C(Br)C2(Br)C(Br)C1C1=C2C=CC=C1	InChI=1/C11H8Br4/c12-8-7-5-3-1-2-4-6(5)11(15,9(7)13)10(8)14/h1-4,7-10H/t7-,8-,9?,10-,11+/s2	C11H8Br4	459.801
DTXSID7027887	Bis(2-ethylhexyl) tetrabromophthalate	26040-51-7	UUEDINPOVKWVAZ-UHFFFAOYSA-N	CCCCC(CC)COC(=O)C1=C(Br)C(Br)=C(Br)C(Br)=C1C(=O)OCC(CC)CCCC	CCCCC(CC)COC(=O)C1=C(Br)C(Br)=C(Br)C(Br)=C1C(=O)OCC(CC)CCCC	InChI=1/C24H34Br4O4/c1-5-9-11-15(7-3)13-31-23(29)17-18(20(26)22(28)21(27)19(17)25)24(30)32-14-16(8-4)12-10-6-2/h15-16H,5-14H2,1-4H3	C24H34Br4O4	706.148
DTXSID60988350	Diphenyl methylphosphonate--4,4'-(propane-2,2-diyl)diphenol (1/1)	68664-06-2	BGOVZUITOWENCB-UHFFFAOYSA-N	CC(C)(C1=CC=C(O)C=C1)C1=CC=C(O)C=C1.CP(=O)(OC1=CC=CC=C1)OC1=CC=CC=C1		InChI=1S/C15H16O2.C13H13O3P/c1-15(2,11-3-7-13(16)8-4-11)12-5-9-14(17)10-6-12;1-17(14,15-12-8-4-2-5-9-12)16-13-10-6-3-7-11-13/h3-10,16-17H,1-2H3;2-11H,1H3	C28H29O5P	476.509
DTXSID60975467	2,2',4,5-Tetrabromo-1,1'-biphenyl	958802-46-5	PALAXWMMBSLIDB-UHFFFAOYSA-N	BrC1=CC=CC=C1C1=CC(Br)=C(Br)C=C1Br	BrC1=CC=CC=C1C1=CC(Br)=C(Br)C=C1Br	InChI=1S/C12H6Br4/c13-9-4-2-1-3-7(9)8-5-11(15)12(16)6-10(8)14/h1-6H	C12H6Br4	469.796
DTXSID40105260	C10-13 chloro alkanes	85535-84-8
DTXSID30881107	2,2′,3,3′,4,4′,5,5′,6-Nonabromodiphenyl ether	63387-28-0	CYRHBNRLQMLULE-UHFFFAOYSA-N	BrC1=CC(OC2=C(Br)C(Br)=C(Br)C(Br)=C2Br)=C(Br)C(Br)=C1Br	BrC1=CC(OC2=C(Br)C(Br)=C(Br)C(Br)=C2Br)=C(Br)C(Br)=C1Br	InChI=1S/C12HBr9O/c13-2-1-3(5(15)6(16)4(2)14)22-12-10(20)8(18)7(17)9(19)11(12)21/h1H	C12HBr9O	880.275
DTXSID20894685	Dicresyl phenyl phosphate	26446-73-1
DTXSID10886791	Diphosphoric acid, compd. with piperazine (1:1)	66034-17-1	MWFNQNPDUTULBC-UHFFFAOYSA-N	C1CNCCN1.OP(O)(=O)OP(O)(O)=O	C1CNCCN1	InChI=1S/C4H10N2.H4O7P2/c1-2-6-4-3-5-1;1-8(2,3)7-9(4,5)6/h5-6H,1-4H2;(H2,1,2,3)(H2,4,5,6)	C4H14N2O7P2	264.111
DTXSID20879917	BDE-105	373594-78-6	LBPWAGZGYNOKAM-UHFFFAOYSA-N	BrC1=CC=C(OC2=CC(Br)=C(Br)C=C2)C(Br)=C1Br	BrC1=CC=C(OC2=CC(Br)=C(Br)C=C2)C(Br)=C1Br	InChI=1S/C12H5Br5O/c13-7-2-1-6(5-9(7)15)18-10-4-3-8(14)11(16)12(10)17/h1-5H	C12H5Br5O	564.691
DTXSID7047514	Calcium sulfate dihydrate	10101-41-4	PASHVRUKOFIRIK-UHFFFAOYSA-L	O.O.[Ca++].[O-]S([O-])(=O)=O		InChI=1S/Ca.H2O4S.2H2O/c;1-5(2,3)4;;/h;(H2,1,2,3,4);2*1H2/q+2;;;/p-2	CaH4O6S	172.16
DTXSID6024626	1,2-Bis(tetrabromophthalimido)ethane	32588-76-4	DYIZJUDNMOIZQO-UHFFFAOYSA-N	BrC1=C2C(=O)N(CCN3C(=O)C4=C(C3=O)C(Br)=C(Br)C(Br)=C4Br)C(=O)C2=C(Br)C(Br)=C1Br	BrC1=C2C(=O)N(CCN3C(=O)C4=C(C3=O)C(Br)=C(Br)C(Br)=C4Br)C(=O)C2=C(Br)C(Br)=C1Br	InChI=1S/C18H4Br8N2O4/c19-7-3-4(8(20)12(24)11(7)23)16(30)27(15(3)29)1-2-28-17(31)5-6(18(28)32)10(22)14(26)13(25)9(5)21/h1-2H2	C18H4Br8N2O4	951.472
DTXSID50879869	BDE-43	446254-19-9	LKMQHSYDVDIECC-UHFFFAOYSA-N	BrC1=CC(OC2=CC=CC=C2Br)=C(Br)C(Br)=C1	BrC1=CC(OC2=CC=CC=C2Br)=C(Br)C(Br)=C1	InChI=1S/C12H6Br4O/c13-7-5-9(15)12(16)11(6-7)17-10-4-2-1-3-8(10)14/h1-6H	C12H6Br4O	485.795
DTXSID00904130	2-Bromoallyl 2,4,6-tribromophenyl ether	99717-56-3	RLPZXGWCSHFKJI-UHFFFAOYSA-N	BrC(=C)COC1=C(Br)C=C(Br)C=C1Br	BrC(=C)COC1=C(Br)C=C(Br)C=C1Br	InChI=1S/C9H6Br4O/c1-5(10)4-14-9-7(12)2-6(11)3-8(9)13/h2-3H,1,4H2	C9H6Br4O	449.762
DTXSID60974814	Tetrakis(hydroxymethyl)phosphanium bromide	5940-69-2	XAAGVNUUSJZVIC-UHFFFAOYSA-M	[Br-].OC[P+](CO)(CO)CO	OCP(CO)(CO)CO	InChI=1S/C4H12O4P.BrH/c5-1-9(2-6,3-7)4-8;/h5-8H,1-4H2;1H/q+1;/p-1	C4H12BrO4P	235.014
DTXSID9066752	Phosphonium, tetrakis(hydroxymethyl)-, phosphate (3:1) (salt)	22031-17-0	ZTBDCHNXDHUMCJ-UHFFFAOYSA-K	[O-]P([O-])([O-])=O.OC[P+](CO)(CO)CO.OC[P+](CO)(CO)CO.OC[P+](CO)(CO)CO	OCP(CO)(CO)CO	InChI=1S/3C4H12O4P.H3O4P/c3*5-1-9(2-6,3-7)4-8;1-5(2,3)4/h3*5-8H,1-4H2;(H3,1,2,3,4)/q3*+1;/p-3	C12H36O16P4	560.299
DTXSID7020895	Mirex	2385-85-5	GVYLCNUFSHDAAW-UHFFFAOYSA-N	ClC12C3(Cl)C4(Cl)C5(Cl)C(Cl)(C1(Cl)C4(Cl)Cl)C2(Cl)C(Cl)(Cl)C35Cl	ClC12C3(Cl)C4(Cl)C5(Cl)C(Cl)(C1(Cl)C4(Cl)Cl)C2(Cl)C(Cl)(Cl)C35Cl	InChI=1S/C10Cl12/c11-1-2(12)7(17)4(14)3(13,5(1,15)9(7,19)20)6(1,16)10(21,22)8(2,4)18	C10Cl12	545.51
DTXSID5051317	Diammonium tetraborate	12007-58-8	AUTNMGCKBXKHNV-UHFFFAOYSA-P	[NH4+].[NH4+].[O-]B1OB2OB([O-])OB(O1)O2		InChI=1S/B4O7.2H3N/c5-1-7-3-9-2(6)10-4(8-1)11-3;;/h;2*1H3/q-2;;/p+2	B4H8N2O7	191.31
DTXSID60879931	BDE-123	446254-83-7	SBKMUEQNZNDYFW-UHFFFAOYSA-N	BrC1=CC(Br)=C(OC2=CC(Br)=C(Br)C(Br)=C2)C=C1	BrC1=CC(Br)=C(OC2=CC(Br)=C(Br)C(Br)=C2)C=C1	InChI=1S/C12H5Br5O/c13-6-1-2-11(8(14)3-6)18-7-4-9(15)12(17)10(16)5-7/h1-5H	C12H5Br5O	564.691
DTXSID10873929	2,2',4,4',6,6'-Hexabromodiphenyl Ether	35854-94-5	HRSCBOSGEKXXSI-UHFFFAOYSA-N	BrC1=CC(Br)=C(OC2=C(Br)C=C(Br)C=C2Br)C(Br)=C1	BrC1=CC(Br)=C(OC2=C(Br)C=C(Br)C=C2Br)C(Br)=C1	InChI=1S/C12H4Br6O/c13-5-1-7(15)11(8(16)2-5)19-12-9(17)3-6(14)4-10(12)18/h1-4H	C12H4Br6O	643.587
DTXSID0075108	1,1'-Biphenyl, 3,3',5,5'-tetrabromo-	16400-50-3	FXJXZYWFJAXIJX-UHFFFAOYSA-N	BrC1=CC(=CC(Br)=C1)C1=CC(Br)=CC(Br)=C1	BrC1=CC(=CC(Br)=C1)C1=CC(Br)=CC(Br)=C1	InChI=1S/C12H6Br4/c13-9-1-7(2-10(14)5-9)8-3-11(15)6-12(16)4-8/h1-6H	C12H6Br4	469.796
DTXSID501017116	Phosphonium, tetrakis(hydroxymethyl)-, salt with cellulose carboxymethyl ether	73083-23-5
DTXSID201016690	2,3,4,5-Tetrabromobenzoic Acid	27581-13-1	KVILQONZZZERSG-UHFFFAOYSA-N	OC(=O)C1=C(Br)C(Br)=C(Br)C(Br)=C1	OC(=O)C1=C(Br)C(Br)=C(Br)C(Br)=C1	InChI=1S/C7H2Br4O2/c8-3-1-2(7(12)13)4(9)6(11)5(3)10/h1H,(H,12,13)	C7H2Br4O2	437.707
DTXSID901016677	4,5,6,7-tetrabromo-1,1,3-trimethyl-3-(2,3,4,6-tetrabromophenyl)-2,3-dihydro-1H-indene	893843-07-7	XJAWWDJBEFQGCJ-UHFFFAOYSA-N	CC1(C)CC(C)(C2=C(Br)C(Br)=C(Br)C(Br)=C12)C1=C(Br)C(Br)=C(Br)C=C1Br	CC1(C)CC(C)(C2=C(Br)C(Br)=C(Br)C(Br)=C12)C1=C(Br)C(Br)=C(Br)C=C1Br	InChI=1/C18H12Br8/c1-17(2)5-18(3,8-6(19)4-7(20)11(21)12(8)22)10-9(17)13(23)15(25)16(26)14(10)24/h4H,5H2,1-3H3	C18H12Br8	867.526
DTXSID90199295	Triisopropyl phosphate	513-02-0	OXFUXNFMHFCELM-UHFFFAOYSA-N	CC(C)OP(=O)(OC(C)C)OC(C)C	CC(C)OP(=O)(OC(C)C)OC(C)C	InChI=1S/C9H21O4P/c1-7(2)11-14(10,12-8(3)4)13-9(5)6/h7-9H,1-6H3	C9H21O4P	224.237
DTXSID10892231	3,5,3',5'-Tetrabromobisphenol A, epichlorohydrin polymer	40039-93-8
DTXSID60879916	BDE-104	446254-68-8	CRSCWEYUPUKHPI-UHFFFAOYSA-N	BrC1=CC(Br)=C(OC2=C(Br)C=CC=C2Br)C(Br)=C1	BrC1=CC(Br)=C(OC2=C(Br)C=CC=C2Br)C(Br)=C1	InChI=1S/C12H5Br5O/c13-6-4-9(16)12(10(17)5-6)18-11-7(14)2-1-3-8(11)15/h1-5H	C12H5Br5O	564.691
DTXSID10879981	BDE-193	446255-34-1	AUFJSWANTKXCFZ-UHFFFAOYSA-N	BrC1=CC(Br)=C(Br)C(OC2=CC(Br)=C(Br)C(Br)=C2)=C1Br	BrC1=CC(Br)=C(Br)C(OC2=CC(Br)=C(Br)C(Br)=C2)=C1Br	InChI=1S/C12H3Br7O/c13-5-1-4(2-6(14)9(5)17)20-12-10(18)7(15)3-8(16)11(12)19/h1-3H	C12H3Br7O	722.483
DTXSID9070406	2,2-Bis(bromomethyl)-3-chloropropyl bis[2-chloro-1-(chloromethyl)ethyl] phosphate	66108-37-0	XPNOZWKYSGBXLU-UHFFFAOYSA-N	ClCC(CCl)OP(=O)(OCC(CCl)(CBr)CBr)OC(CCl)CCl	ClCC(CCl)OP(=O)(OCC(CCl)(CBr)CBr)OC(CCl)CCl	InChI=1S/C11H18Br2Cl5O4P/c12-5-11(6-13,7-18)8-20-23(19,21-9(1-14)2-15)22-10(3-16)4-17/h9-10H,1-8H2	C11H18Br2Cl5O4P	582.29
DTXSID7060910	1,2,4,5-Tetrabromobenzene	636-28-2	QCKHVNQHBOGZER-UHFFFAOYSA-N	BrC1=CC(Br)=C(Br)C=C1Br	BrC1=CC(Br)=C(Br)C=C1Br	InChI=1S/C6H2Br4/c7-3-1-4(8)6(10)2-5(3)9/h1-2H	C6H2Br4	393.698
DTXSID4044161	Antimony trichloride	10025-91-9	FAPDDOBMIUGHIN-UHFFFAOYSA-K	Cl[Sb](Cl)Cl		InChI=1S/3ClH.Sb/h3*1H;/q;;;+3/p-3	Cl3Sb	228.11
DTXSID20879972	BDE-175	446255-22-7	YATZWTXATDYQCK-UHFFFAOYSA-N	BrC1=CC(OC2=C(Br)C=C(Br)C(Br)=C2Br)=C(Br)C(Br)=C1	BrC1=CC(OC2=C(Br)C=C(Br)C(Br)=C2Br)=C(Br)C(Br)=C1	InChI=1S/C12H3Br7O/c13-4-1-5(14)9(17)8(2-4)20-12-7(16)3-6(15)10(18)11(12)19/h1-3H	C12H3Br7O	722.483
DTXSID601009714	1,3,5-Triazine-2,4,6-triamine, polymer with formaldehyde	9003-08-1
DTXSID3021770	2,2',6,6'-Tetrachlorobisphenol A	79-95-8	KYPYTERUKNKOLP-UHFFFAOYSA-N	CC(C)(C1=CC(Cl)=C(O)C(Cl)=C1)C1=CC(Cl)=C(O)C(Cl)=C1	CC(C)(C1=CC(Cl)=C(O)C(Cl)=C1)C1=CC(Cl)=C(O)C(Cl)=C1	InChI=1S/C15H12Cl4O2/c1-15(2,7-3-9(16)13(20)10(17)4-7)8-5-11(18)14(21)12(19)6-8/h3-6,20-21H,1-2H3	C15H12Cl4O2	366.06
DTXSID70218115	2,2',3,4,4',5-Hexabromobiphenyl	67888-98-6	BSOYYFPGSFVZRZ-UHFFFAOYSA-N	BrC1=CC(Br)=C(Br)C=C1C1=C(Br)C(Br)=C(Br)C=C1	BrC1=CC(Br)=C(Br)C=C1C1=C(Br)C(Br)=C(Br)C=C1	InChI=1S/C12H4Br6/c13-7-2-1-5(11(17)12(7)18)6-3-9(15)10(16)4-8(6)14/h1-4H	C12H4Br6	627.588
DTXSID6025484	Isopropyl phenyl diphenyl phosphate	28108-99-8		CC(C)*.O=P(OC1=CC=CC=C1)(OC1=CC=CC=C1)OC1=CC=CC=C1 |c:8,10,16,18,24,26,t:6,14,22,lp:4:2,6:2,13:2,20:2,m:3:15.16.17|
DTXSID00872789	Tris(diethylphosphinato)aluminium	225789-38-8	XSAOTYCWGCRGCP-UHFFFAOYSA-K	[Al+3].CCP([O-])(=O)CC.CCP([O-])(=O)CC.CCP([O-])(=O)CC	CCP(O)(=O)CC	InChI=1S/3C4H11O2P.Al/c3*1-3-7(5,6)4-2;/h3*3-4H2,1-2H3,(H,5,6);/q;;;+3/p-3	C12H30AlO6P3	390.269
DTXSID1064746	Phosphonium, tetrakis(hydroxymethyl)-, acetate (salt)	7580-37-2	VELJAQNIUXJKSV-UHFFFAOYSA-M	CC([O-])=O.OC[P+](CO)(CO)CO	OCP(CO)(CO)CO	InChI=1S/C4H12O4P.C2H4O2/c5-1-9(2-6,3-7)4-8;1-2(3)4/h5-8H,1-4H2;1H3,(H,3,4)/q+1;/p-1	C6H15O6P	214.154
DTXSID60879875	BDE-52	446254-24-6	CDTHXJORUCZHMD-UHFFFAOYSA-N	BrC1=CC(OC2=CC(Br)=CC=C2Br)=C(Br)C=C1	BrC1=CC(OC2=CC(Br)=CC=C2Br)=C(Br)C=C1	InChI=1S/C12H6Br4O/c13-7-1-3-9(15)11(5-7)17-12-6-8(14)2-4-10(12)16/h1-6H	C12H6Br4O	485.795
DTXSID40879898	BDE-79	446254-48-4	LELQGHJEUVRPEV-UHFFFAOYSA-N	BrC1=CC(OC2=CC=C(Br)C(Br)=C2)=CC(Br)=C1	BrC1=CC(OC2=CC=C(Br)C(Br)=C2)=CC(Br)=C1	InChI=1S/C12H6Br4O/c13-7-3-8(14)5-10(4-7)17-9-1-2-11(15)12(16)6-9/h1-6H	C12H6Br4O	485.795
DTXSID30866010	4,7-Methano-1H-isoindole-1,3(2H)-dione, 5,6-dibromohexahydro-2-phenyl-	40703-79-5	JNUMSHAQCAUPTM-UHFFFAOYSA-N	BrC1C(Br)C2CC1C1C2C(=O)N(C1=O)C1=CC=CC=C1	BrC1C(Br)C2CC1C1C2C(=O)N(C1=O)C1=CC=CC=C1	InChI=1/C15H13Br2NO2/c16-12-8-6-9(13(12)17)11-10(8)14(19)18(15(11)20)7-4-2-1-3-5-7/h1-5,8-13H,6H2	C15H13Br2NO2	399.082
DTXSID90953470	1,3,5,7-Tetrabromocyclooctane	31454-48-5	RTLBBTQCDMYRRE-UHFFFAOYSA-N	BrC1CC(Br)CC(Br)CC(Br)C1	BrC1CC(Br)CC(Br)CC(Br)C1	InChI=1S/C8H12Br4/c9-5-1-6(10)3-8(12)4-7(11)2-5/h5-8H,1-4H2	C8H12Br4	427.8
DTXSID90872773	Diphosphoric acid, zinc salt, compd. with 1,​3,​5-​triazine-​2,​4,​6-​triamine (1:1:2)	1271172-98-5	QXXDKNZPHFLEKM-UHFFFAOYSA-L	NC1=NC(N)=NC(=[NH2+])N1.NC1=NC(N)=NC(=[NH2+])N1.[O-]P1(=O)O[Zn]OP([O-])(=O)O1	NC1=NC(N)=NC(N)=N1	InChI=1S/2C3H6N6.H4O7P2.Zn/c2*4-1-7-2(5)9-3(6)8-1;1-8(2,3)7-9(4,5)6;/h2*(H6,4,5,6,7,8,9);(H2,1,2,3)(H2,4,5,6);/q;;;+2/p-2	C6H14N12O7P2Zn	493.58
DTXSID0020494	Dimethyl methylphosphonate	756-79-6	VONWDASPFIQPDY-UHFFFAOYSA-N	COP(C)(=O)OC	COP(C)(=O)OC	InChI=1S/C3H9O3P/c1-5-7(3,4)6-2/h1-3H3	C3H9O3P	124.076
DTXSID80858925	Alkanes, C22-40, chloro	106232-86-4
DTXSID20872645	Triphenyl phosphates tert-butylated	68937-40-6
DTXSID90700608	1,1,2,2-Tetrabromocyclododecane	30178-92-8	TUVSSHVDKQGKBK-UHFFFAOYSA-N	BrC1(Br)CCCCCCCCCCC1(Br)Br	BrC1(Br)CCCCCCCCCCC1(Br)Br	InChI=1S/C12H20Br4/c13-11(14)9-7-5-3-1-2-4-6-8-10-12(11,15)16/h1-10H2	C12H20Br4	483.908
DTXSID70872791	Bisphenol A-epichlorohydrin-2,2',6,6'-tetrabromobisphenol A copolymer	26265-08-7
DTXSID7047489	Vermiculite	1318-00-9
DTXSID2034384	Borax (B4Na2O7.10H2O)	1303-96-4
DTXSID70872776	Zinc Borate 2335	138265-88-0
DTXSID90879984	BDE-201	446255-50-1	HQWFMMKREWXIGN-UHFFFAOYSA-N	BrC1=CC(Br)=C(OC2=C(Br)C(Br)=CC(Br)=C2Br)C(Br)=C1Br	BrC1=CC(Br)=C(OC2=C(Br)C(Br)=CC(Br)=C2Br)C(Br)=C1Br	InChI=1S/C12H2Br8O/c13-3-2-6(16)11(10(20)7(3)17)21-12-8(18)4(14)1-5(15)9(12)19/h1-2H	C12H2Br8O	801.379
DTXSID70728087	1,2,3,4,5-Pentabromo-6-(chloromethyl)benzene	58495-09-3	UJJSQULCWJOFRO-UHFFFAOYSA-N	ClCC1=C(Br)C(Br)=C(Br)C(Br)=C1Br	ClCC1=C(Br)C(Br)=C(Br)C(Br)=C1Br	InChI=1S/C7H2Br5Cl/c8-3-2(1-13)4(9)6(11)7(12)5(3)10/h1H2	C7H2Br5Cl	521.06
DTXSID50448655	2,2',3,4,4',6,6'-Heptabromodiphenyl ether	117948-63-7	JHDCZVAQPRXHEL-UHFFFAOYSA-N	BrC1=CC(Br)=C(OC2=C(Br)C(Br)=C(Br)C=C2Br)C(Br)=C1	BrC1=CC(Br)=C(OC2=C(Br)C(Br)=C(Br)C=C2Br)C(Br)=C1	InChI=1S/C12H3Br7O/c13-4-1-6(15)11(7(16)2-4)20-12-8(17)3-5(14)9(18)10(12)19/h1-3H	C12H3Br7O	722.483
DTXSID00886624	Butanedioic acid, 2-[(6-oxido-6H-dibenz[c,e][1,2]oxaphosphorin-6-yl)methyl]-	63562-33-4	XZAXQWXHBDKYJI-UHFFFAOYSA-N	OC(=O)CC(CP1(=O)OC2=C(C=CC=C2)C2=C1C=CC=C2)C(O)=O	OC(=O)CC(CP1(=O)OC2=C(C=CC=C2)C2=C1C=CC=C2)C(O)=O	InChI=1/C17H15O6P/c18-16(19)9-11(17(20)21)10-24(22)15-8-4-2-6-13(15)12-5-1-3-7-14(12)23-24/h1-8,11H,9-10H2,(H,18,19)(H,20,21)	C17H15O6P	346.275
DTXSID10879946	BDE-143	446254-99-5	RQLZDUSZXOOBTM-UHFFFAOYSA-N	BrC1=CC=CC(Br)=C1OC1=CC(Br)=C(Br)C(Br)=C1Br	BrC1=CC=CC(Br)=C1OC1=CC(Br)=C(Br)C(Br)=C1Br	InChI=1S/C12H4Br6O/c13-5-2-1-3-6(14)12(5)19-8-4-7(15)9(16)11(18)10(8)17/h1-4H	C12H4Br6O	643.587
DTXSID80149507	Antimonic acid, sodium salt	11112-10-0	NSBGJRFJIJFMGW-UHFFFAOYSA-N	[Na+].[Na+].[Na+].[O-][Sb]([O-])([O-])=O		InChI=1S/3Na.4O.Sb/q3*+1;;3*-1;	Na3O4Sb	254.725
DTXSID401029839	Tribromotrichlorocyclohexane	30554-73-5
DTXSID00879854	BDE-19	147217-73-0	YDFQHBRKURQGAH-UHFFFAOYSA-N	BrC1=CC=CC=C1OC1=C(Br)C=CC=C1Br	BrC1=CC=CC=C1OC1=C(Br)C=CC=C1Br	InChI=1S/C12H7Br3O/c13-8-4-1-2-7-11(8)16-12-9(14)5-3-6-10(12)15/h1-7H	C12H7Br3O	406.899
DTXSID3030056	2,2',4,4'-Tetrabromodiphenyl ether	5436-43-1	XYBSIYMGXVUVGY-UHFFFAOYSA-N	BrC1=CC(Br)=C(OC2=CC=C(Br)C=C2Br)C=C1	BrC1=CC(Br)=C(OC2=CC=C(Br)C=C2Br)C=C1	InChI=1S/C12H6Br4O/c13-7-1-3-11(9(15)5-7)17-12-4-2-8(14)6-10(12)16/h1-6H	C12H6Br4O	485.795
DTXSID90573490	1,4-Dibromo-2-(4-bromophenoxy)benzene	65075-08-3	PURZBWMLFRWRMG-UHFFFAOYSA-N	BrC1=CC=C(OC2=C(Br)C=CC(Br)=C2)C=C1	BrC1=CC=C(OC2=C(Br)C=CC(Br)=C2)C=C1	InChI=1S/C12H7Br3O/c13-8-1-4-10(5-2-8)16-12-7-9(14)3-6-11(12)15/h1-7H	C12H7Br3O	406.899
DTXSID30879963	BDE-164	446255-15-8	UJVYVXIHTJOJBZ-UHFFFAOYSA-N	BrC1=CC(OC2=C(Br)C=CC(Br)=C2Br)=CC(Br)=C1Br	BrC1=CC(OC2=C(Br)C=CC(Br)=C2Br)=CC(Br)=C1Br	InChI=1S/C12H4Br6O/c13-6-1-2-7(14)12(11(6)18)19-5-3-8(15)10(17)9(16)4-5/h1-4H	C12H4Br6O	643.587
DTXSID2026941	Chlorendic anhydride	115-27-5	FLBJFXNAEMSXGL-UHFFFAOYSA-N	ClC1=C(Cl)C2(Cl)C3C(C(=O)OC3=O)C1(Cl)C2(Cl)Cl	ClC1=C(Cl)C2(Cl)C3C(C(=O)OC3=O)C1(Cl)C2(Cl)Cl	InChI=1/C9H2Cl6O3/c10-3-4(11)8(13)2-1(5(16)18-6(2)17)7(3,12)9(8,14)15/h1-2H	C9H2Cl6O3	370.81
DTXSID7075212	Phosphoric acid, dimethylphenyl diphenyl ester	29660-68-2	FSBFENGFYVITPO-UHFFFAOYSA-N	CC1=CC=CC(OP(=O)(OC2=CC=CC=C2)OC2=CC=CC=C2)=C1C	CC1=CC=CC(OP(=O)(OC2=CC=CC=C2)OC2=CC=CC=C2)=C1C	InChI=1S/C20H19O4P/c1-16-10-9-15-20(17(16)2)24-25(21,22-18-11-5-3-6-12-18)23-19-13-7-4-8-14-19/h3-15H,1-2H3	C20H19O4P	354.342
DTXSID5021413	Tris(2,3-dibromopropyl) phosphate	126-72-7	PQYJRMFWJJONBO-UHFFFAOYSA-N	BrCC(Br)COP(=O)(OCC(Br)CBr)OCC(Br)CBr	BrCC(Br)COP(=O)(OCC(Br)CBr)OCC(Br)CBr	InChI=1/C9H15Br6O4P/c10-1-7(13)4-17-20(16,18-5-8(14)2-11)19-6-9(15)3-12/h7-9H,1-6H2	C9H15Br6O4P	697.613
DTXSID10872795	Dimelamine monophosphate	56974-60-8	QVJYHZQHDMNONA-UHFFFAOYSA-N	OP([O-])([O-])=O.NC1=NC([NH3+])=NC(N)=N1.NC1=NC([NH3+])=NC(N)=N1	NC1=NC(N)=NC(N)=N1	InChI=1S/2C3H6N6.H3O4P/c2*4-1-7-2(5)9-3(6)8-1;1-5(2,3)4/h2*(H6,4,5,6,7,8,9);(H3,1,2,3,4)	C6H15N12O4P	350.24
DTXSID101014603	Crude natural boric acid	11113-50-1
DTXSID80879857	BDE-22	446254-15-5	WZHNIFQVNBINLF-UHFFFAOYSA-N	BrC1=CC=C(OC2=CC=CC(Br)=C2Br)C=C1	BrC1=CC=C(OC2=CC=CC(Br)=C2Br)C=C1	InChI=1S/C12H7Br3O/c13-8-4-6-9(7-5-8)16-11-3-1-2-10(14)12(11)15/h1-7H	C12H7Br3O	406.899
DTXSID301016693	Poly(tribromostyrene)	57137-10-7
DTXSID90866551	3,3',4,4',5-Pentabromo-1,1'-biphenyl	84303-46-8	DGTPXLZCUVCFEH-UHFFFAOYSA-N	BrC1=CC=C(C=C1Br)C1=CC(Br)=C(Br)C(Br)=C1	BrC1=CC=C(C=C1Br)C1=CC(Br)=C(Br)C(Br)=C1	InChI=1S/C12H5Br5/c13-8-2-1-6(3-9(8)14)7-4-10(15)12(17)11(16)5-7/h1-5H	C12H5Br5	548.692
DTXSID201016688	Piperazine, phosphate (1:x)	1951-97-9
DTXSID20879977	BDE-182	442690-45-1	ZYHDTADADSNMLV-UHFFFAOYSA-N	BrC1=CC(Br)=C(OC2=CC(Br)=C(Br)C(Br)=C2Br)C(Br)=C1	BrC1=CC(Br)=C(OC2=CC(Br)=C(Br)C(Br)=C2Br)C(Br)=C1	InChI=1S/C12H3Br7O/c13-4-1-6(15)12(7(16)2-4)20-8-3-5(14)9(17)11(19)10(8)18/h1-3H	C12H3Br7O	722.483
DTXSID10893960	Zinc molybdate(VI) (ZnMoO4)	13767-32-3	LRXWDDLGCBKJHF-UHFFFAOYSA-N	[O--].[O--].[O--].[O--].[Zn++].[Mo+6]		InChI=1S/Mo.4O.Zn/q+6;4*-2;+2	MoO4Zn	225.33
DTXSID9024641	3-Bromo-2,2-bis(bromomethyl)propanol	1522-92-5	QEJPOEGPNIVDMK-UHFFFAOYSA-N	OCC(CBr)(CBr)CBr	OCC(CBr)(CBr)CBr	InChI=1S/C5H9Br3O/c6-1-5(2-7,3-8)4-9/h9H,1-4H2	C5H9Br3O	324.838
DTXSID10218114	2,4,5,3',4'-Pentabromobiphenyl	67888-97-5	YOQVIFKWRYWBEP-UHFFFAOYSA-N	BrC1=CC(Br)=C(Br)C=C1C1=CC(Br)=C(Br)C=C1	BrC1=CC(Br)=C(Br)C=C1C1=CC(Br)=C(Br)C=C1	InChI=1S/C12H5Br5/c13-8-2-1-6(3-10(8)15)7-4-11(16)12(17)5-9(7)14/h1-5H	C12H5Br5	548.692
DTXSID301012772	Carbonic acid, diphenyl ester, polymer with diphenyl P-methylphosphonate and 4,4'-(1-methylethylidene)bis[phenol]	77226-90-5
DTXSID20152373	2,2',3,3',4,5',6,6'-Octabromobiphenyl	119264-60-7	XWEDREXJLOGPJT-UHFFFAOYSA-N	BrC1=CC(Br)=C(Br)C(=C1Br)C1=C(Br)C(Br)=C(Br)C=C1Br	BrC1=CC(Br)=C(Br)C(=C1Br)C1=C(Br)C(Br)=C(Br)C=C1Br	InChI=1S/C12H2Br8/c13-3-1-6(16)11(19)12(20)7(3)8-9(17)4(14)2-5(15)10(8)18/h1-2H	C12H2Br8	785.38
DTXSID40872768	Tetraammonium octamolybdate	12411-64-2	UZWYXNLRGMRHEW-UHFFFAOYSA-R	[NH4+].[NH4+].[NH4+].[NH4+].[O--].[O--].[O--].[O--].[O--].[O--].[O--].[O--].[O--].[O--].[O--].[O--].O=[Mo+4].O=[Mo+4].O=[Mo++]=O.O=[Mo++]=O.O=[Mo++]=O.O=[Mo++]=O.O=[Mo++]=O.O=[Mo++]=O		InChI=1S/8Mo.4H3N.26O/h;;;;;;;;4*1H3;;;;;;;;;;;;;;;;;;;;;;;;;;/q6*+2;2*+4;;;;;;;;;;;;;;;;;;;12*-2/p+4	H16Mo8N4O26	1255.73
DTXSID90879964	BDE-165	446255-16-9	KXERERDGMTWBGZ-UHFFFAOYSA-N	BrC1=CC(OC2=C(Br)C(Br)=CC(Br)=C2Br)=CC(Br)=C1	BrC1=CC(OC2=C(Br)C(Br)=CC(Br)=C2Br)=CC(Br)=C1	InChI=1S/C12H4Br6O/c13-5-1-6(14)3-7(2-5)19-12-10(17)8(15)4-9(16)11(12)18/h1-4H	C12H4Br6O	643.587
DTXSID80879978	BDE-186	446255-27-2	WUFQDCMRKKDNSF-UHFFFAOYSA-N	BrC1=CC=CC(Br)=C1OC1=C(Br)C(Br)=C(Br)C(Br)=C1Br	BrC1=CC=CC(Br)=C1OC1=C(Br)C(Br)=C(Br)C(Br)=C1Br	InChI=1S/C12H3Br7O/c13-4-2-1-3-5(14)11(4)20-12-9(18)7(16)6(15)8(17)10(12)19/h1-3H	C12H3Br7O	722.483
DTXSID4052710	2,4,4'-Tribromodiphenyl ether	41318-75-6	UPNBETHEXPIWQX-UHFFFAOYSA-N	BrC1=CC=C(OC2=C(Br)C=C(Br)C=C2)C=C1	BrC1=CC=C(OC2=C(Br)C=C(Br)C=C2)C=C1	InChI=1S/C12H7Br3O/c13-8-1-4-10(5-2-8)16-12-6-3-9(14)7-11(12)15/h1-7H	C12H7Br3O	406.899
DTXSID00955980	Bis(2,3-dibromopropyl) hydrogen phosphate--ammonia (1/1)	34432-82-1	HUNCOJQSARNBJJ-UHFFFAOYSA-N	N.OP(=O)(OCC(Br)CBr)OCC(Br)CBr	OP(=O)(OCC(Br)CBr)OCC(Br)CBr	InChI=1/C6H11Br4O4P.H3N/c7-1-5(9)3-13-15(11,12)14-4-6(10)2-8;/h5-6H,1-4H2,(H,11,12);1H3	C6H14Br4NO4P	514.771
DTXSID101017114	Boric acid (H3BO3)​, compound with 1,​3,​5-​triazine-​2,​4,​6-​triamine	53587-44-3
DTXSID9052713	1,3,5-Tris(2,3-dibromopropyl)-1,3,5-triazine-2,4,6(1H,3H,5H)-trione	52434-90-9	NZUPFZNVGSWLQC-UHFFFAOYSA-N	BrCC(Br)CN1C(=O)N(CC(Br)CBr)C(=O)N(CC(Br)CBr)C1=O	BrCC(Br)CN1C(=O)N(CC(Br)CBr)C(=O)N(CC(Br)CBr)C1=O	InChI=1/C12H15Br6N3O3/c13-1-7(16)4-19-10(22)20(5-8(17)2-14)12(24)21(11(19)23)6-9(18)3-15/h7-9H,1-6H2	C12H15Br6N3O3	728.694
DTXSID50873428	Dibutyl phenyl phosphate	2528-36-1	YICSVBJRVMLQNS-UHFFFAOYSA-N	CCCCOP(=O)(OCCCC)OC1=CC=CC=C1	CCCCOP(=O)(OCCCC)OC1=CC=CC=C1	InChI=1S/C14H23O4P/c1-3-5-12-16-19(15,17-13-6-4-2)18-14-10-8-7-9-11-14/h7-11H,3-6,12-13H2,1-2H3	C14H23O4P	286.308
DTXSID4028880	Triphenyl phosphates isopropylated	68937-41-7
DTXSID4030047	2,2',4,4',5,5'-Hexabromodiphenyl ether	68631-49-2	RZXIRSKYBISPGF-UHFFFAOYSA-N	BrC1=CC(Br)=C(OC2=CC(Br)=C(Br)C=C2Br)C=C1Br	BrC1=CC(Br)=C(OC2=CC(Br)=C(Br)C=C2Br)C=C1Br	InChI=1S/C12H4Br6O/c13-5-1-9(17)11(3-7(5)15)19-12-4-8(16)6(14)2-10(12)18/h1-4H	C12H4Br6O	643.587
DTXSID00894087	Bromkal 70	60371-14-4
DTXSID90872778	3,3'-[(2-Methylpropyl)phosphoryl]di(propan-1-ol)	147768-39-6	RBOSLVRUYBQPOX-UHFFFAOYSA-N	CC(C)CP(=O)(CCCO)CCCO	CC(C)CP(=O)(CCCO)CCCO	InChI=1S/C10H23O3P/c1-10(2)9-14(13,7-3-5-11)8-4-6-12/h10-12H,3-9H2,1-2H3	C10H23O3P	222.265
DTXSID1027134	Bis(2-ethylhexyl) phosphate	298-07-7	SEGLCEQVOFDUPX-UHFFFAOYSA-N	CCCCC(CC)COP(O)(=O)OCC(CC)CCCC	CCCCC(CC)COP(O)(=O)OCC(CC)CCCC	InChI=1/C16H35O4P/c1-5-9-11-15(7-3)13-19-21(17,18)20-14-16(8-4)12-10-6-2/h15-16H,5-14H2,1-4H3,(H,17,18)	C16H35O4P	322.426
DTXSID1091555	Calcium borate	12040-58-3
DTXSID0028903	Tar acids, cresylic, Ph phosphates	68952-35-2
DTXSID70879861	BDE-32	189084-60-4	TYDVYKIQSZGUMV-UHFFFAOYSA-N	BrC1=CC=C(OC2=C(Br)C=CC=C2Br)C=C1	BrC1=CC=C(OC2=C(Br)C=CC=C2Br)C=C1	InChI=1S/C12H7Br3O/c13-8-4-6-9(7-5-8)16-12-10(14)2-1-3-11(12)15/h1-7H	C12H7Br3O	406.899
DTXSID4052687	Benzene hexabromide	1837-91-8	QFQZKISCBJKVHI-UHFFFAOYSA-N	BrC1C(Br)C(Br)C(Br)C(Br)C1Br	BrC1C(Br)C(Br)C(Br)C(Br)C1Br	InChI=1S/C6H6Br6/c7-1-2(8)4(10)6(12)5(11)3(1)9/h1-6H	C6H6Br6	557.538
DTXSID4021391	Tris(methylphenyl) phosphate	1330-78-5
DTXSID50894315	Alkanes, C21-34-branched and linear, chloro	1417900-96-9
DTXSID50577712	1-Bromo-2-(4-bromophenoxy)benzene	147217-71-8	RJQLQJZMLISKRJ-UHFFFAOYSA-N	BrC1=CC=C(OC2=CC=CC=C2Br)C=C1	BrC1=CC=C(OC2=CC=CC=C2Br)C=C1	InChI=1S/C12H8Br2O/c13-9-5-7-10(8-6-9)15-12-4-2-1-3-11(12)14/h1-8H	C12H8Br2O	328.003
DTXSID3024861	Cresyl diphenyl phosphate	26444-49-5		C*.O=P(OC1=CC=CC=C1)(OC1=CC=CC=C1)OC1=CC=CC=C1 |c:6,8,14,16,22,24,t:4,12,20,lp:2:2,4:2,11:2,18:2,m:1:6.7.8|
DTXSID10872775	Brominated epoxy resin end-capped with tribromophenol	135229-48-0
DTXSID0052700	2,2'-[(1-Methylethylidene)bis[(2,6-dibromo-4,1-phenylene)oxymethylene]]bis[oxirane]	3072-84-2	ZJRAAAWYHORFHN-UHFFFAOYSA-N	CC(C)(C1=CC(Br)=C(OCC2CO2)C(Br)=C1)C1=CC(Br)=C(OCC2CO2)C(Br)=C1	CC(C)(C1=CC(Br)=C(OCC2CO2)C(Br)=C1)C1=CC(Br)=C(OCC2CO2)C(Br)=C1	InChI=1/C21H20Br4O4/c1-21(2,11-3-15(22)19(16(23)4-11)28-9-13-7-26-13)12-5-17(24)20(18(25)6-12)29-10-14-8-27-14/h3-6,13-14H,7-10H2,1-2H3	C21H20Br4O4	656.003
DTXSID8065660	Ammonium fluoroborate	13826-83-0	PDTKOBRZPAIMRD-UHFFFAOYSA-O	[NH4+].F[B-](F)(F)F		InChI=1S/BF4.H3N/c2-1(3,4)5;/h;1H3/q-1;/p+1	BF4H4N	104.84
DTXSID1024382	Phosphorus	7723-14-0	OAICVXFJPJFONN-UHFFFAOYSA-N	[P]		InChI=1S/P	P	30.9738
DTXSID2020688	Hexachlorocyclopentadiene	77-47-4	VUNCWTMEJYMOOR-UHFFFAOYSA-N	ClC1=C(Cl)C(Cl)(Cl)C(Cl)=C1Cl	ClC1=C(Cl)C(Cl)(Cl)C(Cl)=C1Cl	InChI=1S/C5Cl6/c6-1-2(7)4(9)5(10,11)3(1)8	C5Cl6	272.76
DTXSID80873971	BDE-171	446255-19-2	FRMMMROUUPQUMZ-UHFFFAOYSA-N	BrC1=CC(Br)=C(OC2=C(Br)C(Br)=C(Br)C=C2)C(Br)=C1Br	BrC1=CC(Br)=C(OC2=C(Br)C(Br)=C(Br)C=C2)C(Br)=C1Br	InChI=1S/C12H3Br7O/c13-4-1-2-7(10(18)8(4)16)20-12-6(15)3-5(14)9(17)11(12)19/h1-3H	C12H3Br7O	722.483
DTXSID7023805	Tris(2,3-dichloropropyl)phosphate	78-43-3	JZZBTMVTLBHJHL-UHFFFAOYSA-N	ClCC(Cl)COP(=O)(OCC(Cl)CCl)OCC(Cl)CCl	ClCC(Cl)COP(=O)(OCC(Cl)CCl)OCC(Cl)CCl	InChI=1/C9H15Cl6O4P/c10-1-7(13)4-17-20(16,18-5-8(14)2-11)19-6-9(15)3-12/h7-9H,1-6H2	C9H15Cl6O4P	430.89
DTXSID5029186	6-Methyl-1,3,5-triazine-2,4-diamine	542-02-9	NJYZCEFQAIUHSD-UHFFFAOYSA-N	CC1=NC(N)=NC(N)=N1	CC1=NC(N)=NC(N)=N1	InChI=1S/C4H7N5/c1-2-7-3(5)9-4(6)8-2/h1H3,(H4,5,6,7,8,9)	C4H7N5	125.135
DTXSID9052688	2,3',4,4'-Tetrabromodiphenyl ether	189084-61-5	DHUMTYRHKMCVAG-UHFFFAOYSA-N	BrC1=CC(Br)=C(OC2=CC(Br)=C(Br)C=C2)C=C1	BrC1=CC(Br)=C(OC2=CC(Br)=C(Br)C=C2)C=C1	InChI=1S/C12H6Br4O/c13-7-1-4-12(11(16)5-7)17-8-2-3-9(14)10(15)6-8/h1-6H	C12H6Br4O	485.795
DTXSID8040698	Triisobutyl phosphate	126-71-6	HRKAMJBPFPHCSD-UHFFFAOYSA-N	CC(C)COP(=O)(OCC(C)C)OCC(C)C	CC(C)COP(=O)(OCC(C)C)OCC(C)C	InChI=1S/C12H27O4P/c1-10(2)7-14-17(13,15-8-11(3)4)16-9-12(5)6/h10-12H,7-9H2,1-6H3	C12H27O4P	266.318
DTXSID0052750	1,2,5,6-Tetrabromocyclooctane	3194-57-8	RZLXIANUDLLFHN-UHFFFAOYSA-N	BrC1CCC(Br)C(Br)CCC1Br	BrC1CCC(Br)C(Br)CCC1Br	InChI=1/C8H12Br4/c9-5-1-2-6(10)8(12)4-3-7(5)11/h5-8H,1-4H2	C8H12Br4	427.8
DTXSID00893979	Dipotassium hexafluorozirconate(2-)	16923-95-8	BJZIJOLEWHWTJO-UHFFFAOYSA-H	[K+].[K+].F[Zr--](F)(F)(F)(F)F		InChI=1S/6FH.2K.Zr/h6*1H;;;/q;;;;;;2*+1;+4/p-6	F6K2Zr	283.411
DTXSID4061412	1,3,5-Triazine-2,4,6-triyltriiminotrimethanol	1017-56-7	USDJGQLNFPZEON-UHFFFAOYSA-N	OCNC1=NC(NCO)=NC(NCO)=N1	OCNC1=NC(NCO)=NC(NCO)=N1	InChI=1S/C6H12N6O3/c13-1-7-4-10-5(8-2-14)12-6(11-4)9-3-15/h13-15H,1-3H2,(H3,7,8,9,10,11,12)	C6H12N6O3	216.201
DTXSID10872553	Boron phosphate (B(PO4))	13308-51-5	RKVCQBPDVHFKCU-UHFFFAOYSA-N	O=P12OB(O1)O2		InChI=1S/BO4P/c2-6-3-1(4-6)5-6	BO4P	105.78
DTXSID1048207	Diphenyl phosphate	838-85-7	ASMQGLCHMVWBQR-UHFFFAOYSA-N	OP(=O)(OC1=CC=CC=C1)OC1=CC=CC=C1	OP(=O)(OC1=CC=CC=C1)OC1=CC=CC=C1	InChI=1S/C12H11O4P/c13-17(14,15-11-7-3-1-4-8-11)16-12-9-5-2-6-10-12/h1-10H,(H,13,14)	C12H11O4P	250.19
DTXSID10879865	BDE-38	337513-54-9	DPGVQKLGQZZLMI-UHFFFAOYSA-N	BrC1=CC(OC2=CC=CC=C2)=CC(Br)=C1Br	BrC1=CC(OC2=CC=CC=C2)=CC(Br)=C1Br	InChI=1S/C12H7Br3O/c13-10-6-9(7-11(14)12(10)15)16-8-4-2-1-3-5-8/h1-7H	C12H7Br3O	406.899
DTXSID1074597	Phosphoric acid, trihexyl ester	2528-39-4	SFENPMLASUEABX-UHFFFAOYSA-N	CCCCCCOP(=O)(OCCCCCC)OCCCCCC	CCCCCCOP(=O)(OCCCCCC)OCCCCCC	InChI=1S/C18H39O4P/c1-4-7-10-13-16-20-23(19,21-17-14-11-8-5-2)22-18-15-12-9-6-3/h4-18H2,1-3H3	C18H39O4P	350.48
DTXSID40879959	BDE-160	446255-11-4	OCVOYHGOXIIONK-UHFFFAOYSA-N	BrC1=CC=CC(OC2=C(Br)C(Br)=C(Br)C(Br)=C2Br)=C1	BrC1=CC=CC(OC2=C(Br)C(Br)=C(Br)C(Br)=C2Br)=C1	InChI=1S/C12H4Br6O/c13-5-2-1-3-6(4-5)19-12-10(17)8(15)7(14)9(16)11(12)18/h1-4H	C12H4Br6O	643.587
DTXSID90871387	Tris(1,3-dichloropropyl)phosphate	40120-74-9	DHNUXDYAOVSGII-UHFFFAOYSA-N	ClCCC(Cl)OP(=O)(OC(Cl)CCCl)OC(Cl)CCCl	ClCCC(Cl)OP(=O)(OC(Cl)CCCl)OC(Cl)CCCl	InChI=1/C9H15Cl6O4P/c10-4-1-7(13)17-20(16,18-8(14)2-5-11)19-9(15)3-6-12/h7-9H,1-6H2	C9H15Cl6O4P	430.89
DTXSID10879901	BDE-84	446254-52-0	PPIZNRAVQHNLJM-UHFFFAOYSA-N	BrC1=CC=C(Br)C(OC2=CC=CC(Br)=C2Br)=C1Br	BrC1=CC=C(Br)C(OC2=CC=CC(Br)=C2Br)=C1Br	InChI=1S/C12H5Br5O/c13-6-2-1-3-9(10(6)16)18-12-8(15)5-4-7(14)11(12)17/h1-5H	C12H5Br5O	564.691
DTXSID30105330	Benzene, ethenyl-, homopolymer, brominated	88497-56-7
DTXSID6068854	Diethylene glycol bis[bis(2-chloroethyl)phosphate]	53461-82-8	BKPSPVSDCLSBBK-UHFFFAOYSA-N	ClCCOP(=O)(OCCCl)OCCOCCOP(=O)(OCCCl)OCCCl	ClCCOP(=O)(OCCCl)OCCOCCOP(=O)(OCCCl)OCCCl	InChI=1S/C12H24Cl4O9P2/c13-1-5-20-26(17,21-6-2-14)24-11-9-19-10-12-25-27(18,22-7-3-15)23-8-4-16/h1-12H2	C12H24Cl4O9P2	516.06
DTXSID70867243	Bis(p-acryloxyethoxy)tetrabromobisphenol A	66710-97-2	OOGPFCFGQOSOOZ-UHFFFAOYSA-N	CC(C)(C1=CC(Br)=C(OCCOC(=O)C=C)C(Br)=C1)C1=CC(Br)=C(OCCOC(=O)C=C)C(Br)=C1	CC(C)(C1=CC(Br)=C(OCCOC(=O)C=C)C(Br)=C1)C1=CC(Br)=C(OCCOC(=O)C=C)C(Br)=C1	InChI=1S/C25H24Br4O6/c1-5-21(30)32-7-9-34-23-17(26)11-15(12-18(23)27)25(3,4)16-13-19(28)24(20(29)14-16)35-10-8-33-22(31)6-2/h5-6,11-14H,1-2,7-10H2,3-4H3	C25H24Br4O6	740.077
DTXSID3028269	Bis(tert-butylphenyl)phenyl phosphate	65652-41-7
DTXSID90879909	BDE-94	446254-61-1	JOPASNJHCFYVHD-UHFFFAOYSA-N	BrC1=CC(Br)=C(Br)C(OC2=C(Br)C=CC=C2Br)=C1	BrC1=CC(Br)=C(Br)C(OC2=C(Br)C=CC=C2Br)=C1	InChI=1S/C12H5Br5O/c13-6-4-9(16)11(17)10(5-6)18-12-7(14)2-1-3-8(12)15/h1-5H	C12H5Br5O	564.691
DTXSID50879925	BDE-113	446254-76-8	OGZHLJXRGZFVLI-UHFFFAOYSA-N	BrC1=CC(OC2=C(Br)C=CC(Br)=C2Br)=CC(Br)=C1	BrC1=CC(OC2=C(Br)C=CC(Br)=C2Br)=CC(Br)=C1	InChI=1S/C12H5Br5O/c13-6-3-7(14)5-8(4-6)18-12-10(16)2-1-9(15)11(12)17/h1-5H	C12H5Br5O	564.691
DTXSID8026228	Triethyl phosphate	78-40-0	DQWPFSLDHJDLRL-UHFFFAOYSA-N	CCOP(=O)(OCC)OCC	CCOP(=O)(OCC)OCC	InChI=1S/C6H15O4P/c1-4-8-11(7,9-5-2)10-6-3/h4-6H2,1-3H3	C6H15O4P	182.156
DTXSID00879910	BDE-95	446254-62-2	BZDYRALIEYVMEP-UHFFFAOYSA-N	BrC1=CC(OC2=C(Br)C=CC(Br)=C2Br)=C(Br)C=C1	BrC1=CC(OC2=C(Br)C=CC(Br)=C2Br)=C(Br)C=C1	InChI=1S/C12H5Br5O/c13-6-1-2-7(14)10(5-6)18-12-9(16)4-3-8(15)11(12)17/h1-5H	C12H5Br5O	564.691
DTXSID9051589	Bis(2-chloroethyl) vinylphosphonate	115-98-0	LHHMNJZNWUJFOC-UHFFFAOYSA-N	ClCCOP(=O)(OCCCl)C=C	ClCCOP(=O)(OCCCl)C=C	InChI=1S/C6H11Cl2O3P/c1-2-12(9,10-5-3-7)11-6-4-8/h2H,1,3-6H2	C6H11Cl2O3P	233.02
DTXSID50879889	2,4-Dibromo-1-(3,5-dibromophenoxy)benzene	446254-38-2	UFWGRLCUOLLWAO-UHFFFAOYSA-N	BrC1=CC=C(OC2=CC(Br)=CC(Br)=C2)C(Br)=C1	BrC1=CC=C(OC2=CC(Br)=CC(Br)=C2)C(Br)=C1	InChI=1S/C12H6Br4O/c13-7-1-2-12(11(16)6-7)17-10-4-8(14)3-9(15)5-10/h1-6H	C12H6Br4O	485.795
DTXSID30785570	1,2,4-Tribromo-5-(3,5-dibromophenoxy)benzene	417727-71-0	AKSBEUHDCRZJAN-UHFFFAOYSA-N	BrC1=CC(OC2=CC(Br)=C(Br)C=C2Br)=CC(Br)=C1	BrC1=CC(OC2=CC(Br)=C(Br)C=C2Br)=CC(Br)=C1	InChI=1S/C12H5Br5O/c13-6-1-7(14)3-8(2-6)18-12-5-10(16)9(15)4-11(12)17/h1-5H	C12H5Br5O	564.691
DTXSID9040213	Tris(hydroxymethyl)phosphine oxide	1067-12-5	MRVZORUPSXTRHD-UHFFFAOYSA-N	OCP(=O)(CO)CO	OCP(=O)(CO)CO	InChI=1S/C3H9O4P/c4-1-8(7,2-5)3-6/h4-6H,1-3H2	C3H9O4P	140.075
DTXSID2071867	Heptabromodiphenyl ether	68928-80-3		[*]C1=C([*])C([*])=C(OC2=C([*])C([*])=C([*])C([*])=C2[*])C([*])=C1[*] |$_R1;;;_R1;;_R1;;;;;_R1;;_R1;;_R1;;_R1;;_R1;;_R1;;_R1$,c:1,8,16,21,t:5,12,lp:7:2,RG:_R1={Br* |$;_AP1$,lp:0:3|},LOG={_R1:;H;7}|			C12O	160.131
DTXSID7026102	Tetrachlorophthalic anhydride	117-08-8	AUHHYELHRWCWEZ-UHFFFAOYSA-N	ClC1=C2C(=O)OC(=O)C2=C(Cl)C(Cl)=C1Cl	ClC1=C2C(=O)OC(=O)C2=C(Cl)C(Cl)=C1Cl	InChI=1S/C8Cl4O3/c9-3-1-2(8(14)15-7(1)13)4(10)6(12)5(3)11	C8Cl4O3	285.89
DTXSID00181969	Ethanol, 2-bromo-, phosphate (3:1)	27568-90-7	FFULTTXGZNPTQO-UHFFFAOYSA-N	BrCCOP(=O)(OCCBr)OCCBr	BrCCOP(=O)(OCCBr)OCCBr	InChI=1S/C6H12Br3O4P/c7-1-4-11-14(10,12-5-2-8)13-6-3-9/h1-6H2	C6H12Br3O4P	418.844
DTXSID8024236	Octabromodiphenyl ether	32536-52-0		[*]C1=C([*])C([*])=C(OC2=C([*])C([*])=C([*])C([*])=C2[*])C([*])=C1[*] |$_R1;;;_R1;;_R1;;;;;_R1;;_R1;;_R1;;_R1;;_R1;;_R1;;_R1$,c:1,8,16,21,t:5,12,lp:7:2,RG:_R1={Br* |$;_AP1$,lp:0:2|},LOG={_R1:;H;8}|
DTXSID1068859	Propanenitrile, 3,3',3'',3'''-[(2,3,5,6-tetramethyl-1,4-phenylene)bis(methylenephosphinylidyne)]tetrakis-	53506-00-6	OCZHPWXKKUFLNW-UHFFFAOYSA-N	CC1=C(C)C(CP(=O)(CCC#N)CCC#N)=C(C)C(C)=C1CP(=O)(CCC#N)CCC#N	CC1=C(C)C(CP(=O)(CCC#N)CCC#N)=C(C)C(C)=C1CP(=O)(CCC#N)CCC#N	InChI=1S/C24H32N4O2P2/c1-19-20(2)24(18-32(30,15-7-11-27)16-8-12-28)22(4)21(3)23(19)17-31(29,13-5-9-25)14-6-10-26/h5-8,13-18H2,1-4H3	C24H32N4O2P2	470.494
DTXSID60108450	Phosphoric acid, P,P'-1,3-phenylene P,P,P',P'-tetrakis(2,6-dimethylphenyl) ester	139189-30-3	YOLFSLXHLNWPKG-UHFFFAOYSA-N	CC1=CC=CC(C)=C1OP(=O)(OC1=CC(OP(=O)(OC2=C(C)C=CC=C2C)OC2=C(C)C=CC=C2C)=CC=C1)OC1=C(C)C=CC=C1C	CC1=CC=CC(C)=C1OP(=O)(OC1=CC(OP(=O)(OC2=C(C)C=CC=C2C)OC2=C(C)C=CC=C2C)=CC=C1)OC1=C(C)C=CC=C1C	InChI=1S/C38H40O8P2/c1-25-14-9-15-26(2)35(25)43-47(39,44-36-27(3)16-10-17-28(36)4)41-33-22-13-23-34(24-33)42-48(40,45-37-29(5)18-11-19-30(37)6)46-38-31(7)20-12-21-32(38)8/h9-24H,1-8H3	C38H40O8P2	686.678
DTXSID401012399	2-Butyne-1,4-diol, polymer with 2-(chloromethyl)oxirane, brominated, dehydrochlorinated, methoxylated	68441-62-3
DTXSID90884159	Propanoic acid, 2-bromo-, methyl ester	5445-17-0	ACEONLNNWKIPTM-UHFFFAOYSA-N	COC(=O)C(C)Br	COC(=O)C(C)Br	InChI=1/C4H7BrO2/c1-3(5)4(6)7-2/h3H,1-2H3	C4H7BrO2	167.002
DTXSID8029363	(5-Ethyl-2-methyl-1,3,2-dioxaphosphorinan-5-yl)methyl dimethyl phosphonate P-oxide	41203-81-0	CFIFBLCPLCPITL-UHFFFAOYSA-N	CCC1(COP(C)(=O)OC)COP(C)(=O)OC1	CCC1(COP(C)(=O)OC)COP(C)(=O)OC1	InChI=1/C9H20O6P2/c1-5-9(6-13-16(3,10)12-2)7-14-17(4,11)15-8-9/h5-8H2,1-4H3	C9H20O6P2	286.201
DTXSID00957040	Tris(2-bromo-4-methylphenyl) phosphate	35656-01-0	XVHSMXGREZXJKN-UHFFFAOYSA-N	CC1=CC(Br)=C(OP(=O)(OC2=C(Br)C=C(C)C=C2)OC2=C(Br)C=C(C)C=C2)C=C1	CC1=CC(Br)=C(OP(=O)(OC2=C(Br)C=C(C)C=C2)OC2=C(Br)C=C(C)C=C2)C=C1	InChI=1S/C21H18Br3O4P/c1-13-4-7-19(16(22)10-13)26-29(25,27-20-8-5-14(2)11-17(20)23)28-21-9-6-15(3)12-18(21)24/h4-12H,1-3H3	C21H18Br3O4P	605.057
DTXSID70190063	Bis(thiopyrophosphoric acid)	36558-41-5	CIFZCCWGXMYJEU-UHFFFAOYSA-N	OP(O)(=S)OP(O)(O)=S		InChI=1S/H4O5P2S2/c1-6(2,8)5-7(3,4)9/h(H2,1,2,8)(H2,3,4,9)	H4O5P2S2	210.09
DTXSID5027980	Phosphoric acid, 1,2-ethanediyl tetrakis(2-chloroethyl) ester	33125-86-9	CJWBPEYRTPGWPF-UHFFFAOYSA-N	ClCCOP(=O)(OCCCl)OCCOP(=O)(OCCCl)OCCCl	ClCCOP(=O)(OCCCl)OCCOP(=O)(OCCCl)OCCCl	InChI=1S/C10H20Cl4O8P2/c11-1-5-17-23(15,18-6-2-12)21-9-10-22-24(16,19-7-3-13)20-8-4-14/h1-10H2	C10H20Cl4O8P2	472.01
DTXSID7024873	Cyanuric acid	108-80-5	ZFSLODLOARCGLH-UHFFFAOYSA-N	OC1=NC(O)=NC(O)=N1	OC1=NC(O)=NC(O)=N1	InChI=1S/C3H3N3O3/c7-1-4-2(8)6-3(9)5-1/h(H3,4,5,6,7,8,9)	C3H3N3O3	129.075
DTXSID1021952	Triphenyl phosphate	115-86-6	XZZNDPSIHUTMOC-UHFFFAOYSA-N	O=P(OC1=CC=CC=C1)(OC1=CC=CC=C1)OC1=CC=CC=C1	O=P(OC1=CC=CC=C1)(OC1=CC=CC=C1)OC1=CC=CC=C1	InChI=1S/C18H15O4P/c19-23(20-16-10-4-1-5-11-16,21-17-12-6-2-7-13-17)22-18-14-8-3-9-15-18/h1-15H	C18H15O4P	326.288
DTXSID70849024	Bis[(pentabromophenyl)methyl] benzene-1,4-dicarboxylate	90075-91-5	HLVCXDICWMLXBH-UHFFFAOYSA-N	BrC1=C(Br)C(Br)=C(COC(=O)C2=CC=C(C=C2)C(=O)OCC2=C(Br)C(Br)=C(Br)C(Br)=C2Br)C(Br)=C1Br	BrC1=C(Br)C(Br)=C(COC(=O)C2=CC=C(C=C2)C(=O)OCC2=C(Br)C(Br)=C(Br)C(Br)=C2Br)C(Br)=C1Br	InChI=1S/C22H8Br10O4/c23-11-9(12(24)16(28)19(31)15(11)27)5-35-21(33)7-1-2-8(4-3-7)22(34)36-6-10-13(25)17(29)20(32)18(30)14(10)26/h1-4H,5-6H2	C22H8Br10O4	1135.34
DTXSID3044918	1,3,5-Tribromo-2-(prop-2-en-1-yloxy)benzene	3278-89-5	RZLLIOPGUFOWOD-UHFFFAOYSA-N	BrC1=CC(Br)=C(OCC=C)C(Br)=C1	BrC1=CC(Br)=C(OCC=C)C(Br)=C1	InChI=1S/C9H7Br3O/c1-2-3-13-9-7(11)4-6(10)5-8(9)12/h2,4-5H,1,3H2	C9H7Br3O	370.866
DTXSID0049814	Vinyl acetate ethylene copolymer	24937-78-8
DTXSID1029677	Silica	7631-86-9	VYPSYNLAJGMNEJ-UHFFFAOYSA-N	O=[Si]=O		InChI=1S/O2Si/c1-3-2	O2Si	60.083
DTXSID701016671	(+)-gamma-Hexabromocyclododecane	678970-17-7	DEIGXXQKDWULML-MOCCIAMBSA-N	Br[C@H]1CC[C@H](Br)[C@H](Br)CC[C@@H](Br)[C@H](Br)CC[C@H]1Br	BrC1CCC(Br)C(Br)CCC(Br)C(Br)CCC1Br,Br[C@H]1CC[C@H](Br)[C@H](Br)CC[C@@H](Br)[C@H](Br)CC[C@H]1Br	InChI=1S/C12H18Br6/c13-7-1-2-8(14)10(16)5-6-12(18)11(17)4-3-9(7)15/h7-12H,1-6H2/t7-,8-,9-,10+,11-,12+/m1/s1	C12H18Br6	641.7
DTXSID80879918	BDE-106	446254-69-9	KLQKWMYXEWUAFP-UHFFFAOYSA-N	BrC1=CC=CC(OC2=CC(Br)=C(Br)C(Br)=C2Br)=C1	BrC1=CC=CC(OC2=CC(Br)=C(Br)C(Br)=C2Br)=C1	InChI=1S/C12H5Br5O/c13-6-2-1-3-7(4-6)18-9-5-8(14)10(15)12(17)11(9)16/h1-5H	C12H5Br5O	564.691
DTXSID1029049	Tetrabromophthalic acid mixed esters with diethylene glycol and propylene glycol	77098-07-8
DTXSID70881106	1,2,3-Tribromo-4-(2,3,5-tribromophenoxy)benzene	446254-88-2	YURCHLXPAGSJHU-UHFFFAOYSA-N	BrC1=CC(OC2=CC=C(Br)C(Br)=C2Br)=C(Br)C(Br)=C1	BrC1=CC(OC2=CC=C(Br)C(Br)=C2Br)=C(Br)C(Br)=C1	InChI=1S/C12H4Br6O/c13-5-3-7(15)10(16)9(4-5)19-8-2-1-6(14)11(17)12(8)18/h1-4H	C12H4Br6O	643.587
DTXSID4023880	Antimony trioxide	1309-64-4	ADCOVFLJGNWWNZ-UHFFFAOYSA-N	O=[Sb]O[Sb]=O		InChI=1S/3O.2Sb	O3Sb2	291.517
DTXSID8065824	1,2-Ethanediamine, phosphate	14852-17-6
DTXSID2074110	2-tert-Butylphenyl diphenyl phosphate	83242-23-3	VDIFKDMFGPIVCQ-UHFFFAOYSA-N	CC(C)(C)C1=C(OP(=O)(OC2=CC=CC=C2)OC2=CC=CC=C2)C=CC=C1	CC(C)(C)C1=C(OP(=O)(OC2=CC=CC=C2)OC2=CC=CC=C2)C=CC=C1	InChI=1S/C22H23O4P/c1-22(2,3)20-16-10-11-17-21(20)26-27(23,24-18-12-6-4-7-13-18)25-19-14-8-5-9-15-19/h4-17H,1-3H3	C22H23O4P	382.396
DTXSID40872667	Alkanes, C16-27, chloro	84776-07-8
DTXSID60879850	BDE-4	51452-87-0	JMSKYMHFNWGUJG-UHFFFAOYSA-N	BrC1=CC=CC=C1OC1=C(Br)C=CC=C1	BrC1=CC=CC=C1OC1=C(Br)C=CC=C1	InChI=1S/C12H8Br2O/c13-9-5-1-3-7-11(9)15-12-8-4-2-6-10(12)14/h1-8H	C12H8Br2O	328.003
DTXSID20872781	Tetrakis(hydroxymethyl)phosphonium tetraphenylborate-tetraacetate	15652-65-0	DHEUUIFIKCBBBC-UHFFFAOYSA-N	CC(=O)OC[P+](COC(C)=O)(COC(C)=O)COC(C)=O.C1=CC=C(C=C1)[B-](C1=CC=CC=C1)(C1=CC=CC=C1)C1=CC=CC=C1		InChI=1S/C24H20B.C12H20O8P/c1-5-13-21(14-6-1)25(22-15-7-2-8-16-22,23-17-9-3-10-18-23)24-19-11-4-12-20-24;1-9(13)17-5-21(6-18-10(2)14,7-19-11(3)15)8-20-12(4)16/h1-20H;5-8H2,1-4H3/q-1;+1	C36H40BO8P	642.49
DTXSID9065572	Decabromodiphenyl	13654-09-6	AQPHBYQUCKHJLT-UHFFFAOYSA-N	BrC1=C(Br)C(Br)=C(C(Br)=C1Br)C1=C(Br)C(Br)=C(Br)C(Br)=C1Br	BrC1=C(Br)C(Br)=C(C(Br)=C1Br)C1=C(Br)C(Br)=C(Br)C(Br)=C1Br	InChI=1S/C12Br10/c13-3-1(4(14)8(18)11(21)7(3)17)2-5(15)9(19)12(22)10(20)6(2)16	C12Br10	943.172
DTXSID5065196	Zinc stannate(IV)	12036-37-2	BNEMLSQAJOPTGK-UHFFFAOYSA-N	[Zn++].[O-][Sn]([O-])=O		InChI=1S/3O.Sn.Zn/q;2*-1;;+2	O3SnZn	232.09
DTXSID9052686	2-Ethylhexyl 2,3,4,5-tetrabromobenzoate	183658-27-7	HVDXCGSGEQKWGB-UHFFFAOYSA-N	CCCCC(CC)COC(=O)C1=C(Br)C(Br)=C(Br)C(Br)=C1	CCCCC(CC)COC(=O)C1=C(Br)C(Br)=C(Br)C(Br)=C1	InChI=1/C15H18Br4O2/c1-3-5-6-9(4-2)8-21-15(20)10-7-11(16)13(18)14(19)12(10)17/h7,9H,3-6,8H2,1-2H3	C15H18Br4O2	549.923
DTXSID50881109	Tribromodiphenyl ether	49690-94-0		[*]C1=C([*])C([*])=C(OC2=C([*])C([*])=C([*])C([*])=C2[*])C([*])=C1[*] |$_R1;;;_R1;;_R1;;;;;_R1;;_R1;;_R1;;_R1;;_R1;;_R1;;_R1$,c:1,8,16,21,t:5,12,lp:7:2,RG:_R1={Br* |$;_AP1$,lp:0:2|},LOG={_R1:;H;3}|
DTXSID30879943	BDE-140	243982-83-4	FLRODCDHJZNIGA-UHFFFAOYSA-N	BrC1=CC(Br)=C(OC2=C(Br)C(Br)=C(Br)C=C2)C(Br)=C1	BrC1=CC(Br)=C(OC2=C(Br)C(Br)=C(Br)C=C2)C(Br)=C1	InChI=1S/C12H4Br6O/c13-5-3-7(15)12(8(16)4-5)19-9-2-1-6(14)10(17)11(9)18/h1-4H	C12H4Br6O	643.587
DTXSID90785697	1,2,3,4,5-Pentabromo-6-(3,5-dibromophenoxy)benzene	407578-53-4	ABLZOLAUBUSUHT-UHFFFAOYSA-N	BrC1=CC(OC2=C(Br)C(Br)=C(Br)C(Br)=C2Br)=CC(Br)=C1	BrC1=CC(OC2=C(Br)C(Br)=C(Br)C(Br)=C2Br)=CC(Br)=C1	InChI=1S/C12H3Br7O/c13-4-1-5(14)3-6(2-4)20-12-10(18)8(16)7(15)9(17)11(12)19/h1-3H	C12H3Br7O	722.483
DTXSID4074776	PBDE 205	446255-56-7	CVMKCYDBEYHNBM-UHFFFAOYSA-N	BrC1=CC(OC2=C(Br)C(Br)=C(Br)C(Br)=C2Br)=CC(Br)=C1Br	BrC1=CC(OC2=C(Br)C(Br)=C(Br)C(Br)=C2Br)=CC(Br)=C1Br	InChI=1S/C12H2Br8O/c13-4-1-3(2-5(14)6(4)15)21-12-10(19)8(17)7(16)9(18)11(12)20/h1-2H	C12H2Br8O	801.379
DTXSID60162597	2,3,4,6-Tetrabromophenol	14400-94-3	CXPJZISGVIVNEL-UHFFFAOYSA-N	OC1=C(Br)C(Br)=C(Br)C=C1Br	OC1=C(Br)C(Br)=C(Br)C=C1Br	InChI=1S/C6H2Br4O/c7-2-1-3(8)6(11)5(10)4(2)9/h1,11H	C6H2Br4O	409.697
DTXSID1052531	Calcium phosphinate	7789-79-9	LITFOGPYONJRNO-UHFFFAOYSA-L	[Ca++].[O-]P=O.[O-]P=O		InChI=1S/Ca.2HO2P/c;2*1-3-2/h;2*(H,1,2)/q+2;;/p-2	CaO4P2	166.022
DTXSID40103802	Alkanes, C12-13, chloro	71011-12-6
DTXSID70760588	4-Bromo-2-chlorobutyl 3-bromo-2,2-dimethylpropyl phosphate	98923-48-9	BMKHRICOURPBDR-UHFFFAOYSA-M	CC(C)(CBr)COP([O-])(=O)OCC(Cl)CCBr	CC(C)(CBr)COP(O)(=O)OCC(Cl)CCBr	InChI=1S/C9H18Br2ClO4P/c1-9(2,6-11)7-16-17(13,14)15-5-8(12)3-4-10/h8H,3-7H2,1-2H3,(H,13,14)/p-1	C9H17Br2ClO4P	415.46
DTXSID5063071	Allyl pentabromophenyl ether	3555-11-1	VCNJVIWFSMCZPE-UHFFFAOYSA-N	BrC1=C(Br)C(Br)=C(OCC=C)C(Br)=C1Br	BrC1=C(Br)C(Br)=C(OCC=C)C(Br)=C1Br	InChI=1S/C9H5Br5O/c1-2-3-15-9-7(13)5(11)4(10)6(12)8(9)14/h2H,1,3H2	C9H5Br5O	528.658
DTXSID601017119	Tetrakis(hydroxymethyl)phosphonium acetate-phosphate (1:1)	62588-94-7	CYURSLQEAYHIHR-UHFFFAOYSA-L	CC([O-])=O.OP(O)([O-])=O.OC[P+](CO)(CO)CO.OC[P+](CO)(CO)CO	OCP(CO)(CO)CO	InChI=1S/2C4H12O4P.C2H4O2.H3O4P/c2*5-1-9(2-6,3-7)4-8;1-2(3)4;1-5(2,3)4/h2*5-8H,1-4H2;1H3,(H,3,4);(H3,1,2,3,4)/q2*+1;;/p-2	C10H29O14P3	466.249
DTXSID30860639	2,3,4,5,6,8-Hexachlorodecane	1852481-27-6	GJGHBJCMOWRRSZ-UHFFFAOYSA-N	CCC(Cl)CC(Cl)C(Cl)C(Cl)C(Cl)C(C)Cl	CCC(Cl)CC(Cl)C(Cl)C(Cl)C(Cl)C(C)Cl	InChI=1/C10H16Cl6/c1-3-6(12)4-7(13)9(15)10(16)8(14)5(2)11/h5-10H,3-4H2,1-2H3	C10H16Cl6	348.94
DTXSID20872766	Ethylenebis[tris(2-cyanoethyl)phosphonium bromide]	10310-38-0	ASPCPFMPVFIZFT-UHFFFAOYSA-L	[Br-].[Br-].N#CCC[P+](CCC#N)(CCC#N)CC[P+](CCC#N)(CCC#N)CCC#N	N#CCCP(CCC#N)(CCC#N)CCP(CCC#N)(CCC#N)CCC#N	InChI=1S/C20H28N6P2.2BrH/c21-7-1-13-27(14-2-8-22,15-3-9-23)19-20-28(16-4-10-24,17-5-11-25)18-6-12-26;;/h1-6,13-20H2;2*1H/q+2;;/p-2	C20H28Br2N6P2	574.242
DTXSID3052698	Tripentyl phosphate	2528-38-3	QJAVUVZBMMXBRO-UHFFFAOYSA-N	CCCCCOP(=O)(OCCCCC)OCCCCC	CCCCCOP(=O)(OCCCCC)OCCCCC	InChI=1S/C15H33O4P/c1-4-7-10-13-17-20(16,18-14-11-8-5-2)19-15-12-9-6-3/h4-15H2,1-3H3	C15H33O4P	308.399
DTXSID701016702	N-2,3-Dibromopropyl-4,5-dibromohexahydrophthalimide	93202-89-2	PTOFYLCZJJRQPO-UHFFFAOYSA-N	BrCC(Br)CN1C(=O)C2CC(Br)C(Br)CC2C1=O	BrCC(Br)CN1C(=O)C2CC(Br)C(Br)CC2C1=O	InChI=1/C11H13Br4NO2/c12-3-5(13)4-16-10(17)6-1-8(14)9(15)2-7(6)11(16)18/h5-9H,1-4H2	C11H13Br4NO2	510.846
DTXSID70885508	1-Pentanone, 2,3,4,5-tetrabromo-1,5-diphenyl-	31611-84-4	QADMPPHLZUFHDS-UHFFFAOYSA-N	BrC(C(Br)C(Br)C1=CC=CC=C1)C(Br)C(=O)C1=CC=CC=C1	BrC(C(Br)C(Br)C1=CC=CC=C1)C(Br)C(=O)C1=CC=CC=C1	InChI=1/C17H14Br4O/c18-13(11-7-3-1-4-8-11)14(19)15(20)16(21)17(22)12-9-5-2-6-10-12/h1-10,13-16H	C17H14Br4O	553.914
DTXSID90879949	BDE-146	446255-02-3	HGXPYDNHBUCRTR-UHFFFAOYSA-N	BrC1=CC(Br)=C(Br)C(OC2=C(Br)C=C(Br)C(Br)=C2)=C1	BrC1=CC(Br)=C(Br)C(OC2=C(Br)C=C(Br)C(Br)=C2)=C1	InChI=1S/C12H4Br6O/c13-5-1-9(17)12(18)11(2-5)19-10-4-7(15)6(14)3-8(10)16/h1-4H	C12H4Br6O	643.587
DTXSID1020142	6-Phenyl-1,3,5-triazine-2,4-diamine	91-76-9	GZVHEAJQGPRDLQ-UHFFFAOYSA-N	NC1=NC(=NC(N)=N1)C1=CC=CC=C1	NC1=NC(=NC(N)=N1)C1=CC=CC=C1	InChI=1S/C9H9N5/c10-8-12-7(13-9(11)14-8)6-4-2-1-3-5-6/h1-5H,(H4,10,11,12,13,14)	C9H9N5	187.206
DTXSID5020235	Calcium chloride	10043-52-4	UXVMQQNJUSDDNG-UHFFFAOYSA-L	[Cl-].[Cl-].[Ca++]		InChI=1S/Ca.2ClH/h;2*1H/q+2;;/p-2	CaCl2	110.98
DTXSID5028873	Alkanes, C6-18, chloro	68920-70-7
DTXSID8069197	Tetraphenyl m-phenylene bis(phosphate)	57583-54-7	OWICEWMBIBPFAH-UHFFFAOYSA-N	O=P(OC1=CC=CC=C1)(OC1=CC=CC=C1)OC1=CC(OP(=O)(OC2=CC=CC=C2)OC2=CC=CC=C2)=CC=C1	O=P(OC1=CC=CC=C1)(OC1=CC=CC=C1)OC1=CC(OP(=O)(OC2=CC=CC=C2)OC2=CC=CC=C2)=CC=C1	InChI=1S/C30H24O8P2/c31-39(33-25-14-5-1-6-15-25,34-26-16-7-2-8-17-26)37-29-22-13-23-30(24-29)38-40(32,35-27-18-9-3-10-19-27)36-28-20-11-4-12-21-28/h1-24H	C30H24O8P2	574.462
DTXSID3025833	Pentabromotoluene	87-83-2	OZHJEQVYCBTHJT-UHFFFAOYSA-N	CC1=C(Br)C(Br)=C(Br)C(Br)=C1Br	CC1=C(Br)C(Br)=C(Br)C(Br)=C1Br	InChI=1S/C7H3Br5/c1-2-3(8)5(10)7(12)6(11)4(2)9/h1H3	C7H3Br5	486.621
DTXSID7021782	2,3,4,5,6-Pentabromoethylbenzene	85-22-3	FIAXCDIQXHJNIX-UHFFFAOYSA-N	CCC1=C(Br)C(Br)=C(Br)C(Br)=C1Br	CCC1=C(Br)C(Br)=C(Br)C(Br)=C1Br	InChI=1S/C8H5Br5/c1-2-3-4(9)6(11)8(13)7(12)5(3)10/h2H2,1H3	C8H5Br5	500.648
DTXSID80548894	1,2,3,4,5-Pentabromo-6-phenoxybenzene	189084-65-9	ACRQLFSHISNWRY-UHFFFAOYSA-N	BrC1=C(Br)C(Br)=C(OC2=CC=CC=C2)C(Br)=C1Br	BrC1=C(Br)C(Br)=C(OC2=CC=CC=C2)C(Br)=C1Br	InChI=1S/C12H5Br5O/c13-7-8(14)10(16)12(11(17)9(7)15)18-6-4-2-1-3-5-6/h1-5H	C12H5Br5O	564.691
DTXSID80877030	BDE-77	93703-48-1	RYGLOWMCGZHYRQ-UHFFFAOYSA-N	BrC1=C(Br)C=C(OC2=CC(Br)=C(Br)C=C2)C=C1	BrC1=C(Br)C=C(OC2=CC(Br)=C(Br)C=C2)C=C1	InChI=1S/C12H6Br4O/c13-9-3-1-7(5-11(9)15)17-8-2-4-10(14)12(16)6-8/h1-6H	C12H6Br4O	485.795
DTXSID70563233	1,2,3,4-Tetrabromo-2,3-dimethylbutane	24173-07-7	LVYRCENOVAOQOQ-UHFFFAOYSA-N	CC(Br)(CBr)C(C)(Br)CBr	CC(Br)(CBr)C(C)(Br)CBr,CC(Br)(CBr)C(C)(Br)CBr	InChI=1S/C6H10Br4/c1-5(9,3-7)6(2,10)4-8/h3-4H2,1-2H3	C6H10Br4	401.762
DTXSID3021986	Tributyl phosphate	126-73-8	STCOOQWBFONSKY-UHFFFAOYSA-N	CCCCOP(=O)(OCCCC)OCCCC	CCCCOP(=O)(OCCCC)OCCCC	InChI=1S/C12H27O4P/c1-4-7-10-14-17(13,15-11-8-5-2)16-12-9-6-3/h4-12H2,1-3H3	C12H27O4P	266.318
DTXSID00879859	BDE-24	218304-36-0	GFLRHBRMAZDOIG-UHFFFAOYSA-N	BrC1=C(Br)C(OC2=CC=CC=C2)=C(Br)C=C1	BrC1=C(Br)C(OC2=CC=CC=C2)=C(Br)C=C1	InChI=1S/C12H7Br3O/c13-9-6-7-10(14)12(11(9)15)16-8-4-2-1-3-5-8/h1-7H	C12H7Br3O	406.899
DTXSID50950561	Tris(2,4-dibromophenyl) phosphate	2788-11-6	OZEDYCTUPMFWEP-UHFFFAOYSA-N	BrC1=CC(Br)=C(OP(=O)(OC2=C(Br)C=C(Br)C=C2)OC2=C(Br)C=C(Br)C=C2)C=C1	BrC1=CC(Br)=C(OP(=O)(OC2=C(Br)C=C(Br)C=C2)OC2=C(Br)C=C(Br)C=C2)C=C1	InChI=1S/C18H9Br6O4P/c19-10-1-4-16(13(22)7-10)26-29(25,27-17-5-2-11(20)8-14(17)23)28-18-6-3-12(21)9-15(18)24/h1-9H	C18H9Br6O4P	799.664
DTXSID10872316	C10-12 chloroalkanes	108171-26-2
DTXSID701010942	Octacosane, chloro derivs.	2097144-47-1
DTXSID30218116	2,3',4,4'5,5'-Hexabromobiphenyl	67888-99-7	GNBOTFDIPRGROV-UHFFFAOYSA-N	BrC1=CC(=CC(Br)=C1Br)C1=CC(Br)=C(Br)C=C1Br	BrC1=CC(=CC(Br)=C1Br)C1=CC(Br)=C(Br)C=C1Br	InChI=1S/C12H4Br6/c13-7-4-9(15)8(14)3-6(7)5-1-10(16)12(18)11(17)2-5/h1-4H	C12H4Br6	627.588
DTXSID60109402	Phosphonium, tetrakis(hydroxymethyl)-, chloride (1:1), reaction products with 1-tetradecanamine and urea	359406-89-6
DTXSID50858795	Tris(isopropylphenyl) phosphate	26967-76-0
DTXSID4052685	2,2',3,4,4'-Pentabromodiphenyl ether	182346-21-0	DMLQSUZPTTUUDP-UHFFFAOYSA-N	BrC1=CC=C(OC2=C(Br)C(Br)=C(Br)C=C2)C(Br)=C1	BrC1=CC=C(OC2=C(Br)C(Br)=C(Br)C=C2)C(Br)=C1	InChI=1S/C12H5Br5O/c13-6-1-3-9(8(15)5-6)18-10-4-2-7(14)11(16)12(10)17/h1-5H	C12H5Br5O	564.691
DTXSID7059432	Phosphoric acid, methyl diphenyl ester	115-89-9	VOWPVJACXJNHBC-UHFFFAOYSA-N	COP(=O)(OC1=CC=CC=C1)OC1=CC=CC=C1	COP(=O)(OC1=CC=CC=C1)OC1=CC=CC=C1	InChI=1S/C13H13O4P/c1-15-18(14,16-12-8-4-2-5-9-12)17-13-10-6-3-7-11-13/h2-11H,1H3	C13H13O4P	264.217
DTXSID70879982	BDE-199	446255-43-2	JNSLJYRXDGBNBE-UHFFFAOYSA-N	BrC1=CC(Br)=C(Br)C(OC2=CC(Br)=C(Br)C(Br)=C2Br)=C1Br	BrC1=CC(Br)=C(Br)C(OC2=CC(Br)=C(Br)C(Br)=C2Br)=C1Br	InChI=1S/C12H2Br8O/c13-3-1-4(14)9(18)12(8(3)17)21-6-2-5(15)7(16)11(20)10(6)19/h1-2H	C12H2Br8O	801.379
DTXSID2041593	Alumina	1344-28-1
DTXSID80863938	Tris(1,3-dichloropropan-2-yl) phosphite	6749-73-1	ZAEFNQVGOJSYDQ-UHFFFAOYSA-N	ClCC(CCl)OP(OC(CCl)CCl)OC(CCl)CCl	ClCC(CCl)OP(OC(CCl)CCl)OC(CCl)CCl	InChI=1S/C9H15Cl6O3P/c10-1-7(2-11)16-19(17-8(3-12)4-13)18-9(5-14)6-15/h7-9H,1-6H2	C9H15Cl6O3P	414.89
DTXSID6030782	Bentonite	1302-78-9
DTXSID101016697	Poly-(m-phenylene methylphosphonate)	63747-58-0
DTXSID7052735	1,2-dibromo(phenyl)ethane	93-52-7	SHKKTLSDGJRCTR-UHFFFAOYSA-N	BrCC(Br)C1=CC=CC=C1	BrCC(Br)C1=CC=CC=C1	InChI=1/C8H8Br2/c9-6-8(10)7-4-2-1-3-5-7/h1-5,8H,6H2	C8H8Br2	263.96
DTXSID0026252	Triphenyl phosphite	101-02-0	HVLLSGMXQDNUAL-UHFFFAOYSA-N	O(P(OC1=CC=CC=C1)OC1=CC=CC=C1)C1=CC=CC=C1	O(P(OC1=CC=CC=C1)OC1=CC=CC=C1)C1=CC=CC=C1	InChI=1S/C18H15O3P/c1-4-10-16(11-5-1)19-22(20-17-12-6-2-7-13-17)21-18-14-8-3-9-15-18/h1-15H	C18H15O3P	310.289
DTXSID6098467	1,3-Butadiene, homopolymer, brominated	68441-46-3
DTXSID1052290	2,4-Dibromophenol	615-58-7	FAXWFCTVSHEODL-UHFFFAOYSA-N	OC1=C(Br)C=C(Br)C=C1	OC1=C(Br)C=C(Br)C=C1	InChI=1S/C6H4Br2O/c7-4-1-2-6(9)5(8)3-4/h1-3,9H	C6H4Br2O	251.905
DTXSID70879881	BDE-59	446254-30-4	DMAMJZQQOWYEHT-UHFFFAOYSA-N	BrC1=CC=CC(OC2=C(Br)C=CC(Br)=C2Br)=C1	BrC1=CC=CC(OC2=C(Br)C=CC(Br)=C2Br)=C1	InChI=1S/C12H6Br4O/c13-7-2-1-3-8(6-7)17-12-10(15)5-4-9(14)11(12)16/h1-6H	C12H6Br4O	485.795
DTXSID701016683	2,​4,​6-​tribromo-​3-​(tetrabromopentadecy​l)​-phenol	168434-45-5
DTXSID901017118	Torflam	52734-85-7
DTXSID6020802	Melamine	108-78-1	JDSHMPZPIAZGSV-UHFFFAOYSA-N	NC1=NC(N)=NC(N)=N1	NC1=NC(N)=NC(N)=N1	InChI=1S/C3H6N6/c4-1-7-2(5)9-3(6)8-1/h(H6,4,5,6,7,8,9)	C3H6N6	126.123
DTXSID10577713	2,4-Dibromo-1-(3-bromophenoxy)benzene	147217-77-4	AURKEOPYVUYTLO-UHFFFAOYSA-N	BrC1=CC(Br)=C(OC2=CC(Br)=CC=C2)C=C1	BrC1=CC(Br)=C(OC2=CC(Br)=CC=C2)C=C1	InChI=1S/C12H7Br3O/c13-8-2-1-3-10(6-8)16-12-5-4-9(14)7-11(12)15/h1-7H	C12H7Br3O	406.899
DTXSID40872703	2,2',4-Tribromodiphenyl ether	147217-75-2	VYBFILXLBMWOLI-UHFFFAOYSA-N	BrC1=CC(Br)=C(OC2=CC=CC=C2Br)C=C1	BrC1=CC(Br)=C(OC2=CC=CC=C2Br)C=C1	InChI=1S/C12H7Br3O/c13-8-5-6-12(10(15)7-8)16-11-4-2-1-3-9(11)14/h1-7H	C12H7Br3O	406.899
DTXSID20863371	Phosphonic acid, P-[1-[[(2-chloroethoxy)(2-chloroethyl)phosphinyl]oxy]ethyl]-, 1-[bis(2-chloroethoxy)phosphinyl]ethyl 2-chloroethyl ester	4351-70-6	QDLQFWNOQPOPHV-UHFFFAOYSA-N	CC(OP(=O)(OCCCl)C(C)OP(=O)(CCCl)OCCCl)P(=O)(OCCCl)OCCCl	CC(OP(=O)(OCCCl)C(C)OP(=O)(CCCl)OCCCl)P(=O)(OCCCl)OCCCl	InChI=1/C14H28Cl5O9P3/c1-13(27-29(20,12-7-19)23-8-3-15)31(22,26-11-6-18)28-14(2)30(21,24-9-4-16)25-10-5-17/h13-14H,3-12H2,1-2H3	C14H28Cl5O9P3	610.54
DTXSID70956080	1,2,3,4,7,7-Hexachloro-5-(pentabromophenyl)bicyclo[2.2.1]hept-2-ene	34571-16-9	JKTRLGAVPREUKI-UHFFFAOYSA-N	ClC1=C(Cl)C2(Cl)C(CC1(Cl)C2(Cl)Cl)C1=C(Br)C(Br)=C(Br)C(Br)=C1Br	ClC1=C(Cl)C2(Cl)C(CC1(Cl)C2(Cl)Cl)C1=C(Br)C(Br)=C(Br)C(Br)=C1Br	InChI=1/C13H3Br5Cl6/c14-4-3(5(15)7(17)8(18)6(4)16)2-1-11(21)9(19)10(20)12(2,22)13(11,23)24/h2H,1H2	C13H3Br5Cl6	771.39
DTXSID9074773	PBDE 002	6876-00-2	AHDAKFFMKLQPTD-UHFFFAOYSA-N	BrC1=CC=CC(OC2=CC=CC=C2)=C1	BrC1=CC=CC(OC2=CC=CC=C2)=C1	InChI=1S/C12H9BrO/c13-10-5-4-8-12(9-10)14-11-6-2-1-3-7-11/h1-9H	C12H9BrO	249.107
DTXSID6091554	Zinc borate	1332-07-6	BIKXLKXABVUSMH-UHFFFAOYSA-N	[Zn++].[Zn++].[Zn++].[O-]B([O-])[O-].[O-]B([O-])[O-]		InChI=1S/2BO3.3Zn/c2*2-1(3)4;;;/q2*-3;3*+2	B2O6Zn3	313.75
DTXSID50957474	1,3,5-Tribromo-2-(2,3-dibromo-2-methylpropoxy)benzene	36065-30-2	WNMLTOIDDCEBNY-UHFFFAOYSA-N	CC(Br)(CBr)COC1=C(Br)C=C(Br)C=C1Br	CC(Br)(CBr)COC1=C(Br)C=C(Br)C=C1Br	InChI=1/C10H9Br5O/c1-10(15,4-11)5-16-9-7(13)2-6(12)3-8(9)14/h2-3H,4-5H2,1H3	C10H9Br5O	544.701
DTXSID20879851	BDE-6	147217-72-9	GODQTPRKFHOLPH-UHFFFAOYSA-N	BrC1=CC(OC2=CC=CC=C2Br)=CC=C1	BrC1=CC(OC2=CC=CC=C2Br)=CC=C1	InChI=1S/C12H8Br2O/c13-9-4-3-5-10(8-9)15-12-7-2-1-6-11(12)14/h1-8H	C12H8Br2O	328.003
DTXSID2022121	Triphenylphosphine oxide	791-28-6	FIQMHBFVRAXMOP-UHFFFAOYSA-N	O=P(C1=CC=CC=C1)(C1=CC=CC=C1)C1=CC=CC=C1	O=P(C1=CC=CC=C1)(C1=CC=CC=C1)C1=CC=CC=C1	InChI=1S/C18H15OP/c19-20(16-10-4-1-5-11-16,17-12-6-2-7-13-17)18-14-8-3-9-15-18/h1-15H	C18H15OP	278.291
DTXSID70879942	BDE-137	446254-95-1	HSTYYNPYXZYIAG-UHFFFAOYSA-N	BrC1=CC=C(OC2=C(Br)C(Br)=C(Br)C(Br)=C2)C(Br)=C1	BrC1=CC=C(OC2=C(Br)C(Br)=C(Br)C(Br)=C2)C(Br)=C1	InChI=1S/C12H4Br6O/c13-5-1-2-8(6(14)3-5)19-9-4-7(15)10(16)12(18)11(9)17/h1-4H	C12H4Br6O	643.587
DTXSID50879920	BDE-108	446254-71-3	VBKPKHVLHGOKOJ-UHFFFAOYSA-N	BrC1=CC(OC2=CC=C(Br)C(Br)=C2Br)=CC(Br)=C1	BrC1=CC(OC2=CC=C(Br)C(Br)=C2Br)=CC(Br)=C1	InChI=1S/C12H5Br5O/c13-6-3-7(14)5-8(4-6)18-10-2-1-9(15)11(16)12(10)17/h1-5H	C12H5Br5O	564.691
DTXSID0026258	Tris(2-chloroethyl) phosphite	140-08-9	LUVCTYHBTXSAMX-UHFFFAOYSA-N	ClCCOP(OCCCl)OCCCl	ClCCOP(OCCCl)OCCCl	InChI=1S/C6H12Cl3O3P/c7-1-4-10-13(11-5-2-8)12-6-3-9/h1-6H2	C6H12Cl3O3P	269.48
DTXSID7065912	Diphosphoric acid, compd. with 1,3,5-triazine-2,4,6-triamine (1:?)	15541-60-3
DTXSID001018214	Aluminum sodium hydroxide (NaAl(OH)4)	12251-53-5	SVEIXENKLWYGIZ-UHFFFAOYSA-J	[OH-].[OH-].[OH-].[OH-].[Na+].[Al+3]		InChI=1S/Al.Na.4H2O/h;;4*1H2/q+3;+1;;;;/p-4	AlH4NaO4	117.999
DTXSID201016652	Tris(chloropropyl)phosphate	26248-87-3
DTXSID101016704	bis(2,3-dibromopropyl) 3,4,5,6-tetrabromobenzene-1,2-dicarboxylate	214216-08-7	GTKAGLSURYOSPN-UHFFFAOYSA-N	BrCC(Br)COC(=O)C1=C(C(=O)OCC(Br)CBr)C(Br)=C(Br)C(Br)=C1Br	BrCC(Br)COC(=O)C1=C(C(=O)OCC(Br)CBr)C(Br)=C(Br)C(Br)=C1Br	InChI=1/C14H10Br8O4/c15-1-5(17)3-25-13(23)7-8(14(24)26-4-6(18)2-16)10(20)12(22)11(21)9(7)19/h5-6H,1-4H2	C14H10Br8O4	881.462
DTXSID30451985	2,2′,3,3′,4,4′,5,6,6′-Nonabromodiphenyl ether	437701-79-6	IEEVDIAVLGLVOW-UHFFFAOYSA-N	BrC1=CC(Br)=C(Br)C(Br)=C1OC1=C(Br)C(Br)=C(Br)C(Br)=C1Br	BrC1=CC(Br)=C(Br)C(Br)=C1OC1=C(Br)C(Br)=C(Br)C(Br)=C1Br	InChI=1S/C12HBr9O/c13-2-1-3(14)11(8(19)4(2)15)22-12-9(20)6(17)5(16)7(18)10(12)21/h1H	C12HBr9O	880.275
DTXSID9047754	Phosphorus oxide (P2O5)	1314-56-3
DTXSID2029458	Bromo chloro C12-30 a-alkenes	68527-01-5
DTXSID701017112	Fyrquel GT	55818-86-5
DTXSID10923559	Bromine--methane (1/16)	12079-58-2	UTEAJUQTEFBYOE-UHFFFAOYSA-N	C.C.C.C.C.C.C.C.C.C.C.C.C.C.C.C.BrBr	C	InChI=1S/16CH4.Br2/c;;;;;;;;;;;;;;;;1-2/h16*1H4;	C16H64Br2	416.496
DTXSID2052738	Tetraethyl ethylenebisphosphonate	995-32-4	RSQYXXACEZCDFS-UHFFFAOYSA-N	CCOP(=O)(CCP(=O)(OCC)OCC)OCC	CCOP(=O)(CCP(=O)(OCC)OCC)OCC	InChI=1S/C10H24O6P2/c1-5-13-17(11,14-6-2)9-10-18(12,15-7-3)16-8-4/h5-10H2,1-4H3	C10H24O6P2	302.244
DTXSID10879921	BDE-109	446254-72-4	FXXXWTMLIQLDRP-UHFFFAOYSA-N	BrC1=CC=CC(OC2=C(Br)C=C(Br)C(Br)=C2Br)=C1	BrC1=CC=CC(OC2=C(Br)C=C(Br)C(Br)=C2Br)=C1	InChI=1S/C12H5Br5O/c13-6-2-1-3-7(4-6)18-12-9(15)5-8(14)10(16)11(12)17/h1-5H	C12H5Br5O	564.691
DTXSID20108830	1H-Indene, 2,3-dihydro-1,1,3-trimethyl-3-phenyl-, octabromo deriv.	155613-93-7
DTXSID2020268	Chlorendic acid	115-28-6	DJKGDNKYTKCJKD-UHFFFAOYSA-N	OC(=O)C1C(C(O)=O)C2(Cl)C(Cl)=C(Cl)C1(Cl)C2(Cl)Cl	OC(=O)C1C(C(O)=O)C2(Cl)C(Cl)=C(Cl)C1(Cl)C2(Cl)Cl	InChI=1/C9H4Cl6O4/c10-3-4(11)8(13)2(6(18)19)1(5(16)17)7(3,12)9(8,14)15/h1-2H,(H,16,17)(H,18,19)	C9H4Cl6O4	388.83
DTXSID0060561	2,6-Dibromophenol	608-33-3	SSIZLKDLDKIHEV-UHFFFAOYSA-N	OC1=C(Br)C=CC=C1Br	OC1=C(Br)C=CC=C1Br	InChI=1S/C6H4Br2O/c7-4-2-1-3-5(8)6(4)9/h1-3,9H	C6H4Br2O	251.905
DTXSID60879936	BDE-131	446254-89-3	MGKVPJFIGGBCBA-UHFFFAOYSA-N	BrC1=CC(Br)=C(Br)C(Br)=C1OC1=CC=CC(Br)=C1Br	BrC1=CC(Br)=C(Br)C(Br)=C1OC1=CC=CC(Br)=C1Br	InChI=1S/C12H4Br6O/c13-5-2-1-3-8(9(5)16)19-12-7(15)4-6(14)10(17)11(12)18/h1-4H	C12H4Br6O	643.587
DTXSID10879906	1,2,5-Tribromo-3-(2,4-dibromophenoxy)benzene	446254-57-5	BATFXMGTVIESIQ-UHFFFAOYSA-N	BrC1=CC(Br)=C(OC2=CC(Br)=CC(Br)=C2Br)C=C1	BrC1=CC(Br)=C(OC2=CC(Br)=CC(Br)=C2Br)C=C1	InChI=1S/C12H5Br5O/c13-6-1-2-10(8(15)3-6)18-11-5-7(14)4-9(16)12(11)17/h1-5H	C12H5Br5O	564.691
DTXSID901016689	Tris(dichloropropyl) phosphate	26604-51-3
DTXSID40949863	Tetrakis(hydroxymethyl)phosphanium carbamimidate--hydrogen chloride (1/1/1)	27104-30-9	SNIVVKDUMQYBAV-UHFFFAOYSA-M	Cl.NC([O-])=N.OC[P+](CO)(CO)CO		InChI=1S/C4H12O4P.CH4N2O.ClH/c5-1-9(2-6,3-7)4-8;2-1(3)4;/h5-8H,1-4H2;(H4,2,3,4);1H/q+1;;/p-1	C5H16ClN2O5P	250.62
DTXSID60879895	BDE-75	189084-63-7	BWCNKMFFUGBFGB-UHFFFAOYSA-N	BrC1=CC=C(OC2=C(Br)C=C(Br)C=C2Br)C=C1	BrC1=CC=C(OC2=C(Br)C=C(Br)C=C2Br)C=C1	InChI=1S/C12H6Br4O/c13-7-1-3-9(4-2-7)17-12-10(15)5-8(14)6-11(12)16/h1-6H	C12H6Br4O	485.795
DTXSID40477015	3,4-Dibromodiphenyl ether	189084-59-1	SUUJFDKVPDCZQZ-UHFFFAOYSA-N	BrC1=C(Br)C=C(OC2=CC=CC=C2)C=C1	BrC1=C(Br)C=C(OC2=CC=CC=C2)C=C1	InChI=1S/C12H8Br2O/c13-11-7-6-10(8-12(11)14)15-9-4-2-1-3-5-9/h1-8H	C12H8Br2O	328.003
DTXSID3043786	Tetrakis(hydroxymethyl)phosphonium	24655-84-3	FAUOSXUSCVJWAY-UHFFFAOYSA-N	OC[P+](CO)(CO)CO	OCP(CO)(CO)CO	InChI=1S/C4H12O4P/c5-1-9(2-6,3-7)4-8/h5-8H,1-4H2/q+1	C4H12O4P	155.109
DTXSID80201295	Phosphonium, tetrakis(hydroxymethyl)-, ethanedioate (1:1) (salt)	53211-22-6	AEHUAZHMBGNFSC-UHFFFAOYSA-M	OC(=O)C([O-])=O.OC[P+](CO)(CO)CO	OCP(CO)(CO)CO	InChI=1S/C4H12O4P.C2H2O4/c5-1-9(2-6,3-7)4-8;3-1(4)2(5)6/h5-8H,1-4H2;(H,3,4)(H,5,6)/q+1;/p-1	C6H13O8P	244.136
DTXSID401016696	Tribromostyrene (mixed isomers)	61368-34-1
DTXSID40879979	BDE-187	446255-28-3	RFZPXOBFDARWHV-UHFFFAOYSA-N	BrC1=CC(Br)=C(OC2=C(Br)C(Br)=CC(Br)=C2Br)C=C1Br	BrC1=CC(Br)=C(OC2=C(Br)C(Br)=CC(Br)=C2Br)C=C1Br	InChI=1S/C12H3Br7O/c13-4-1-6(15)9(3-5(4)14)20-12-10(18)7(16)2-8(17)11(12)19/h1-3H	C12H3Br7O	722.483
DTXSID10879966	BDE-167	446255-17-0	NMUPLZRHSXJCJQ-UHFFFAOYSA-N	BrC1=CC(OC2=CC(Br)=C(Br)C=C2Br)=CC(Br)=C1Br	BrC1=CC(OC2=CC(Br)=C(Br)C=C2Br)=CC(Br)=C1Br	InChI=1S/C12H4Br6O/c13-6-3-8(15)11(4-7(6)14)19-5-1-9(16)12(18)10(17)2-5/h1-4H	C12H4Br6O	643.587
DTXSID70872796	Poly(pentabromobenzyl acrylate)	59447-57-3		BrC1=C(Br)C(Br)=C(COC(=O)C(-*)C-*)C(Br)=C1Br |$;;;;;;;;;;;;star_e;;star_e;;;;$,c:1,16,t:5,lp:0:3,3:3,5:3,8:2,10:2,16:3,18:3,Sg:n:12,14,13,11::ht|			(C2H3)nC8H2Br5O2
DTXSID001017111	End capped and partially end capped brominated epoxy oligomer	139638-58-7
DTXSID6094435	Ethanol, 2-chloro-, phosphate (3:1), homopolymer	28205-79-0
DTXSID101018500	Alkanes, C20-24, chloro	2097144-45-9
DTXSID8043781	Tetrabromophthalic acid	13810-83-8	XIRDTMSOGDWMOX-UHFFFAOYSA-N	OC(=O)C1=C(Br)C(Br)=C(Br)C(Br)=C1C(O)=O	OC(=O)C1=C(Br)C(Br)=C(Br)C(Br)=C1C(O)=O	InChI=1S/C8H2Br4O4/c9-3-1(7(13)14)2(8(15)16)4(10)6(12)5(3)11/h(H,13,14)(H,15,16)	C8H2Br4O4	481.716
DTXSID60879911	BDE-96	446254-63-3	ZFCJNRDWGBZUED-UHFFFAOYSA-N	BrC1=CC=CC(Br)=C1OC1=C(Br)C=CC(Br)=C1Br	BrC1=CC=CC(Br)=C1OC1=C(Br)C=CC(Br)=C1Br	InChI=1S/C12H5Br5O/c13-6-4-5-9(16)12(10(6)17)18-11-7(14)2-1-3-8(11)15/h1-5H	C12H5Br5O	564.691
DTXSID3020174	Bis(2,3-dibromopropyl) phosphate, magnesium salt	36711-31-6	ISAQEMSCDXXEBE-UHFFFAOYSA-L	[Mg++].[O-]P(=O)(OCC(Br)CBr)OCC(Br)CBr.[O-]P(=O)(OCC(Br)CBr)OCC(Br)CBr	OP(=O)(OCC(Br)CBr)OCC(Br)CBr	InChI=1/2C6H11Br4O4P.Mg/c2*7-1-5(9)3-13-15(11,12)14-4-6(10)2-8;/h2*5-6H,1-4H2,(H,11,12);/q;;+2/p-2	C12H20Br8MgO8P2	1017.77
DTXSID90274233	2,3-Dibromo-2-butene-1,4-diol	3234-02-4	MELXIJRBKWTTJH-UHFFFAOYSA-N	OCC(Br)=C(Br)CO	OCC(Br)=C(Br)CO	InChI=1S/C4H6Br2O2/c5-3(1-7)4(6)2-8/h7-8H,1-2H2	C4H6Br2O2	245.898
DTXSID5052676	Tris(4-methylphenyl) phosphate	78-32-0	BOSMZFBHAYFUBJ-UHFFFAOYSA-N	CC1=CC=C(OP(=O)(OC2=CC=C(C)C=C2)OC2=CC=C(C)C=C2)C=C1	CC1=CC=C(OP(=O)(OC2=CC=C(C)C=C2)OC2=CC=C(C)C=C2)C=C1	InChI=1S/C21H21O4P/c1-16-4-10-19(11-5-16)23-26(22,24-20-12-6-17(2)7-13-20)25-21-14-8-18(3)9-15-21/h4-15H,1-3H3	C21H21O4P	368.369
DTXSID7034389	Boron sodium oxide pentahydrate	12179-04-3	QZSYXKPOZFXCDM-UHFFFAOYSA-N	O.O.O.O.O.[Na+].[Na+].[O-]B(OB=O)OB([O-])OB=O		InChI=1S/B4O7.2Na.5H2O/c5-1-9-3(7)11-4(8)10-2-6;;;;;;;/h;;;5*1H2/q-2;2*+1;;;;;	B4H10Na2O12	291.29
DTXSID90894430	Molybdenum zinc oxide	61583-60-6
DTXSID7074749	1,2,3,4,5-Pentabromo-6-(2,4,5-tribromophenoxy)benzene	337513-72-1	RTUZOQFRIPIWPS-UHFFFAOYSA-N	BrC1=CC(Br)=C(Br)C=C1OC1=C(Br)C(Br)=C(Br)C(Br)=C1Br	BrC1=CC(Br)=C(Br)C=C1OC1=C(Br)C(Br)=C(Br)C(Br)=C1Br	InChI=1S/C12H2Br8O/c13-3-1-5(15)6(2-4(3)14)21-12-10(19)8(17)7(16)9(18)11(12)20/h1-2H	C12H2Br8O	801.379
DTXSID10879860	BDE-29	337513-56-1	LTMKAFUXYKEDLR-UHFFFAOYSA-N	BrC1=CC(Br)=C(Br)C=C1OC1=CC=CC=C1	BrC1=CC(Br)=C(Br)C=C1OC1=CC=CC=C1	InChI=1S/C12H7Br3O/c13-9-6-11(15)12(7-10(9)14)16-8-4-2-1-3-5-8/h1-7H	C12H7Br3O	406.899
DTXSID50879965	BDE-166	189084-58-0	KVYODBMKQYVNEK-UHFFFAOYSA-N	BrC1=CC=C(OC2=C(Br)C(Br)=C(Br)C(Br)=C2Br)C=C1	BrC1=CC=C(OC2=C(Br)C(Br)=C(Br)C(Br)=C2Br)C=C1	InChI=1S/C12H4Br6O/c13-5-1-3-6(4-2-5)19-12-10(17)8(15)7(14)9(16)11(12)18/h1-4H	C12H4Br6O	643.587
DTXSID9026267	Trixylyl phosphate	25155-23-1		C*.C*.C*.C*.C*.C*.O=P(OC1=CC=CC=C1)(OC1=CC=CC=C1)OC1=CC=CC=C1 |c:11,13,19,21,27,29,t:9,17,25,lp:12:2,14:2,21:2,28:2,m:1:33.34,3:30.31.32.33,5:16.17,7:17.18.19.20,9:23.24,11:24.25.26.27|
DTXSID80107228	Phosphoric trichloride, reaction products with bisphenol A and phenol	181028-79-5
DTXSID6052168	N,N'-(Ethylene)bis[4,5-dibromohexahydro-3,6-methanophthalimide]	52907-07-0	WOFYQUJNULCFLN-UHFFFAOYSA-N	BrC1C(Br)C2CC1C1C2C(=O)N(CCN2C(=O)C3C4CC(C(Br)C4Br)C3C2=O)C1=O	BrC1C(Br)C2CC1C1C2C(=O)N(CCN2C(=O)C3C4CC(C(Br)C4Br)C3C2=O)C1=O	InChI=1/C20H20Br4N2O4/c21-13-5-3-6(14(13)22)10-9(5)17(27)25(18(10)28)1-2-26-19(29)11-7-4-8(12(11)20(26)30)16(24)15(7)23/h5-16H,1-4H2	C20H20Br4N2O4	672.006
DTXSID10879880	BDE-58	446254-29-1	SWOYBZHGPZIRHS-UHFFFAOYSA-N	BrC1=CC(OC2=CC=CC(Br)=C2Br)=CC(Br)=C1	BrC1=CC(OC2=CC=CC(Br)=C2Br)=CC(Br)=C1	InChI=1S/C12H6Br4O/c13-7-4-8(14)6-9(5-7)17-11-3-1-2-10(15)12(11)16/h1-6H	C12H6Br4O	485.795
DTXSID8073471	Benzene, dibromoethenyl-	7436-90-0	CYLVUSZHVURAOY-UHFFFAOYSA-N	BrC(Br)=CC1=CC=CC=C1	BrC(Br)=CC1=CC=CC=C1	InChI=1S/C8H6Br2/c9-8(10)6-7-4-2-1-3-5-7/h1-6H	C8H6Br2	261.944
DTXSID3052307	1,3,5-Tribromobenzene	626-39-1	YWDUZLFWHVQCHY-UHFFFAOYSA-N	BrC1=CC(Br)=CC(Br)=C1	BrC1=CC(Br)=CC(Br)=C1	InChI=1S/C6H3Br3/c7-4-1-5(8)3-6(9)2-4/h1-3H	C6H3Br3	314.802
DTXSID001010941	Hexacosane, chloro derivs.	2097144-46-0
DTXSID30872797	Potassium 3-(phenylsulfonyl)benzenesulfonate	63316-43-8	HGJYOHAIVZXUML-UHFFFAOYSA-M	[K+].[O-]S(=O)(=O)C1=CC=CC(=C1)S(=O)(=O)C1=CC=CC=C1	OS(=O)(=O)C1=CC=CC(=C1)S(=O)(=O)C1=CC=CC=C1	InChI=1S/C12H10O5S2.K/c13-18(14,10-5-2-1-3-6-10)11-7-4-8-12(9-11)19(15,16)17;/h1-9H,(H,15,16,17);/q;+1/p-1	C12H9KO5S2	336.42
DTXSID30864056	1,2-Benzenedicarboxylic acid, 1,2-bis(2,3-dibromopropyl) ester	7415-86-3	IVARTEJQLIMVJT-UHFFFAOYSA-N	BrCC(Br)COC(=O)C1=CC=CC=C1C(=O)OCC(Br)CBr	BrCC(Br)COC(=O)C1=CC=CC=C1C(=O)OCC(Br)CBr	InChI=1/C14H14Br4O4/c15-5-9(17)7-21-13(19)11-3-1-2-4-12(11)14(20)22-8-10(18)6-16/h1-4,9-10H,5-8H2	C14H14Br4O4	565.878
DTXSID40879954	BDE-151	446255-06-7	NGOQQUYCSISZMY-UHFFFAOYSA-N	BrC1=CC(OC2=C(Br)C(Br)=CC(Br)=C2Br)=C(Br)C=C1	BrC1=CC(OC2=C(Br)C(Br)=CC(Br)=C2Br)=C(Br)C=C1	InChI=1S/C12H4Br6O/c13-5-1-2-6(14)9(3-5)19-12-10(17)7(15)4-8(16)11(12)18/h1-4H	C12H4Br6O	643.587
DTXSID80862522	Tris(3-chloropropyl)phosphate	1067-98-7	WOURXYYHORRGQO-UHFFFAOYSA-N	ClCCCOP(=O)(OCCCCl)OCCCCl	ClCCCOP(=O)(OCCCCl)OCCCCl	InChI=1S/C9H18Cl3O4P/c10-4-1-7-14-17(13,15-8-2-5-11)16-9-3-6-12/h1-9H2	C9H18Cl3O4P	327.56
DTXSID3051466	Tris(4-tert-butylphenyl) phosphate	78-33-1	LORSVOJSXMHDHF-UHFFFAOYSA-N	CC(C)(C)C1=CC=C(OP(=O)(OC2=CC=C(C=C2)C(C)(C)C)OC2=CC=C(C=C2)C(C)(C)C)C=C1	CC(C)(C)C1=CC=C(OP(=O)(OC2=CC=C(C=C2)C(C)(C)C)OC2=CC=C(C=C2)C(C)(C)C)C=C1	InChI=1S/C30H39O4P/c1-28(2,3)22-10-16-25(17-11-22)32-35(31,33-26-18-12-23(13-19-26)29(4,5)6)34-27-20-14-24(15-21-27)30(7,8)9/h10-21H,1-9H3	C30H39O4P	494.612
DTXSID30879903	BDE-87	446254-54-2	WKYQUGCIKNOXFW-UHFFFAOYSA-N	BrC1=CC=C(Br)C(OC2=C(Br)C(Br)=C(Br)C=C2)=C1	BrC1=CC=C(Br)C(OC2=C(Br)C(Br)=C(Br)C=C2)=C1	InChI=1S/C12H5Br5O/c13-6-1-2-7(14)10(5-6)18-9-4-3-8(15)11(16)12(9)17/h1-5H	C12H5Br5O	564.691
DTXSID70218014	1,1'-Biphenyl, 2,2',3,4,4',5,5'-heptabromo-	67733-52-2	RPGHQOFAFNAVNA-UHFFFAOYSA-N	BrC1=CC(Br)=C(Br)C=C1C1=CC(Br)=C(Br)C(Br)=C1Br	BrC1=CC(Br)=C(Br)C=C1C1=CC(Br)=C(Br)C(Br)=C1Br	InChI=1S/C12H3Br7/c13-6-3-8(15)7(14)1-4(6)5-2-9(16)11(18)12(19)10(5)17/h1-3H	C12H3Br7	706.484
DTXSID6021959	2,4,6-Tribromophenol	118-79-6	BSWWXRFVMJHFBN-UHFFFAOYSA-N	OC1=C(Br)C=C(Br)C=C1Br	OC1=C(Br)C=C(Br)C=C1Br	InChI=1S/C6H3Br3O/c7-3-1-4(8)6(10)5(9)2-3/h1-2,10H	C6H3Br3O	330.801
DTXSID601015670	Carbonic dichloride, polymer with 4,​4'-​(1-​methylethylidene)​bis[2,​6-​dibromophenol] and phenol	94334-64-2
DTXSID60886428	Benzene, 1,1'-[1,2-ethanediylbis(oxy)]bis[2,3,4,5,6-pentabromo-	61262-53-1	JJEPQBZQAGCZTH-UHFFFAOYSA-N	BrC1=C(Br)C(Br)=C(OCCOC2=C(Br)C(Br)=C(Br)C(Br)=C2Br)C(Br)=C1Br	BrC1=C(Br)C(Br)=C(OCCOC2=C(Br)C(Br)=C(Br)C(Br)=C2Br)C(Br)=C1Br	InChI=1S/C14H4Br10O2/c15-3-5(17)9(21)13(10(22)6(3)18)25-1-2-26-14-11(23)7(19)4(16)8(20)12(14)24/h1-2H2	C14H4Br10O2	1003.22
DTXSID60199202	s-Triazine, 2,2'-O-phenylene-bis(4,6-diamino-	5118-79-6	FNNFAYGKUXMHSH-UHFFFAOYSA-N	NC1=NC(=NC(N)=N1)C1=CC=CC=C1C1=NC(N)=NC(N)=N1	NC1=NC(=NC(N)=N1)C1=CC=CC=C1C1=NC(N)=NC(N)=N1	InChI=1S/C12H12N10/c13-9-17-7(18-10(14)21-9)5-3-1-2-4-6(5)8-19-11(15)22-12(16)20-8/h1-4H,(H4,13,14,17,18,21)(H4,15,16,19,20,22)	C12H12N10	296.298
DTXSID6044563	6H-Dibenzo[c,e][1,2]oxaphosphinine 6-oxide	35948-25-5	VBQRUYIOTHNGOP-UHFFFAOYSA-N	O=P1OC2=C(C=CC=C2)C2=C1C=CC=C2	O=P1OC2=C(C=CC=C2)C2=C1C=CC=C2	InChI=1S/C12H9O2P/c13-15-12-8-4-2-6-10(12)9-5-1-3-7-11(9)14-15/h1-8,15H	C12H9O2P	216.176
DTXSID90879969	BDE-170	327185-13-7	DLPNCMQTNWLTHD-UHFFFAOYSA-N	BrC1=CC=C(OC2=C(Br)C(Br)=C(Br)C(Br)=C2)C(Br)=C1Br	BrC1=CC=C(OC2=C(Br)C(Br)=C(Br)C(Br)=C2)C(Br)=C1Br	InChI=1S/C12H3Br7O/c13-4-1-2-6(10(17)8(4)15)20-7-3-5(14)9(16)12(19)11(7)18/h1-3H	C12H3Br7O	722.483
DTXSID4051665	Phosphoric acid, [1,1′-biphenyl]-2-yl diphenyl ester	132-29-6	QARIOUOTENZTDH-UHFFFAOYSA-N	O=P(OC1=CC=CC=C1)(OC1=CC=CC=C1)OC1=C(C=CC=C1)C1=CC=CC=C1	O=P(OC1=CC=CC=C1)(OC1=CC=CC=C1)OC1=C(C=CC=C1)C1=CC=CC=C1	InChI=1S/C24H19O4P/c25-29(26-21-14-6-2-7-15-21,27-22-16-8-3-9-17-22)28-24-19-11-10-18-23(24)20-12-4-1-5-13-20/h1-19H	C24H19O4P	402.386
DTXSID20210629	Dioctyl phenyl phosphate	6161-81-5	QHGRPTNUHWYCEN-UHFFFAOYSA-N	CCCCCCCCOP(=O)(OCCCCCCCC)OC1=CC=CC=C1	CCCCCCCCOP(=O)(OCCCCCCCC)OC1=CC=CC=C1	InChI=1S/C22H39O4P/c1-3-5-7-9-11-16-20-24-27(23,26-22-18-14-13-15-19-22)25-21-17-12-10-8-6-4-2/h13-15,18-19H,3-12,16-17,20-21H2,1-2H3	C22H39O4P	398.524
DTXSID80872666	Alkanes, C10-32, chloro	84776-06-7
DTXSID90873922	2,3',4',6-Tetrabromodiphenyl Ether	189084-62-6	COPAGYRSCJVION-UHFFFAOYSA-N	BrC1=CC=CC(Br)=C1OC1=CC(Br)=C(Br)C=C1	BrC1=CC=CC(Br)=C1OC1=CC(Br)=C(Br)C=C1	InChI=1S/C12H6Br4O/c13-8-5-4-7(6-11(8)16)17-12-9(14)2-1-3-10(12)15/h1-6H	C12H6Br4O	485.795
DTXSID901010948	Tetradecane, chloro derivs.	198840-65-2
DTXSID70872771	Melamine-(aluminium phosphate)	1271168-40-1	ORUHMQWZTQOQCD-UHFFFAOYSA-K	[Al+3].NC1=NC(N)=NC(N)=N1.NC1=NC(N)=NC(N)=N1.OP([O-])(=O)OP([O-])(=O)OP(O)([O-])=O	NC1=NC(N)=NC(N)=N1	InChI=1S/2C3H6N6.Al.H5O10P3/c2*4-1-7-2(5)9-3(6)8-1;;1-11(2,3)9-13(7,8)10-12(4,5)6/h2*(H6,4,5,6,7,8,9);;(H,7,8)(H2,1,2,3)(H2,4,5,6)/q;;+3;/p-3	C6H14AlN12O10P3	534.155
DTXSID80879913	BDE-101	446254-65-5	QUZWDWNIWWAQDI-UHFFFAOYSA-N	BrC1=CC=C(Br)C(OC2=C(Br)C=C(Br)C(Br)=C2)=C1	BrC1=CC=C(Br)C(OC2=C(Br)C=C(Br)C(Br)=C2)=C1	InChI=1S/C12H5Br5O/c13-6-1-2-7(14)11(3-6)18-12-5-9(16)8(15)4-10(12)17/h1-5H	C12H5Br5O	564.691
DTXSID30858238	4,5,6,7-Tetrabromo-1,1,3-trimethyl-3-(2,3,4,5-tetrabromophenyl)-2,3-dihydro-1H-indene	1084889-51-9	MVUXOUVWNWWKOU-UHFFFAOYSA-N	CC1(C)CC(C)(C2=C1C(Br)=C(Br)C(Br)=C2Br)C1=CC(Br)=C(Br)C(Br)=C1Br	CC1(C)CC(C)(C2=C1C(Br)=C(Br)C(Br)=C2Br)C1=CC(Br)=C(Br)C(Br)=C1Br,CC1(C)CC(C)(C2=C1C(Br)=C(Br)C(Br)=C2Br)C1=CC(Br)=C(Br)C(Br)=C1Br	InChI=1S/C18H12Br8/c1-17(2)5-18(3,6-4-7(19)11(21)14(24)10(6)20)9-8(17)12(22)15(25)16(26)13(9)23/h4H,5H2,1-3H3	C18H12Br8	867.526
DTXSID0021414	Tris(2-ethylhexyl) phosphate	78-42-2	GTVWRXDRKAHEAD-UHFFFAOYSA-N	CCCCC(CC)COP(=O)(OCC(CC)CCCC)OCC(CC)CCCC	CCCCC(CC)COP(=O)(OCC(CC)CCCC)OCC(CC)CCCC	InChI=1/C24H51O4P/c1-7-13-16-22(10-4)19-26-29(25,27-20-23(11-5)17-14-8-2)28-21-24(12-6)18-15-9-3/h22-24H,7-21H2,1-6H3	C24H51O4P	434.642
DTXSID0052708	4,4'-Sulphonylbis[2,6-dibromophenol]	39635-79-5	JHJUYGMZIWDHMO-UHFFFAOYSA-N	OC1=C(Br)C=C(C=C1Br)S(=O)(=O)C1=CC(Br)=C(O)C(Br)=C1	OC1=C(Br)C=C(C=C1Br)S(=O)(=O)C1=CC(Br)=C(O)C(Br)=C1	InChI=1S/C12H6Br4O4S/c13-7-1-5(2-8(14)11(7)17)21(19,20)6-3-9(15)12(18)10(16)4-6/h1-4,17-18H	C12H6Br4O4S	565.85
DTXSID40879853	BDE-18	407606-55-7	FAZLXBWRNJAGSV-UHFFFAOYSA-N	BrC1=CC(OC2=CC=CC=C2Br)=C(Br)C=C1	BrC1=CC(OC2=CC=CC=C2Br)=C(Br)C=C1	InChI=1S/C12H7Br3O/c13-8-5-6-10(15)12(7-8)16-11-4-2-1-3-9(11)14/h1-7H	C12H7Br3O	406.899
DTXSID1029704	Ammonium sulfate	7783-20-2	BFNBIHQBYMNNAN-UHFFFAOYSA-N	[NH4+].[NH4+].[O-]S([O-])(=O)=O		InChI=1S/2H3N.H2O4S/c;;1-5(2,3)4/h2*1H3;(H2,1,2,3,4)	H8N2O4S	132.13
DTXSID70879962	BDE-163	446255-14-7	NUEAHMLXQFHEJN-UHFFFAOYSA-N	BrC1=CC(Br)=C(Br)C(OC2=CC(Br)=C(Br)C=C2)=C1Br	BrC1=CC(Br)=C(Br)C(OC2=CC(Br)=C(Br)C=C2)=C1Br	InChI=1S/C12H4Br6O/c13-6-2-1-5(3-7(6)14)19-12-10(17)8(15)4-9(16)11(12)18/h1-4H	C12H4Br6O	643.587
DTXSID7028695	Alkenes, C12-24, chloro	68527-02-6
DTXSID60152372	1,1'-Biphenyl, 2,2',3,3',4,4',6,6'-octabromo-	119264-59-4	TUXCLUQAWBNRIW-UHFFFAOYSA-N	BrC1=CC(Br)=C(Br)C(Br)=C1C1=C(Br)C(Br)=C(Br)C=C1Br	BrC1=CC(Br)=C(Br)C(Br)=C1C1=C(Br)C(Br)=C(Br)C=C1Br	InChI=1S/C12H2Br8/c13-3-1-5(15)9(17)11(19)7(3)8-4(14)2-6(16)10(18)12(8)20/h1-2H	C12H2Br8	785.38
DTXSID2061149	Tributylphosphine oxide	814-29-9	MNZAKDODWSQONA-UHFFFAOYSA-N	CCCCP(=O)(CCCC)CCCC	CCCCP(=O)(CCCC)CCCC	InChI=1S/C12H27OP/c1-4-7-10-14(13,11-8-5-2)12-9-6-3/h4-12H2,1-3H3	C12H27OP	218.321
DTXSID00879950	BDE-147	116995-33-6	OWBKWMDBTWHGHS-UHFFFAOYSA-N	BrC1=CC(Br)=C(OC2=C(Br)C(Br)=CC(Br)=C2Br)C=C1	BrC1=CC(Br)=C(OC2=C(Br)C(Br)=CC(Br)=C2Br)C=C1	InChI=1S/C12H4Br6O/c13-5-1-2-9(6(14)3-5)19-12-10(17)7(15)4-8(16)11(12)18/h1-4H	C12H4Br6O	643.587
DTXSID10879941	BDE-136	446254-94-0	NTWGDSLWLUPCDW-UHFFFAOYSA-N	BrC1=C(Br)C(OC2=C(Br)C=CC(Br)=C2Br)=C(Br)C=C1	BrC1=C(Br)C(OC2=C(Br)C=CC(Br)=C2Br)=C(Br)C=C1	InChI=1S/C12H4Br6O/c13-5-1-3-7(15)11(9(5)17)19-12-8(16)4-2-6(14)10(12)18/h1-4H	C12H4Br6O	643.587
DTXSID60232825	2,2',3,3',5,5',6,6'-Octabromo-4-phenoxy-1,1'-biphenyl	83929-69-5	ROAUFAHZXBZKFC-UHFFFAOYSA-N	BrC1=CC(Br)=C(Br)C(=C1Br)C1=C(Br)C(Br)=C(OC2=CC=CC=C2)C(Br)=C1Br	BrC1=CC(Br)=C(Br)C(=C1Br)C1=C(Br)C(Br)=C(OC2=CC=CC=C2)C(Br)=C1Br	InChI=1S/C18H6Br8O/c19-8-6-9(20)13(22)10(12(8)21)11-14(23)16(25)18(17(26)15(11)24)27-7-4-2-1-3-5-7/h1-6H	C18H6Br8O	877.477
DTXSID00956119	Tetrakis(1-chloropropan-2-yl) ethane-1,2-diyl bis(phosphate)	34621-99-3	BUMSXEVUCFMUJR-UHFFFAOYSA-N	CC(CCl)OP(=O)(OCCOP(=O)(OC(C)CCl)OC(C)CCl)OC(C)CCl	CC(CCl)OP(=O)(OCCOP(=O)(OC(C)CCl)OC(C)CCl)OC(C)CCl	InChI=1/C14H28Cl4O8P2/c1-11(7-15)23-27(19,24-12(2)8-16)21-5-6-22-28(20,25-13(3)9-17)26-14(4)10-18/h11-14H,5-10H2,1-4H3	C14H28Cl4O8P2	528.12
DTXSID4024640	4-Bromobiphenyl	92-66-0	PKJBWOWQJHHAHG-UHFFFAOYSA-N	BrC1=CC=C(C=C1)C1=CC=CC=C1	BrC1=CC=C(C=C1)C1=CC=CC=C1	InChI=1S/C12H9Br/c13-12-8-6-11(7-9-12)10-4-2-1-3-5-10/h1-9H	C12H9Br	233.108
DTXSID10855048	1,3,5-Tribromo-2-(2,3-dibromophenoxy)benzene	38463-82-0	OCLWEJVGAUFXQU-UHFFFAOYSA-N	BrC1=CC(Br)=C(OC2=C(Br)C(Br)=CC=C2)C(Br)=C1	BrC1=CC(Br)=C(OC2=C(Br)C(Br)=CC=C2)C(Br)=C1	InChI=1S/C12H5Br5O/c13-6-4-8(15)12(9(16)5-6)18-10-3-1-2-7(14)11(10)17/h1-5H	C12H5Br5O	564.691
DTXSID3060950	1,3,5-Triazin-2(1H)-one, 4,6-diamino-	645-92-1	MASBWURJQFFLOO-UHFFFAOYSA-N	NC1=NC(N)=NC(=O)N1	NC1=NC(N)=NC(=O)N1	InChI=1S/C3H5N5O/c4-1-6-2(5)8-3(9)7-1/h(H5,4,5,6,7,8,9)	C3H5N5O	127.107
DTXSID40873972	BDE-180	446255-26-1	STMBXVOJNOJRPZ-UHFFFAOYSA-N	BrC1=CC(Br)=C(OC2=CC(Br)=C(Br)C(Br)=C2Br)C=C1Br	BrC1=CC(Br)=C(OC2=CC(Br)=C(Br)C(Br)=C2Br)C=C1Br	InChI=1S/C12H3Br7O/c13-4-1-6(15)8(2-5(4)14)20-9-3-7(16)10(17)12(19)11(9)18/h1-3H	C12H3Br7O	722.483
DTXSID20879932	BDE-124	446254-84-8	FGHJTAAHIFEHLT-UHFFFAOYSA-N	BrC1=CC(OC2=CC(Br)=C(Br)C(Br)=C2)=C(Br)C=C1	BrC1=CC(OC2=CC(Br)=C(Br)C(Br)=C2)=C(Br)C=C1	InChI=1S/C12H5Br5O/c13-6-1-2-8(14)11(3-6)18-7-4-9(15)12(17)10(16)5-7/h1-5H	C12H5Br5O	564.691
DTXSID40888243	2-Butenediamide, N1,N4-bis(2,4,6-tribromophenyl)-, (2E)-	92484-07-6	IJUNKLAVMFKPCX-OWOJBTEDSA-N	BrC1=CC(Br)=C(NC(=O)\C=C\C(=O)NC2=C(Br)C=C(Br)C=C2Br)C(Br)=C1	BrC1=CC(Br)=C(NC(=O)C=CC(=O)NC2=C(Br)C=C(Br)C=C2Br)C(Br)=C1,"BrC1=CC(Br)=C(NC(=O)\\C=C\\C(=O)NC2=C(Br)C=C(Br)C=C2Br)C(Br)=C1"	InChI=1S/C16H8Br6N2O2/c17-7-3-9(19)15(10(20)4-7)23-13(25)1-2-14(26)24-16-11(21)5-8(18)6-12(16)22/h1-6H,(H,23,25)(H,24,26)/b2-1+	C16H8Br6N2O2	739.676
DTXSID40185608	p-Tetradecachloroterphenyl	31710-32-4	RDPZHEBCVNFPIH-UHFFFAOYSA-N	ClC1=C(Cl)C(Cl)=C(C(Cl)=C1Cl)C1=C(Cl)C(Cl)=C(C(Cl)=C1Cl)C1=C(Cl)C(Cl)=C(Cl)C(Cl)=C1Cl	ClC1=C(Cl)C(Cl)=C(C(Cl)=C1Cl)C1=C(Cl)C(Cl)=C(C(Cl)=C1Cl)C1=C(Cl)C(Cl)=C(Cl)C(Cl)=C1Cl	InChI=1S/C18Cl14/c19-5-1(3-9(23)13(27)17(31)14(28)10(3)24)6(20)8(22)2(7(5)21)4-11(25)15(29)18(32)16(30)12(4)26	C18Cl14	712.5
DTXSID00879930	BDE-122	446254-82-6	CDNHGSPFIUITTN-UHFFFAOYSA-N	BrC1=CC=CC(OC2=CC(Br)=C(Br)C(Br)=C2)=C1Br	BrC1=CC=CC(OC2=CC(Br)=C(Br)C(Br)=C2)=C1Br	InChI=1S/C12H5Br5O/c13-7-2-1-3-10(12(7)17)18-6-4-8(14)11(16)9(15)5-6/h1-5H	C12H5Br5O	564.691
DTXSID1068720	Phosphonium, tetrakis(hydroxymethyl)-, ethanedioate (2:1) (salt)	52221-67-7	ZYNUSOWWGMTZHH-UHFFFAOYSA-L	[O-]C(=O)C([O-])=O.OC[P+](CO)(CO)CO.OC[P+](CO)(CO)CO	OCP(CO)(CO)CO	InChI=1S/2C4H12O4P.C2H2O4/c2*5-1-9(2-6,3-7)4-8;3-1(4)2(5)6/h2*5-8H,1-4H2;(H,3,4)(H,5,6)/q2*+1;/p-2	C10H24O12P2	398.238
DTXSID70879927	BDE-115	446254-78-0	BKTLDVXDOVSTEV-UHFFFAOYSA-N	BrC1=CC=C(OC2=C(Br)C(Br)=C(Br)C=C2Br)C=C1	BrC1=CC=C(OC2=C(Br)C(Br)=C(Br)C=C2Br)C=C1	InChI=1S/C12H5Br5O/c13-6-1-3-7(4-2-6)18-12-9(15)5-8(14)10(16)11(12)17/h1-5H	C12H5Br5O	564.691
DTXSID9040215	Dimethyl (3-((hydroxymethyl)amino)-3-oxopropyl)phosphonate	20120-33-6	MCONGYNHPPCHSD-UHFFFAOYSA-N	COP(=O)(CCC(=O)NCO)OC	COP(=O)(CCC(=O)NCO)OC	InChI=1S/C6H14NO5P/c1-11-13(10,12-2)4-3-6(9)7-5-8/h8H,3-5H2,1-2H3,(H,7,9)	C6H14NO5P	211.154
DTXSID501016675	(+)-alpha-Hexabromocyclododecane	138257-19-9	DEIGXXQKDWULML-URIQBSJHSA-N	Br[C@H]1CC[C@@H](Br)[C@@H](Br)CC[C@H](Br)[C@H](Br)CC[C@@H]1Br	Br[C@H]1CC[C@@H](Br)[C@@H](Br)CC[C@H](Br)[C@H](Br)CC[C@@H]1Br,BrC1CCC(Br)C(Br)CCC(Br)C(Br)CCC1Br	InChI=1S/C12H18Br6/c13-7-1-2-8(14)10(16)5-6-12(18)11(17)4-3-9(7)15/h7-12H,1-6H2/t7-,8-,9+,10+,11-,12-/m0/s1	C12H18Br6	641.7
DTXSID40109400	Phosphinic acid, P,P-diethyl-, zinc salt (2:1)	284685-45-6
DTXSID6023028	Etidronic acid	2809-21-4	DBVJJBKOTRCVKF-UHFFFAOYSA-N	CC(O)(P(O)(O)=O)P(O)(O)=O	CC(O)(P(O)(O)=O)P(O)(O)=O	InChI=1S/C2H8O7P2/c1-2(3,10(4,5)6)11(7,8)9/h3H,1H3,(H2,4,5,6)(H2,7,8,9)	C2H8O7P2	206.027
DTXSID40879919	BDE-107	446254-70-2	OMGVAMFMRSETEG-UHFFFAOYSA-N	BrC1=CC(Br)=C(Br)C(OC2=CC(Br)=C(Br)C=C2)=C1	BrC1=CC(Br)=C(Br)C(OC2=CC(Br)=C(Br)C=C2)=C1	InChI=1S/C12H5Br5O/c13-6-3-10(16)12(17)11(4-6)18-7-1-2-8(14)9(15)5-7/h1-5H	C12H5Br5O	564.691
DTXSID1059072	4,4'-dibromo-1,1'-Biphenyl	92-86-4	HQJQYILBCQPYBI-UHFFFAOYSA-N	BrC1=CC=C(C=C1)C1=CC=C(Br)C=C1	BrC1=CC=C(C=C1)C1=CC=C(Br)C=C1	InChI=1S/C12H8Br2/c13-11-5-1-9(2-6-11)10-3-7-12(14)8-4-10/h1-8H	C12H8Br2	312.004
DTXSID40858926	2,2',3,3',4,4'-Hexabromo-1,1'-biphenyl	82865-89-2	PTJQVJQAZSLKJO-UHFFFAOYSA-N	BrC1=C(Br)C(Br)=C(C=C1)C1=C(Br)C(Br)=C(Br)C=C1	BrC1=C(Br)C(Br)=C(C=C1)C1=C(Br)C(Br)=C(Br)C=C1	InChI=1S/C12H4Br6/c13-7-3-1-5(9(15)11(7)17)6-2-4-8(14)12(18)10(6)16/h1-4H	C12H4Br6	627.588
DTXSID0020078	Ammonium chloride	12125-02-9	NLXLAEXVIDQMFP-UHFFFAOYSA-N	[NH4+].[Cl-]		InChI=1S/ClH.H3N/h1H;1H3	ClH4N	53.49
DTXSID20879856	BDE-21	337513-67-4	RXWRVYYPLRPDOS-UHFFFAOYSA-N	BrC1=CC=C(OC2=CC=CC=C2)C(Br)=C1Br	BrC1=CC=C(OC2=CC=CC=C2)C(Br)=C1Br	InChI=1S/C12H7Br3O/c13-9-6-7-10(12(15)11(9)14)16-8-4-2-1-3-5-8/h1-7H	C12H7Br3O	406.899
DTXSID80872787	1,3,5-Triazine-2,4,6-triamine monophosphate	20208-95-1	XFZRQAZGUOTJCS-UHFFFAOYSA-N	OP(O)(O)=O.NC1=NC(N)=NC(N)=N1	NC1=NC(N)=NC(N)=N1	InChI=1S/C3H6N6.H3O4P/c4-1-7-2(5)9-3(6)8-1;1-5(2,3)4/h(H6,4,5,6,7,8,9);(H3,1,2,3,4)	C3H9N6O4P	224.117
DTXSID20879937	BDE-132	446254-90-6	FFEKBOKDYRZGRV-UHFFFAOYSA-N	BrC1=C(Br)C(Br)=C(OC2=C(Br)C=CC(Br)=C2Br)C=C1	BrC1=C(Br)C(Br)=C(OC2=C(Br)C=CC(Br)=C2Br)C=C1	InChI=1S/C12H4Br6O/c13-5-3-4-8(11(18)9(5)16)19-12-7(15)2-1-6(14)10(12)17/h1-4H	C12H4Br6O	643.587
DTXSID20786910	1,2,3,4-Tetrabromo-5-(3,4-dibromophenoxy)benzene	405237-85-6	JSDPCMJWYRDQEV-UHFFFAOYSA-N	BrC1=C(Br)C=C(OC2=CC(Br)=C(Br)C(Br)=C2Br)C=C1	BrC1=C(Br)C=C(OC2=CC(Br)=C(Br)C(Br)=C2Br)C=C1	InChI=1S/C12H4Br6O/c13-6-2-1-5(3-7(6)14)19-9-4-8(15)10(16)12(18)11(9)17/h1-4H	C12H4Br6O	643.587
DTXSID4074770	PBB 077	77102-82-0	BVGDXTYHVRFEQZ-UHFFFAOYSA-N	BrC1=C(Br)C=C(C=C1)C1=CC(Br)=C(Br)C=C1	BrC1=C(Br)C=C(C=C1)C1=CC(Br)=C(Br)C=C1	InChI=1S/C12H6Br4/c13-9-3-1-7(5-11(9)15)8-2-4-10(14)12(16)6-8/h1-6H	C12H6Br4	469.796
DTXSID30573656	1,1'-[Oxybis(methylene)]bis(pentabromobenzene)	497107-13-8	GYYJNXRFVBJOEW-UHFFFAOYSA-N	BrC1=C(Br)C(Br)=C(COCC2=C(Br)C(Br)=C(Br)C(Br)=C2Br)C(Br)=C1Br	BrC1=C(Br)C(Br)=C(COCC2=C(Br)C(Br)=C(Br)C(Br)=C2Br)C(Br)=C1Br	InChI=1S/C14H4Br10O/c15-5-3(6(16)10(20)13(23)9(5)19)1-25-2-4-7(17)11(21)14(24)12(22)8(4)18/h1-2H2	C14H4Br10O	987.225
DTXSID20219339	1,1'-Biphenyl, 2,2',3,3',4,4',5,6'-octabromo-	69278-61-1	MOIDFYBXINJWHO-UHFFFAOYSA-N	BrC1=CC(Br)=C(Br)C(Br)=C1C1=CC(Br)=C(Br)C(Br)=C1Br	BrC1=CC(Br)=C(Br)C(Br)=C1C1=CC(Br)=C(Br)C(Br)=C1Br	InChI=1S/C12H2Br8/c13-4-2-6(15)9(17)11(19)7(4)3-1-5(14)10(18)12(20)8(3)16/h1-2H	C12H2Br8	785.38
DTXSID60879951	BDE-148	446255-03-4	OJMHGSMSQZEBFH-UHFFFAOYSA-N	BrC1=CC(Br)=C(OC2=CC(Br)=CC(Br)=C2Br)C(Br)=C1	BrC1=CC(Br)=C(OC2=CC(Br)=CC(Br)=C2Br)C(Br)=C1	InChI=1S/C12H4Br6O/c13-5-2-8(16)12(9(17)3-5)19-10-4-6(14)1-7(15)11(10)18/h1-4H	C12H4Br6O	643.587
DTXSID50879960	BDE-161	446255-12-5	WEYWRBBPPKSRGU-UHFFFAOYSA-N	BrC1=CC(OC2=C(Br)C=C(Br)C(Br)=C2Br)=CC(Br)=C1	BrC1=CC(OC2=C(Br)C=C(Br)C(Br)=C2Br)=CC(Br)=C1	InChI=1S/C12H4Br6O/c13-5-1-6(14)3-7(2-5)19-12-9(16)4-8(15)10(17)11(12)18/h1-4H	C12H4Br6O	643.587
DTXSID5024348	2',3,4-Tribromodiphenyl ether	147217-78-5	BUQBQEYUVAKJQK-UHFFFAOYSA-N	BrC1=CC=C(OC2=C(Br)C=CC=C2)C=C1Br	BrC1=CC=C(OC2=C(Br)C=CC=C2)C=C1Br	InChI=1S/C12H7Br3O/c13-9-6-5-8(7-11(9)15)16-12-4-2-1-3-10(12)14/h1-7H	C12H7Br3O	406.899
DTXSID60872765	Mixed esters of phosphoric acid with [1,​1'-​biphenyl]​-​4,​4'-​diol and phenol	1003300-73-9
DTXSID501016706	(rel)-(1R,2R,3S,4S)-1,2,3,9-tetrabromo-1,2,3,4-tetrahydro-1,4-methanonaphthalene	855992-98-2	YQOLUCYVQSZPIT-XSCZHNOTSA-N	[H]C1(Br)[C@]2([H])[C@H](Br)[C@@H](Br)[C@@]1(Br)C1=CC=CC=C21	[H]C1(Br)[C@]2([H])[C@H](Br)[C@@H](Br)[C@@]1(Br)C1=CC=CC=C21,BrC1C(Br)C2(Br)C(Br)C1C1=C2C=CC=C1	InChI=1/C11H8Br4/c12-8-7-5-3-1-2-4-6(5)11(15,9(7)13)10(8)14/h1-4,7-10H/t7-,8-,9?,10+,11+/s2	C11H8Br4	459.801
DTXSID6051770	Bis(2-ethylhexyl) phenyl phosphate	16368-97-1	ZXZYMQCBRZBVIC-UHFFFAOYSA-N	CCCCC(CC)COP(=O)(OCC(CC)CCCC)OC1=CC=CC=C1	CCCCC(CC)COP(=O)(OCC(CC)CCCC)OC1=CC=CC=C1	InChI=1/C22H39O4P/c1-5-9-14-20(7-3)18-24-27(23,26-22-16-12-11-13-17-22)25-19-21(8-4)15-10-6-2/h11-13,16-17,20-21H,5-10,14-15,18-19H2,1-4H3	C22H39O4P	398.524
DTXSID4021420	Sodium tungsten oxide (Na2WO4)	13472-45-2
DTXSID90879888	BDE-67	446254-37-1	OARGWSONVLGXQA-UHFFFAOYSA-N	BrC1=CC=CC(OC2=CC(Br)=C(Br)C=C2Br)=C1	BrC1=CC=CC(OC2=CC(Br)=C(Br)C=C2Br)=C1	InChI=1S/C12H6Br4O/c13-7-2-1-3-8(4-7)17-12-6-10(15)9(14)5-11(12)16/h1-6H	C12H6Br4O	485.795
DTXSID9030048	2,2',4,4',5-Pentabromodiphenyl ether	60348-60-9	WHPVYXDFIXRKLN-UHFFFAOYSA-N	BrC1=CC(Br)=C(OC2=C(Br)C=C(Br)C(Br)=C2)C=C1	BrC1=CC(Br)=C(OC2=C(Br)C=C(Br)C(Br)=C2)C=C1	InChI=1S/C12H5Br5O/c13-6-1-2-11(9(16)3-6)18-12-5-8(15)7(14)4-10(12)17/h1-5H	C12H5Br5O	564.691
DTXSID3051250	Polyvinylidene chloride	9002-85-1		ClC(Cl)(-*)C-* |$;;;star_e;;star_e$,lp:0:3,2:3,Sg:n:2,0,3,1,4,5::ht|			(C2H2Cl2)n
DTXSID9068328	1,3,5-Triazine-2,4,6-triamine, phosphate	41583-09-9
DTXSID60872801	2,2-Bis(3,5-dibromo-4-hydroxyphenyl)propane-phosgene copolymer	28906-13-0
DTXSID60108955	Polyphosphoric acids, compds. with piperazine	383905-85-9
DTXSID1074252	1-Propanol, 3,3'-oxybis[2,2-bis(bromomethyl)-	109678-33-3	PSOOUFUNTVOUML-UHFFFAOYSA-N	OCC(CBr)(CBr)COCC(CO)(CBr)CBr	OCC(CBr)(CBr)COCC(CO)(CBr)CBr	InChI=1S/C10H18Br4O3/c11-1-9(2-12,5-15)7-17-8-10(3-13,4-14)6-16/h15-16H,1-8H2	C10H18Br4O3	505.867
DTXSID7073486	Benzene, bromophenoxy-	7025-06-1	RRWFUWRLNIZICP-UHFFFAOYSA-N	BrC1=C(OC2=CC=CC=C2)C=CC=C1	BrC1=C(OC2=CC=CC=C2)C=CC=C1	InChI=1S/C12H9BrO/c13-11-8-4-5-9-12(11)14-10-6-2-1-3-7-10/h1-9H	C12H9BrO	249.107
DTXSID60872422	Long-chain chlorinated paraffins (C18-20)	NOCAS_872422
DTXSID60872265	2,2',3,4,4',5'-Hexabromodiphenyl Ether	182677-30-1	IZFQCEZFGCMHOM-UHFFFAOYSA-N	BrC1=CC=C(OC2=CC(Br)=C(Br)C=C2Br)C(Br)=C1Br	BrC1=CC=C(OC2=CC(Br)=C(Br)C=C2Br)C(Br)=C1Br	InChI=1S/C12H4Br6O/c13-5-1-2-9(12(18)11(5)17)19-10-4-7(15)6(14)3-8(10)16/h1-4H	C12H4Br6O	643.587
DTXSID1025017	Dicumyl peroxide	80-43-3	XMNIXWIUMCBBBL-UHFFFAOYSA-N	CC(C)(OOC(C)(C)C1=CC=CC=C1)C1=CC=CC=C1	CC(C)(OOC(C)(C)C1=CC=CC=C1)C1=CC=CC=C1	InChI=1S/C18H22O2/c1-17(2,15-11-7-5-8-12-15)19-20-18(3,4)16-13-9-6-10-14-16/h5-14H,1-4H3	C18H22O2	270.372
DTXSID3027615	Tris(2-chloropropyl) phosphate	6145-73-9	GTRSAMFYSUBAGN-UHFFFAOYSA-N	CC(Cl)COP(=O)(OCC(C)Cl)OCC(C)Cl	CC(Cl)COP(=O)(OCC(C)Cl)OCC(C)Cl	InChI=1/C9H18Cl3O4P/c1-7(10)4-14-17(13,15-5-8(2)11)16-6-9(3)12/h7-9H,4-6H2,1-3H3	C9H18Cl3O4P	327.56
DTXSID20879952	BDE-149	446255-04-5	UJOUSZKYGGTPFQ-UHFFFAOYSA-N	BrC1=CC(Br)=C(OC2=C(Br)C=CC(Br)=C2Br)C=C1Br	BrC1=CC(Br)=C(OC2=C(Br)C=CC(Br)=C2Br)C=C1Br	InChI=1S/C12H4Br6O/c13-5-1-2-6(14)12(11(5)18)19-10-4-8(16)7(15)3-9(10)17/h1-4H	C12H4Br6O	643.587
DTXSID5052705	1,3,5-Tribromo-2-(2,3-dibromopropoxy)benzene	35109-60-5	QXWYPAKUEHGJSG-UHFFFAOYSA-N	BrCC(Br)COC1=C(Br)C=C(Br)C=C1Br	BrCC(Br)COC1=C(Br)C=C(Br)C=C1Br	InChI=1/C9H7Br5O/c10-3-6(12)4-15-9-7(13)1-5(11)2-8(9)14/h1-2,6H,3-4H2	C9H7Br5O	530.674
DTXSID60583561	1,2,3,4,5-Pentabromo-6-(2,4-dibromophenoxy)benzene	189084-67-1	GVNRIAPLVGNZPL-UHFFFAOYSA-N	BrC1=CC(Br)=C(OC2=C(Br)C(Br)=C(Br)C(Br)=C2Br)C=C1	BrC1=CC(Br)=C(OC2=C(Br)C(Br)=C(Br)C(Br)=C2Br)C=C1	InChI=1S/C12H3Br7O/c13-4-1-2-6(5(14)3-4)20-12-10(18)8(16)7(15)9(17)11(12)19/h1-3H	C12H3Br7O	722.483
DTXSID10201783	Dibromodiphenyl ether	53563-56-7
DTXSID00219337	1,1'-Biphenyl, 2,2',3,4',5',6-hexabromo-	69278-59-7	IKIIHEWEIKDZIG-UHFFFAOYSA-N	BrC1=CC(Br)=C(Br)C=C1C1=C(Br)C=CC(Br)=C1Br	BrC1=CC(Br)=C(Br)C=C1C1=C(Br)C=CC(Br)=C1Br	InChI=1S/C12H4Br6/c13-6-1-2-7(14)12(18)11(6)5-3-9(16)10(17)4-8(5)15/h1-4H	C12H4Br6	627.588
DTXSID7039672	Phosphate	14265-44-2	NBIIXXVUZAFLBC-UHFFFAOYSA-K	[O-]P([O-])([O-])=O		InChI=1S/H3O4P/c1-5(2,3)4/h(H3,1,2,3,4)/p-3	O4P	94.971
DTXSID10879926	BDE-114	446254-77-9	SFNAUTSNWPPDSY-UHFFFAOYSA-N	BrC1=CC=C(OC2=C(Br)C(Br)=C(Br)C(Br)=C2)C=C1	BrC1=CC=C(OC2=C(Br)C(Br)=C(Br)C(Br)=C2)C=C1	InChI=1S/C12H5Br5O/c13-6-1-3-7(4-2-6)18-9-5-8(14)10(15)12(17)11(9)16/h1-5H	C12H5Br5O	564.691
DTXSID6044939	1,3,5-Tribromo-2-methoxy-4-methylbenzene	41424-36-6	NMPPAMFEYWGNCI-UHFFFAOYSA-N	COC1=C(Br)C(C)=C(Br)C=C1Br	COC1=C(Br)C(C)=C(Br)C=C1Br	InChI=1S/C8H7Br3O/c1-4-5(9)3-6(10)8(12-2)7(4)11/h3H,1-2H3	C8H7Br3O	358.855
DTXSID90534622	1,1'-Oxybis(3-bromobenzene)	6903-63-5	ALSVFJIXSNRBLE-UHFFFAOYSA-N	BrC1=CC=CC(OC2=CC(Br)=CC=C2)=C1	BrC1=CC=CC(OC2=CC(Br)=CC=C2)=C1	InChI=1S/C12H8Br2O/c13-9-3-1-5-11(7-9)15-12-6-2-4-10(14)8-12/h1-8H	C12H8Br2O	328.003
DTXSID30885564	Phenol, 4,4'-(1-methylethylidene)bis[2,6-dibromo-, 1,1'-diacetate	33798-02-6	ZUBOJXBQSZDOID-UHFFFAOYSA-N	CC(=O)OC1=C(Br)C=C(C=C1Br)C(C)(C)C1=CC(Br)=C(OC(C)=O)C(Br)=C1	CC(=O)OC1=C(Br)C=C(C=C1Br)C(C)(C)C1=CC(Br)=C(OC(C)=O)C(Br)=C1	InChI=1S/C19H16Br4O4/c1-9(24)26-17-13(20)5-11(6-14(17)21)19(3,4)12-7-15(22)18(16(23)8-12)27-10(2)25/h5-8H,1-4H3	C19H16Br4O4	627.949
DTXSID50879884	BDE-62	446254-33-7	YIQYWYZZLOZVRM-UHFFFAOYSA-N	BrC1=CC(Br)=C(OC2=CC=CC=C2)C(Br)=C1Br	BrC1=CC(Br)=C(OC2=CC=CC=C2)C(Br)=C1Br	InChI=1S/C12H6Br4O/c13-8-6-9(14)12(11(16)10(8)15)17-7-4-2-1-3-5-7/h1-6H	C12H6Br4O	485.795
DTXSID201009900	2,2',5,5'-Tetrabromobiphenyl	59080-37-4	XEFMFJLRXHQLEM-UHFFFAOYSA-N	BrC1=CC(=C(Br)C=C1)C1=C(Br)C=CC(Br)=C1	BrC1=CC(=C(Br)C=C1)C1=C(Br)C=CC(Br)=C1	InChI=1S/C12H6Br4/c13-7-1-3-11(15)9(5-7)10-6-8(14)2-4-12(10)16/h1-6H	C12H6Br4	469.796
DTXSID30892415	Sodium hexahydroxyantimonate(1-)	33908-66-6	DTXHJOWJINZJIO-UHFFFAOYSA-H	[OH-].[OH-].[OH-].[OH-].[OH-].[OH-].[Na+].[Sb+5]		InChI=1S/Na.6H2O.Sb/h;6*1H2;/q+1;;;;;;;+5/p-6	H6NaO6Sb	246.792
DTXSID00477016	Benzene, 1,3-dibromo-2-phenoxy-	51930-04-2	MUVDKHMQIZJFTC-UHFFFAOYSA-N	BrC1=CC=CC(Br)=C1OC1=CC=CC=C1	BrC1=CC=CC(Br)=C1OC1=CC=CC=C1	InChI=1S/C12H8Br2O/c13-10-7-4-8-11(14)12(10)15-9-5-2-1-3-6-9/h1-8H	C12H8Br2O	328.003
DTXSID70879866	BDE-40	337513-77-6	SXSUUFZWSVMTRL-UHFFFAOYSA-N	BrC1=CC=CC(OC2=CC=CC(Br)=C2Br)=C1Br	BrC1=CC=CC(OC2=CC=CC(Br)=C2Br)=C1Br	InChI=1S/C12H6Br4O/c13-7-3-1-5-9(11(7)15)17-10-6-2-4-8(14)12(10)16/h1-6H	C12H6Br4O	485.795
DTXSID701029840	Tetrabromotrichloromethylbenzene	198126-86-2
DTXSID6064793	Magnesium carbonate hydroxide (Mg5(CO3)​4(OH)​2)	7760-50-1
DTXSID80879933	BDE-125	446254-85-9	SESXKFPOVUVGLR-UHFFFAOYSA-N	BrC1=CC(OC2=C(Br)C=CC=C2Br)=CC(Br)=C1Br	BrC1=CC(OC2=C(Br)C=CC=C2Br)=CC(Br)=C1Br	InChI=1S/C12H5Br5O/c13-7-2-1-3-8(14)12(7)18-6-4-9(15)11(17)10(16)5-6/h1-5H	C12H5Br5O	564.691
DTXSID601010963	Slack Wax (petroleum), chloro	2097144-44-8
DTXSID50879905	BDE-89	446254-56-4	XGFLJLJXVIMCNR-UHFFFAOYSA-N	BrC1=CC=C(OC2=C(Br)C=CC=C2Br)C(Br)=C1Br	BrC1=CC=C(OC2=C(Br)C=CC=C2Br)C(Br)=C1Br	InChI=1S/C12H5Br5O/c13-6-4-5-9(11(17)10(6)16)18-12-7(14)2-1-3-8(12)15/h1-5H	C12H5Br5O	564.691
DTXSID8047507	Perbromo-1,4-diphenoxybenzene	58965-66-5	YMIUHIAWWDYGGU-UHFFFAOYSA-N	BrC1=C(Br)C(Br)=C(OC2=C(Br)C(Br)=C(OC3=C(Br)C(Br)=C(Br)C(Br)=C3Br)C(Br)=C2Br)C(Br)=C1Br	BrC1=C(Br)C(Br)=C(OC2=C(Br)C(Br)=C(OC3=C(Br)C(Br)=C(Br)C(Br)=C3Br)C(Br)=C2Br)C(Br)=C1Br	InChI=1S/C18Br14O2/c19-1-3(21)7(25)15(8(26)4(1)22)33-17-11(29)13(31)18(14(32)12(17)30)34-16-9(27)5(23)2(20)6(24)10(16)28	C18Br14O2	1366.85
DTXSID3068043	1,3,5-Triazine-2,4,6(1H,3H,5H)-trione, compd. with 1,3,5-triazine-2,4,6-triamine (1:1)	37640-57-6	ZQKXQUJXLSSJCH-UHFFFAOYSA-N	NC1=NC(N)=NC(N)=N1.O=C1NC(=O)NC(=O)N1		InChI=1S/C3H6N6.C3H3N3O3/c4-1-7-2(5)9-3(6)8-1;7-1-4-2(8)6-3(9)5-1/h(H6,4,5,6,7,8,9);(H3,4,5,6,7,8,9)	C6H9N9O3	255.198
DTXSID1069455	2,4,8,10-Tetraoxa-3,9-diphosphaspiro[5.5]undecane, 3,9-bis[3-bromo-2,2-bis(bromomethyl)propoxy]-, 3,9-dioxide	61090-89-9	UASQAKNFTHVEDR-UHFFFAOYSA-N	BrCC(CBr)(CBr)COP1(=O)OCC2(CO1)COP(=O)(OCC(CBr)(CBr)CBr)OC2	BrCC(CBr)(CBr)COP1(=O)OCC2(CO1)COP(=O)(OCC(CBr)(CBr)CBr)OC2	InChI=1S/C15H24Br6O8P2/c16-1-13(2-17,3-18)7-24-30(22)26-9-15(10-27-30)11-28-31(23,29-12-15)25-8-14(4-19,5-20)6-21/h1-12H2	C15H24Br6O8P2	873.721
DTXSID8052697	2,3,5,6-Tetrabromo-p-xylene	23488-38-2	RXKOKVQKECXYOT-UHFFFAOYSA-N	CC1=C(Br)C(Br)=C(C)C(Br)=C1Br	CC1=C(Br)C(Br)=C(C)C(Br)=C1Br	InChI=1S/C8H6Br4/c1-3-5(9)7(11)4(2)8(12)6(3)10/h1-2H3	C8H6Br4	421.752
DTXSID70928904	Diphosphoric acid--1,3,5-triazinane-2,4,6-triimine (1/2)	13518-93-9	CZQYVJUCYIRDFR-UHFFFAOYSA-N	OP(O)(=O)OP(O)(O)=O.N=C1NC(=N)NC(=N)N1.N=C1NC(=N)NC(=N)N1	NC1=NC(N)=NC(N)=N1	InChI=1S/2C3H6N6.H4O7P2/c2*4-1-7-2(5)9-3(6)8-1;1-8(2,3)7-9(4,5)6/h2*(H6,4,5,6,7,8,9);(H2,1,2,3)(H2,4,5,6)	C6H16N12O7P2	430.219
DTXSID9024015	4,4'-Dibromodiphenyl ether	2050-47-7	YAWIAFUBXXPJMQ-UHFFFAOYSA-N	BrC1=CC=C(OC2=CC=C(Br)C=C2)C=C1	BrC1=CC=C(OC2=CC=C(Br)C=C2)C=C1	InChI=1S/C12H8Br2O/c13-9-1-5-11(6-2-9)15-12-7-3-10(14)4-8-12/h1-8H	C12H8Br2O	328.003
DTXSID9026261	Tris(1,3-dichloro-2-propyl) phosphate	13674-87-8	ASLWPAWFJZFCKF-UHFFFAOYSA-N	ClCC(CCl)OP(=O)(OC(CCl)CCl)OC(CCl)CCl	ClCC(CCl)OP(=O)(OC(CCl)CCl)OC(CCl)CCl	InChI=1S/C9H15Cl6O4P/c10-1-7(2-11)17-20(16,18-8(3-12)4-13)19-9(5-14)6-15/h7-9H,1-6H2	C9H15Cl6O4P	430.89
DTXSID6024129	Hexabromodiphenyl ether	36483-60-0		[*]C1=C([*])C([*])=C(OC2=C([*])C([*])=C([*])C([*])=C2[*])C([*])=C1[*] |$_R1;;;_R1;;_R1;;;;;_R1;;_R1;;_R1;;_R1;;_R1;;_R1;;_R1$,c:1,8,16,21,t:5,12,lp:7:2,RG:_R1={Br* |$;_AP1$,lp:0:2|},LOG={_R1:;H;6}|
DTXSID70195215	1,1':2',1''-Terphenyl, 2,2'',3,3',3'',4,4',4'',5,5',5'',6,6',6''-tetradecachloro-	42429-88-9	AJXJXJFNFUNEKT-UHFFFAOYSA-N	ClC1=C(Cl)C(Cl)=C(C(Cl)=C1Cl)C1=C(C(Cl)=C(Cl)C(Cl)=C1Cl)C1=C(Cl)C(Cl)=C(Cl)C(Cl)=C1Cl	ClC1=C(Cl)C(Cl)=C(C(Cl)=C1Cl)C1=C(C(Cl)=C(Cl)C(Cl)=C1Cl)C1=C(Cl)C(Cl)=C(Cl)C(Cl)=C1Cl	InChI=1S/C18Cl14/c19-5-1(3-7(21)13(27)17(31)14(28)8(3)22)2(6(20)12(26)11(5)25)4-9(23)15(29)18(32)16(30)10(4)24	C18Cl14	712.5
DTXSID9028912	Quaternary ammonium compounds, bis(hydrogenated tallow alkyl)dimethyl, salts with bentonite	68953-58-2
DTXSID5051733	2,4,6-Tribromoaniline	147-82-0	GVPODVKBTHCGFU-UHFFFAOYSA-N	NC1=C(Br)C=C(Br)C=C1Br	NC1=C(Br)C=C(Br)C=C1Br	InChI=1S/C6H4Br3N/c7-3-1-4(8)6(10)5(9)2-3/h1-2H,10H2	C6H4Br3N	329.817
DTXSID9074775	2,2′,3,3′,4,4′,6,6′-octabromodiphenyl ether	117964-21-3	AAFUUKPTSPVXJH-UHFFFAOYSA-N	BrC1=CC(Br)=C(OC2=C(Br)C(Br)=C(Br)C=C2Br)C(Br)=C1Br	BrC1=CC(Br)=C(OC2=C(Br)C(Br)=C(Br)C=C2Br)C(Br)=C1Br	InChI=1S/C12H2Br8O/c13-3-1-5(15)11(9(19)7(3)17)21-12-6(16)2-4(14)8(18)10(12)20/h1-2H	C12H2Br8O	801.379
DTXSID1051802	Dibutyl chlorendate	1770-80-5	UJAHPBDUQZFDLA-UHFFFAOYSA-N	CCCCOC(=O)C1C(C(=O)OCCCC)C2(Cl)C(Cl)=C(Cl)C1(Cl)C2(Cl)Cl	CCCCOC(=O)C1C(C(=O)OCCCC)C2(Cl)C(Cl)=C(Cl)C1(Cl)C2(Cl)Cl	InChI=1/C17H20Cl6O4/c1-3-5-7-26-13(24)9-10(14(25)27-8-6-4-2)16(21)12(19)11(18)15(9,20)17(16,22)23/h9-10H,3-8H2,1-2H3	C17H20Cl6O4	501.04
DTXSID5044942	1,1'-Sulfonylbis[3,5-dibromo-4-(2,3-dibromopropoxy)benzene]	42757-55-1	CWZVMVIHYSYLSI-UHFFFAOYSA-N	BrCC(Br)COC1=C(Br)C=C(C=C1Br)S(=O)(=O)C1=CC(Br)=C(OCC(Br)CBr)C(Br)=C1	BrCC(Br)COC1=C(Br)C=C(C=C1Br)S(=O)(=O)C1=CC(Br)=C(OCC(Br)CBr)C(Br)=C1	InChI=1/C18H14Br8O4S/c19-5-9(21)7-29-17-13(23)1-11(2-14(17)24)31(27,28)12-3-15(25)18(16(26)4-12)30-8-10(22)6-20/h1-4,9-10H,5-8H2	C18H14Br8O4S	965.6
DTXSID60879971	BDE-174	446255-21-6	VUUWOHUOYUGBEO-UHFFFAOYSA-N	BrC1=CC=C(Br)C(OC2=CC(Br)=C(Br)C(Br)=C2Br)=C1Br	BrC1=CC=C(Br)C(OC2=CC(Br)=C(Br)C(Br)=C2Br)=C1Br	InChI=1S/C12H3Br7O/c13-4-1-2-5(14)12(9(4)17)20-7-3-6(15)8(16)11(19)10(7)18/h1-3H	C12H3Br7O	722.483
DTXSID30949579	1,2,3-Tribromo-4-[(prop-2-en-1-yl)oxy]benzene	2167063-57-0	FJNNYLPBIOZVIQ-UHFFFAOYSA-N	BrC1=C(Br)C(Br)=C(OCC=C)C=C1	BrC1=C(Br)C(Br)=C(OCC=C)C=C1	InChI=1S/C9H7Br3O/c1-2-5-13-7-4-3-6(10)8(11)9(7)12/h2-4H,1,5H2	C9H7Br3O	370.866
DTXSID50879940	BDE-135	446254-93-9	AMGHASDTWACNCS-UHFFFAOYSA-N	BrC1=CC(OC2=C(Br)C=CC(Br)=C2Br)=C(Br)C(Br)=C1	BrC1=CC(OC2=C(Br)C=CC(Br)=C2Br)=C(Br)C(Br)=C1	InChI=1S/C12H4Br6O/c13-5-3-8(16)10(17)9(4-5)19-12-7(15)2-1-6(14)11(12)18/h1-4H	C12H4Br6O	643.587
DTXSID8025830	Pentabromoethane	75-95-6	OGVPXEPSTZMAFF-UHFFFAOYSA-N	BrC(Br)C(Br)(Br)Br	BrC(Br)C(Br)(Br)Br	InChI=1S/C2HBr5/c3-1(4)2(5,6)7/h1H	C2HBr5	424.55
DTXSID4026216	Phosphoric acid, tris(3-methylphenyl) ester	563-04-2	RMLPZKRPSQVRAB-UHFFFAOYSA-N	CC1=CC=CC(OP(=O)(OC2=CC(C)=CC=C2)OC2=CC(C)=CC=C2)=C1	CC1=CC=CC(OP(=O)(OC2=CC(C)=CC=C2)OC2=CC(C)=CC=C2)=C1	InChI=1S/C21H21O4P/c1-16-7-4-10-19(13-16)23-26(22,24-20-11-5-8-17(2)14-20)25-21-12-6-9-18(3)15-21/h4-15H,1-3H3	C21H21O4P	368.369
DTXSID3024233	Nonabromodiphenyl ether	63936-56-1		[*]C1=C([*])C([*])=C(OC2=C([*])C([*])=C([*])C([*])=C2[*])C([*])=C1[*] |$_R1;;;_R1;;_R1;;;;;_R1;;_R1;;_R1;;_R1;;_R1;;_R1;;_R1$,c:1,8,16,21,t:5,12,lp:7:2,RG:_R1={Br* |$;_AP1$,lp:0:3|},LOG={_R1:;H;9}|			C12O	160.131
DTXSID8035681	Ammonium bromide	12124-97-9	SWLVFNYSXGMGBS-UHFFFAOYSA-N	[NH4+].[Br-]		InChI=1S/BrH.H3N/h1H;1H3	BrH4N	97.943
DTXSID001014486	Calcium molybdate(VI)	7789-82-4	ULPVNDJNTSDDLA-UHFFFAOYSA-N	[O--].[O--].[O--].[O--].[Ca++].[Mo+6]		InChI=1S/Ca.Mo.4O/q+2;+6;4*-2	CaMoO4	200.02
DTXSID30708183	1,1'-Oxybis(3,5-dibromobenzene)	103173-66-6	HFIOZJQRZKNPKJ-UHFFFAOYSA-N	BrC1=CC(OC2=CC(Br)=CC(Br)=C2)=CC(Br)=C1	BrC1=CC(OC2=CC(Br)=CC(Br)=C2)=CC(Br)=C1	InChI=1S/C12H6Br4O/c13-7-1-8(14)4-11(3-7)17-12-5-9(15)2-10(16)6-12/h1-6H	C12H6Br4O	485.795
DTXSID20400487	diethylphosphinic acid	813-76-3	KTLIMPGQZDZPSB-UHFFFAOYSA-N	CCP(O)(=O)CC	CCP(O)(=O)CC	InChI=1S/C4H11O2P/c1-3-7(5,6)4-2/h3-4H2,1-2H3,(H,5,6)	C4H11O2P	122.104
DTXSID001002372	Bis[(pentabromophenyl)methyl] 3,4,5,6-tetrabromobenzene-1,2-dicarboxylate	82001-21-6	NIMRNRQNVGDVEU-UHFFFAOYSA-N	BrC1=C(Br)C(Br)=C(COC(=O)C2=C(C(=O)OCC3=C(Br)C(Br)=C(Br)C(Br)=C3Br)C(Br)=C(Br)C(Br)=C2Br)C(Br)=C1Br	BrC1=C(Br)C(Br)=C(COC(=O)C2=C(C(=O)OCC3=C(Br)C(Br)=C(Br)C(Br)=C3Br)C(Br)=C(Br)C(Br)=C2Br)C(Br)=C1Br	InChI=1S/C22H4Br14O4/c23-7-3(8(24)14(30)19(35)13(7)29)1-39-21(37)5-6(12(28)18(34)17(33)11(5)27)22(38)40-2-4-9(25)15(31)20(36)16(32)10(4)26/h1-2H2	C22H4Br14O4	1450.93
DTXSID70275889	Bis(2,3-dibromopropyl) hydrogen phosphate	5412-25-9	CBPKIOGAUWKEFT-UHFFFAOYSA-N	OP(=O)(OCC(Br)CBr)OCC(Br)CBr	OP(=O)(OCC(Br)CBr)OCC(Br)CBr	InChI=1/C6H11Br4O4P/c7-1-5(9)3-13-15(11,12)14-4-6(10)2-8/h5-6H,1-4H2,(H,11,12)	C6H11Br4O4P	497.74
DTXSID5074769	PBB 053	60044-25-9	IMEYSCIEAFLSQJ-UHFFFAOYSA-N	BrC1=CC(=C(Br)C=C1)C1=C(Br)C=CC=C1Br	BrC1=CC(=C(Br)C=C1)C1=C(Br)C=CC=C1Br	InChI=1S/C12H6Br4/c13-7-4-5-9(14)8(6-7)12-10(15)2-1-3-11(12)16/h1-6H	C12H6Br4	469.796
DTXSID60879890	BDE-69	327185-09-1	NHZNRCYNZJADTG-UHFFFAOYSA-N	BrC1=CC=CC(OC2=C(Br)C=C(Br)C=C2Br)=C1	BrC1=CC=CC(OC2=C(Br)C=C(Br)C=C2Br)=C1	InChI=1S/C12H6Br4O/c13-7-2-1-3-9(4-7)17-12-10(15)5-8(14)6-11(12)16/h1-6H	C12H6Br4O	485.795
DTXSID50873928	2,3',4,4',6-Pentabromodiphenyl Ether	189084-66-0	KXEOYBYEJCRPGB-UHFFFAOYSA-N	BrC1=CC(Br)=C(OC2=CC(Br)=C(Br)C=C2)C(Br)=C1	BrC1=CC(Br)=C(OC2=CC(Br)=C(Br)C=C2)C(Br)=C1	InChI=1S/C12H5Br5O/c13-6-3-10(16)12(11(17)4-6)18-7-1-2-8(14)9(15)5-7/h1-5H	C12H5Br5O	564.691
DTXSID501016699	1,1'-sulfonylbis(3,5-dibromo-4-methoxybenzene)	70156-79-5	MVCCPHIOCLZPGZ-UHFFFAOYSA-N	COC1=C(Br)C=C(C=C1Br)S(=O)(=O)C1=CC(Br)=C(OC)C(Br)=C1	COC1=C(Br)C=C(C=C1Br)S(=O)(=O)C1=CC(Br)=C(OC)C(Br)=C1	InChI=1S/C14H10Br4O4S/c1-21-13-9(15)3-7(4-10(13)16)23(19,20)8-5-11(17)14(22-2)12(18)6-8/h3-6H,1-2H3	C14H10Br4O4S	593.91
DTXSID601016692	dimethyl 3,4,5,6-tetrabromobenzene-1,2-dicarboxylate	55481-60-2	GNBQLLNMXUOVRU-UHFFFAOYSA-N	COC(=O)C1=C(Br)C(Br)=C(Br)C(Br)=C1C(=O)OC	COC(=O)C1=C(Br)C(Br)=C(Br)C(Br)=C1C(=O)OC	InChI=1S/C10H6Br4O4/c1-17-9(15)3-4(10(16)18-2)6(12)8(14)7(13)5(3)11/h1-2H3	C10H6Br4O4	509.77
DTXSID30972327	1,2,3,4,7,7-Hexachloro-5-(2,4,6-tribromophenyl)bicyclo[2.2.1]hept-2-ene	56890-89-2	MVQRAJZAYJHOAS-UHFFFAOYSA-N	ClC1=C(Cl)C2(Cl)C(CC1(Cl)C2(Cl)Cl)C1=C(Br)C=C(Br)C=C1Br	ClC1=C(Cl)C2(Cl)C(CC1(Cl)C2(Cl)Cl)C1=C(Br)C=C(Br)C=C1Br	InChI=1/C13H5Br3Cl6/c14-4-1-6(15)8(7(16)2-4)5-3-11(19)9(17)10(18)12(5,20)13(11,21)22/h1-2,5H,3H2	C13H5Br3Cl6	613.6
DTXSID60879870	BDE-44	446254-20-2	VBGBGTYMDIVKNK-UHFFFAOYSA-N	BrC1=CC=C(Br)C(OC2=C(Br)C(Br)=CC=C2)=C1	BrC1=CC=C(Br)C(OC2=C(Br)C(Br)=CC=C2)=C1	InChI=1S/C12H6Br4O/c13-7-4-5-8(14)11(6-7)17-10-3-1-2-9(15)12(10)16/h1-6H	C12H6Br4O	485.795
DTXSID201017117	Tetrakis(hydroxymethyl)phosphonium p-toluenesulfonate	75019-90-8	PFVNNBUNSIRJIV-UHFFFAOYSA-M	OC[P+](CO)(CO)CO.CC1=CC=C(C=C1)S([O-])(=O)=O	OCP(CO)(CO)CO	InChI=1S/C7H8O3S.C4H12O4P/c1-6-2-4-7(5-3-6)11(8,9)10;5-1-9(2-6,3-7)4-8/h2-5H,1H3,(H,8,9,10);5-8H,1-4H2/q;+1/p-1	C11H19O7PS	326.3
DTXSID10865889	Tetrabromobisphenol A dimethyl ether	37853-61-5	XRQKNNNAKHZPSP-UHFFFAOYSA-N	COC1=C(Br)C=C(C=C1Br)C(C)(C)C1=CC(Br)=C(OC)C(Br)=C1	COC1=C(Br)C=C(C=C1Br)C(C)(C)C1=CC(Br)=C(OC)C(Br)=C1	InChI=1S/C17H16Br4O2/c1-17(2,9-5-11(18)15(22-3)12(19)6-9)10-7-13(20)16(23-4)14(21)8-10/h5-8H,1-4H3	C17H16Br4O2	571.929
DTXSID5026259	Tris(2-chloroisopropyl)phosphate	13674-84-5	KVMPUXDNESXNOH-UHFFFAOYSA-N	CC(CCl)OP(=O)(OC(C)CCl)OC(C)CCl	CC(CCl)OP(=O)(OC(C)CCl)OC(C)CCl	InChI=1/C9H18Cl3O4P/c1-7(4-10)14-17(13,15-8(2)5-11)16-9(3)6-12/h7-9H,4-6H2,1-3H3	C9H18Cl3O4P	327.56
DTXSID3025382	Hexabromobiphenyl	36355-01-8		Br*.Br*.Br*.Br*.Br*.Br*.C1=CC=C(C=C1)C1=CC=CC=C1 |c:6,8,10,15,17,t:13,lp:0:3,2:3,4:3,6:3,8:3,10:3,m:1:16.17.12.13.14.19.20.21.22.23,3:16.17.13.14.19.20.21.22.23,5:16.17.12.13.14.19.20.21.22.23,7:16.17.12.13.14.19.20.21.22.23,9:16.17.12.13.14.19.20.21.22.23,11:16.17.12.13.14.19.20.21.22.23|	C1=CC=C(C=C1)C1=CC=CC=C1		C12H4Br6	627.588
DTXSID2029327	Tetrabromobisphenol A diallyl ether	25327-89-3	PWXTUWQHMIFLKL-UHFFFAOYSA-N	CC(C)(C1=CC(Br)=C(OCC=C)C(Br)=C1)C1=CC(Br)=C(OCC=C)C(Br)=C1	CC(C)(C1=CC(Br)=C(OCC=C)C(Br)=C1)C1=CC(Br)=C(OCC=C)C(Br)=C1	InChI=1S/C21H20Br4O2/c1-5-7-26-19-15(22)9-13(10-16(19)23)21(3,4)14-11-17(24)20(18(25)12-14)27-8-6-2/h5-6,9-12H,1-2,7-8H2,3-4H3	C21H20Br4O2	624.005
DTXSID80879852	BDE-9	337513-66-3	URDWJMUOJJSXAE-UHFFFAOYSA-N	BrC1=CC=C(Br)C(OC2=CC=CC=C2)=C1	BrC1=CC=C(Br)C(OC2=CC=CC=C2)=C1	InChI=1S/C12H8Br2O/c13-9-6-7-11(14)12(8-9)15-10-4-2-1-3-5-10/h1-8H	C12H8Br2O	328.003
DTXSID70879907	BDE-91	446254-58-6	HWNJTZKDPNZUSO-UHFFFAOYSA-N	BrC1=CC(Br)=C(OC2=C(Br)C=CC(Br)=C2Br)C=C1	BrC1=CC(Br)=C(OC2=C(Br)C=CC(Br)=C2Br)C=C1	InChI=1S/C12H5Br5O/c13-6-1-4-10(9(16)5-6)18-12-8(15)3-2-7(14)11(12)17/h1-5H	C12H5Br5O	564.691
DTXSID90879924	BDE-112	446254-75-7	MFBMNSFADPTAKZ-UHFFFAOYSA-N	BrC1=CC=CC(OC2=C(Br)C(Br)=CC(Br)=C2Br)=C1	BrC1=CC=CC(OC2=C(Br)C(Br)=CC(Br)=C2Br)=C1	InChI=1S/C12H5Br5O/c13-6-2-1-3-7(4-6)18-12-10(16)8(14)5-9(15)11(12)17/h1-5H	C12H5Br5O	564.691
DTXSID30879928	BDE-117	446254-79-1	SOJBOGWFDBDWEG-UHFFFAOYSA-N	BrC1=CC=C(OC2=C(Br)C(Br)=CC(Br)=C2Br)C=C1	BrC1=CC=C(OC2=C(Br)C(Br)=CC(Br)=C2Br)C=C1	InChI=1S/C12H5Br5O/c13-6-1-3-7(4-2-6)18-12-10(16)8(14)5-9(15)11(12)17/h1-5H	C12H5Br5O	564.691
DTXSID40152375	2,2',3,3',4,5,5',6,6'-Nonobromobiphenyl	119264-63-0	WOYQCNXYPKFHRQ-UHFFFAOYSA-N	BrC1=CC(Br)=C(Br)C(=C1Br)C1=C(Br)C(Br)=C(Br)C(Br)=C1Br	BrC1=CC(Br)=C(Br)C(=C1Br)C1=C(Br)C(Br)=C(Br)C(Br)=C1Br	InChI=1S/C12HBr9/c13-2-1-3(14)7(16)4(6(2)15)5-8(17)10(19)12(21)11(20)9(5)18/h1H	C12HBr9	864.276
DTXSID00879915	BDE-103	446254-67-7	RJEMKRNASVHYKR-UHFFFAOYSA-N	BrC1=CC=C(Br)C(OC2=C(Br)C=C(Br)C=C2Br)=C1	BrC1=CC=C(Br)C(OC2=C(Br)C=C(Br)C=C2Br)=C1	InChI=1S/C12H5Br5O/c13-6-1-2-8(15)11(5-6)18-12-9(16)3-7(14)4-10(12)17/h1-5H	C12H5Br5O	564.691
DTXSID60864948	2-(2-Hydroxyethoxy)ethyl 2-hydroxypropyl 3,4,5,6-tetrabromophthalate	20566-35-2	OQHHASWHOGRCRC-UHFFFAOYSA-N	CC(O)COC(=O)C1=C(Br)C(Br)=C(Br)C(Br)=C1C(=O)OCCOCCO	CC(O)COC(=O)C1=C(Br)C(Br)=C(Br)C(Br)=C1C(=O)OCCOCCO	InChI=1/C15H16Br4O7/c1-7(21)6-26-15(23)9-8(10(16)12(18)13(19)11(9)17)14(22)25-5-4-24-3-2-20/h7,20-21H,2-6H2,1H3	C15H16Br4O7	627.902
DTXSID7042518	Zinc sulfide	1314-98-3	DRDVZXDWVBGGMH-UHFFFAOYSA-N	[S--].[Zn++]		InChI=1S/S.Zn/q-2;+2	SZn	97.44
DTXSID90785733	1,2,3,4,5-Pentabromo-6-(2,5-dibromophenoxy)benzene	405237-86-7	YRNMIFAQDSUFTR-UHFFFAOYSA-N	BrC1=CC(OC2=C(Br)C(Br)=C(Br)C(Br)=C2Br)=C(Br)C=C1	BrC1=CC(OC2=C(Br)C(Br)=C(Br)C(Br)=C2Br)=C(Br)C=C1	InChI=1S/C12H3Br7O/c13-4-1-2-5(14)6(3-4)20-12-10(18)8(16)7(15)9(17)11(12)19/h1-3H	C12H3Br7O	722.483
DTXSID4074774	PBDE 195	446255-38-5	GPQLSLKPHQEEOP-UHFFFAOYSA-N	BrC1=C(Br)C(Br)=C(OC2=C(Br)C(Br)=C(Br)C(Br)=C2Br)C=C1	BrC1=C(Br)C(Br)=C(OC2=C(Br)C(Br)=C(Br)C(Br)=C2Br)C=C1	InChI=1S/C12H2Br8O/c13-3-1-2-4(6(15)5(3)14)21-12-10(19)8(17)7(16)9(18)11(12)20/h1-2H	C12H2Br8O	801.379
DTXSID20879957	BDE-158	446255-09-0	KRYHHTVQOOJNHQ-UHFFFAOYSA-N	BrC1=CC(Br)=C(OC2=CC(Br)=C(Br)C=C2)C(Br)=C1Br	BrC1=CC(Br)=C(OC2=CC(Br)=C(Br)C=C2)C(Br)=C1Br	InChI=1S/C12H4Br6O/c13-6-2-1-5(3-7(6)14)19-12-9(16)4-8(15)10(17)11(12)18/h1-4H	C12H4Br6O	643.587
DTXSID60783706	1,4-Dibromo-2-(3-bromophenoxy)benzene	337513-75-4	VUOBKVBAFJQQDB-UHFFFAOYSA-N	BrC1=CC(OC2=CC(Br)=CC=C2)=C(Br)C=C1	BrC1=CC(OC2=CC(Br)=CC=C2)=C(Br)C=C1	InChI=1S/C12H7Br3O/c13-8-2-1-3-10(6-8)16-12-7-9(14)4-5-11(12)15/h1-7H	C12H7Br3O	406.899
DTXSID1021403	Trimethyl orthophosphate	512-56-1	WVLBCYQITXONBZ-UHFFFAOYSA-N	COP(=O)(OC)OC	COP(=O)(OC)OC	InChI=1S/C3H9O4P/c1-5-8(4,6-2)7-3/h1-3H3	C3H9O4P	140.075
DTXSID00583560	1,3-Dibromo-5-(3-bromophenoxy)benzene	147217-79-6	XUKPJLVONRTECE-UHFFFAOYSA-N	BrC1=CC=CC(OC2=CC(Br)=CC(Br)=C2)=C1	BrC1=CC=CC(OC2=CC(Br)=CC(Br)=C2)=C1	InChI=1S/C12H7Br3O/c13-8-2-1-3-11(5-8)16-12-6-9(14)4-10(15)7-12/h1-7H	C12H7Br3O	406.899
DTXSID30879882	BDE-60	446254-31-5	ARERIMFZYPFJAV-UHFFFAOYSA-N	BrC1=CC=C(OC2=CC=C(Br)C(Br)=C2Br)C=C1	BrC1=CC=C(OC2=CC=C(Br)C(Br)=C2Br)C=C1	InChI=1S/C12H6Br4O/c13-7-1-3-8(4-2-7)17-10-6-5-9(14)11(15)12(10)16/h1-6H	C12H6Br4O	485.795
DTXSID70879922	BDE-110	446254-73-5	LESZGJVTZILBTK-UHFFFAOYSA-N	BrC1=C(Br)C=C(OC2=C(Br)C=CC(Br)=C2Br)C=C1	BrC1=C(Br)C=C(OC2=C(Br)C=CC(Br)=C2Br)C=C1	InChI=1S/C12H5Br5O/c13-7-2-1-6(5-10(7)16)18-12-9(15)4-3-8(14)11(12)17/h1-5H	C12H5Br5O	564.691
DTXSID70675901	4,5,6,7,13,14,15,16,19,19,20,20-Dodecachloroheptacyclo[9.6.1.1~4,7~.1~13,16~.0~2,10~.0~3,8~.0~12,17~]icosa-5,14-diene (non-preferred name)	13560-90-2	COOHPPAZRZIWHM-FETHMUPRSA-N	[H][C@@]12C[C@]3([H])[C@]([H])([C@]1([H])[C@@]1([H])C[C@]2([H])[C@@]2([H])[C@]1([H])[C@@]1(Cl)C(Cl)=C(Cl)[C@]2(Cl)C1(Cl)Cl)[C@]1(Cl)C(Cl)=C(Cl)[C@@]3(Cl)C1(Cl)Cl	[H][C@@]12C[C@]3([H])[C@]([H])([C@]1([H])[C@@]1([H])C[C@]2([H])[C@@]2([H])[C@]1([H])[C@@]1(Cl)C(Cl)=C(Cl)[C@]2(Cl)C1(Cl)Cl)[C@]1(Cl)C(Cl)=C(Cl)[C@@]3(Cl)C1(Cl)Cl,[H]C12CC([H])(C3C1CC1C3C3(Cl)C(Cl)=C(Cl)C1(Cl)C3(Cl)Cl)C1C2C2(Cl)C(Cl)=C(Cl)C1(Cl)C2(Cl)Cl	InChI=1/C20H12Cl12/c21-11-12(22)18(28)10-6(15(11,25)19(18,29)30)2-3-4-1-5(7(3)10)9-8(4)16(26)13(23)14(24)17(9,27)20(16,31)32/h3-10H,1-2H2/t3-,4-,5+,6+,7-,8-,9+,10+,15+,16-,17+,18-/s2	C20H12Cl12	677.72
DTXSID30879908	BDE-92	446254-59-7	QWSQOVAGRDRZLM-UHFFFAOYSA-N	BrC1=CC(OC2=CC(Br)=CC(Br)=C2Br)=C(Br)C=C1	BrC1=CC(OC2=CC(Br)=CC(Br)=C2Br)=C(Br)C=C1	InChI=1S/C12H5Br5O/c13-6-1-2-8(15)10(4-6)18-11-5-7(14)3-9(16)12(11)17/h1-5H	C12H5Br5O	564.691
DTXSID0050471	Barium sulfate	7727-43-7	TZCXTZWJZNENPQ-UHFFFAOYSA-L	[Ba++].[O-]S([O-])(=O)=O		InChI=1S/Ba.H2O4S/c;1-5(2,3)4/h;(H2,1,2,3,4)/q+2;/p-2	BaO4S	233.38
DTXSID50872597	Tin zinc hydroxide (ZnSn(OH)6)	12027-96-2	BHTBHKFULNTCHQ-UHFFFAOYSA-H	[OH-].[OH-].[OH-].[OH-].[OH-].[OH-].[Zn++].[Sn+4]		InChI=1S/6H2O.Sn.Zn/h6*1H2;;/q;;;;;;+4;+2/p-6	H6O6SnZn	286.13
DTXSID70983452	Sodium bis(2,3-dibromopropyl) phosphate	64864-08-0	GETRLKDOQKGVMA-UHFFFAOYSA-M	[Na+].[O-]P(=O)(OCC(Br)CBr)OCC(Br)CBr	OP(=O)(OCC(Br)CBr)OCC(Br)CBr	InChI=1/C6H11Br4O4P.Na/c7-1-5(9)3-13-15(11,12)14-4-6(10)2-8;/h5-6H,1-4H2,(H,11,12);/q;+1/p-1	C6H10Br4NaO4P	519.722
DTXSID40893054	Tribromoneopentyl alcohol	36483-57-5
DTXSID50858856	Disodium stannate	12058-66-1	ZURGJWQTMOPOIB-UHFFFAOYSA-N	[Na+].[Na+].O=[Sn--](=O)=O		InChI=1S/2Na.3O.Sn/q2*+1;;;;-2	Na2O3Sn	212.687
DTXSID00879955	BDE-152	446255-07-8	BYBJJARTBKUIJD-UHFFFAOYSA-N	BrC1=CC(Br)=C(Br)C(OC2=C(Br)C=CC=C2Br)=C1Br	BrC1=CC(Br)=C(Br)C(OC2=C(Br)C=CC=C2Br)=C1Br	InChI=1S/C12H4Br6O/c13-5-2-1-3-6(14)11(5)19-12-9(17)7(15)4-8(16)10(12)18/h1-4H	C12H4Br6O	643.587
DTXSID7035016	Zinc oxide	1314-13-2	RNWHGQJWIACOKP-UHFFFAOYSA-N	[O--].[Zn++]		InChI=1S/O.Zn/q-2;+2	OZn	81.38
DTXSID60477017	2,4,6-Tribromodiphenyl ether	155999-95-4	TVZAPPGLBLTACB-UHFFFAOYSA-N	BrC1=CC(Br)=C(OC2=CC=CC=C2)C(Br)=C1	BrC1=CC(Br)=C(OC2=CC=CC=C2)C(Br)=C1	InChI=1S/C12H7Br3O/c13-8-6-10(14)12(11(15)7-8)16-9-4-2-1-3-5-9/h1-7H	C12H7Br3O	406.899
DTXSID20879912	BDE-97	446254-64-4	MAGYDGJRSCULJL-UHFFFAOYSA-N	BrC1=CC(Br)=C(OC2=CC=CC(Br)=C2Br)C=C1Br	BrC1=CC(Br)=C(OC2=CC=CC(Br)=C2Br)C=C1Br	InChI=1S/C12H5Br5O/c13-6-2-1-3-10(12(6)17)18-11-5-8(15)7(14)4-9(11)16/h1-5H	C12H5Br5O	564.691
DTXSID00879894	BDE-74	446254-42-8	LXCFDVVDUVPAGR-UHFFFAOYSA-N	BrC1=CC=C(OC2=CC(Br)=C(Br)C=C2Br)C=C1	BrC1=CC=C(OC2=CC(Br)=C(Br)C=C2Br)C=C1	InChI=1S/C12H6Br4O/c13-7-1-3-8(4-2-7)17-12-6-10(15)9(14)5-11(12)16/h1-6H	C12H6Br4O	485.795
DTXSID40106732	Benzene, ethenyl-, ar-bromo derivs., homopolymers	148993-99-1
DTXSID00164338	4,4',6,6'-Tetrabromo-2,2'-biphenyldiol	14957-65-4	ZNJKDCNQQCLEFG-UHFFFAOYSA-N	OC1=C(C(Br)=CC(Br)=C1)C1=C(O)C=C(Br)C=C1Br	OC1=C(C(Br)=CC(Br)=C1)C1=C(O)C=C(Br)C=C1Br	InChI=1S/C12H6Br4O2/c13-5-1-7(15)11(9(17)3-5)12-8(16)2-6(14)4-10(12)18/h1-4,17-18H	C12H6Br4O2	501.794
DTXSID8028000	Phosphoric acid, 2,2-bis(chloromethyl)-1,3-propanediyl tetrakis(2-chloroethyl) ester	38051-10-4	ZGHUDSLVQAGWEY-UHFFFAOYSA-N	ClCCOP(=O)(OCCCl)OCC(CCl)(CCl)COP(=O)(OCCCl)OCCCl	ClCCOP(=O)(OCCCl)OCC(CCl)(CCl)COP(=O)(OCCCl)OCCCl	InChI=1S/C13H24Cl6O8P2/c14-1-5-22-28(20,23-6-2-15)26-11-13(9-18,10-19)12-27-29(21,24-7-3-16)25-8-4-17/h1-12H2	C13H24Cl6O8P2	582.97
DTXSID501017085	2,3-Dibromopropylphosphate	5324-12-9	GMAAWZONVLTAMA-UHFFFAOYSA-N	OP(O)(=O)OCC(Br)CBr	OP(O)(=O)OCC(Br)CBr	InChI=1/C3H7Br2O4P/c4-1-3(5)2-9-10(6,7)8/h3H,1-2H2,(H2,6,7,8)	C3H7Br2O4P	297.867
DTXSID00959387	1,2,3,4,5-Pentabromo-6-(bromomethyl)benzene	38521-51-6	PYOIYKRKAHYOKO-UHFFFAOYSA-N	BrCC1=C(Br)C(Br)=C(Br)C(Br)=C1Br	BrCC1=C(Br)C(Br)=C(Br)C(Br)=C1Br	InChI=1S/C7H2Br6/c8-1-2-3(9)5(11)7(13)6(12)4(2)10/h1H2	C7H2Br6	565.517
DTXSID3052692	2,2',4,4',5,6'-Hexabromodiphenyl ether	207122-15-4	VHNPZYZQKWIWOD-UHFFFAOYSA-N	BrC1=CC(Br)=C(OC2=CC(Br)=C(Br)C=C2Br)C(Br)=C1	BrC1=CC(Br)=C(OC2=CC(Br)=C(Br)C=C2Br)C(Br)=C1	InChI=1S/C12H4Br6O/c13-5-1-9(17)12(10(18)2-5)19-11-4-7(15)6(14)3-8(11)16/h1-4H	C12H4Br6O	643.587
DTXSID30879948	BDE-145	446255-01-2	BTKLHMBWCRVCLC-UHFFFAOYSA-N	BrC1=CC(Br)=C(OC2=C(Br)C=CC=C2Br)C(Br)=C1Br	BrC1=CC(Br)=C(OC2=C(Br)C=CC=C2Br)C(Br)=C1Br	InChI=1S/C12H4Br6O/c13-5-2-1-3-6(14)11(5)19-12-8(16)4-7(15)9(17)10(12)18/h1-4H	C12H4Br6O	643.587
DTXSID10229705	Phosphonium, tetrakis(hydroxymethyl)-, 1-naphthalenesulfonate (salt)	79481-21-3	IKTWUMXQVVENPA-UHFFFAOYSA-M	OC[P+](CO)(CO)CO.[O-]S(=O)(=O)C1=CC=CC2=CC=CC=C12		InChI=1S/C10H8O3S.C4H12O4P/c11-14(12,13)10-7-3-5-8-4-1-2-6-9(8)10;5-1-9(2-6,3-7)4-8/h1-7H,(H,11,12,13);5-8H,1-4H2/q;+1/p-1	C14H19O7PS	362.33
DTXSID00207815	2,3,5,6,2',3',5',6'-Octabromobiphenyl	59080-41-0	IQIHDBRYKJLECA-UHFFFAOYSA-N	BrC1=CC(Br)=C(Br)C(=C1Br)C1=C(Br)C(Br)=CC(Br)=C1Br	BrC1=CC(Br)=C(Br)C(=C1Br)C1=C(Br)C(Br)=CC(Br)=C1Br	InChI=1S/C12H2Br8/c13-3-1-4(14)10(18)7(9(3)17)8-11(19)5(15)2-6(16)12(8)20/h1-2H	C12H2Br8	785.38
DTXSID90873927	2,2',4,5'-Tetrabromodiphenyl Ether	243982-82-3	QWVDUBDYUPHNHY-UHFFFAOYSA-N	BrC1=CC(Br)=C(OC2=C(Br)C=CC(Br)=C2)C=C1	BrC1=CC(Br)=C(OC2=C(Br)C=CC(Br)=C2)C=C1	InChI=1S/C12H6Br4O/c13-7-2-4-11(10(16)5-7)17-12-6-8(14)1-3-9(12)15/h1-6H	C12H6Br4O	485.795
DTXSID30879887	BDE-65	446254-36-0	HPEUYVBOPJQVPN-UHFFFAOYSA-N	BrC1=CC(Br)=C(Br)C(OC2=CC=CC=C2)=C1Br	BrC1=CC(Br)=C(Br)C(OC2=CC=CC=C2)=C1Br	InChI=1S/C12H6Br4O/c13-8-6-9(14)11(16)12(10(8)15)17-7-4-2-1-3-5-7/h1-6H	C12H6Br4O	485.795
DTXSID40864926	2,4-Dibromophenyl glycidyl ether	20217-01-0	NFWLWLQSZIJYFR-UHFFFAOYSA-N	BrC1=CC(Br)=C(OCC2CO2)C=C1	BrC1=CC(Br)=C(OCC2CO2)C=C1	InChI=1/C9H8Br2O2/c10-6-1-2-9(8(11)3-6)13-5-7-4-12-7/h1-3,7H,4-5H2	C9H8Br2O2	307.969
DTXSID50192686	2,3,4,5-Tetrabromo-6-chlorotoluene	39569-21-6	WMXWTOJJASZOCL-UHFFFAOYSA-N	CC1=C(Cl)C(Br)=C(Br)C(Br)=C1Br	CC1=C(Cl)C(Br)=C(Br)C(Br)=C1Br	InChI=1S/C7H3Br4Cl/c1-2-3(8)4(9)5(10)6(11)7(2)12/h1H3	C7H3Br4Cl	442.17
DTXSID60879956	BDE-157	446255-08-9	JUOAMVUIJQJZSZ-UHFFFAOYSA-N	BrC1=CC=C(OC2=CC(Br)=C(Br)C(Br)=C2)C(Br)=C1Br	BrC1=CC=C(OC2=CC(Br)=C(Br)C(Br)=C2)C(Br)=C1Br	InChI=1S/C12H4Br6O/c13-6-1-2-9(12(18)11(6)17)19-5-3-7(14)10(16)8(15)4-5/h1-4H	C12H4Br6O	643.587
DTXSID60919462	Tris(3-methylbutyl) phosphate	919-62-0	YQLIHRFKJJQBAF-UHFFFAOYSA-N	CC(C)CCOP(=O)(OCCC(C)C)OCCC(C)C	CC(C)CCOP(=O)(OCCC(C)C)OCCC(C)C	InChI=1S/C15H33O4P/c1-13(2)7-10-17-20(16,18-11-8-14(3)4)19-12-9-15(5)6/h13-15H,7-12H2,1-6H3	C15H33O4P	308.399
DTXSID70107934	Phosphoric acid, triethyl ester, polymer with oxirane and phosphorus oxide (P2O5)	184538-58-7
DTXSID60873772	(+/-)-beta-Hexabromocyclododecane	134237-51-7	DEIGXXQKDWULML-UFVWWTPHSA-N	Br[C@H]1CC[C@@H](Br)[C@@H](Br)CC[C@@H](Br)[C@H](Br)CC[C@H]1Br	Br[C@H]1CC[C@@H](Br)[C@@H](Br)CC[C@@H](Br)[C@H](Br)CC[C@H]1Br,BrC1CCC(Br)C(Br)CCC(Br)C(Br)CCC1Br	InChI=1/C12H18Br6/c13-7-1-2-8(14)10(16)5-6-12(18)11(17)4-3-9(7)15/h7-12H,1-6H2/t7-,8-,9-,10+,11+,12-/s2	C12H18Br6	641.7
DTXSID5020493	Dimethyl phosphonate	868-85-9	HZCDANOFLILNSA-UHFFFAOYSA-N	COP(=O)OC	COP(=O)OC	InChI=1S/C2H7O3P/c1-4-6(3)5-2/h6H,1-2H3	C2H7O3P	110.049
DTXSID60872669	Alkanes, C10-26, chloro	97659-46-6
DTXSID5024639	3-Bromobiphenyl	2113-57-7	USYQKCQEVBFJRP-UHFFFAOYSA-N	BrC1=CC=CC(=C1)C1=CC=CC=C1	BrC1=CC=CC(=C1)C1=CC=CC=C1	InChI=1S/C12H9Br/c13-12-8-4-7-11(9-12)10-5-2-1-3-6-10/h1-9H	C12H9Br	233.108
DTXSID70965470	Tetrakis(hydroxymethyl)phosphanium hydroxide	512-82-3	IOIHFHNPXJFODN-UHFFFAOYSA-M	[OH-].OC[P+](CO)(CO)CO	OCP(CO)(CO)CO	InChI=1S/C4H12O4P.H2O/c5-1-9(2-6,3-7)4-8;/h5-8H,1-4H2;1H2/q+1;/p-1	C4H13O5P	172.117
DTXSID30209584	Isopropyl diphenyl phosphate	60763-39-5	YDICVVYPXSZSFA-UHFFFAOYSA-N	CC(C)OP(=O)(OC1=CC=CC=C1)OC1=CC=CC=C1	CC(C)OP(=O)(OC1=CC=CC=C1)OC1=CC=CC=C1	InChI=1S/C15H17O4P/c1-13(2)17-20(16,18-14-9-5-3-6-10-14)19-15-11-7-4-8-12-15/h3-13H,1-2H3	C15H17O4P	292.271
DTXSID80879892	BDE-72	446254-40-6	GBBNZKQTOOZGIS-UHFFFAOYSA-N	BrC1=CC(OC2=CC(Br)=CC(Br)=C2)=C(Br)C=C1	BrC1=CC(OC2=CC(Br)=CC(Br)=C2)=C(Br)C=C1	InChI=1S/C12H6Br4O/c13-7-1-2-11(16)12(6-7)17-10-4-8(14)3-9(15)5-10/h1-6H	C12H6Br4O	485.795
DTXSID80866227	7,8-Dibromo-1,2,3,4,11,11-hexachloro-1,4,4a,5,6,7,8,9,10,10a-decahydro-1,4-methanobenzocyclooctene	51936-55-1	XRFONNJUMOCNHA-UHFFFAOYSA-N	ClC1=C(Cl)C2(Cl)C3CCC(Br)C(Br)CCC3C1(Cl)C2(Cl)Cl	ClC1=C(Cl)C2(Cl)C3CCC(Br)C(Br)CCC3C1(Cl)C2(Cl)Cl	InChI=1/C13H12Br2Cl6/c14-7-3-1-5-6(2-4-8(7)15)12(19)10(17)9(16)11(5,18)13(12,20)21/h5-8H,1-4H2	C13H12Br2Cl6	540.75
DTXSID6050467	Antimony pentoxide	1314-60-9	LJCFOYOSGPHIOO-UHFFFAOYSA-N	O=[Sb](=O)O[Sb](=O)=O		InChI=1S/5O.2Sb	O5Sb2	323.515
DTXSID501016863	syn-Dechlorane Plus	135821-03-3	UGQQAJOWXNCOPY-MXYLTYEXSA-N	[H][C@]12CC[C@]3([H])[C@]([H])(CC[C@@]1([H])[C@@]1(Cl)C(Cl)=C(Cl)[C@]2(Cl)C1(Cl)Cl)[C@]1(Cl)C(Cl)=C(Cl)[C@@]3(Cl)C1(Cl)Cl	ClC1=C(Cl)C2(Cl)C3CCC4C(CCC3C1(Cl)C2(Cl)Cl)C1(Cl)C(Cl)=C(Cl)C4(Cl)C1(Cl)Cl,[H][C@]12CC[C@]3([H])[C@]([H])(CC[C@@]1([H])[C@@]1(Cl)C(Cl)=C(Cl)[C@]2(Cl)C1(Cl)Cl)[C@]1(Cl)C(Cl)=C(Cl)[C@@]3(Cl)C1(Cl)Cl	InChI=1/C18H12Cl12/c19-9-10(20)15(25)7-3-4-8-6(2-1-5(7)13(9,23)17(15,27)28)14(24)11(21)12(22)16(8,26)18(14,29)30/h5-8H,1-4H2/t5-,6+,7+,8-,13-,14+,15+,16-	C18H12Cl12	653.69
DTXSID90872793	2,2'-[(1-Methylethylidene)bis[(dibromo-4,1-phenylene)oxymethylene]]bis[oxirane]-4,4'-(1-methylethylidene)bis[2,6-dibromophenol] copolymer	68928-70-1
DTXSID20894307	Alkanes, C22-30-branched and linear, chloro	1401974-24-0
DTXSID20858924	Alkanes, C18-20, chloro	106232-85-3
DTXSID3029813	Chlorinated paraffin oils	85422-92-0
DTXSID9051957	Bis(isopropylphenyl) phenyl phosphate	28109-00-4
DTXSID70274039	Diphenyl 4-tolyl phosphate	78-31-9	OJUZRFGUKHQNJX-UHFFFAOYSA-N	CC1=CC=C(OP(=O)(OC2=CC=CC=C2)OC2=CC=CC=C2)C=C1	CC1=CC=C(OP(=O)(OC2=CC=CC=C2)OC2=CC=CC=C2)C=C1	InChI=1S/C19H17O4P/c1-16-12-14-19(15-13-16)23-24(20,21-17-8-4-2-5-9-17)22-18-10-6-3-7-11-18/h2-15H,1H3	C19H17O4P	340.315
DTXSID4063290	1,3,2-Dioxaphosphorinane, 2,2'-oxybis[5,5-dimethyl-, 2,2'-disulfide	4090-51-1	GAUFKBQSTGCCOC-UHFFFAOYSA-N	CC1(C)COP(=S)(OP2(=S)OCC(C)(C)CO2)OC1	CC1(C)COP(=S)(OP2(=S)OCC(C)(C)CO2)OC1	InChI=1S/C10H20O5P2S2/c1-9(2)5-11-16(18,12-6-9)15-17(19)13-7-10(3,4)8-14-17/h5-8H2,1-4H3	C10H20O5P2S2	346.33
DTXSID9050488	Calcium magnesium hydroxide oxide	58398-71-3	UEURCQNQTWXPEE-UHFFFAOYSA-L	[OH-].[OH-].[O--].[Mg++].[Ca++]		InChI=1S/Ca.Mg.2H2O.O/h;;2*1H2;/q2*+2;;;-2/p-2	CaH2MgO3	114.396
DTXSID901016653	Tris(chloroethyl) phosphate	29716-44-7
DTXSID80879958	BDE-159	446255-10-3	IDYFFNCFLRCOPZ-UHFFFAOYSA-N	BrC1=CC(OC2=CC(Br)=C(Br)C(Br)=C2Br)=CC(Br)=C1	BrC1=CC(OC2=CC(Br)=C(Br)C(Br)=C2Br)=CC(Br)=C1	InChI=1S/C12H4Br6O/c13-5-1-6(14)3-7(2-5)19-9-4-8(15)10(16)12(18)11(9)17/h1-4H	C12H4Br6O	643.587
DTXSID1033325	Chlorinated paraffins	63449-39-8
DTXSID70880073	Firemaster 550	860302-33-6
DTXSID80894308	Alkanes, C24-28, chloro	1402738-52-6
DTXSID00214802	Tris[2-(propan-2-yl)phenyl] phosphate	64532-95-2	LIPMRGQQBZJCTM-UHFFFAOYSA-N	CC(C)C1=CC=CC=C1OP(=O)(OC1=CC=CC=C1C(C)C)OC1=CC=CC=C1C(C)C	CC(C)C1=CC=CC=C1OP(=O)(OC1=CC=CC=C1C(C)C)OC1=CC=CC=C1C(C)C	InChI=1S/C27H33O4P/c1-19(2)22-13-7-10-16-25(22)29-32(28,30-26-17-11-8-14-23(26)20(3)4)31-27-18-12-9-15-24(27)21(5)6/h7-21H,1-6H3	C27H33O4P	452.531
DTXSID60879976	BDE-179	446255-25-0	COVXWWKOLMNRQE-UHFFFAOYSA-N	BrC1=CC(Br)=C(Br)C(OC2=C(Br)C=CC(Br)=C2Br)=C1Br	BrC1=CC(Br)=C(Br)C(OC2=C(Br)C=CC(Br)=C2Br)=C1Br	InChI=1S/C12H3Br7O/c13-4-1-2-5(14)11(8(4)17)20-12-9(18)6(15)3-7(16)10(12)19/h1-3H	C12H3Br7O	722.483
DTXSID401012987	Carbonic dichloride, polymer with 4,4'-(1-methylethylidene)bis[2,6-dibromophenol] and 4,4'-(1-methylethylidene)bis[phenol]	32844-27-2
DTXSID9029855	Phosphoric trichloride, polymer with 1,3-benzenediol, phenyl ester	125997-21-9
DTXSID10850114	Pentabromophenyl benzoate	57011-47-9	JQRIZLGZAPSJPN-UHFFFAOYSA-N	BrC1=C(Br)C(Br)=C(OC(=O)C2=CC=CC=C2)C(Br)=C1Br	BrC1=C(Br)C(Br)=C(OC(=O)C2=CC=CC=C2)C(Br)=C1Br	InChI=1S/C13H5Br5O2/c14-7-8(15)10(17)12(11(18)9(7)16)20-13(19)6-4-2-1-3-5-6/h1-5H	C13H5Br5O2	592.701
DTXSID7020899	Molybdenum trioxide	1313-27-5	JKQOBWVOAYFWKG-UHFFFAOYSA-N	O=[Mo](=O)=O		InChI=1S/Mo.3O	MoO3	143.95
DTXSID90872798	2,4-(or 2,6)-Dibromophenol, homopolymer	69882-11-7
DTXSID40879914	BDE-102	446254-66-6	JHFMCUVMAIQWRI-UHFFFAOYSA-N	BrC1=CC(Br)=C(OC2=C(Br)C=CC=C2Br)C=C1Br	BrC1=CC(Br)=C(OC2=C(Br)C=CC=C2Br)C=C1Br	InChI=1S/C12H5Br5O/c13-6-2-1-3-7(14)12(6)18-11-5-9(16)8(15)4-10(11)17/h1-5H	C12H5Br5O	564.691
DTXSID0029557	Bis(2-chloro-1-methylethyl) 2-chloropropyl phosphate	76025-08-6	NISNGFDWZYZNPT-UHFFFAOYSA-N	CC(Cl)COP(=O)(OC(C)CCl)OC(C)CCl	CC(Cl)COP(=O)(OC(C)CCl)OC(C)CCl	InChI=1/C9H18Cl3O4P/c1-7(12)6-14-17(13,15-8(2)4-10)16-9(3)5-11/h7-9H,4-6H2,1-3H3	C9H18Cl3O4P	327.56
DTXSID7024950	2,3-Dibromopropyl acrylate	19660-16-3	MUKJDVAYJDKPAG-UHFFFAOYSA-N	BrCC(Br)COC(=O)C=C	BrCC(Br)COC(=O)C=C	InChI=1/C6H8Br2O2/c1-2-6(9)10-4-5(8)3-7/h2,5H,1,3-4H2	C6H8Br2O2	271.936
DTXSID20879891	BDE-70	446254-39-3	GHQMTYWQVJZWAR-UHFFFAOYSA-N	BrC1=CC=C(Br)C(OC2=CC(Br)=C(Br)C=C2)=C1	BrC1=CC=C(Br)C(OC2=CC(Br)=C(Br)C=C2)=C1	InChI=1S/C12H6Br4O/c13-7-1-3-10(15)12(5-7)17-8-2-4-9(14)11(16)6-8/h1-6H	C12H6Br4O	485.795
DTXSID20452860	1,3,5-Triazine, 2,4,6-tris(2,3-dibromopropoxy)-	52434-59-0	DUPDOFDRVXJYOF-UHFFFAOYSA-N	BrCC(Br)COC1=NC(OCC(Br)CBr)=NC(OCC(Br)CBr)=N1	BrCC(Br)COC1=NC(OCC(Br)CBr)=NC(OCC(Br)CBr)=N1,BrCC(Br)COC1=NC(OCC(Br)CBr)=NC(OCC(Br)CBr)=N1	InChI=1S/C12H15Br6N3O3/c13-1-7(16)4-22-10-19-11(23-5-8(17)2-14)21-12(20-10)24-6-9(18)3-15/h7-9H,1-6H2	C12H15Br6N3O3	728.694
DTXSID40879893	BDE-73	446254-41-7	WQFLVWXBCRJAQN-UHFFFAOYSA-N	BrC1=CC(OC2=C(Br)C=CC=C2Br)=CC(Br)=C1	BrC1=CC(OC2=C(Br)C=CC=C2Br)=CC(Br)=C1	InChI=1S/C12H6Br4O/c13-7-4-8(14)6-9(5-7)17-12-10(15)2-1-3-11(12)16/h1-6H	C12H6Br4O	485.795
DTXSID50107134	Benzene, ethenyl-, ar-bromo derivs., polymers with propene, graft	171091-06-8
DTXSID80879938	BDE-133	446254-91-7	XTBFPFHQPGZZJX-UHFFFAOYSA-N	BrC1=CC(OC2=CC(Br)=CC(Br)=C2Br)=C(Br)C(Br)=C1	BrC1=CC(OC2=CC(Br)=CC(Br)=C2Br)=C(Br)C(Br)=C1	InChI=1S/C12H4Br6O/c13-5-1-7(15)11(17)9(3-5)19-10-4-6(14)2-8(16)12(10)18/h1-4H	C12H4Br6O	643.587
DTXSID001016682	dimethyl {[(4,6-dichloro-1,3,5-triazin-2-yl)oxy]methyl}phosphonate	1373346-90-7	MPFOQCIRCMIBGD-UHFFFAOYSA-N	COP(=O)(COC1=NC(Cl)=NC(Cl)=N1)OC	COP(=O)(COC1=NC(Cl)=NC(Cl)=N1)OC	InChI=1S/C6H8Cl2N3O4P/c1-13-16(12,14-2)3-15-6-10-4(7)9-5(8)11-6/h3H2,1-2H3	C6H8Cl2N3O4P	288.02
DTXSID3025465	Isodecyl diphenyl phosphate	29761-21-5		C*.CCCCCCCCCOP(=O)(OC1=CC=CC=C1)OC1=CC=CC=C1 |c:16,18,24,26,t:14,22,lp:11:2,13:2,14:2,21:2,m:1:10.9.8.7.6.5.4.3|
DTXSID50879900	BDE-83	446254-51-9	XAHYSNUYJLNDBX-UHFFFAOYSA-N	BrC1=CC(OC2=CC=CC(Br)=C2Br)=C(Br)C(Br)=C1	BrC1=CC(OC2=CC=CC(Br)=C2Br)=C(Br)C(Br)=C1	InChI=1S/C12H5Br5O/c13-6-4-8(15)12(17)10(5-6)18-9-3-1-2-7(14)11(9)16/h1-5H	C12H5Br5O	564.691
DTXSID40879974	BDE-177	446255-23-8	ZHUHLPXIJIBQBJ-UHFFFAOYSA-N	BrC1=CC=C(OC2=C(Br)C(Br)=CC(Br)=C2Br)C(Br)=C1Br	BrC1=CC=C(OC2=C(Br)C(Br)=CC(Br)=C2Br)C(Br)=C1Br	InChI=1S/C12H3Br7O/c13-4-1-2-7(11(19)8(4)16)20-12-9(17)5(14)3-6(15)10(12)18/h1-3H	C12H3Br7O	722.483
DTXSID90879868	BDE-42	446254-18-8	HQDQKPAHIDGGMH-UHFFFAOYSA-N	BrC1=CC=C(OC2=C(Br)C(Br)=CC=C2)C(Br)=C1	BrC1=CC=C(OC2=C(Br)C(Br)=CC=C2)C(Br)=C1	InChI=1S/C12H6Br4O/c13-7-4-5-10(9(15)6-7)17-11-3-1-2-8(14)12(11)16/h1-6H	C12H6Br4O	485.795
DTXSID901017087	pentabromocyclododecene	26657-83-0
DTXSID40872788	Melamine polyphosphate	218768-84-4
DTXSID40879878	BDE-56	446254-28-0	NFOIVCGFYJIYIB-UHFFFAOYSA-N	BrC1=C(Br)C=C(OC2=CC=CC(Br)=C2Br)C=C1	BrC1=C(Br)C=C(OC2=CC=CC(Br)=C2Br)C=C1	InChI=1S/C12H6Br4O/c13-8-5-4-7(6-10(8)15)17-11-3-1-2-9(14)12(11)16/h1-6H	C12H6Br4O	485.795
DTXSID00879935	BDE-129	446254-87-1	PRNCVYAUCSGSOE-UHFFFAOYSA-N	BrC1=CC(OC2=CC=CC(Br)=C2Br)=C(Br)C(Br)=C1Br	BrC1=CC(OC2=CC=CC(Br)=C2Br)=C(Br)C(Br)=C1Br	InChI=1S/C12H4Br6O/c13-5-2-1-3-7(9(5)15)19-8-4-6(14)10(16)12(18)11(8)17/h1-4H	C12H4Br6O	643.587
DTXSID8023927	p-Bromodiphenyl ether	101-55-3	JDUYPUMQALQRCN-UHFFFAOYSA-N	BrC1=CC=C(OC2=CC=CC=C2)C=C1	BrC1=CC=C(OC2=CC=CC=C2)C=C1	InChI=1S/C12H9BrO/c13-10-6-8-12(9-7-10)14-11-4-2-1-3-5-11/h1-9H	C12H9BrO	249.107
DTXSID80107622	Antiblaze 19	61840-22-0
DTXSID40890902	Calcium borate silicate	59794-15-9
DTXSID8025383	Hexabromocyclododecane	25637-99-4		Br*.Br*.Br*.Br*.Br*.BrC1CCCCCCCCCCC1 |lp:0:3,2:3,4:3,6:3,8:3,10:3,m:1:22.21.11.17.18.19.20,3:22.21.11.12.13.15.14.16.17.18.19.20,5:22.21.11.12.13.15.14.16.17.18.19.20,7:22.21.11.12.13.15.14.16.17.18.19.20,9:22.21.11.12.13.15.14.16.17.18.19.20|			C12H18Br6	641.7
DTXSID20960334	Tetrakis(hydroxymethyl)phosphanium 3-carboxy-3-hydroxypropanoate	39734-92-4	CBHZBAPOMQBESN-UHFFFAOYSA-M	OC[P+](CO)(CO)CO.OC(CC([O-])=O)C(O)=O	OCP(CO)(CO)CO	InChI=1/C4H6O5.C4H12O4P/c5-2(4(8)9)1-3(6)7;5-1-9(2-6,3-7)4-8/h2,5H,1H2,(H,6,7)(H,8,9);5-8H,1-4H2/q;+1/p-1	C8H17O9P	288.189
DTXSID40885873	1,2-Benzenedicarboxylic acid, 3,4,5,6-tetrabromo-, 1-butyl ester	42597-49-9	NMYAGQGGKVRMGI-UHFFFAOYSA-N	CCCCOC(=O)C1=C(Br)C(Br)=C(Br)C(Br)=C1C(O)=O	CCCCOC(=O)C1=C(Br)C(Br)=C(Br)C(Br)=C1C(O)=O	InChI=1S/C12H10Br4O4/c1-2-3-4-20-12(19)6-5(11(17)18)7(13)9(15)10(16)8(6)14/h2-4H2,1H3,(H,17,18)	C12H10Br4O4	537.824
DTXSID801016698	potassium bis(2,3-dibromopropyl) phosphate	66519-18-4	GVNZHGGTQVFWBO-UHFFFAOYSA-M	[K+].[O-]P(=O)(OCC(Br)CBr)OCC(Br)CBr	OP(=O)(OCC(Br)CBr)OCC(Br)CBr	InChI=1/C6H11Br4O4P.K/c7-1-5(9)3-13-15(11,12)14-4-6(10)2-8;/h5-6H,1-4H2,(H,11,12);/q;+1/p-1	C6H10Br4KO4P	535.83
DTXSID60872780	Sodium antimonate	15432-85-6	PTFQBEZVSZWZSG-UHFFFAOYSA-N	[Na+].O=[Sb-](=O)=O		InChI=1S/Na.3O.Sb/q+1;;;;-1	NaO3Sb	192.747
DTXSID50702527	1,2,4,5-Tetrabromo-3-(2,4,6-tribromophenoxy)benzene	116995-32-5	YGYDHFDPVGAMTL-UHFFFAOYSA-N	BrC1=CC(Br)=C(OC2=C(Br)C(Br)=CC(Br)=C2Br)C(Br)=C1	BrC1=CC(Br)=C(OC2=C(Br)C(Br)=CC(Br)=C2Br)C(Br)=C1	InChI=1S/C12H3Br7O/c13-4-1-7(16)11(8(17)2-4)20-12-9(18)5(14)3-6(15)10(12)19/h1-3H	C12H3Br7O	722.483
DTXSID10704805	2,3,3',4,4',5',6-Heptabromodiphenyl ether	446255-30-7	BNBFKFHSIPERIM-UHFFFAOYSA-N	BrC1=CC(OC2=C(Br)C(Br)=C(Br)C=C2Br)=CC(Br)=C1Br	BrC1=CC(OC2=C(Br)C(Br)=C(Br)C=C2Br)=CC(Br)=C1Br	InChI=1S/C12H3Br7O/c13-5-1-4(2-6(14)9(5)17)20-12-8(16)3-7(15)10(18)11(12)19/h1-3H	C12H3Br7O	722.483
DTXSID1044699	Diethyl hydrogen phosphate	598-02-7	UCQFCFPECQILOL-UHFFFAOYSA-N	CCOP(O)(=O)OCC	CCOP(O)(=O)OCC	InChI=1S/C4H11O4P/c1-3-7-9(5,6)8-4-2/h3-4H2,1-2H3,(H,5,6)	C4H11O4P	154.102
DTXSID0058300	Boron zinc oxide (B6Zn2O11)	12767-90-7	OSHGZAHTGPVONH-UHFFFAOYSA-N	[B+3].[B+3].[B+3].[B+3].[B+3].[B+3].[O--].[O--].[O--].[O--].[O--].[O--].[O--].[O--].[O--].[O-][Zn+].[O-][Zn+]		InChI=1S/6B.11O.2Zn/q6*+3;9*-2;2*-1;2*+1	B6O11Zn2	371.61
DTXSID70879967	BDE-168	53551-87-4	HWZAPXGFMVEGPW-UHFFFAOYSA-N	BrC1=CC(Br)=C(OC2=CC(Br)=C(Br)C(Br)=C2)C(Br)=C1	BrC1=CC(Br)=C(OC2=CC(Br)=C(Br)C(Br)=C2)C(Br)=C1	InChI=1S/C12H4Br6O/c13-5-1-9(16)12(10(17)2-5)19-6-3-7(14)11(18)8(15)4-6/h1-4H	C12H4Br6O	643.587
DTXSID601004590	2-Bromoethyl 5-bromopentyl 2-chloroethyl phosphate	84282-27-9	VHSQHKKCIWQEQD-UHFFFAOYSA-N	ClCCOP(=O)(OCCBr)OCCCCCBr	ClCCOP(=O)(OCCBr)OCCCCCBr	InChI=1/C9H18Br2ClO4P/c10-4-2-1-3-7-14-17(13,15-8-5-11)16-9-6-12/h1-9H2	C9H18Br2ClO4P	416.47
DTXSID70785695	1,3-Dibromo-5-(4-bromophenoxy)benzene	407606-57-9	UFFNOPDHJNQYKD-UHFFFAOYSA-N	BrC1=CC=C(OC2=CC(Br)=CC(Br)=C2)C=C1	BrC1=CC=C(OC2=CC(Br)=CC(Br)=C2)C=C1	InChI=1S/C12H7Br3O/c13-8-1-3-11(4-2-8)16-12-6-9(14)5-10(15)7-12/h1-7H	C12H7Br3O	406.899
DTXSID3067992	2-Butene, 1,1,2,3,4,4-hexabromo-	36678-45-2	VNDVTDGELDURCN-UHFFFAOYSA-N	BrC(Br)C(Br)=C(Br)C(Br)Br	BrC(Br)C(Br)=C(Br)C(Br)Br	InChI=1S/C4H2Br6/c5-1(3(7)8)2(6)4(9)10/h3-4H	C4H2Br6	529.484
DTXSID501000614	1~2~,1~3~,1~4~,1~5~,1~6~,2~3~,2~4~,3~2~,3~3~,3~4~,3~5~,3~6~-Dodecabromo-1~1~,2~1~:2~2~,3~1~-terphenyl	79596-31-9	KCRQNWFXVRCJKJ-UHFFFAOYSA-N	BrC1=C(Br)C(=C(C=C1)C1=C(Br)C(Br)=C(Br)C(Br)=C1Br)C1=C(Br)C(Br)=C(Br)C(Br)=C1Br	BrC1=C(Br)C(=C(C=C1)C1=C(Br)C(Br)=C(Br)C(Br)=C1Br)C1=C(Br)C(Br)=C(Br)C(Br)=C1Br	InChI=1S/C18H2Br12/c19-4-2-1-3(6-9(21)13(25)17(29)14(26)10(6)22)5(8(4)20)7-11(23)15(27)18(30)16(28)12(7)24/h1-2H	C18H2Br12	1177.06
DTXSID7024823	Chloro C22-26 alkanes	108171-27-3
DTXSID00879899	BDE-81	446254-50-8	ULFOIXCXIWHJDS-UHFFFAOYSA-N	BrC1=CC=C(OC2=CC(Br)=C(Br)C(Br)=C2)C=C1	BrC1=CC=C(OC2=CC(Br)=C(Br)C(Br)=C2)C=C1	InChI=1S/C12H6Br4O/c13-7-1-3-8(4-2-7)17-9-5-10(14)12(16)11(15)6-9/h1-6H	C12H6Br4O	485.795
DTXSID90889689	1,2-Benzenedicarboxylic acid, 3,4,5,6-tetrabromo-, sodium salt (1:2)	25357-79-3	UTNQAECQSKUEGD-UHFFFAOYSA-L	[Na+].[Na+].[O-]C(=O)C1=C(Br)C(Br)=C(Br)C(Br)=C1C([O-])=O	OC(=O)C1=C(Br)C(Br)=C(Br)C(Br)=C1C(O)=O	InChI=1S/C8H2Br4O4.2Na/c9-3-1(7(13)14)2(8(15)16)4(10)6(12)5(3)11;;/h(H,13,14)(H,15,16);;/q;2*+1/p-2	C8Br4Na2O4	525.68
DTXSID00108393	Polyphosphoric acids, compds. with pyrolyzed melamine	880647-20-1
DTXSID40879858	BDE-23	446254-16-6	XQHLKDAUZRXBGC-UHFFFAOYSA-N	BrC1=CC(OC2=CC=CC=C2)=C(Br)C(Br)=C1	BrC1=CC(OC2=CC=CC=C2)=C(Br)C(Br)=C1	InChI=1S/C12H7Br3O/c13-8-6-10(14)12(15)11(7-8)16-9-4-2-1-3-5-9/h1-7H	C12H7Br3O	406.899
DTXSID0066406	Dimethyl propylphosphonate	18755-43-6	YWDFOLFVOVCBIU-UHFFFAOYSA-N	CCCP(=O)(OC)OC	CCCP(=O)(OC)OC	InChI=1S/C5H13O3P/c1-4-5-9(6,7-2)8-3/h4-5H2,1-3H3	C5H13O3P	152.13
DTXSID30467127	(+)-beta-Hexabromocyclododecane	678970-16-6	DEIGXXQKDWULML-WUFAPUTGSA-N	Br[C@H]1CC[C@H](Br)[C@H](Br)CC[C@H](Br)[C@H](Br)CC[C@@H]1Br	Br[C@H]1CC[C@H](Br)[C@H](Br)CC[C@H](Br)[C@H](Br)CC[C@@H]1Br,BrC1CCC(Br)C(Br)CCC(Br)C(Br)CCC1Br	InChI=1S/C12H18Br6/c13-7-1-2-8(14)10(16)5-6-12(18)11(17)4-3-9(7)15/h7-12H,1-6H2/t7-,8-,9-,10+,11+,12-/m0/s1	C12H18Br6	641.7
DTXSID9061677	Antimony oxide (Sb2O4)	1332-81-6	AHBGXHAWSHTPOM-UHFFFAOYSA-N	O=[Sb]O[Sb](=O)=O		InChI=1S/4O.2Sb	O4Sb2	307.516
DTXSID301016700	Dechloran 604	71245-27-7	PHYHWKJTYWPNCS-PDPXOMPHSA-N	ClC1=C(Cl)[C@@]2(Cl)[C@H](C[C@]1(Cl)C2(Cl)Cl)C1=C(Br)C(Br)=C(Br)C(Br)=C1	ClC1=C(Cl)C2(Cl)C(CC1(Cl)C2(Cl)Cl)C1=CC(Br)=C(Br)C(Br)=C1Br,ClC1=C(Cl)[C@@]2(Cl)[C@H](C[C@]1(Cl)C2(Cl)Cl)C1=C(Br)C(Br)=C(Br)C(Br)=C1	InChI=1/C13H4Br4Cl6/c14-5-1-3(6(15)8(17)7(5)16)4-2-11(20)9(18)10(19)12(4,21)13(11,22)23/h1,4H,2H2/t4-,11-,12+/s2	C13H4Br4Cl6	692.49
DTXSID3032129	Tetrabromobisphenol A-bis(2,3-dibromopropyl ether)	21850-44-2	LXIZRZRTWSDLKK-UHFFFAOYSA-N	CC(C)(C1=CC(Br)=C(OCC(Br)CBr)C(Br)=C1)C1=CC(Br)=C(OCC(Br)CBr)C(Br)=C1	CC(C)(C1=CC(Br)=C(OCC(Br)CBr)C(Br)=C1)C1=CC(Br)=C(OCC(Br)CBr)C(Br)=C1	InChI=1/C21H20Br8O2/c1-21(2,11-3-15(26)19(16(27)4-11)30-9-13(24)7-22)12-5-17(28)20(18(29)6-12)31-10-14(25)8-23/h3-6,13-14H,7-10H2,1-2H3	C21H20Br8O2	943.621
DTXSID30879923	BDE-111	446254-74-6	PCHDCOXHJBWEPW-UHFFFAOYSA-N	BrC1=CC(OC2=CC(Br)=CC(Br)=C2Br)=CC(Br)=C1	BrC1=CC(OC2=CC(Br)=CC(Br)=C2Br)=CC(Br)=C1	InChI=1S/C12H5Br5O/c13-6-1-7(14)3-9(2-6)18-11-5-8(15)4-10(16)12(11)17/h1-5H	C12H5Br5O	564.691
DTXSID7021817	2,3-Dibromopropanol	96-13-9	QWVCIORZLNBIIC-UHFFFAOYSA-N	OCC(Br)CBr	OCC(Br)CBr	InChI=1/C3H6Br2O/c4-1-3(5)2-6/h3,6H,1-2H2	C3H6Br2O	217.888
DTXSID2024246	Pentabromodiphenyl ether	32534-81-9		[*]C1=C([*])C([*])=C(OC2=C([*])C([*])=C([*])C([*])=C2[*])C([*])=C1[*] |$_R1;;;_R1;;_R1;;;;;_R1;;_R1;;_R1;;_R1;;_R1;;_R1;;_R1$,c:1,8,16,21,t:5,12,lp:7:2,RG:_R1={Br* |$;_AP1$,lp:0:3|},LOG={_R1:;H;5}|			C12O	160.131
DTXSID00879975	BDE-178	446255-24-9	UWUVZUPEEORCRG-UHFFFAOYSA-N	BrC1=CC(Br)=C(Br)C(OC2=C(Br)C(Br)=CC(Br)=C2Br)=C1	BrC1=CC(Br)=C(Br)C(OC2=C(Br)C(Br)=CC(Br)=C2Br)=C1	InChI=1S/C12H3Br7O/c13-4-1-5(14)9(17)8(2-4)20-12-10(18)6(15)3-7(16)11(12)19/h1-3H	C12H3Br7O	722.483
DTXSID20893653	2,2-Bis(chloromethyl)-1,3-propanediyl tetrakis(1-chloro-2-propanyl) bis(phosphate)	1047637-37-5	NQJUKCVIIGJHRZ-UHFFFAOYSA-N	CC(CCl)OP(=O)(OCC(CCl)(CCl)COP(=O)(OC(C)CCl)OC(C)CCl)OC(C)CCl	CC(CCl)OP(=O)(OCC(CCl)(CCl)COP(=O)(OC(C)CCl)OC(C)CCl)OC(C)CCl	InChI=1/C17H32Cl6O8P2/c1-13(5-18)28-32(24,29-14(2)6-19)26-11-17(9-22,10-23)12-27-33(25,30-15(3)7-20)31-16(4)8-21/h13-16H,5-12H2,1-4H3	C17H32Cl6O8P2	639.08
DTXSID20879876	BDE-53	446254-25-7	SDVQGIMOFXMKHR-UHFFFAOYSA-N	BrC1=CC=C(Br)C(OC2=C(Br)C=CC=C2Br)=C1	BrC1=CC=C(Br)C(OC2=C(Br)C=CC=C2Br)=C1	InChI=1S/C12H6Br4O/c13-7-4-5-8(14)11(6-7)17-12-9(15)2-1-3-10(12)16/h1-6H	C12H6Br4O	485.795
DTXSID0021173	Firemaster FF-1	67774-32-7
DTXSID801016705	Bis(polyoxyethylene) methylphosphonate	363626-50-0
DTXSID1062623	Butyl diphenyl phosphate	2752-95-6	DIBUFQMCUZYQKN-UHFFFAOYSA-N	CCCCOP(=O)(OC1=CC=CC=C1)OC1=CC=CC=C1	CCCCOP(=O)(OC1=CC=CC=C1)OC1=CC=CC=C1	InChI=1S/C16H19O4P/c1-2-3-14-18-21(17,19-15-10-6-4-7-11-15)20-16-12-8-5-9-13-16/h4-13H,2-3,14H2,1H3	C16H19O4P	306.298
DTXSID80776039	(1R,2S,5S,6S,9S,10R)-1,2,5,6,9,10-Hexabromocyclododecane	169102-57-2	DEIGXXQKDWULML-IQMQYZSSSA-N	Br[C@H]1CC[C@H](Br)[C@H](Br)CC[C@@H](Br)[C@@H](Br)CC[C@@H]1Br	Br[C@H]1CC[C@H](Br)[C@H](Br)CC[C@@H](Br)[C@@H](Br)CC[C@@H]1Br,BrC1CCC(Br)C(Br)CCC(Br)C(Br)CCC1Br	InChI=1S/C12H18Br6/c13-7-1-2-8(14)10(16)5-6-12(18)11(17)4-3-9(7)15/h7-12H,1-6H2/t7-,8-,9-,10+,11-,12+/m0/s1	C12H18Br6	641.7
DTXSID40889331	myo-Inositol hexakisphosphate	83-86-3	IMQLKJBTEOYOSI-GPIVLXJGSA-N	OP(O)(=O)O[C@H]1[C@H](OP(O)(O)=O)[C@@H](OP(O)(O)=O)[C@H](OP(O)(O)=O)[C@H](OP(O)(O)=O)[C@@H]1OP(O)(O)=O	OP(O)(=O)OC1C(OP(O)(O)=O)C(OP(O)(O)=O)C(OP(O)(O)=O)C(OP(O)(O)=O)C1OP(O)(O)=O,OP(O)(=O)O[C@H]1[C@H](OP(O)(O)=O)[C@@H](OP(O)(O)=O)[C@H](OP(O)(O)=O)[C@H](OP(O)(O)=O)[C@@H]1OP(O)(O)=O	InChI=1S/C6H18O24P6/c7-31(8,9)25-1-2(26-32(10,11)12)4(28-34(16,17)18)6(30-36(22,23)24)5(29-35(19,20)21)3(1)27-33(13,14)15/h1-6H,(H2,7,8,9)(H2,10,11,12)(H2,13,14,15)(H2,16,17,18)(H2,19,20,21)(H2,22,23,24)/t1-,2-,3-,4+,5-,6-	C6H18O24P6	660.029
DTXSID1024627	1,2-Bis(2,4,6-tribromophenoxy)ethane	37853-59-1	YATIGPZCMOYEGE-UHFFFAOYSA-N	BrC1=CC(Br)=C(OCCOC2=C(Br)C=C(Br)C=C2Br)C(Br)=C1	BrC1=CC(Br)=C(OCCOC2=C(Br)C=C(Br)C=C2Br)C(Br)=C1	InChI=1S/C14H8Br6O2/c15-7-3-9(17)13(10(18)4-7)21-1-2-22-14-11(19)5-8(16)6-12(14)20/h3-6H,1-2H2	C14H8Br6O2	687.64
DTXSID4026264	Tris(2-ethylhexyl) phosphite	301-13-3	ILLOBGFGKYTZRO-UHFFFAOYSA-N	CCCCC(CC)COP(OCC(CC)CCCC)OCC(CC)CCCC	CCCCC(CC)COP(OCC(CC)CCCC)OCC(CC)CCCC	InChI=1/C24H51O3P/c1-7-13-16-22(10-4)19-25-28(26-20-23(11-5)17-14-8-2)27-21-24(12-6)18-15-9-3/h22-24H,7-21H2,1-6H3	C24H51O3P	418.643
DTXSID2052732	1,1'-Ethane-1,2-diylbis(pentabromobenzene)	84852-53-9	BZQKBFHEWDPQHD-UHFFFAOYSA-N	BrC1=C(Br)C(Br)=C(CCC2=C(Br)C(Br)=C(Br)C(Br)=C2Br)C(Br)=C1Br	BrC1=C(Br)C(Br)=C(CCC2=C(Br)C(Br)=C(Br)C(Br)=C2Br)C(Br)=C1Br	InChI=1S/C14H4Br10/c15-5-3(6(16)10(20)13(23)9(5)19)1-2-4-7(17)11(21)14(24)12(22)8(4)18/h1-2H2	C14H4Br10	971.226
DTXSID90879904	BDE-88	446254-55-3	OPZUHBCVIZNZFB-UHFFFAOYSA-N	BrC1=CC=CC=C1OC1=C(Br)C(Br)=C(Br)C=C1Br	BrC1=CC=CC=C1OC1=C(Br)C(Br)=C(Br)C=C1Br	InChI=1S/C12H5Br5O/c13-6-3-1-2-4-9(6)18-12-8(15)5-7(14)10(16)11(12)17/h1-5H	C12H5Br5O	564.691
DTXSID00199847	2,4-Dichlorodiphenyl ether	51892-26-3	KXIPYLZZJZMMPD-UHFFFAOYSA-N	ClC1=CC(Cl)=C(OC2=CC=CC=C2)C=C1	ClC1=CC(Cl)=C(OC2=CC=CC=C2)C=C1	InChI=1S/C12H8Cl2O/c13-9-6-7-12(11(14)8-9)15-10-4-2-1-3-5-10/h1-8H	C12H8Cl2O	239.1
DTXSID8052720	2,2-Bis[4-[bis(phenoxy)phosphoryloxy]phenyl]propane	5945-33-5	BQPNUOYXSVUVMY-UHFFFAOYSA-N	CC(C)(C1=CC=C(OP(=O)(OC2=CC=CC=C2)OC2=CC=CC=C2)C=C1)C1=CC=C(OP(=O)(OC2=CC=CC=C2)OC2=CC=CC=C2)C=C1	CC(C)(C1=CC=C(OP(=O)(OC2=CC=CC=C2)OC2=CC=CC=C2)C=C1)C1=CC=C(OP(=O)(OC2=CC=CC=C2)OC2=CC=CC=C2)C=C1	InChI=1S/C39H34O8P2/c1-39(2,31-23-27-37(28-24-31)46-48(40,42-33-15-7-3-8-16-33)43-34-17-9-4-10-18-34)32-25-29-38(30-26-32)47-49(41,44-35-19-11-5-12-20-35)45-36-21-13-6-14-22-36/h3-30H,1-2H3	C39H34O8P2	692.641
DTXSID50988682	1-Bromo-4-chlorodecane	NOCAS_988682	DHBXYDXZDGEFBV-UHFFFAOYSA-N	CCCCCCC(Cl)CCCBr	CCCCCCC(Cl)CCCBr	InChI=1/C10H20BrCl/c1-2-3-4-5-7-10(12)8-6-9-11/h10H,2-9H2,1H3	C10H20BrCl	255.62
DTXSID50879980	BDE-189	259087-35-9	CQVLRTUESBMMJW-UHFFFAOYSA-N	BrC1=CC(OC2=CC(Br)=C(Br)C(Br)=C2Br)=CC(Br)=C1Br	BrC1=CC(OC2=CC(Br)=C(Br)C(Br)=C2Br)=CC(Br)=C1Br	InChI=1S/C12H3Br7O/c13-5-1-4(2-6(14)9(5)16)20-8-3-7(15)10(17)12(19)11(8)18/h1-3H	C12H3Br7O	722.483
DTXSID80152374	2,2',3,4,4',5,6,6'-Octabromobiphenyl	119264-61-8	PFBOUFHNJQYEJX-UHFFFAOYSA-N	BrC1=CC(Br)=C(C(Br)=C1)C1=C(Br)C(Br)=C(Br)C(Br)=C1Br	BrC1=CC(Br)=C(C(Br)=C1)C1=C(Br)C(Br)=C(Br)C(Br)=C1Br	InChI=1S/C12H2Br8/c13-3-1-4(14)6(5(15)2-3)7-8(16)10(18)12(20)11(19)9(7)17/h1-2H	C12H2Br8	785.38
DTXSID20872802	Aluminum hypophosphite	7784-22-7	ZJKCITHLCNCAHA-UHFFFAOYSA-K	[Al+3].[H]P([H])([O-])=O.[H]P([H])([O-])=O.[H]P([H])([O-])=O		InChI=1S/Al.3H3O2P/c;3*1-3-2/h;3*3H2,(H,1,2)/q+3;;;/p-3	AlH6O6P3	221.945
DTXSID7034387	Boron oxide (B2O3)	1303-86-2	PODRREOVGPHRIK-UHFFFAOYSA-N	[B+3].[B+3].[O--].[O--].[O--]		InChI=1S/2B.3O/q2*+3;3*-2	B2O3	69.62
DTXSID90724142	Tris(2,4,6-tribromophenyl) phosphate	7046-64-2	RMXMITCPGRBNAS-UHFFFAOYSA-N	BrC1=CC(Br)=C(OP(=O)(OC2=C(Br)C=C(Br)C=C2Br)OC2=C(Br)C=C(Br)C=C2Br)C(Br)=C1	BrC1=CC(Br)=C(OP(=O)(OC2=C(Br)C=C(Br)C=C2Br)OC2=C(Br)C=C(Br)C=C2Br)C(Br)=C1	InChI=1S/C18H6Br9O4P/c19-7-1-10(22)16(11(23)2-7)29-32(28,30-17-12(24)3-8(20)4-13(17)25)31-18-14(26)5-9(21)6-15(18)27/h1-6H	C18H6Br9O4P	1036.35
DTXSID4052689	2,2',4,4',6-Pentabromodiphenyl ether	189084-64-8	NSKIRYMHNFTRLR-UHFFFAOYSA-N	BrC1=CC=C(OC2=C(Br)C=C(Br)C=C2Br)C(Br)=C1	BrC1=CC=C(OC2=C(Br)C=C(Br)C=C2Br)C(Br)=C1	InChI=1S/C12H5Br5O/c13-6-1-2-11(8(15)3-6)18-12-9(16)4-7(14)5-10(12)17/h1-5H	C12H5Br5O	564.691
DTXSID00873771	(+/-)-α-Hexabromocyclododecane	134237-50-6	DEIGXXQKDWULML-PQTSNVLCSA-N	Br[C@H]1CC[C@@H](Br)[C@H](Br)CC[C@H](Br)[C@H](Br)CC[C@H]1Br	Br[C@H]1CC[C@@H](Br)[C@H](Br)CC[C@H](Br)[C@H](Br)CC[C@H]1Br,BrC1CCC(Br)C(Br)CCC(Br)C(Br)CCC1Br	InChI=1/C12H18Br6/c13-7-1-2-8(14)10(16)5-6-12(18)11(17)4-3-9(7)15/h7-12H,1-6H2/t7-,8-,9+,10+,11-,12-/s2	C12H18Br6	641.7
DTXSID201016864	anti-Dechlorane Plus	135821-74-8	UGQQAJOWXNCOPY-VBCJEVMVSA-N	[H][C@]12CC[C@@]3([H])[C@@]([H])(CC[C@@]1([H])[C@@]1(Cl)C(Cl)=C(Cl)[C@]2(Cl)C1(Cl)Cl)[C@@]1(Cl)C(Cl)=C(Cl)[C@]3(Cl)C1(Cl)Cl	[H][C@]12CC[C@@]3([H])[C@@]([H])(CC[C@@]1([H])[C@@]1(Cl)C(Cl)=C(Cl)[C@]2(Cl)C1(Cl)Cl)[C@@]1(Cl)C(Cl)=C(Cl)[C@]3(Cl)C1(Cl)Cl,ClC1=C(Cl)C2(Cl)C3CCC4C(CCC3C1(Cl)C2(Cl)Cl)C1(Cl)C(Cl)=C(Cl)C4(Cl)C1(Cl)Cl	InChI=1/C18H12Cl12/c19-9-10(20)15(25)7-3-4-8-6(2-1-5(7)13(9,23)17(15,27)28)14(24)11(21)12(22)16(8,26)18(14,29)30/h5-8H,1-4H2/t5-,6-,7+,8+,13-,14-,15+,16+	C18H12Cl12	653.69
DTXSID40616285	1,3-Dibromo-2-(2,4-dibromophenoxy)benzene	189084-57-9	WKBBBTLDLKYGBI-UHFFFAOYSA-N	BrC1=CC(Br)=C(OC2=C(Br)C=CC=C2Br)C=C1	BrC1=CC(Br)=C(OC2=C(Br)C=CC=C2Br)C=C1	InChI=1S/C12H6Br4O/c13-7-4-5-11(10(16)6-7)17-12-8(14)2-1-3-9(12)15/h1-6H	C12H6Br4O	485.795
DTXSID0058691	Tris(tribromoneopentyl)phosphate	19186-97-1	BHYQWBKCXBXPKM-UHFFFAOYSA-N	BrCC(CBr)(CBr)COP(=O)(OCC(CBr)(CBr)CBr)OCC(CBr)(CBr)CBr	BrCC(CBr)(CBr)COP(=O)(OCC(CBr)(CBr)CBr)OCC(CBr)(CBr)CBr	InChI=1S/C15H24Br9O4P/c16-1-13(2-17,3-18)10-26-29(25,27-11-14(4-19,5-20)6-21)28-12-15(7-22,8-23)9-24/h1-12H2	C15H24Br9O4P	1018.46
DTXSID5029689	Ammonium phosphate	7722-76-1	LFVGISIMTYGQHF-UHFFFAOYSA-N	[NH4+].OP(O)([O-])=O		InChI=1S/H3N.H3O4P/c;1-5(2,3)4/h1H3;(H3,1,2,3,4)	H6NO4P	115.025
DTXSID6029705	Diammonium hydrogen phosphate	7783-28-0	MNNHAPBLZZVQHP-UHFFFAOYSA-N	[NH4+].[NH4+].OP([O-])([O-])=O		InChI=1S/2H3N.H3O4P/c;;1-5(2,3)4/h2*1H3;(H3,1,2,3,4)	H9N2O4P	132.056
DTXSID30958080	Ethenyl dihydrogen phosphate	36885-49-1	BNKAXGCRDYRABM-UHFFFAOYSA-N	OP(O)(=O)OC=C	OP(O)(=O)OC=C	InChI=1S/C2H5O4P/c1-2-6-7(3,4)5/h2H,1H2,(H2,3,4,5)	C2H5O4P	124.032
DTXSID2024951	2,3-Dibromopropylmethacrylate	3066-70-4	SOFCUHQPMOGPQX-UHFFFAOYSA-N	CC(=C)C(=O)OCC(Br)CBr	CC(=C)C(=O)OCC(Br)CBr	InChI=1/C7H10Br2O2/c1-5(2)7(10)11-4-6(9)3-8/h6H,1,3-4H2,2H3	C7H10Br2O2	285.963
DTXSID10879885	BDE-63	446254-34-8	HNICYXFGCWPYGC-UHFFFAOYSA-N	BrC1=CC=C(OC2=CC(Br)=CC(Br)=C2Br)C=C1	BrC1=CC=C(OC2=CC(Br)=CC(Br)=C2Br)C=C1	InChI=1S/C12H6Br4O/c13-7-1-3-9(4-2-7)17-11-6-8(14)5-10(15)12(11)16/h1-6H	C12H6Br4O	485.795
DTXSID90577711	1-Bromo-3-(4-bromophenoxy)benzene	83694-71-7	BGPOVBPKODCMMN-UHFFFAOYSA-N	BrC1=CC=C(OC2=CC(Br)=CC=C2)C=C1	BrC1=CC=C(OC2=CC(Br)=CC=C2)C=C1	InChI=1S/C12H8Br2O/c13-9-4-6-11(7-5-9)15-12-3-1-2-10(14)8-12/h1-8H	C12H8Br2O	328.003
DTXSID80879953	BDE-150	446255-05-6	SQNOZOVDXXSLSG-UHFFFAOYSA-N	BrC1=CC(Br)=C(OC2=C(Br)C=CC(Br)=C2Br)C(Br)=C1	BrC1=CC(Br)=C(OC2=C(Br)C=CC(Br)=C2Br)C(Br)=C1	InChI=1S/C12H4Br6O/c13-5-3-8(16)11(9(17)4-5)19-12-7(15)2-1-6(14)10(12)18/h1-4H	C12H4Br6O	643.587
DTXSID30872671	Alkanes, C12-​14, chloro	85536-22-7
DTXSID9047548	1,1'-Oxybis(2,3,4,5-tetrabromobenzene)	85446-17-9	ORYGKUIDIMIRNN-UHFFFAOYSA-N	BrC1=C(Br)C(Br)=C(Br)C(OC2=CC(Br)=C(Br)C(Br)=C2Br)=C1	BrC1=C(Br)C(Br)=C(Br)C(OC2=CC(Br)=C(Br)C(Br)=C2Br)=C1	InChI=1S/C12H2Br8O/c13-3-1-5(9(17)11(19)7(3)15)21-6-2-4(14)8(16)12(20)10(6)18/h1-2H	C12H2Br8O	801.379
DTXSID101000529	Tetrakis(hydroxymethyl)phosphanium naphthalene-2-sulfonate	79481-22-4	YOHQZPAZGCMWSN-UHFFFAOYSA-M	OC[P+](CO)(CO)CO.[O-]S(=O)(=O)C1=CC2=CC=CC=C2C=C1	OCP(CO)(CO)CO	InChI=1S/C10H8O3S.C4H12O4P/c11-14(12,13)10-6-5-8-3-1-2-4-9(8)7-10;5-1-9(2-6,3-7)4-8/h1-7H,(H,11,12,13);5-8H,1-4H2/q;+1/p-1	C14H19O7PS	362.33
DTXSID2029242	Diethyl (N,N-bis(2-hydroxyethyl)amino)methanephosphonate	2781-11-5	CCJKFLLIJCGHMO-UHFFFAOYSA-N	CCOP(=O)(CN(CCO)CCO)OCC	CCOP(=O)(CN(CCO)CCO)OCC	InChI=1S/C9H22NO5P/c1-3-14-16(13,15-4-2)9-10(5-7-11)6-8-12/h11-12H,3-9H2,1-2H3	C9H22NO5P	255.251
DTXSID10879961	BDE-162	446255-13-6	UKPNCLHMNJCGCJ-UHFFFAOYSA-N	BrC1=CC(Br)=C(Br)C(OC2=CC(Br)=C(Br)C(Br)=C2)=C1	BrC1=CC(Br)=C(Br)C(OC2=CC(Br)=C(Br)C(Br)=C2)=C1	InChI=1S/C12H4Br6O/c13-5-1-7(14)12(18)10(2-5)19-6-3-8(15)11(17)9(16)4-6/h1-4H	C12H4Br6O	643.587
DTXSID00196255	2,2',3,4,4',5,6,6'-Octabromodiphenyl ether	446255-54-5	YZABCBOJTHQTSX-UHFFFAOYSA-N	BrC1=CC(Br)=C(OC2=C(Br)C(Br)=C(Br)C(Br)=C2Br)C(Br)=C1	BrC1=CC(Br)=C(OC2=C(Br)C(Br)=C(Br)C(Br)=C2Br)C(Br)=C1	InChI=1S/C12H2Br8O/c13-3-1-4(14)11(5(15)2-3)21-12-9(19)7(17)6(16)8(18)10(12)20/h1-2H	C12H2Br8O	801.379
DTXSID8074287	Octyl diphenyl phosphate	115-88-8	YAFOVCNAQTZDQB-UHFFFAOYSA-N	CCCCCCCCOP(=O)(OC1=CC=CC=C1)OC1=CC=CC=C1	CCCCCCCCOP(=O)(OC1=CC=CC=C1)OC1=CC=CC=C1	InChI=1S/C20H27O4P/c1-2-3-4-5-6-13-18-22-25(21,23-19-14-9-7-10-15-19)24-20-16-11-8-12-17-20/h7-12,14-17H,2-6,13,18H2,1H3	C20H27O4P	362.406
DTXSID70879902	BDE-86	446254-53-1	YMVWYUWOUOQCQP-UHFFFAOYSA-N	BrC1=CC=CC=C1OC1=C(Br)C(Br)=C(Br)C(Br)=C1	BrC1=CC=CC=C1OC1=C(Br)C(Br)=C(Br)C(Br)=C1	InChI=1S/C12H5Br5O/c13-6-3-1-2-4-8(6)18-9-5-7(14)10(15)12(17)11(9)16/h1-5H	C12H5Br5O	564.691
DTXSID5021330	Tetramethylolphosphonium chloride	124-64-1	AKXUUJCMWZFYMV-UHFFFAOYSA-M	[Cl-].OC[P+](CO)(CO)CO	OCP(CO)(CO)CO	InChI=1S/C4H12O4P.ClH/c5-1-9(2-6,3-7)4-8;/h5-8H,1-4H2;1H/q+1;/p-1	C4H12ClO4P	190.56
DTXSID5021174	Polybrominated biphenyls (PBB)	59536-65-1		[*]C1=C([*])C([*])=C(C([*])=C1[*])C1=C([*])C([*])=C([*])C([*])=C1[*] |$_R1;;;_R1;;_R1;;;_R1;;_R1;;;_R1;;_R1;;_R1;;_R1;;_R1$,c:1,5,8,12,20,t:16,RG:_R1={Br* |$;_AP1$,lp:0:3|},LOG={_R1:;H;>0}|
DTXSID9064639	Tribromophenoxyethyl acrylate	7347-19-5	AMBJXYFIMKHOQE-UHFFFAOYSA-N	BrC1=CC(Br)=C(OCCOC(=O)C=C)C(Br)=C1	BrC1=CC(Br)=C(OCCOC(=O)C=C)C(Br)=C1	InChI=1S/C11H9Br3O3/c1-2-10(15)16-3-4-17-11-8(13)5-7(12)6-9(11)14/h2,5-6H,1,3-4H2	C11H9Br3O3	428.902
DTXSID4026266	Tris(2-hydroxyethyl) isocyanurate	839-90-7	BPXVHIRIPLPOPT-UHFFFAOYSA-N	OCCN1C(=O)N(CCO)C(=O)N(CCO)C1=O	OCCN1C(=O)N(CCO)C(=O)N(CCO)C1=O	InChI=1S/C9H15N3O6/c13-4-1-10-7(16)11(2-5-14)9(18)12(3-6-15)8(10)17/h13-15H,1-6H2	C9H15N3O6	261.234
DTXSID601018498	Alkanes, C22-30, chloro	288260-42-4
DTXSID401010943	Octadecane, chloro derivs.	2097144-48-2
DTXSID1020194	Boric acid (H3BO3)	10043-35-3	KGBXLFKZBHKPEV-UHFFFAOYSA-N	OB(O)O		InChI=1S/BH3O3/c2-1(3)4/h2-4H	BH3O3	61.83
DTXSID7029740	Dipotassium hexafluorotitanate	16919-27-0	RXCBCUJUGULOGC-UHFFFAOYSA-H	[K+].[K+].F[Ti--](F)(F)(F)(F)F		InChI=1S/6FH.2K.Ti/h6*1H;;;/q;;;;;;2*+1;+4/p-6	F6K2Ti	240.054
DTXSID4072154	1,3,5-Triazine-2,4,6-triamine, compd. with 3,9-dihydroxy-2,4,8,10-tetraoxa-3,9-diphosphaspiro[5.5]undecane 3,9-dioxide (2:1)	70776-17-9	JCDRSDQQFZMLMN-UHFFFAOYSA-N	NC1=NC(N)=NC(N)=N1.NC1=NC(N)=NC(N)=N1.OP1(=O)OCC2(CO1)COP(O)(=O)OC2		InChI=1S/C5H10O8P2.2C3H6N6/c6-14(7)10-1-5(2-11-14)3-12-15(8,9)13-4-5;2*4-1-7-2(5)9-3(6)8-1/h1-4H2,(H,6,7)(H,8,9);2*(H6,4,5,6,7,8,9)	C11H22N12O8P2	512.321
DTXSID20545726	2,3,4,5-Tetrabromophenol	36313-15-2	KXZRECGEDVBJPM-UHFFFAOYSA-N	OC1=CC(Br)=C(Br)C(Br)=C1Br	OC1=CC(Br)=C(Br)C(Br)=C1Br	InChI=1S/C6H2Br4O/c7-2-1-3(11)5(9)6(10)4(2)8/h1,11H	C6H2Br4O	409.697
DTXSID4052716	Tri(aziridin-1-yl)phosphine oxide	545-55-1	FYAMXEPQQLNQDM-UHFFFAOYSA-N	O=P(N1CC1)(N1CC1)N1CC1	O=P(N1CC1)(N1CC1)N1CC1	InChI=1S/C6H12N3OP/c10-11(7-1-2-7,8-3-4-8)9-5-6-9/h1-6H2	C6H12N3OP	173.156
DTXSID1034391	Disodium octaborate tetrahydrate	12280-03-4	RDMZIKMKSGCBKK-UHFFFAOYSA-N	O.O.O.O.[Na+].[Na+].[O-]B1OB([O-])OB2OB(OB=O)OB(OB=O)OB(O1)O2		InChI=1S/B8O13.2Na.4H2O/c9-1-13-5-18-6(14-2-10)20-8-17-4(12)15-3(11)16-7(19-5)21-8;;;;;;/h;;;4*1H2/q-2;2*+1;;;;	B8H8Na2O17	412.51
DTXSID60970533	(Propane-2,2-diyl)bis(2,6-dibromo-4,1-phenylene) diprop-2-enoate	55205-38-4	VSVDQVJQWXJJSS-UHFFFAOYSA-N	CC(C)(C1=CC(Br)=C(OC(=O)C=C)C(Br)=C1)C1=CC(Br)=C(OC(=O)C=C)C(Br)=C1	CC(C)(C1=CC(Br)=C(OC(=O)C=C)C(Br)=C1)C1=CC(Br)=C(OC(=O)C=C)C(Br)=C1	InChI=1S/C21H16Br4O4/c1-5-17(26)28-19-13(22)7-11(8-14(19)23)21(3,4)12-9-15(24)20(16(25)10-12)29-18(27)6-2/h5-10H,1-2H2,3-4H3	C21H16Br4O4	651.971
DTXSID00872668	Alkanes, C16-​35, chloro	85049-26-9
DTXSID4049662	Magnesium hydroxide	1309-42-8	VTHJTEIRLNZDEV-UHFFFAOYSA-L	[OH-].[OH-].[Mg++]		InChI=1S/Mg.2H2O/h;2*1H2/q+2;;/p-2	H2MgO2	58.319
DTXSID401016703	Hexabromohexane	125512-87-0
DTXSID30219340	2,2',3,3',4,4',5,5',6-Nonabromo-1,1'-biphenyl	69278-62-2	QLERKXRXNDBTDM-UHFFFAOYSA-N	BrC1=CC(=C(Br)C(Br)=C1Br)C1=C(Br)C(Br)=C(Br)C(Br)=C1Br	BrC1=CC(=C(Br)C(Br)=C1Br)C1=C(Br)C(Br)=C(Br)C(Br)=C1Br	InChI=1S/C12HBr9/c13-3-1-2(5(14)9(18)6(3)15)4-7(16)10(19)12(21)11(20)8(4)17/h1H	C12HBr9	864.276
DTXSID1026083	1,1,2,2-Tetrabromoethane	79-27-6	QXSZNDIIPUOQMB-UHFFFAOYSA-N	BrC(Br)C(Br)Br	BrC(Br)C(Br)Br	InChI=1S/C2H2Br4/c3-1(4)2(5)6/h1-2H	C2H2Br4	345.654
DTXSID70180181	Cyclodecane, hexabromo	25495-98-1	GRPTWLLWXYXFLX-UHFFFAOYSA-N	BrC1(Br)CCCCCCCC(Br)(Br)C1(Br)Br	BrC1(Br)CCCCCCCC(Br)(Br)C1(Br)Br	InChI=1S/C10H14Br6/c11-8(12)6-4-2-1-3-5-7-9(13,14)10(8,15)16/h1-7H2	C10H14Br6	613.646
DTXSID5021411	Tris(2-chloroethyl) phosphate	115-96-8	HQUQLFOMPYWACS-UHFFFAOYSA-N	ClCCOP(=O)(OCCCl)OCCCl	ClCCOP(=O)(OCCCl)OCCCl	InChI=1S/C6H12Cl3O4P/c7-1-4-11-14(10,12-5-2-8)13-6-3-9/h1-6H2	C6H12Cl3O4P	285.48
DTXSID001016751	Octabromobiphenyl	27858-07-7					C12H2Br8	785.38
DTXSID50218113	1,1'-Biphenyl, 2,2',4,5,5'-pentabromo-	67888-96-4	OELBLPCWLAWABI-UHFFFAOYSA-N	BrC1=CC(=C(Br)C=C1)C1=CC(Br)=C(Br)C=C1Br	BrC1=CC(=C(Br)C=C1)C1=CC(Br)=C(Br)C=C1Br	InChI=1S/C12H5Br5/c13-6-1-2-9(14)7(3-6)8-4-11(16)12(17)5-10(8)15/h1-5H	C12H5Br5	548.692
DTXSID1034347	Barium metaborate	13701-59-2	QBLDFAIABQKINO-UHFFFAOYSA-N	[Ba++].[O-]B=O.[O-]B=O		InChI=1S/2BO2.Ba/c2*2-1-3;/q2*-1;+2	B2BaO4	222.94
DTXSID801017115	Cellulose, 6-carboxy, ion (neg.), tetrakis(hydroxymethyl)phosphonium	73082-49-2
DTXSID901016691	1,1'-{[(2Z)-2,3-dibromobut-2-ene-1,4-diyl]bis(oxy)}bis(2,4,6-tribromobenzene)	31977-87-4	OOCAXALPLINHDQ-YPKPFQOOSA-N	Br\C(COC1=C(Br)C=C(Br)C=C1Br)=C(/Br)COC1=C(Br)C=C(Br)C=C1Br	"Br\\C(COC1=C(Br)C=C(Br)C=C1Br)=C(/Br)COC1=C(Br)C=C(Br)C=C1Br",BrC(COC1=C(Br)C=C(Br)C=C1Br)=C(Br)COC1=C(Br)C=C(Br)C=C1Br	InChI=1S/C16H8Br8O2/c17-7-1-9(19)15(10(20)2-7)25-5-13(23)14(24)6-26-16-11(21)3-8(18)4-12(16)22/h1-4H,5-6H2/b14-13-	C16H8Br8O2	871.47
DTXSID401016672	(-)-alpha-Hexabromocyclododecane	678970-15-5	DEIGXXQKDWULML-PQTSNVLCSA-N	Br[C@H]1CC[C@@H](Br)[C@H](Br)CC[C@H](Br)[C@H](Br)CC[C@H]1Br	BrC1CCC(Br)C(Br)CCC(Br)C(Br)CCC1Br,Br[C@H]1CC[C@@H](Br)[C@H](Br)CC[C@H](Br)[C@H](Br)CC[C@H]1Br	InChI=1S/C12H18Br6/c13-7-1-2-8(14)10(16)5-6-12(18)11(17)4-3-9(7)15/h7-12H,1-6H2/t7-,8-,9+,10+,11-,12-/m1/s1	C12H18Br6	641.7
DTXSID4051661	Boehmite	1318-23-6	VXAUWWUXCIMFIM-UHFFFAOYSA-M	[OH-].[O--].[Al+3]		InChI=1S/Al.H2O.O/h;1H2;/q+3;;-2/p-1	AlHO2	59.988
DTXSID90879863	BDE-35	147217-80-9	CDVYKQPKJYPWRO-UHFFFAOYSA-N	BrC1=CC(OC2=CC=C(Br)C(Br)=C2)=CC=C1	BrC1=CC(OC2=CC=C(Br)C(Br)=C2)=CC=C1	InChI=1S/C12H7Br3O/c13-8-2-1-3-9(6-8)16-10-4-5-11(14)12(15)7-10/h1-7H	C12H7Br3O	406.899
DTXSID401017113	Huntite	19569-21-2	CXUJOBCFZQGUGO-UHFFFAOYSA-F	[Mg++].[Mg++].[Mg++].[Ca++].[O-]C([O-])=O.[O-]C([O-])=O.[O-]C([O-])=O.[O-]C([O-])=O	OC(O)=O	InChI=1S/4CH2O3.Ca.3Mg/c4*2-1(3)4;;;;/h4*(H2,2,3,4);;;;/q;;;;4*+2/p-8	C4CaMg3O12	353.025
DTXSID9025326	Ferrocene	102-54-5		[Fe++].c1cccc1.c1cccc1			C10H10Fe	186.034
DTXSID6026084	4,5,6,7-Tetrabromo-1,3-Isobenzofurandione	632-79-1	QHWKHLYUUZGSCW-UHFFFAOYSA-N	BrC1=C2C(=O)OC(=O)C2=C(Br)C(Br)=C1Br	BrC1=C2C(=O)OC(=O)C2=C(Br)C(Br)=C1Br	InChI=1S/C8Br4O3/c9-3-1-2(8(14)15-7(1)13)4(10)6(12)5(3)11	C8Br4O3	463.701
DTXSID3074789	2,2′,3,3′,4,4′,5,6′-octabromodiphenyl ether	446255-39-6	IEWFKOVTVJNWFF-UHFFFAOYSA-N	BrC1=CC(Br)=C(OC2=CC(Br)=C(Br)C(Br)=C2Br)C(Br)=C1Br	BrC1=CC(Br)=C(OC2=CC(Br)=C(Br)C(Br)=C2Br)C(Br)=C1Br	InChI=1S/C12H2Br8O/c13-3-1-5(15)12(11(20)8(3)17)21-6-2-4(14)7(16)10(19)9(6)18/h1-2H	C12H2Br8O	801.379
DTXSID30785353	1,2,3,5-Tetrabromo-4-(2,4-dibromophenoxy)benzene	446254-96-2	YESDYWNWEVPOLZ-UHFFFAOYSA-N	BrC1=CC(Br)=C(OC2=C(Br)C(Br)=C(Br)C=C2Br)C=C1	BrC1=CC(Br)=C(OC2=C(Br)C(Br)=C(Br)C=C2Br)C=C1	InChI=1S/C12H4Br6O/c13-5-1-2-9(6(14)3-5)19-12-8(16)4-7(15)10(17)11(12)18/h1-4H	C12H4Br6O	643.587
DTXSID1025300	2-Ethylhexyl diphenyl phosphate	1241-94-7	CGSLYBDCEGBZCG-UHFFFAOYSA-N	CCCCC(CC)COP(=O)(OC1=CC=CC=C1)OC1=CC=CC=C1	CCCCC(CC)COP(=O)(OC1=CC=CC=C1)OC1=CC=CC=C1	InChI=1/C20H27O4P/c1-3-5-12-18(4-2)17-22-25(21,23-19-13-8-6-9-14-19)24-20-15-10-7-11-16-20/h6-11,13-16,18H,3-5,12,17H2,1-2H3	C20H27O4P	362.406
DTXSID5023875	Ammonium sulfamate	7773-06-0	GEHMBYLTCISYNY-UHFFFAOYSA-N	[NH4+].NS([O-])(=O)=O		InChI=1S/H3NO3S.H3N/c1-5(2,3)4;/h(H3,1,2,3,4);1H3	H6N2O3S	114.12
DTXSID90209646	Benzene, pentabromo-	608-90-2	LLVVSBBXENOOQY-UHFFFAOYSA-N	BrC1=CC(Br)=C(Br)C(Br)=C1Br	BrC1=CC(Br)=C(Br)C(Br)=C1Br	InChI=1S/C6HBr5/c7-2-1-3(8)5(10)6(11)4(2)9/h1H	C6HBr5	472.594
DTXSID2094005	Aluminum phosphate (Al(H2PO4)3)	13530-50-2	RGPUVZXXZFNFBF-UHFFFAOYSA-K	[Al+3].OP(O)([O-])=O.OP(O)([O-])=O.OP(O)([O-])=O		InChI=1S/Al.3H3O4P/c;3*1-5(2,3)4/h;3*(H3,1,2,3,4)/q+3;;;/p-3	AlH6O12P3	317.939
DTXSID001016668	3,3',5,5'-Tetrabromobisphenol A bispropionate	37419-42-4	CHPHPONWLVLQCX-UHFFFAOYSA-N	CCC(=O)OC1=C(Br)C=C(C=C1Br)C(C)(C)C1=CC(Br)=C(OC(=O)CC)C(Br)=C1	CCC(=O)OC1=C(Br)C=C(C=C1Br)C(C)(C)C1=CC(Br)=C(OC(=O)CC)C(Br)=C1	InChI=1S/C21H20Br4O4/c1-5-17(26)28-19-13(22)7-11(8-14(19)23)21(3,4)12-9-15(24)20(16(25)10-12)29-18(27)6-2/h7-10H,5-6H2,1-4H3	C21H20Br4O4	656.003
DTXSID70872670	Chloroalkanes, C10-​14	85681-73-8
DTXSID5025150	Dimethyl phosphate	813-78-5	KKUKTXOBAWVSHC-UHFFFAOYSA-N	COP(O)(=O)OC	COP(O)(=O)OC	InChI=1S/C2H7O4P/c1-5-7(3,4)6-2/h1-2H3,(H,3,4)	C2H7O4P	126.048
DTXSID20477018	Benzene, 1,2,3-tribromo-4-(2,3-dibromophenoxy)-	327185-11-5	RQMSPGJESCCPQX-UHFFFAOYSA-N	BrC1=CC=CC(OC2=C(Br)C(Br)=C(Br)C=C2)=C1Br	BrC1=CC=CC(OC2=C(Br)C(Br)=C(Br)C=C2)=C1Br	InChI=1S/C12H5Br5O/c13-6-2-1-3-8(10(6)15)18-9-5-4-7(14)11(16)12(9)17/h1-5H	C12H5Br5O	564.691
DTXSID90179830	Phosphonium, tetrakis(hydroxymethyl)-, formate (salt)	25151-36-4	KSEKSWYSOJKTGU-UHFFFAOYSA-M	[O-]C=O.OC[P+](CO)(CO)CO	OCP(CO)(CO)CO	InChI=1S/C4H12O4P.CH2O2/c5-1-9(2-6,3-7)4-8;2-1-3/h5-8H,1-4H2;1H,(H,2,3)/q+1;/p-1	C5H13O6P	200.127
DTXSID001016701	1,3-bis(2,3-dibromopropyl)-5-(prop-2-en-1-yl)-1,3,5-triazinane-2,4,6-trione	75795-16-3	ZOEUJZVRQCHHCW-UHFFFAOYSA-N	BrCC(Br)CN1C(=O)N(CC=C)C(=O)N(CC(Br)CBr)C1=O	BrCC(Br)CN1C(=O)N(CC=C)C(=O)N(CC(Br)CBr)C1=O	InChI=1/C12H15Br4N3O3/c1-2-3-17-10(20)18(6-8(15)4-13)12(22)19(11(17)21)7-9(16)5-14/h2,8-9H,1,3-7H2	C12H15Br4N3O3	568.886
DTXSID40164493	Melem	1502-47-2	YSRVJVDFHZYRPA-UHFFFAOYSA-N	NC1=NC2=NC(N)=NC3=NC(N)=NC(=N1)N23	NC1=NC2=NC(N)=NC3=NC(N)=NC(=N1)N23	InChI=1S/C6H6N10/c7-1-10-4-12-2(8)14-6-15-3(9)13-5(11-1)16(4)6/h(H6,7,8,9,10,11,12,13,14,15)	C6H6N10	218.184
DTXSID70879886	BDE-64	446254-35-9	LDCXVFJUWKKBNY-UHFFFAOYSA-N	BrC1=CC=C(OC2=C(Br)C=CC(Br)=C2Br)C=C1	BrC1=CC=C(OC2=C(Br)C=CC(Br)=C2Br)C=C1	InChI=1S/C12H6Br4O/c13-7-1-3-8(4-2-7)17-12-10(15)6-5-9(14)11(12)16/h1-6H	C12H6Br4O	485.795
DTXSID3051206	Sodium aluminate	1302-42-7	IYJYQHRNMMNLRH-UHFFFAOYSA-N	[Na+].O=[Al-]=O		InChI=1S/Al.Na.2O/q-1;+1;;	AlNaO2	81.969
DTXSID5049817	Zinc carbonate	3486-35-9	FMRLDPWIRHBCCC-UHFFFAOYSA-L	[Zn++].[O-]C([O-])=O	OC(O)=O	InChI=1S/CH2O3.Zn/c2-1(3)4;/h(H2,2,3,4);/q;+2/p-2	CO3Zn	125.39
DTXSID20872786	1,2-Dibromo-4,5,6,7,8,8-hexachloro-2,3,3a,4,7,7a-hexahydro-4,7-methano-1H-indene	18300-04-4	RVVRZNVGDRBUJH-MPPHZFHBSA-N	[H][C@]12C[C@@H](Br)[C@H](Br)[C@@]1([H])[C@@]1(Cl)C(Cl)=C(Cl)[C@]2(Cl)C1(Cl)Cl	[H][C@]12C[C@@H](Br)[C@H](Br)[C@@]1([H])[C@@]1(Cl)C(Cl)=C(Cl)[C@]2(Cl)C1(Cl)Cl,ClC1=C(Cl)C2(Cl)C3C(Br)C(Br)CC3C1(Cl)C2(Cl)Cl	InChI=1/C10H6Br2Cl6/c11-3-1-2-4(5(3)12)9(16)7(14)6(13)8(2,15)10(9,17)18/h2-5H,1H2/t2-,3+,4-,5-,8-,9+/s2	C10H6Br2Cl6	498.67
DTXSID70274251	(2-Chloro-1-methylethyl) bis(2-chloropropyl) phosphate	76649-15-5	WDLBXPUJJVVRGX-UHFFFAOYSA-N	CC(Cl)COP(=O)(OCC(C)Cl)OC(C)CCl	CC(Cl)COP(=O)(OCC(C)Cl)OC(C)CCl	InChI=1/C9H18Cl3O4P/c1-7(11)5-14-17(13,15-6-8(2)12)16-9(3)4-10/h7-9H,4-6H2,1-3H3	C9H18Cl3O4P	327.56
DTXSID90879883	BDE-61	446254-32-6	NDRSXNBQWAOQPP-UHFFFAOYSA-N	BrC1=C(Br)C(Br)=C(Br)C(OC2=CC=CC=C2)=C1	BrC1=C(Br)C(Br)=C(Br)C(OC2=CC=CC=C2)=C1	InChI=1S/C12H6Br4O/c13-8-6-9(11(15)12(16)10(8)14)17-7-4-2-1-3-5-7/h1-6H	C12H6Br4O	485.795
DTXSID40724016	1,2,4-Tribromo-5-(3,4-dibromophenoxy)benzene	446254-80-4	VTMFEPLDDHZBGI-UHFFFAOYSA-N	BrC1=CC(Br)=C(Br)C=C1OC1=CC(Br)=C(Br)C=C1	BrC1=CC(Br)=C(Br)C=C1OC1=CC(Br)=C(Br)C=C1	InChI=1S/C12H5Br5O/c13-7-2-1-6(3-8(7)14)18-12-5-10(16)9(15)4-11(12)17/h1-5H	C12H5Br5O	564.691
DTXSID3097842	Ammonium polyphosphates	68333-79-9
DTXSID0052702	Dechlorane 602	31107-44-5	CDBKZZACXQLFMK-DSCPOPHVSA-N	[H][C@]12O[C@]3([H])[C@]([H])([C@@]1([H])[C@]1(Cl)C(Cl)=C(Cl)[C@@]2(Cl)C1(Cl)Cl)[C@]1(Cl)C(Cl)=C(Cl)[C@@]3(Cl)C1(Cl)Cl	[H][C@]12O[C@]3([H])[C@]([H])([C@@]1([H])[C@]1(Cl)C(Cl)=C(Cl)[C@@]2(Cl)C1(Cl)Cl)[C@]1(Cl)C(Cl)=C(Cl)[C@@]3(Cl)C1(Cl)Cl	InChI=1S/C14H4Cl12O/c15-3-5(17)11(21)7-1(9(3,19)13(11,23)24)2-8(27-7)12(22)6(18)4(16)10(2,20)14(12,25)26/h1-2,7-8H/t1-,2+,7+,8-,9-,10-,11-,12-/m0/s1	C14H4Cl12O	613.59
DTXSID5021758	Tris(2-butoxyethyl) phosphate	78-51-3	WTLBZVNBAKMVDP-UHFFFAOYSA-N	CCCCOCCOP(=O)(OCCOCCCC)OCCOCCCC	CCCCOCCOP(=O)(OCCOCCCC)OCCOCCCC	InChI=1S/C18H39O7P/c1-4-7-10-20-13-16-23-26(19,24-17-14-21-11-8-5-2)25-18-15-22-12-9-6-3/h4-18H2,1-3H3	C18H39O7P	398.477
DTXSID80772293	1,2-Dibromo-3-(2-bromophenoxy)benzene	147217-74-1	VRNGWCVCSHJUEJ-UHFFFAOYSA-N	BrC1=CC=CC(OC2=CC=CC=C2Br)=C1Br	BrC1=CC=CC(OC2=CC=CC=C2Br)=C1Br	InChI=1S/C12H7Br3O/c13-8-4-1-2-6-10(8)16-11-7-3-5-9(14)12(11)15/h1-7H	C12H7Br3O	406.899
DTXSID80220168	2,2',3,3',4,5,5',6'-Octabromobiphenyl	69887-11-2	SKGYJIOAIRCMIC-UHFFFAOYSA-N	BrC1=CC(Br)=C(Br)C(=C1Br)C1=CC(Br)=C(Br)C(Br)=C1Br	BrC1=CC(Br)=C(Br)C(=C1Br)C1=CC(Br)=C(Br)C(Br)=C1Br	InChI=1S/C12H2Br8/c13-4-1-3(8(16)12(20)11(4)19)7-9(17)5(14)2-6(15)10(7)18/h1-2H	C12H2Br8	785.38
DTXSID70565813	2,4-Dibromo-1-phenoxybenzene	171977-44-9	JMCIHKKTRDLVCO-UHFFFAOYSA-N	BrC1=CC(Br)=C(OC2=CC=CC=C2)C=C1	BrC1=CC(Br)=C(OC2=CC=CC=C2)C=C1	InChI=1S/C12H8Br2O/c13-9-6-7-12(11(14)8-9)15-10-4-2-1-3-5-10/h1-8H	C12H8Br2O	328.003
DTXSID40873533	2,2',3,3',4,4',5,6,6'-Nonabromo-1,1'-biphenyl	119264-62-9	LWICCBMIAPTSTO-UHFFFAOYSA-N	BrC1=CC(Br)=C(Br)C(Br)=C1C1=C(Br)C(Br)=C(Br)C(Br)=C1Br	BrC1=CC(Br)=C(Br)C(Br)=C1C1=C(Br)C(Br)=C(Br)C(Br)=C1Br	InChI=1S/C12HBr9/c13-2-1-3(14)6(15)7(16)4(2)5-8(17)10(19)12(21)11(20)9(5)18/h1H	C12HBr9	864.276
DTXSID8052693	2,2',3,4,4',5',6-Heptabromodiphenyl ether	207122-16-5	ILPSCQCLBHQUEM-UHFFFAOYSA-N	BrC1=CC(Br)=C(OC2=C(Br)C=C(Br)C(Br)=C2Br)C=C1Br	BrC1=CC(Br)=C(OC2=C(Br)C=C(Br)C(Br)=C2Br)C=C1Br	InChI=1S/C12H3Br7O/c13-4-1-6(15)9(3-5(4)14)20-12-8(17)2-7(16)10(18)11(12)19/h1-3H	C12H3Br7O	722.483
DTXSID20872665	Alkanes, C10-21, chloro	84082-38-2
DTXSID9020376	2,2',3,3',4,4',5,5',6,6'-Decabromodiphenyl ether	1163-19-5	WHHGLZMJPXIBIX-UHFFFAOYSA-N	BrC1=C(Br)C(Br)=C(OC2=C(Br)C(Br)=C(Br)C(Br)=C2Br)C(Br)=C1Br	BrC1=C(Br)C(Br)=C(OC2=C(Br)C(Br)=C(Br)C(Br)=C2Br)C(Br)=C1Br	InChI=1S/C12Br10O/c13-1-3(15)7(19)11(8(20)4(1)16)23-12-9(21)5(17)2(14)6(18)10(12)22	C12Br10O	959.171
DTXSID50879985	BDE-202	67797-09-5	AHNZLQAZTWRRDW-UHFFFAOYSA-N	BrC1=CC(Br)=C(Br)C(OC2=C(Br)C(Br)=CC(Br)=C2Br)=C1Br	BrC1=CC(Br)=C(Br)C(OC2=C(Br)C(Br)=CC(Br)=C2Br)=C1Br	InChI=1S/C12H2Br8O/c13-3-1-4(14)8(18)11(7(3)17)21-12-9(19)5(15)2-6(16)10(12)20/h1-2H	C12H2Br8O	801.379
DTXSID7034410	Calcium hydroxide	1305-62-0	AXCZMVOFGPJBDE-UHFFFAOYSA-L	O[Ca]O		InChI=1S/Ca.2H2O/h;2*1H2/q+2;;/p-2	CaH2O2	74.092
DTXSID90963559	Phenyl propan-2-yl hydrogen phosphate	46355-07-1	WRXFONORSZHETC-UHFFFAOYSA-N	CC(C)OP(O)(=O)OC1=CC=CC=C1	CC(C)OP(O)(=O)OC1=CC=CC=C1	InChI=1/C9H13O4P/c1-8(2)12-14(10,11)13-9-6-4-3-5-7-9/h3-8H,1-2H3,(H,10,11)	C9H13O4P	216.173

## Sheet: 2_Bevington2022_Supplement
dtxsid	stripped_casrn	casrn	chemical_name	molecular_formula	smiles	smiles_type	is_ndiscrete_with_CX	is_ndiscrete_without_CX	is_uncommon_congener	us_cpsc	us_epa_oppt	us_epa_ord	danish_epa	ea_uk	who_ipcs	efsa	eu	biomonitoring_california	health_canada	bergman_2012	forward_bergman	bolinus_morgan_wilkie	is_ohfr	is_onhfr	is_polyfr	is_iofr	is_fr	nas_ofr_category	comments_integrated	n_agg_dsrc	dsrc_score	nas_report	nas_analog	qsur_score
DTXSID4021426	57136	57-13-6	Urea	CH4N2O	NC(N)=O	qsar_ready_smiles	0	0	0	0	0	1	0	0	0	0	0	0	0	0	0	0	0	0	0	0	0		Minor use as part of mixture in fire extinguishing agent. This is urine. Also can be added as synergist but not a flame retardant on its own.	1	low	0	0	0.243883
DTXSID1021374	75252	75-25-2	Bromoform	CHBr3	BrC(Br)Br	qsar_ready_smiles	0	0	0	0	0	0	0	1	0	0	0	0	0	0	0	0	0	0	0	0	0		Physical-chemical properties, naturally occuring, used as intermediate, not a flame retardardant.	1	low	0	0	0.208849
DTXSID5026415	75638	75-63-8	Bromotrifluoromethane	CBrF3	FC(F)(F)Br	qsar_ready_smiles	0	0	0	0	0	1	0	0	0	0	0	0	0	0	0	0	0	0	0	0	0		Fluorinated gaseous fire suppressant/extinguisher. Do not think this is a flame retardant.	1	low	0	0	0.142937
DTXSID8025830	75956	75-95-6	Pentabromoethane	C2HBr5	BrC(Br)C(Br)(Br)Br	qsar_ready_smiles	0	0	0	1	0	0	0	1	0	0	0	0	0	1	0	0	1	0	0	0	1	polyhalogenated aliphatic chains		3	med	1	0	0.505382
DTXSID2020688	77474	77-47-4	Hexachlorocyclopentadiene	C5Cl6	ClC1=C(Cl)C(Cl)(Cl)C(Cl)=C1Cl	qsar_ready_smiles	0	0	0	1	0	1	0	1	1	0	1	0	1	1	1	0	1	0	0	0	1	polyhalogenated alicycles		8	high	1	0	0.802095
DTXSID6032192	78308	78-30-8	Tri-o-cresyl phosphate	C21H21O4P	CC1=C(OP(=O)(OC2=C(C)C=CC=C2)OC2=C(C)C=CC=C2)C=CC=C1	qsar_ready_smiles	0	0	0	1	0	1	1	0	0	0	0	0	0	0	1	0	0	1	0	0	1			4	high	0	0	0.886903
DTXSID70274039	78319	78-31-9	Diphenyl 4-tolyl phosphate	C19H17O4P	CC1=CC=C(OP(=O)(OC2=CC=CC=C2)OC2=CC=CC=C2)C=C1	qsar_ready_smiles	0	0	0	0	0	0	0	0	0	0	0	0	0	0	1	0	0	1	0	0	1			1	low	0	0	0.913278
DTXSID5052676	78320	78-32-0	Tris(4-methylphenyl) phosphate	C21H21O4P	CC1=CC=C(OP(=O)(OC2=CC=C(C)C=C2)OC2=CC=C(C)C=C2)C=C1	qsar_ready_smiles	0	0	0	0	0	1	0	0	0	0	0	0	0	0	1	0	0	1	0	0	1		non-halognated organic	2	med	0	0	0.886903
DTXSID3051466	78331	78-33-1	Tris(4-tert-butylphenyl) phosphate	C30H39O4P	CC(C)(C)C1=CC=C(OP(=O)(OC2=CC=C(C=C2)C(C)(C)C)OC2=CC=C(C=C2)C(C)(C)C)C=C1	qsar_ready_smiles	0	0	0	0	1	1	0	0	0	0	0	0	1	0	1	0	0	1	0	0	1			4	high	0	0	0.875545
DTXSID7025051	78386	78-38-6	Diethyl ethylphosphonate	C6H15O3P	CCOP(=O)(CC)OCC	qsar_ready_smiles	0	0	0	0	0	1	0	0	1	0	0	0	0	0	1	0	0	1	0	0	1			3	med	0	0	0.907352
DTXSID8026228	78400	78-40-0	Triethyl phosphate	C6H15O4P	CCOP(=O)(OCC)OCC	qsar_ready_smiles	0	0	0	1	1	1	0	0	1	0	1	0	1	1	1	0	0	1	0	0	1		organic-non-halognated	8	high	0	0	0.873561
DTXSID0021414	78422	78-42-2	Tris(2-ethylhexyl) phosphate	C24H51O4P	CCCCC(CC)COP(=O)(OCC(CC)CCCC)OCC(CC)CCCC	qsar_ready_smiles	0	0	0	0	0	1	1	0	1	0	1	0	1	1	1	0	0	1	0	0	1		organic-non-halognated	7	high	0	0	0.923286
DTXSID7023805	78433	78-43-3	Tris(2,3-dichloropropyl)phosphate	C9H15Cl6O4P	ClCC(Cl)COP(=O)(OCC(Cl)CCl)OCC(Cl)CCl	qsar_ready_smiles	0	0	0	1	0	1	0	0	1	0	0	0	0	1	1	0	1	0	0	0	1	polyhalogenated organophosphates		5	high	1	0	0.970271
DTXSID5021758	78513	78-51-3	Tris(2-butoxyethyl) phosphate	C18H39O7P	CCCCOCCOP(=O)(OCCOCCCC)OCCOCCCC	qsar_ready_smiles	0	0	0	0	0	1	1	0	1	0	1	0	1	1	1	1	0	1	0	0	1		organic-non-halognated	8	high	0	0	0.852912
DTXSID1026083	79276	79-27-6	1,1,2,2-Tetrabromoethane	C2H2Br4	BrC(Br)C(Br)Br	qsar_ready_smiles	0	0	0	1	0	0	0	1	0	0	0	0	0	0	0	0	1	0	0	0	1	polyhalogenated aliphatic chains		2	med	1	0	0.695863
DTXSID8058821	79287	79-28-7	Ethene, 1,1,2,2-tetrabromo-	C2Br4	BrC(Br)=C(Br)Br	qsar_ready_smiles	0	0	0	0	0	0	0	1	0	0	0	0	0	0	0	0	0	0	0	0	0		flag for physical chemcial properties, low flash point.	1	low	0	0	0.575094
DTXSID1026081	79947	79-94-7	3,3',5,5'-Tetrabromobisphenol A	C15H12Br4O2	CC(C)(C1=CC(Br)=C(O)C(Br)=C1)C1=CC(Br)=C(O)C(Br)=C1	qsar_ready_smiles	0	0	0	1	1	1	1	1	1	1	1	1	1	1	1	1	1	0	0	0	1	polyhalogenated bisphenol aliphatics and functionalized	OFR, old CAS number is 30496130 and was deleted, recommend use 79947	13	high	1	0	0.832179
DTXSID3021770	79958	79-95-8	2,2',6,6'-Tetrachlorobisphenol A	C15H12Cl4O2	CC(C)(C1=CC(Cl)=C(O)C(Cl)=C1)C1=CC(Cl)=C(O)C(Cl)=C1	qsar_ready_smiles	0	0	0	1	0	1	0	0	1	0	0	0	0	0	1	0	1	0	0	0	1	polyhalogenated bisphenol aliphatics and functionalized		4	high	1	0	0.832179
DTXSID7020182	80057	80-05-7	Bisphenol A	C15H16O2	CC(C)(C1=CC=C(O)C=C1)C1=CC=C(O)C=C1	qsar_ready_smiles	0	0	0	0	1	1	0	0	0	0	0	0	0	0	0	0	0	0	0	0	0		Group of chemists think this is unlikely a flame retardant. Primarily intermediate and breakdown product. Often co-reported with TBBPA.	2	med	0	0	0.695217
DTXSID1025017	80433	80-43-3	Dicumyl peroxide	C18H22O2	CC(C)(OOC(C)(C)C1=CC=CC=C1)C1=CC=CC=C1	qsar_ready_smiles	0	0	0	0	0	0	0	0	0	0	1	0	0	0	0	1	0	1	0	0	1			2	med	0	0	0.595482
DTXSID40889331	83863	83-86-3	myo-Inositol hexakisphosphate	C6H18O24P6	OP(O)(=O)OC1C(OP(O)(O)=O)C(OP(O)(O)=O)C(OP(O)(O)=O)C(OP(O)(O)=O)C1OP(O)(O)=O	qsar_ready_smiles	0	0	0	0	0	1	0	0	0	0	0	0	0	0	0	0	0	1	0	0	1		Group of chemists found additional evidence that suggests this chemical could be used as flame retardant under certain conditions	1	low	0	0	0.262634
DTXSID1049697	84151	84-15-1	o-Terphenyl	C18H14	C1=CC=C(C=C1)C1=CC=CC=C1C1=CC=CC=C1	qsar_ready_smiles	0	0	0	0	0	0	0	0	0	0	0	0	0	0	1	0	0	0	0	0	0		Group of chemists think these non-halogenated rings are unlikely to be used as flame retardants.	1	low	0	0	0.756998
DTXSID7021782	85223	85-22-3	2,3,4,5,6-Pentabromoethylbenzene	C8H5Br5	CCC1=C(Br)C(Br)=C(Br)C(Br)=C1Br	qsar_ready_smiles	0	0	0	1	1	1	1	0	1	1	1	1	0	1	1	0	1	0	0	0	1	polyhalogenated benzene aliphatics and functionalized	OFR	10	high	1	0	0.928042
DTXSID1024128	87821	87-82-1	Hexabromobenzene	C6Br6	BrC1=C(Br)C(Br)=C(Br)C(Br)=C1Br	qsar_ready_smiles	0	0	0	1	0	1	1	0	1	1	1	1	0	1	1	0	1	0	0	0	1	polyhalogenated benzenes	OFR	9	high	1	0	0.943529
DTXSID3025833	87832	87-83-2	Pentabromotoluene	C7H3Br5	CC1=C(Br)C(Br)=C(Br)C(Br)=C1Br	qsar_ready_smiles	0	0	0	1	0	1	1	1	1	1	1	1	0	1	1	1	1	0	0	0	1	polyhalogenated benzene aliphatics and functionalized	OFR	11	high	1	0	0.943465
DTXSID4025828	87843	87-84-3	Pentabromochlorocyclohexane	C6H6Br5Cl	ClC1C(Br)C(Br)C(Br)C(Br)C1Br	qsar_ready_smiles	0	0	0	1	1	0	0	0	1	0	0	0	0	0	1	1	1	0	0	0	1	polyhalogenated alicycles		5	high	1	0	0.836865
DTXSID1020142	91769	91-76-9	6-Phenyl-1,3,5-triazine-2,4-diamine	C9H9N5	NC1=NC(=NC(N)=N1)C1=CC=CC=C1	qsar_ready_smiles	0	0	0	0	0	0	0	0	0	0	0	0	0	0	1	0	0	1	0	0	1			1	low	0	0	0.767935
DTXSID2029117	92068	92-06-8	1,1':3',1''-Terphenyl	C18H14	C1=CC=C(C=C1)C1=CC(=CC=C1)C1=CC=CC=C1	qsar_ready_smiles	0	0	0	0	0	0	0	0	0	0	0	0	0	0	1	0	0	0	0	0	0		Group of chemists think these non-halogenated rings are unlikely to be used as flame retardants.	1	low	0	0	0.756998
DTXSID4024640	92660	92-66-0	4-Bromobiphenyl	C12H9Br	BrC1=CC=C(C=C1)C1=CC=CC=C1	qsar_ready_smiles	0	0	0	1	0	1	0	0	0	1	0	0	0	0	1	0	1	0	0	0	1	polyhalogenated benzenes		4	high	1	0	0.740258
DTXSID1059072	92864	92-86-4	1,1'-Biphenyl, 4,4'-dibromo-	C12H8Br2	BrC1=CC=C(C=C1)C1=CC=C(Br)C=C1	qsar_ready_smiles	0	0	0	1	0	1	0	0	0	1	0	0	0	0	1	0	1	0	0	0	1	polyhalogenated benzenes		4	high	1	0	0.687217
DTXSID6029121	92944	92-94-4	1,1':4',1''-Terphenyl	C18H14	C1=CC=C(C=C1)C1=CC=C(C=C1)C1=CC=CC=C1	qsar_ready_smiles	0	0	0	0	0	0	0	0	0	0	0	0	0	0	1	0	0	0	0	0	0		Group of chemists think these non-halogenated rings are unlikely to be used as flame retardants.	1	low	0	0	0.756998
DTXSID7052735	93527	93-52-7	1,2-dibromo(phenyl)ethane	C8H8Br2	BrCC(Br)C1=CC=CC=C1	qsar_ready_smiles	0	0	0	1	0	1	0	1	0	0	0	0	0	0	0	0	1	0	0	0	1	polyhalogenated benzene aliphatics and functionalized		3	med	1	0	0.947054
DTXSID8052641	95567	95-56-7	2-Bromophenol	C6H5BrO	OC1=C(Br)C=CC=C1	qsar_ready_smiles	0	0	0	0	0	1	0	0	0	0	0	0	0	0	1	0	0	0	0	0	0		Flammable, naturally occuring not FR, <50% Br in total, Team of chemists this thinks this is not a flame retardant.	2	med	0	0	0.592499
DTXSID7021817	96139	96-13-9	2,3-Dibromopropanol	C3H6Br2O	OCC(Br)CBr	qsar_ready_smiles	0	0	0	1	0	1	1	1	0	0	0	0	0	0	0	0	1	0	0	0	1	polyhalogenated aliphatic chains		4	high	1	0	0.866728
DTXSID7052737	96322	96-32-2	Methyl bromoacetate	C3H5BrO2	COC(=O)CBr	qsar_ready_smiles	0	0	0	0	0	0	0	1	0	0	0	0	0	0	0	0	0	0	0	0	0		flag for physical chemical properties, low flash point and high vapor pressure.	1	low	0	0	0.371443
DTXSID4021341	96695	96-69-5	4,4'-Thiobis(6-tert-butyl-m-cresol)	C22H30O2S	CC1=CC(O)=C(C=C1SC1=C(C)C=C(O)C(=C1)C(C)(C)C)C(C)(C)C	qsar_ready_smiles	0	0	0	0	0	0	0	1	0	0	0	0	0	0	0	0	0	0	0	0	0		Group of chemists think this is unlikely a flame retardant	1	low	0	0	0.431828
DTXSID2020426	99309	99-30-9	Dicloran	C6H4Cl2N2O2	NC1=C(Cl)C=C(C=C1Cl)[N+]([O-])=O	qsar_ready_smiles	0	0	0	0	1	0	0	0	0	0	0	0	0	0	0	0	0	0	0	0	0		Group of chemists reviewed data and think this is not likely used as a flame retardant.	1	low	0	0	0.435019
DTXSID0026252	101020	101-02-0	Triphenyl phosphite	C18H15O3P	O(P(OC1=CC=CC=C1)OC1=CC=CC=C1)C1=CC=CC=C1	qsar_ready_smiles	0	0	0	0	0	0	0	1	0	0	0	0	0	0	0	0	0	1	0	0	1			1	low	0	0	0.778199
DTXSID8023927	101553	101-55-3	p-Bromodiphenyl ether	C12H9BrO	BrC1=CC=C(OC2=CC=CC=C2)C=C1	qsar_ready_smiles	0	0	0	0	0	1	0	0	0	0	0	0	0	0	1	0	1	0	0	0	1	polyhalogenated diphenyl ethers		2	med	0	1	0.804748
DTXSID9021847	101848	101-84-8	Diphenyl oxide	C12H10O	O(C1=CC=CC=C1)C1=CC=CC=C1	qsar_ready_smiles	0	0	0	0	0	1	0	0	0	0	0	0	0	0	0	0	0	0	0	0	0		The source is pubmed hits associated with PBDEs. This chemical is combustable and has many other non-flame retardant uses.	1	low	0	0	0.71863
DTXSID9025326	102545	102-54-5	Ferrocene	C10H10Fe	[CH]1C=CC=C1	qsar_ready_smiles	0	0	0	0	0	0	0	0	1	0	0	0	0	0	0	1	0	0	0	1	1			2	med	0	0	0.37057
DTXSID9021392	102716	102-71-6	Triethanolamine	C6H15NO3	OCCN(CCO)CCO	qsar_ready_smiles	0	0	0	0	0	0	0	0	0	0	0	0	0	0	0	1	0	0	0	0	0		flag for physical chemical properties, high water solubility, low log KoW.	1	low	0	0	0.117231
DTXSID3051543	106412	106-41-2	4-Bromophenol	C6H5BrO	OC1=CC=C(Br)C=C1	qsar_ready_smiles	0	0	0	0	0	1	0	0	0	0	0	0	0	0	1	0	0	0	0	0	0		Naturally occuring. Highly reactive, only 1 bromine. Percent of mass is <50% p-chem properties in range. Team of chemists note this is intermeidate/highly reactive flame retardant.	2	med	0	0	0.426381
DTXSID2021238	108463	108-46-3	Resorcinol	C6H6O2	OC1=CC(O)=CC=C1	qsar_ready_smiles	0	0	0	0	0	1	0	0	0	0	0	0	0	0	0	0	0	0	0	0	0		Group of chemists think this is unlikely a flame retardant. Resocrcinol phosphate is a flame retardant. Resoricnol on its own is a drug, not likely flame retardnt	1	low	0	0	0.57328
DTXSID6020802	108781	108-78-1	Melamine	C3H6N6	NC1=NC(N)=NC(N)=N1	qsar_ready_smiles	0	0	0	1	1	1	0	1	1	0	1	0	1	0	1	1	0	1	0	0	1		organic-non-halognated	9	high	0	0	0.739152
DTXSID7024873	108805	108-80-5	Cyanuric acid	C3H3N3O3	OC1=NC(O)=NC(O)=N1	qsar_ready_smiles	0	0	0	0	0	1	0	0	0	0	1	0	0	0	0	0	0	1	0	0	1			2	med	0	0	0.701523
DTXSID2026941	115275	115-27-5	Chlorendic anhydride	C9H2Cl6O3	ClC1=C(Cl)C2(Cl)C3C(C(=O)OC3=O)C1(Cl)C2(Cl)Cl	qsar_ready_smiles	0	0	0	1	0	1	0	1	1	0	1	0	0	1	1	0	1	0	0	0	1	polyhalogenated carbocycles		7	high	1	0	0.813587
DTXSID2020268	115286	115-28-6	Chlorendic acid	C9H4Cl6O4	OC(=O)C1C(C(O)=O)C2(Cl)C(Cl)=C(Cl)C1(Cl)C2(Cl)Cl	qsar_ready_smiles	0	0	0	1	0	1	0	0	1	0	0	1	1	1	1	1	1	0	0	0	1	polyhalogenated carbocycles		8	high	1	0	0.751293
DTXSID2026943	115775	115-77-5	Pentaerythritol	C5H12O4	OCC(CO)(CO)CO	qsar_ready_smiles	0	0	0	0	1	1	0	1	0	0	0	0	0	0	1	0	0	1	0	0	1			4	high	0	0	0.556807
DTXSID1021952	115866	115-86-6	Triphenyl phosphate	C18H15O4P	O=P(OC1=CC=CC=C1)(OC1=CC=CC=C1)OC1=CC=CC=C1	qsar_ready_smiles	0	0	0	1	1	1	1	1	1	0	1	0	1	1	1	0	0	1	0	0	1		organic-non-halognated	10	high	0	0	0.907696
DTXSID1073157	115877	115-87-7	Bis(p-tert-butylphenyl) phenyl phosphate	C26H31O4P	CC(C)(C)C1=CC=C(OP(=O)(OC2=CC=CC=C2)OC2=CC=C(C=C2)C(C)(C)C)C=C1	qsar_ready_smiles	0	0	0	0	0	1	0	0	0	0	0	0	0	0	0	0	0	1	0	0	1			1	low	0	0	0.907367
DTXSID8074287	115888	115-88-8	Octyl diphenyl phosphate	C20H27O4P	CCCCCCCCOP(=O)(OC1=CC=CC=C1)OC1=CC=CC=C1	qsar_ready_smiles	0	0	0	0	0	0	0	1	1	0	0	0	0	0	1	1	0	1	0	0	1			4	high	0	0	0.934027
DTXSID7059432	115899	115-89-9	Phosphoric acid, methyl diphenyl ester	C13H13O4P	COP(=O)(OC1=CC=CC=C1)OC1=CC=CC=C1	qsar_ready_smiles	0	0	0	0	0	0	0	1	0	0	0	0	0	0	0	0	0	1	0	0	1			1	low	0	0	0.921593
DTXSID5021411	115968	115-96-8	Tris(2-chloroethyl) phosphate	C6H12Cl3O4P	ClCCOP(=O)(OCCCl)OCCCl	qsar_ready_smiles	0	0	0	1	0	1	1	1	1	0	1	1	1	1	1	1	1	0	0	0	1	polyhalogenated organophosphates	OFR	11	high	1	0	0.941206
DTXSID9051589	115980	115-98-0	Bis(2-chloroethyl) vinylphosphonate	C6H11Cl2O3P	ClCCOP(=O)(OCCCl)C=C	qsar_ready_smiles	0	0	0	1	0	0	0	0	1	0	0	0	0	0	0	0	1	0	0	0	1	polyhalogenated organophosphates		2	med	1	0	0.94632
DTXSID7026102	117088	117-08-8	Tetrachlorophthalic anhydride	C8Cl4O3	ClC1=C2C(=O)OC(=O)C2=C(Cl)C(Cl)=C1Cl	qsar_ready_smiles	0	0	0	1	0	1	0	1	1	0	1	0	0	1	1	0	1	0	0	0	1	polyhalogenated phthalates/benzoates/imides		7	high	1	0	0.777946
DTXSID6021959	118796	118-79-6	2,4,6-Tribromophenol	C6H3Br3O	OC1=C(Br)C=C(Br)C=C1Br	qsar_ready_smiles	0	0	0	1	1	1	1	1	1	1	1	1	0	1	1	1	1	0	0	0	1	polyhalogenated phenol derivatives	OFR	12	high	1	0	0.866389
DTXSID0024553	123773	123-77-3	Azodicarbonamide	C2H4N4O2	NC(=O)N=NC(N)=O	qsar_ready_smiles	0	0	0	0	0	1	0	0	0	0	0	0	0	0	0	0	0	1	0	0	1			1	low	0	0	0.262019
DTXSID5021330	124641	124-64-1	Tetramethylolphosphonium chloride	C4H12ClO4P	OCP(CO)(CO)CO	qsar_ready_smiles	0	1	0	1	1	0	0	1	1	0	0	0	0	0	0	1	0	1	0	0	1		This contains a Chloride ion but not a carbon-halogen bond so it is not considered an OFR	5	high	0	0	0.750605
DTXSID0041226	124732	124-73-2	1,2-Dibromotetrafluoroethane	C2Br2F4	FC(F)(Br)C(F)(F)Br	qsar_ready_smiles	0	0	0	0	0	0	0	1	0	0	0	0	0	0	0	0	0	0	0	0	0		fail, this is a fire extinguisher not a flame retardant, also p-chem outside of range	1	low	0	0	0.391097
DTXSID8040698	126716	126-71-6	Triisobutyl phosphate	C12H27O4P	CC(C)COP(=O)(OCC(C)C)OCC(C)C	qsar_ready_smiles	0	0	0	0	0	1	0	0	0	0	1	0	0	1	1	0	0	1	0	0	1			4	high	0	0	0.888614
DTXSID5021413	126727	126-72-7	Tris(2,3-dibromopropyl) phosphate	C9H15Br6O4P	BrCC(Br)COP(=O)(OCC(Br)CBr)OCC(Br)CBr	qsar_ready_smiles	0	0	0	1	1	1	1	0	1	1	1	0	0	1	1	1	1	0	0	0	1	polyhalogenated organophosphates	OFR	10	high	1	0	0.970909
DTXSID3021986	126738	126-73-8	Tributyl phosphate	C12H27O4P	CCCCOP(=O)(OCCCC)OCCCC	qsar_ready_smiles	0	0	0	0	1	1	1	1	0	0	1	0	1	1	1	1	0	1	0	0	1		organic-non-halognated	9	high	0	0	0.911274
DTXSID2027044	127093	127-09-3	Sodium acetate	C2H3NaO2	CC(O)=O	qsar_ready_smiles	0	0	0	0	0	1	0	0	0	0	0	0	0	0	0	0	0	0	0	0	0		Flag for physical-chemical properties. Low flash point, high vapor pressure, and; high water solubiliy.	1	low	0	0	0.214149
DTXSID4051665	132296	132-29-6	2Biphenylyl diphenyl phosphate	C24H19O4P	O=P(OC1=CC=CC=C1)(OC1=CC=CC=C1)OC1=C(C=CC=C1)C1=CC=CC=C1	qsar_ready_smiles	0	0	0	0	0	0	0	0	0	0	0	0	0	0	1	0	0	1	0	0	1			1	low	0	0	0.926261
DTXSID0026258	140089	140-08-9	Tris(2-chloroethyl) phosphite	C6H12Cl3O3P	ClCCOP(OCCCl)OCCCl	qsar_ready_smiles	0	0	0	1	0	0	0	0	1	0	0	0	0	0	1	0	1	0	0	0	1	polyhalogenated organophosphates		3	med	1	0	0.840175
DTXSID3043811	141833	141-83-3	Guanidine carboxamide	C2H6N4O	NC(=N)NC(N)=O	qsar_ready_smiles	0	0	0	0	0	0	0	1	0	0	0	0	0	0	0	0	0	0	0	0	0		physical-chemical property flag very low logKOW and very high water solubility. Pharma uses, may be an intermediate, not a flame retardant use.	1	low	0	0	0.245877
DTXSID5051733	147820	147-82-0	2,4,6-Tribromoaniline	C6H4Br3N	NC1=C(Br)C=C(Br)C=C1Br	qsar_ready_smiles	0	0	0	1	0	0	0	0	1	0	0	0	0	0	0	0	1	0	0	0	1	polyhalogenated benzene aliphatics and functionalized		2	med	1	0	0.793767
DTXSID1027134	298077	298-07-7	Bis(2-ethylhexyl) phosphate	C16H35O4P	CCCCC(CC)COP(O)(=O)OCC(CC)CCCC	qsar_ready_smiles	0	0	0	0	0	0	0	1	0	0	0	0	1	0	1	0	0	1	0	0	1		non-halognated organic	3	med	0	0	0.916064
DTXSID4026264	301133	301-13-3	Tris(2-ethylhexyl) phosphite	C24H51O3P	CCCCC(CC)COP(OCC(CC)CCCC)OCC(CC)CCCC	qsar_ready_smiles	0	0	0	0	0	0	0	1	0	0	0	0	0	0	0	0	0	1	0	0	1			1	low	0	0	0.768836
DTXSID8031865	335671	335-67-1	Perfluorooctanoic acid	C8HF15O2	OC(=O)C(F)(F)C(F)(F)C(F)(F)C(F)(F)C(F)(F)C(F)(F)C(F)(F)F	qsar_ready_smiles	0	0	0	0	0	1	0	0	0	0	0	0	0	0	0	0	0	0	0	0	0		This has 2 pubmed hits. Co-reported with flame retardants in article, PFOA is not a flame retardant	1	low	0	0	0.102627
DTXSID0027147	353593	353-59-3	Methane, bromochlorodifluoro-	CBrClF2	FC(F)(Cl)Br	qsar_ready_smiles	0	0	0	0	0	1	0	0	0	0	0	0	0	0	0	0	0	0	0	0	0		fluorinated gaseous fire suppressant, not a flame retardant.	1	low	0	0	0.208849
DTXSID1021403	512561	512-56-1	Trimethyl phosphate	C3H9O4P	COP(=O)(OC)OC	qsar_ready_smiles	0	0	0	0	0	1	0	1	0	0	0	0	0	1	1	0	0	1	0	0	1			4	high	0	0	0.889698
DTXSID70965470	512823	512-82-3	Tetrakis(hydroxymethyl)phosphanium hydroxide	C4H13O5P	OCP(CO)(CO)CO	qsar_ready_smiles	0	0	0	0	0	0	0	0	0	0	0	0	0	0	0	1	0	1	0	0	1			1	low	0	0	0.750605
DTXSID90199295	513020	513-02-0	Triisopropyl phosphate	C9H21O4P	CC(C)OP(=O)(OC(C)C)OC(C)C	qsar_ready_smiles	0	0	0	0	0	0	0	0	0	0	0	0	0	0	1	0	0	1	0	0	1		non-halognated organic	1	low	0	0	0.881303
DTXSID4052712	513086	513-08-6	Tripropyl phosphate	C9H21O4P	CCCOP(=O)(OCCC)OCCC	qsar_ready_smiles	0	0	0	0	0	1	0	0	0	0	1	0	0	1	1	0	0	1	0	0	1			4	high	0	0	0.89057
DTXSID5029186	542029	542-02-9	6-Methyl-1,3,5-triazine-2,4-diamine	C4H7N5	CC1=NC(N)=NC(N)=N1	qsar_ready_smiles	0	0	0	0	0	0	0	0	0	0	0	0	0	0	1	0	0	1	0	0	1			1	low	0	0	0.739152
DTXSID4052716	545551	545-55-1	Tri(aziridin-1-yl)phosphine oxide	C6H12N3OP	O=P(N1CC1)(N1CC1)N1CC1	qsar_ready_smiles	0	0	0	0	0	1	0	0	1	0	0	0	0	0	0	1	0	1	0	0	1		non-halognated organic	3	med	0	0	0.801385
DTXSID4049660	546930	546-93-0	Magnesium carbonate (1:1)	CMgO3	OC(O)=O	qsar_ready_smiles	0	0	0	0	0	1	0	0	0	0	0	0	0	0	1	0	0	0	0	0	0		Magnesium carbonate itself is antacid/ubiquitous. Magnseium carbonate hydroxide is a flame retardant.	2	med	0	0	0.271332
DTXSID4026216	563042	563-04-2	Tri-m-tolyl phosphate	C21H21O4P	CC1=CC=CC(OP(=O)(OC2=CC(C)=CC=C2)OC2=CC(C)=CC=C2)=C1	qsar_ready_smiles	0	0	0	0	0	1	0	1	0	0	0	0	0	0	1	0	0	1	0	0	1			3	med	0	0	0.886903
DTXSID9060449	591208	591-20-8	Phenol, 3-bromo-	C6H5BrO	OC1=CC(Br)=CC=C1	qsar_ready_smiles	0	0	0	0	0	0	0	0	0	0	0	0	0	0	1	0	0	0	0	0	0		Natually occuring, <50% Br in total, highly reactive. Related to similar chemcials that are OFRs, but group thinks this is intermediate/highly reactive unlikely to be flame retardant.	1	low	0	0	0.506374
DTXSID8021432	593602	593-60-2	Vinyl bromide	C2H3Br	BrC=C	qsar_ready_smiles	0	0	0	0	0	1	0	0	1	0	0	0	1	0	0	0	0	0	0	0	0		fail- p/chem. Intermediate used to make other chemicals like flame retardants. Highly flammable liquid/gas.	3	med	0	0	0.263556
DTXSID0029189	593851	593-85-1	Guanidine carbonate	C3H12N6O3	NC(N)=N	qsar_ready_smiles	0	0	0	0	0	0	0	1	0	0	0	0	0	0	0	0	0	0	0	0	0		physical-chemical property flag very low logKOW and very high water solubility. Many ubiqitious uses (mostly) buffer in cosmetics, but not a flame retardant use.	1	low	0	0	0.430349
DTXSID1044699	598027	598-02-7	Diethyl hydrogen phosphate	C4H11O4P	CCOP(O)(=O)OCC	qsar_ready_smiles	0	0	0	0	0	1	0	0	0	0	0	0	0	0	1	0	0	1	0	0	1		non-halognated organic	2	med	0	0	0.863718
DTXSID9027233	598721	598-72-1	2-Bromopropionic acid	C3H5BrO2	CC(Br)C(O)=O	qsar_ready_smiles	0	0	0	0	0	0	0	1	0	0	0	0	0	0	0	0	0	0	0	0	0		p-chem flag, likely intermediate, well-known precursor unintended presence in the product, if present, Group thinks this is not a flame retardant	1	low	0	0	0.340793
DTXSID1060558	607998	607-99-8	2,4,6-Tribromoanisole	C7H5Br3O	COC1=C(Br)C=C(Br)C=C1Br	qsar_ready_smiles	0	0	0	1	0	0	1	0	0	0	0	0	0	0	1	0	1	0	0	0	1	polyhalogenated phenol-aliphatic ether		3	med	1	0	0.907599
DTXSID0060561	608333	608-33-3	Phenol, 2,6-dibromo-	C6H4Br2O	OC1=C(Br)C=CC=C1Br	qsar_ready_smiles	0	0	0	0	0	0	0	0	0	0	0	0	0	0	1	0	1	0	0	0	1	polyhalogenated phenol derivatives		1	low	0	1	0.770364
DTXSID9022079	608719	608-71-9	Pentabromophenol	C6HBr5O	OC1=C(Br)C(Br)=C(Br)C(Br)=C1Br	qsar_ready_smiles	0	0	0	1	0	1	1	1	1	1	1	1	1	1	1	1	1	0	0	0	1	polyhalogenated phenol derivatives	OFR	12	high	1	0	0.927254
DTXSID90209646	608902	608-90-2	Benzene, pentabromo-	C6HBr5	BrC1=CC(Br)=C(Br)C(Br)=C1Br	qsar_ready_smiles	0	0	0	1	0	1	0	0	0	0	0	0	0	0	1	0	1	0	0	0	1	polyhalogenated benzenes		3	med	1	0	0.943529
DTXSID1052290	615587	615-58-7	2,4-Dibromophenol	C6H4Br2O	OC1=C(Br)C=C(Br)C=C1	qsar_ready_smiles	0	0	0	1	0	1	1	1	1	1	1	1	0	1	1	1	1	0	0	0	1	polyhalogenated phenol derivatives	OFR	11	high	1	0	0.76491
DTXSID3052307	626391	626-39-1	1,3,5Tribromobenzene	C6H3Br3	BrC1=CC(Br)=CC(Br)=C1	qsar_ready_smiles	0	0	0	0	0	0	0	0	0	0	0	0	0	0	1	0	1	0	0	0	1	polyhalogenated benzenes		1	low	0	0	0.829163
DTXSID6060896	632586	632-58-6	Tetrachlorophthalic acid	C8H2Cl4O4	OC(=O)C1=C(C(O)=O)C(Cl)=C(Cl)C(Cl)=C1Cl	qsar_ready_smiles	0	0	0	0	0	0	0	0	0	0	0	0	0	0	0	1	1	0	0	0	1	polyhalogenated phthalates/benzoates/imides		1	low	0	0	0.82157
DTXSID6026084	632791	632-79-1	4,5,6,7-Tetrabromo-1,3-Isobenzofurandione	C8Br4O3	BrC1=C2C(=O)OC(=O)C2=C(Br)C(Br)=C1Br	qsar_ready_smiles	0	0	0	1	1	1	1	1	1	0	0	1	0	1	1	0	1	0	0	0	1	polyhalogenated phthalates/benzoates/imides	OFR	9	high	1	0	0.777946
DTXSID7060910	636282	636-28-2	1,2,4,5Tetrabromobenzene	C6H2Br4	BrC1=CC(Br)=C(Br)C=C1Br	qsar_ready_smiles	0	0	0	0	0	0	0	0	0	0	0	0	0	0	1	0	1	0	0	0	1	polyhalogenated benzenes		1	low	0	0	0.84523
DTXSID3060950	645921	645-92-1	1,3,5-Triazin-2(1H)-one, 4,6-diamino-	C3H5N5O	NC1=NC(N)=NC(=O)N1	qsar_ready_smiles	0	0	0	0	0	0	0	0	0	0	0	0	0	0	1	0	0	1	0	0	1			1	low	0	0	0.554254
DTXSID4074932	756138	756-13-8	Perfluoro-2-methyl-3-pentanone	C6F12O	FC(F)(F)C(F)(F)C(=O)C(F)(C(F)(F)F)C(F)(F)F	qsar_ready_smiles	0	0	0	0	0	1	0	0	0	0	0	0	0	0	0	0	0	0	0	0	0		This has 1 pubmed hit. No mention of Flame retardant in article, photolysis/atmospheric fate article, not a flame retardant.	1	low	0	0	0.113268
DTXSID0020494	756796	756-79-6	Dimethyl methylphosphonate	C3H9O3P	COP(C)(=O)OC	qsar_ready_smiles	0	0	0	1	1	1	0	0	1	0	0	0	0	0	1	1	0	1	0	0	1			6	high	0	0	0.908774
DTXSID9041861	762049	762-04-9	Diethyl phosphite	C4H11O3P	CCOP(O)OCC	qsar_ready_smiles	0	0	0	0	0	0	0	1	0	0	0	0	0	0	0	0	0	0	0	0	0		flag for physical-chemical properties. Low flash point and high vapor pressure.	1	low	0	0	0.429974
DTXSID2022121	791286	791-28-6	Triphenylphosphine oxide	C18H15OP	O=P(C1=CC=CC=C1)(C1=CC=CC=C1)C1=CC=CC=C1	qsar_ready_smiles	0	0	0	0	0	0	0	1	0	0	0	0	0	0	1	0	0	1	0	0	1			2	med	0	0	0.897193
DTXSID20400487	813763	813-76-3	diethylphosphinic acid	C4H11O2P	CCP(O)(=O)CC	qsar_ready_smiles	0	0	0	0	0	0	0	0	0	0	1	0	0	0	1	0	0	1	0	0	1		non-halognated organic	2	med	0	0	0.855979
DTXSID5025150	813785	813-78-5	Dimethyl phosphate	C2H7O4P	COP(O)(=O)OC	qsar_ready_smiles	0	0	0	0	0	1	0	0	0	0	0	0	0	0	1	0	0	1	0	0	1		non-halognated organic	2	med	0	0	0.885322
DTXSID2061149	814299	814-29-9	Tributylphosphine oxide	C12H27OP	CCCCP(=O)(CCCC)CCCC	qsar_ready_smiles	0	0	0	0	0	0	0	0	0	0	0	0	0	0	1	0	0	1	0	0	1			1	low	0	0	0.882131
DTXSID1048207	838857	838-85-7	Diphenyl phosphate	C12H11O4P	OP(=O)(OC1=CC=CC=C1)OC1=CC=CC=C1	qsar_ready_smiles	0	0	0	0	0	0	0	0	0	0	0	0	0	0	1	0	0	1	0	0	1			1	low	0	0	0.906906
DTXSID4026266	839907	839-90-7	Tris(2-hydroxyethyl) isocyanurate	C9H15N3O6	OCCN1C(=O)N(CCO)C(=O)N(CCO)C1=O	qsar_ready_smiles	0	0	0	0	1	0	0	0	0	0	0	0	0	0	0	0	0	1	0	0	1			1	low	0	0	0.492735
DTXSID5020493	868859	868-85-9	Dimethyl phosphonate	C2H7O3P	COP(=O)OC	qsar_ready_smiles	0	0	0	1	0	0	0	0	1	0	0	0	0	0	0	0	0	1	0	0	1			2	med	0	0	0.764677
DTXSID20439075	875730	875-73-0	Tribromostyrene	C8H5Br3	BrC(Br)=C(Br)C1=CC=CC=C1	qsar_ready_smiles	0	0	0	1	0	0	0	0	0	0	0	0	0	0	0	0	1	0	0	0	1	polyhalogenated benzene aliphatics and functionalized	see supplemental NAS note	1	low	1	0	0.664159
DTXSID60919462	919620	919-62-0	Tris(3methylbutyl) phosphate	C15H33O4P	CC(C)CCOP(=O)(OCCC(C)C)OCCC(C)C	qsar_ready_smiles	0	0	0	0	0	0	0	0	0	0	0	0	0	0	1	0	0	1	0	0	1			1	low	0	0	0.877472
DTXSID2052738	995324	995-32-4	Tetraethyl ethylenebisphosphonate	C10H24O6P2	CCOP(=O)(CCP(=O)(OCC)OCC)OCC	qsar_ready_smiles	0	0	0	0	0	0	0	0	0	0	0	0	0	0	1	0	0	1	0	0	1			1	low	0	0	0.907352
DTXSID4061412	1017567	1017-56-7	1,3,5-Triazine-2,4,6-triyltriiminotrimethanol	C6H12N6O3	OCNC1=NC(NCO)=NC(NCO)=N1	qsar_ready_smiles	0	0	0	0	0	0	0	0	0	0	0	0	0	0	0	1	0	1	0	0	1			1	low	0	0	0.548263
DTXSID9040213	1067125	1067-12-5	Tris(hydroxymethyl)phosphine oxide	C3H9O4P	OCP(=O)(CO)CO	qsar_ready_smiles	0	0	0	1	0	0	0	0	0	0	0	0	0	0	0	0	0	1	0	0	1			1	low	0	0	0.824997
DTXSID80862522	1067987	1067-98-7	Tris(3-chloropropyl)phosphate	C9H18Cl3O4P	ClCCCOP(=O)(OCCCCl)OCCCCl	qsar_ready_smiles	0	0	0	0	0	0	0	0	0	0	0	0	0	0	1	1	1	0	0	0	1	polyhalogenated organophosphates		2	med	0	1	0.939041
DTXSID9020376	1163195	1163-19-5	1,1'-Oxybis[2,3,4,5,6-pentabromobenzene]	C12Br10O	BrC1=C(Br)C(Br)=C(OC2=C(Br)C(Br)=C(Br)C(Br)=C2Br)C(Br)=C1Br	qsar_ready_smiles	0	0	0	1	1	1	1	1	1	1	1	1	1	0	1	1	1	0	0	0	1	polyhalogenated diphenyl ethers	OFR	12	high	1	0	0.98377
DTXSID1025300	1241947	1241-94-7	2-Ethylhexyl diphenyl phosphate	C20H27O4P	CCCCC(CC)COP(=O)(OC1=CC=CC=C1)OC1=CC=CC=C1	qsar_ready_smiles	0	0	0	1	0	1	0	1	1	0	1	0	0	0	1	0	0	1	0	0	1		organic-non-halognated	6	high	0	0	0.940754
DTXSID3051206	1302427	1302-42-7	Sodium aluminate	AlNaO2	[Na+].O=[Al-]=O	canonical_smiles	0	0	0	0	0	1	0	1	1	0	1	0	0	0	0	0	0	0	0	1	1			4	high	0	0	0.89764
DTXSID6030782	1302789	1302-78-9	Bentonite				0	0	0	0	0	1	0	0	0	0	0	0	0	0	0	0	0	0	0	1	1			1	low	0	0	0
DTXSID7034387	1303862	1303-86-2	Boric oxide	B2O3	[B+3].[B+3].[O--].[O--].[O--]	canonical_smiles	0	0	0	1	0	0	0	1	0	0	0	0	0	0	0	0	0	0	0	1	1			2	med	0	0	0.744151
DTXSID2034384	1303964	1303-96-4	Borax (B4Na2O7.10H2O)		B1(OB2OB(OB(O1)O2)[O-])[O-].O.O.O.O.O.O.O.O.O.O.[Na+].[Na+]	pubchem_smiles	0	0	0	0	0	0	0	1	1	0	0	0	0	0	1	0	0	0	0	1	1			3	med	0	0	0.897309
DTXSID7034410	1305620	1305-62-0	Calcium hydroxide	CaH2O2	O[Ca]O	canonical_smiles	0	0	0	0	0	1	0	0	0	0	1	0	0	0	0	0	0	0	0	1	1			2	med	0	0	0.797142
DTXSID4049662	1309428	1309-42-8	Magnesium hydroxide	H2MgO2	[OH-].[OH-].[Mg++]	canonical_smiles	0	0	0	1	1	1	1	1	1	0	1	0	0	0	1	1	0	0	0	1	1		Inorganic	9	high	0	0	0.721658
DTXSID4023880	1309644	1309-64-4	Antimony trioxide	O3Sb2	O=[Sb]O[Sb]=O	canonical_smiles	0	0	0	1	1	1	0	1	1	0	1	0	1	0	1	1	0	0	0	1	1		Inorganic	9	high	0	0	0.862106
DTXSID7020899	1313275	1313-27-5	Molybdenum trioxide	MoO3	O=[Mo](=O)=O	canonical_smiles	0	0	0	0	0	0	0	0	1	0	0	0	0	0	0	0	0	0	0	1	1			1	low	0	0	0.752509
DTXSID7035016	1314132	1314-13-2	Zinc oxide	OZn	[O--].[Zn++]	canonical_smiles	0	0	0	1	0	1	0	0	1	0	0	0	0	0	0	0	0	0	0	1	1		inorganic	3	med	0	0	0.80702
DTXSID7032262	1314358	1314-35-8	Tungsten trioxide	O3W	O=[W](=O)=O	canonical_smiles	0	0	0	0	0	0	0	0	0	0	0	0	0	0	0	1	0	0	0	1	1			1	low	0	0	0.799005
DTXSID9047754	1314563	1314-56-3	Phosphorus pentoxide	O10P4	O=P12OP3(=O)OP(=O)(O1)OP(=O)(O2)O3	canonical_smiles	0	0	0	0	0	1	0	0	0	0	0	0	0	0	0	0	0	0	0	1	1			1	low	0	0	0.873993
DTXSID6050467	1314609	1314-60-9	Antimony pentoxide	O5Sb2	O=[Sb](=O)O[Sb](=O)=O	canonical_smiles	0	0	0	1	0	0	0	0	1	0	0	0	0	0	0	0	0	0	0	1	1			2	med	0	0	0.862106
DTXSID7042518	1314983	1314-98-3	Zinc sulfide	SZn	[S--].[Zn++]	canonical_smiles	0	0	0	0	0	0	0	1	0	0	0	0	0	0	0	0	0	0	0	1	1			1	low	0	0	0.80702
DTXSID7047489	1318009	1318-00-9	Vermiculite				0	0	0	0	0	1	0	0	0	0	0	0	0	0	0	0	0	0	0	1	1			1	low	0	0	0
DTXSID4051661	1318236	1318-23-6	Boehmite	AlHO2	O[Al]=O	canonical_smiles	0	0	0	0	1	1	0	0	0	0	1	0	0	0	0	0	0	0	0	1	1			3	med	0	0	0.862229
DTXSID2034388	1330434	1330-43-4	Sodium tetraborate (Na2B4O7)		B1(OB2OB(OB(O1)O2)[O-])[O-].[Na+].[Na+]	pubchem_smiles	0	0	0	0	0	1	0	0	0	0	0	0	0	0	0	0	0	0	0	1	1			1	low	0	0	0.897309
DTXSID4021391	1330785	1330-78-5	Tris(methylphenyl) phosphate		CC1=CC=C(C=C1)OP(=O)(OC2=CC=C(C=C2)C)OC3=CC=C(C=C3)C	pubchem_smiles	0	0	0	1	1	1	0	1	1	0	1	0	1	1	1	1	0	1	0	0	1		Ill-defined substance; mixture of isomeric tritolyl phosphates, usually excluding the very toxic ortho-isomer as much as possible. (Merck) organic-non-halogenated	10	high	0	0	0.886903
DTXSID6091554	1332076	1332-07-6	Zinc borate	B2O6Zn3	[Zn++].[Zn++].[Zn++].[O-]B([O-])[O-].[O-]B([O-])[O-]	canonical_smiles	0	0	0	1	1	1	0	1	1	0	0	0	1	0	0	1	0	0	0	1	1		Inorganic	7	high	0	0	0.881998
DTXSID4023888	1332214	1332-21-4	Asbestos				0	0	0	0	0	1	0	0	0	0	0	0	0	0	0	0	0	0	0	0	0		Asbestos is not a flame retardant.	1	low	0	0	0
DTXSID9061677	1332816	1332-81-6	Antimony oxide (Sb2O4)	O4Sb2	O=[Sb]O[Sb](=O)=O	canonical_smiles	0	0	0	0	0	0	0	1	0	0	0	0	0	0	1	0	0	0	0	1	1			2	med	0	0	0.862106
DTXSID5024267	1336363	1336-36-3	Polychlorinated biphenyls				0	0	0	0	0	0	0	0	1	0	0	0	0	0	0	0	0	0	0	0	0		PCBs are out of scope.	1	low	0	0	0
DTXSID9029647	1344098	1344-09-8	Sodium silicate				0	0	0	0	0	0	0	0	1	0	0	0	0	0	0	0	0	0	0	0	0		flag-reactive. Highly soluble "water glass" mostly used as pH stabilizer	1	low	0	0	0
DTXSID2041593	1344281	1344-28-1	Alumina		[O-2].[O-2].[O-2].[Al+3].[Al+3]	pubchem_smiles	0	0	0	0	0	0	0	1	0	0	0	0	0	0	0	0	0	0	0	1	1			1	low	0	0	0.784643
DTXSID6030732	1345046	1345-04-6	Antimony trisulfide colloid	S3Sb2	S=[Sb]S[Sb]=S	canonical_smiles	0	0	0	0	0	0	0	1	0	0	0	0	0	0	0	0	0	0	0	0	0		Appears on Table A7.1 “many of these substances appear not to be flame retardants, but substances that are fire fighting agents, chemical intermediates or used for other purposes” If a chemical appeared only on this list and no other data source it was removed as a flame retardant.	1	low	0	0	0.441489
DTXSID40164493	1502472	1502-47-2	Melem 1,3,4,6,7,9,9b-Heptaazaphenalene-2,5,8-triamine	C6H6N10	NC1=NC2=NC(N)=NC3=NC(N)=NC(=N1)N23	qsar_ready_smiles	0	0	0	0	0	0	0	1	0	0	0	0	0	0	0	0	0	1	0	0	1			1	low	0	0	0.665055
DTXSID9024641	1522925	1522-92-5	3-Bromo-2,2-bis(bromomethyl)propanol	C5H9Br3O	OCC(CBr)(CBr)CBr	qsar_ready_smiles	0	0	0	1	0	1	1	0	0	1	1	0	0	1	1	0	1	0	0	0	1	polyhalogenated aliphatic chains	OFR	7	high	1	0	0.810405
DTXSID1061946	1754478	1754-47-8	Phosphonic acid, Pphenyl, dioctyl ester	C22H39O3P	CCCCCCCCOP(=O)(OCCCCCCCC)C1=CC=CC=C1	qsar_ready_smiles	0	0	0	0	0	0	0	0	0	0	0	0	0	0	1	0	0	1	0	0	1			1	low	0	0	0.935037
DTXSID1051802	1770805	1770-80-5	Dibutyl chlorendate	C17H20Cl6O4	CCCCOC(=O)C1C(C(=O)OCCCC)C2(Cl)C(Cl)=C(Cl)C1(Cl)C2(Cl)Cl	qsar_ready_smiles	0	0	0	1	0	0	0	0	1	0	0	0	0	0	1	0	1	0	0	0	1	polyhalogenated carbocycles		3	med	1	0	0.828717
DTXSID3040306	1773893	1773-89-3	Chlorendate dimethyl	C11H8Cl6O4	COC(=O)C1C(C(=O)OC)C2(Cl)C(Cl)=C(Cl)C1(Cl)C2(Cl)Cl	qsar_ready_smiles	0	0	0	1	0	0	0	0	1	0	0	0	0	0	0	0	1	0	0	0	1	polyhalogenated carbocycles		2	med	1	0	0.845053
DTXSID6026246	1806548	1806-54-8	Trioctyl phosphate	C24H51O4P	CCCCCCCCOP(=O)(OCCCCCCCC)OCCCCCCCC	qsar_ready_smiles	0	0	0	0	0	1	0	1	1	0	0	0	0	0	0	0	0	1	0	0	1		non-halognated organic	3	med	0	0	0.910719
DTXSID4052687	1837918	1837-91-8	Benzene hexabromide	C6H6Br6	BrC1C(Br)C(Br)C(Br)C(Br)C1Br	qsar_ready_smiles	0	0	0	1	0	1	0	0	1	0	0	0	0	0	0	0	1	0	0	0	1	polyhalogenated alicycles		3	med	1	0	0.836865
DTXSID201016688	1951979	1951-97-9	Piperazine, phosphate (1:?)				0	0	0	0	0	0	0	0	0	0	0	0	0	0	1	0	0	1	0	1	1			1	low	0	0	0
DTXSID40174330	2039829	2039-82-9	4Bromostyrene	C8H7Br	BrC1=CC=C(C=C)C=C1	qsar_ready_smiles	0	0	0	0	0	0	0	0	0	0	0	0	0	0	1	0	0	0	0	0	0		<50% Bromine, not likely FR	1	low	0	0	0.21471
DTXSID60174332	2039863	2039-86-3	3-Bromostyrene	C8H7Br	BrC1=CC=CC(C=C)=C1	qsar_ready_smiles	0	0	0	0	0	0	0	0	0	0	0	0	0	0	1	0	0	0	0	0	0		only 1 data source, PUBCHEM has 4 hits for flame retardant in title BUT they are related to "Flame retardanta AND intermediate" Team of chemists thinks this is not a flame retaradant	1	low	0	0	0.21471
DTXSID9024015	2050477	2050-47-7	4,4'-Dibromodiphenyl ether	C12H8Br2O	BrC1=CC=C(OC2=CC=C(Br)C=C2)C=C1	qsar_ready_smiles	0	0	0	0	0	1	0	0	0	0	0	0	0	0	1	0	1	0	0	0	1	polyhalogenated diphenyl ethers		2	med	0	1	0.768854
DTXSID5024639	2113577	2113-57-7	3-Bromobiphenyl	C12H9Br	BrC1=CC=CC(=C1)C1=CC=CC=C1	qsar_ready_smiles	0	0	1	0	0	0	0	0	0	0	0	0	0	0	1	0	1	0	0	0	1	polyhalogenated benzenes		1	low	0	1	0.740258
DTXSID6025800	2234131	2234-13-1	1,2,3,4,5,6,7,8-Octachloronaphthalene	C10Cl8	ClC1=C(Cl)C2=C(Cl)C(Cl)=C(Cl)C(Cl)=C2C(Cl)=C1Cl	qsar_ready_smiles	0	0	0	0	0	0	0	0	0	0	0	0	0	0	1	0	1	0	0	0	1	polyhalogenated carbocycles		1	low	0	0	0.892526
DTXSID2062325	2314978	2314-97-8	Trifluoroiodomethane	CF3I	FC(F)(F)I	qsar_ready_smiles	0	0	0	0	0	1	0	0	0	0	0	0	0	0	0	0	0	0	0	0	0		This has 2 pubmed hits not as flame retardants. This is a fluorinated gaseous fire suppression agent, remove.	1	low	0	0	0.142937
DTXSID7020895	2385855	2385-85-5	Mirex	C10Cl12	ClC12C3(Cl)C4(Cl)C5(Cl)C(Cl)(C1(Cl)C4(Cl)Cl)C2(Cl)C(Cl)(Cl)C35Cl	qsar_ready_smiles	0	0	0	1	0	1	0	0	1	0	1	0	0	1	1	1	1	0	0	0	1	polyhalogenated carbocycles		7	high	1	0	0.864801
DTXSID80858783	2502150	2502-15-0	Tris(4-isopropylphenyl) phosphate	C27H33O4P	CC(C)C1=CC=C(OP(=O)(OC2=CC=C(C=C2)C(C)C)OC2=CC=C(C=C2)C(C)C)C=C1	qsar_ready_smiles	0	0	0	0	0	1	0	0	0	0	0	0	0	1	1	0	0	1	0	0	1		non-halognated organic	3	med	0	0	0.887289
DTXSID50873428	2528361	2528-36-1	Dibutyl phenyl phosphate	C14H23O4P	CCCCOP(=O)(OCCCC)OC1=CC=CC=C1	qsar_ready_smiles	0	0	0	0	0	1	0	0	0	0	0	0	0	0	1	0	0	1	0	0	1			2	med	0	0	0.934065
DTXSID3052698	2528383	2528-38-3	Tripentyl phosphate	C15H33O4P	CCCCCOP(=O)(OCCCCC)OCCCCC	qsar_ready_smiles	0	0	0	0	0	1	0	0	0	0	0	0	0	0	1	0	0	1	0	0	1		non-halognated organic	2	med	0	0	0.911274
DTXSID1074597	2528394	2528-39-4	Phosphoric acid, trihexyl ester	C18H39O4P	CCCCCCOP(=O)(OCCCCCC)OCCCCCC	qsar_ready_smiles	0	0	0	0	0	1	0	0	0	0	0	0	0	0	1	0	0	1	0	0	1		non-halognated organic	2	med	0	0	0.913543
DTXSID8052699	2623872	2623-87-2	4-Bromobutyric acid	C4H7BrO2	OC(=O)CCCBr	qsar_ready_smiles	0	0	0	0	0	0	0	1	0	0	0	0	0	0	0	0	0	0	0	0	0		p-chem flag, likely intermediate, well-known precursor unintended presence in the product, if present, Team of chemists thinks this is not a flame retardant	1	low	0	0	0.327056
DTXSID1062623	2752956	2752-95-6	Butyl diphenyl phosphate	C16H19O4P	CCCCOP(=O)(OC1=CC=CC=C1)OC1=CC=CC=C1	qsar_ready_smiles	0	0	0	0	0	1	0	0	0	0	0	0	0	0	1	0	0	1	0	0	1		non-halognated organic	2	med	0	0	0.934065
DTXSID2029242	2781115	2781-11-5	Diethyl (N,N-bis(2-hydroxyethyl)amino)methanephosphonate	C9H22NO5P	CCOP(=O)(CN(CCO)CCO)OCC	qsar_ready_smiles	0	0	0	0	1	1	0	0	1	0	0	0	1	0	0	0	0	1	0	0	1			4	high	0	0	0.714626
DTXSID50950561	2788116	2788-11-6	Tris(2,4dibromophenyl) phosphate	C18H9Br6O4P	BrC1=CC(Br)=C(OP(=O)(OC2=C(Br)C=C(Br)C=C2)OC2=C(Br)C=C(Br)C=C2)C=C1	qsar_ready_smiles	0	0	0	0	0	0	0	0	0	0	0	0	0	0	1	0	1	0	0	0	1	polyhalogenated organophosphates		1	low	0	0	0.925774
DTXSID6023028	2809214	2809-21-4	Etidronic acid	C2H8O7P2	CC(O)(P(O)(O)=O)P(O)(O)=O	qsar_ready_smiles	0	0	0	0	0	0	0	0	0	0	0	0	0	0	1	0	0	1	0	0	1		Group of chemists found evidence that this chemical could be used as a flame retardant despite p-chem properties.	1	low	0	0	0.660982
DTXSID2024951	3066704	3066-70-4	2,3-Dibromopropylmethacrylate	C7H10Br2O2	CC(=C)C(=O)OCC(Br)CBr	qsar_ready_smiles	0	0	0	1	0	0	0	1	0	0	0	0	0	0	0	0	1	0	0	0	1	polyhalogenated aliphatic carboxylate		2	med	1	0	0.868103
DTXSID0052700	3072842	3072-84-2	2,2'-[(1-Methylethylidene)bis[(2,6-dibromo-4,1-phenylene)oxymethylene]]bis[oxirane]	C21H20Br4O4	CC(C)(C1=CC(Br)=C(OCC2CO2)C(Br)=C1)C1=CC(Br)=C(OCC2CO2)C(Br)=C1	qsar_ready_smiles	0	0	0	1	0	1	1	1	0	1	1	0	0	1	1	0	1	0	0	0	1	polyhalogenated bisphenol aliphatics and functionalized		8	high	1	0	0.817281
DTXSID4027527	3194556	3194-55-6	1,2,5,6,9,10-Hexabromocyclododecane	C12H18Br6	BrC1CCC(Br)C(Br)CCC(Br)C(Br)CCC1Br	qsar_ready_smiles	0	0	0	1	1	1	1	0	1	0	1	1	1	1	1	0	1	0	0	0	1	polyhalogenated alicycles	OFR	10	high	1	0	0.808216
DTXSID0052750	3194578	3194-57-8	1,2,5,6-Tetrabromocyclooctane	C8H12Br4	BrC1CCC(Br)C(Br)CCC1Br	qsar_ready_smiles	0	0	0	1	1	1	1	1	0	1	1	0	1	1	1	1	1	0	0	0	1	polyhalogenated alicycles	OFR	11	high	1	0	0.808216
DTXSID90274233	3234024	3234-02-4	2,3-Dibromo-2-butene-1,4-diol	C4H6Br2O2	OCC(Br)=C(Br)CO	qsar_ready_smiles	0	0	0	1	0	0	1	1	1	0	1	0	0	0	0	0	1	0	0	0	1	polyhalogenated aliphatic chains		5	high	1	0	0.338639
DTXSID3044918	3278895	3278-89-5	1,3,5-Tribromo-2-(prop-2-en-1-yloxy)benzene	C9H7Br3O	BrC1=CC(Br)=C(OCC=C)C(Br)=C1	qsar_ready_smiles	0	0	0	1	1	1	1	0	1	1	0	1	1	1	1	1	1	0	0	0	1	polyhalogenated phenol-aliphatic ether	OFR	11	high	1	0	0.900499
DTXSID3027530	3290924	3290-92-4	Trimethylolpropane trimethacrylate	C18H26O6	CCC(COC(=O)C(C)=C)(COC(=O)C(C)=C)COC(=O)C(C)=C	qsar_ready_smiles	0	0	0	0	0	0	0	1	0	0	0	0	0	0	0	0	0	0	0	0	0		Group of chemists think this is unlikely flame retardant.	1	low	0	0	0.464361
DTXSID9020164	3296900	3296-90-0	Pentaerythritol dibromide	C5H10Br2O2	OCC(CO)(CBr)CBr	qsar_ready_smiles	0	0	0	1	0	1	1	0	1	1	1	1	1	1	1	1	1	0	0	0	1	polyhalogenated aliphatic chains	OFR	11	high	1	0	0.805275
DTXSID8024947	3322938	3322-93-8	1,2-Dibromo-4-(1,2-dibromoethyl)cyclohexane	C8H12Br4	BrCC(Br)C1CCC(Br)C(Br)C1	qsar_ready_smiles	0	0	0	1	1	1	1	0	1	1	1	1	0	1	1	1	1	0	0	0	1	polyhalogenated alicycles	OFR	11	high	1	0	0.878587
DTXSID5049817	3486359	3486-35-9	Zinc carbonate	CO3Zn	OC(O)=O	qsar_ready_smiles	0	0	0	0	0	0	0	1	0	0	0	0	0	0	0	0	0	0	0	1	1			1	low	0	0	0.271332
DTXSID5063071	3555111	3555-11-1	Allyl pentabromophenyl ether	C9H5Br5O	BrC1=C(Br)C(Br)=C(OCC=C)C(Br)=C1Br	qsar_ready_smiles	0	0	0	1	0	1	1	0	1	1	0	0	0	1	1	0	1	0	0	0	1	polyhalogenated phenol-aliphatic ether	OFR	7	high	1	0	0.963545
DTXSID4063290	4090511	4090-51-1	1,3,2-Dioxaphosphorinane, 2,2'-oxybis[5,5-dimethyl-, 2,2'-disulfide	C10H20O5P2S2	CC1(C)COP(=S)(OP2(=S)OCC(C)(C)CO2)OC1	qsar_ready_smiles	0	0	0	0	0	1	0	0	1	0	0	0	0	0	1	0	0	1	0	0	1			3	med	0	0	0.624905
DTXSID4038922	4162452	4162-45-2	Tetrabromobisphenol A bis(2-hydroxyethyl) ether	C19H20Br4O4	CC(C)(C1=CC(Br)=C(OCCO)C(Br)=C1)C1=CC(Br)=C(OCCO)C(Br)=C1	qsar_ready_smiles	0	0	0	1	1	1	1	1	1	1	0	1	1	1	1	0	1	0	0	0	1	polyhalogenated bisphenol aliphatics and functionalized	OFR	11	high	1	0	0.785144
DTXSID20863371	4351706	4351-70-6	Phosphonic acid, P-[1-[[(2-chloroethoxy)(2-chloroethyl)phosphinyl]oxy]ethyl]-, 1-[bis(2-chloroethoxy)phosphinyl]ethyl 2-chloroethyl ester	C14H28Cl5O9P3	CC(OP(=O)(OCCCl)C(C)OP(=O)(CCCl)OCCCl)P(=O)(OCCCl)OCCCl	qsar_ready_smiles	0	0	0	1	0	0	0	1	1	0	0	0	0	0	0	0	1	0	0	0	1	polyhalogenated organophosphates		3	med	1	0	0.943584
DTXSID60199202	5118796	5118-79-6	s-Triazine, 2,2'-O-phenylene-bis(4,6-diamino-	C12H12N10	NC1=NC(=NC(N)=N1)C1=CC=CC=C1C1=NC(N)=NC(N)=N1	qsar_ready_smiles	0	0	0	0	0	0	0	0	0	0	0	0	0	0	1	0	0	1	0	0	1			1	low	0	0	0.737754
DTXSID7040154	5205936	5205-93-6	N-(3-Dimethylaminopropyl)methacrylamide	C9H18N2O	CN(C)CCCNC(=O)C(C)=C	qsar_ready_smiles	0	0	0	0	0	0	0	1	0	0	0	0	0	0	0	0	0	0	0	0	0		Group of chemists think this is unlikely a flame retardant, reactive/intermediate.	1	low	0	0	0.0614914
DTXSID501017085	5324129	5324-12-9	2,3-Dibromopropylphosphate	C3H7Br2O4P	OP(O)(=O)OCC(Br)CBr	qsar_ready_smiles	0	0	0	0	0	1	0	0	0	0	0	0	0	0	0	0	1	0	0	0	1	polyhalogenated organophosphates		1	low	0	0	0.972532
DTXSID70275889	5412259	5412-25-9	Bis(2,3-dibromopropyl) hydrogen phosphate	C6H11Br4O4P	OP(=O)(OCC(Br)CBr)OCC(Br)CBr	qsar_ready_smiles	0	0	0	1	0	1	0	0	1	0	0	0	0	0	1	0	1	0	0	0	1	polyhalogenated organophosphates		4	high	1	0	0.972532
DTXSID3030056	5436431	5436-43-1	2,2',4,4'-Tetrabromodiphenyl ether	C12H6Br4O	BrC1=CC(Br)=C(OC2=CC=C(Br)C=C2Br)C=C1	qsar_ready_smiles	0	0	0	1	0	1	0	0	0	1	1	1	0	0	1	0	1	0	0	0	1	polyhalogenated diphenyl ethers		6	high	1	0	0.918378
DTXSID90884159	5445170	5445-17-0	Propanoic acid, 2-bromo-, methyl ester	C4H7BrO2	COC(=O)C(C)Br	qsar_ready_smiles	0	0	0	1	0	0	0	1	0	0	0	0	0	0	0	0	1	0	0	0	1	polyhalogenated aliphatic carboxylate		2	med	1	0	0.598319
DTXSID9052715	5445192	5445-19-2	Methyl 2-bromohexanoate	C7H13BrO2	CCCCC(Br)C(=O)OC	qsar_ready_smiles	0	0	0	1	0	0	0	1	0	0	0	0	0	0	0	0	0	0	0	0	0		Group of chemists think this is unlikely a flame retardant. Several data sources report as intermediate only, highly reactive.	2	med	1	0	0.615914
DTXSID60974814	5940692	5940-69-2	Tetrakis(hydroxymethyl)phosphanium bromide	C4H12BrO4P	OCP(CO)(CO)CO	qsar_ready_smiles	0	1	0	0	0	0	0	0	1	0	0	0	0	0	0	0	0	1	0	0	1		This contains a Bromine ion but not a carbon-halogen bond so is not considered an OFR	1	low	0	0	0.750605
DTXSID8052720	5945335	5945-33-5	Phosphoric acid, P,P'-[(1-methylethylidene)di-4,1-phenylene] P,P,P',P'-tetraphenyl ester	C39H34O8P2	CC(C)(C1=CC=C(OP(=O)(OC2=CC=CC=C2)OC2=CC=CC=C2)C=C1)C1=CC=C(OP(=O)(OC2=CC=CC=C2)OC2=CC=CC=C2)C=C1	qsar_ready_smiles	0	0	0	0	0	1	1	0	0	0	1	0	0	1	1	0	0	1	0	0	1			5	high	0	0	0.933546
DTXSID3027615	6145739	6145-73-9	Tris(2-chloropropyl) phosphate	C9H18Cl3O4P	CC(Cl)COP(=O)(OCC(C)Cl)OCC(C)Cl	qsar_ready_smiles	0	0	0	1	1	1	0	1	1	0	0	0	1	0	1	1	1	0	0	0	1	polyhalogenated organophosphates		8	high	1	0	0.902273
DTXSID20210629	6161815	6161-81-5	Dioctyl phenyl phosphate	C22H39O4P	CCCCCCCCOP(=O)(OCCCCCCCC)OC1=CC=CC=C1	qsar_ready_smiles	0	0	0	0	0	0	0	0	0	0	0	0	0	0	1	0	0	1	0	0	1			1	low	0	0	0.934027
DTXSID8027618	6294344	6294-34-4	Bis(2-chloroethyl) 2-chloroethylphosphonate	C6H12Cl3O3P	ClCCOP(=O)(CCCl)OCCCl	qsar_ready_smiles	0	0	0	1	0	0	0	1	0	0	0	0	0	0	0	0	1	0	0	0	1	polyhalogenated organophosphates		2	med	1	0	0.943584
DTXSID80212649	6326723	6326-72-3	Trimethylphosphoramide	C3H12N3OP	CNP(=O)(NC)NC	qsar_ready_smiles	0	0	0	0	0	0	0	0	1	0	0	0	0	0	0	0	0	1	0	0	1			1	low	0	0	0.784825
DTXSID80863938	6749731	6749-73-1	Tris(1,3-dichloropropan-2-yl) phosphite	C9H15Cl6O3P	ClCC(CCl)OP(OC(CCl)CCl)OC(CCl)CCl	qsar_ready_smiles	0	0	0	1	0	0	0	0	1	0	0	0	0	0	0	0	1	0	0	0	1	polyhalogenated organophosphates		2	med	1	0	0.906851
DTXSID9074773	6876002	6876-00-2	PBDE 002	C12H9BrO	BrC1=CC=CC(OC2=CC=CC=C2)=C1	qsar_ready_smiles	0	0	1	0	0	1	0	0	0	0	0	0	0	0	0	0	1	0	0	0	1	polyhalogenated diphenyl ethers		1	low	0	0	0.837874
DTXSID90534622	6903635	6903-63-5	1,1'-Oxybis(3-bromobenzene)	C12H8Br2O	BrC1=CC=CC(OC2=CC(Br)=CC=C2)=C1	qsar_ready_smiles	0	0	1	0	0	1	0	0	0	0	0	0	0	0	0	0	1	0	0	0	1	polyhalogenated diphenyl ethers		1	low	0	0	0.803574
DTXSID7073486	7025061	7025-06-1	Benzene, bromophenoxy-	C12H9BrO	BrC1=C(OC2=CC=CC=C2)C=CC=C1	qsar_ready_smiles	0	0	0	0	0	1	0	0	0	0	0	0	0	0	1	0	1	0	0	0	1	polyhalogenated diphenyl ethers		2	med	0	0	0.876549
DTXSID90724142	7046642	7046-64-2	Tris(2,4,6-tribromophenyl) phosphate	C18H6Br9O4P	BrC1=CC(Br)=C(OP(=O)(OC2=C(Br)C=C(Br)C=C2Br)OC2=C(Br)C=C(Br)C=C2Br)C(Br)=C1	qsar_ready_smiles	0	0	0	1	0	0	0	0	1	0	0	0	0	0	0	0	1	0	0	0	1	polyhalogenated organophosphates		2	med	1	0	0.948714
DTXSID9064639	7347195	7347-19-5	Tribromophenoxyethyl acrylate	C11H9Br3O3	BrC1=CC(Br)=C(OCCOC(=O)C=C)C(Br)=C1	qsar_ready_smiles	0	0	0	1	0	0	0	0	0	0	0	0	0	0	0	0	1	0	0	0	1	polyhalogenated phenol-aliphatic ether		1	low	0	0	0.832831
DTXSID30864056	7415863	7415-86-3	1,2-Benzenedicarboxylic acid, 1,2-bis(2,3-dibromopropyl) ester	C14H14Br4O4	BrCC(Br)COC(=O)C1=CC=CC=C1C(=O)OCC(Br)CBr	qsar_ready_smiles	0	0	0	1	1	0	0	0	1	0	0	0	1	0	0	0	1	0	0	0	1	polyhalogenated phthalates/benzoates/imides		4	high	1	0	0.883906
DTXSID8073471	7436900	7436-90-0	Benzene, dibromoethenyl-	C8H6Br2	BrC(Br)=CC1=CC=CC=C1	qsar_ready_smiles	0	0	0	1	0	1	1	0	0	0	0	0	0	0	1	0	1	0	0	0	1	polyhalogenated benzene aliphatics and functionalized		4	high	1	0	0.431985
DTXSID9050484	7440702	7440-70-2	Calcium	Ca	[Ca]	canonical_smiles	0	0	0	0	0	0	0	0	0	0	0	0	0	0	0	1	0	0	0	0	0		Calcium on its own is highly reactive with water and air. Physical-chemical property flag. Other inorganic flame retardants contain calcium but calcium on its own is not a flame retardant	1	low	0	0	0.721658
DTXSID8042476	7550450	7550-45-0	Titanium tetrachloride	Cl4Ti	Cl[Ti](Cl)(Cl)Cl	canonical_smiles	0	0	0	0	0	0	0	0	0	0	0	0	0	0	0	1	0	0	0	1	1			1	low	0	0	0.787742
DTXSID1064746	7580372	7580-37-2	Phosphonium, tetrakis(hydroxymethyl)-, acetate (salt)	C6H15O6P	OCP(CO)(CO)CO	qsar_ready_smiles	0	0	0	0	0	0	0	0	1	0	0	0	0	0	0	1	0	1	0	0	1			2	med	0	0	0.750605
DTXSID1029677	7631869	7631-86-9	Silica		O=[Si]=O	canonical_smiles	0	0	0	0	1	1	0	0	0	0	0	0	0	0	0	0	0	1	0	0	1			2	med	0	0	0.732893
DTXSID8034902	7631905	7631-90-5	Sodium bisulfite	HNaO3S	[Na+].OS([O-])=O	canonical_smiles	0	0	0	0	0	0	0	1	1	0	0	0	0	0	0	0	0	0	0	0	0		Appears on Table A7.1 “many of these substances appear not to be flame retardants, but substances that are fire fighting agents, chemical intermediates or used for other purposes” If a chemical appeared only on this list and no other data source it was removed as a flame retardant. This also appeared on ICPS as used in past. PUBCHEM says this is a very commonly used chemical with many other non-f…	2	med	0	0	0.73866
DTXSID2035013	7646857	7646-85-7	Zinc chloride	Cl2Zn	[Cl-].[Cl-].[Zn++]	canonical_smiles	0	0	0	0	0	0	0	0	1	0	0	0	0	0	0	0	0	0	0	1	1			1	low	0	0	0.735554
DTXSID5029689	7722761	7722-76-1	Ammonium phosphate	H6NO4P	[NH4+].OP(O)([O-])=O	canonical_smiles	0	0	0	0	0	1	0	0	0	0	1	0	0	0	1	0	0	0	0	1	1			3	med	0	0	0.896674
DTXSID1024382	7723140	7723-14-0	Phosphorus	P	[P]	canonical_smiles	0	0	0	0	1	1	0	0	1	0	0	0	0	0	0	1	0	0	0	1	1		Chemists note phosphorus exists as red, white, violet, black. Red phosphorus is most likely to be flame retardant while others are not.	4	high	0	0	0.490539
DTXSID0050471	7727437	7727-43-7	Barium sulfate	BaO4S	[Ba++].[O-]S([O-])(=O)=O	canonical_smiles	0	0	0	0	0	1	0	0	0	0	0	0	0	0	0	0	0	0	0	1	1			1	low	0	0	0.77546
DTXSID6064793	7760501	7760-50-1	Magnesium carbonate hydroxide (Mg5(CO3)​4(OH)​2)	C4H2Mg5O14	O[Mg]OC(=O)O[Mg]OC(=O)O[Mg]OC(=O)O[Mg]OC(=O)O[Mg]O	canonical_smiles	0	0	0	0	0	0	0	1	1	0	0	0	0	0	0	0	0	0	0	1	1			2	med	0	0	0.676985
DTXSID5023875	7773060	7773-06-0	Ammonium sulfamate	H6N2O3S	[NH4+].NS([O-])(=O)=O	canonical_smiles	0	0	0	0	0	1	0	1	1	0	0	0	0	0	0	1	0	0	0	1	1		inorganic	4	high	0	0	0.575234
DTXSID2049634	7782425	7782-42-5	Graphite		[C]	pubchem_smiles	0	0	0	0	0	1	0	0	0	0	0	0	1	0	0	0	0	1	0	0	1			2	med	0	0	0.490539
DTXSID1029704	7783202	7783-20-2	Ammonium sulfate	H8N2O4S	[NH4+].[NH4+].[O-]S([O-])(=O)=O	canonical_smiles	0	0	0	0	0	1	0	1	1	0	0	0	0	0	0	0	0	0	0	1	1		inorganic	3	med	0	0	0.74215
DTXSID6029705	7783280	7783-28-0	Diammonium hydrogen phosphate	H9N2O4P	[NH4+].[NH4+].OP([O-])([O-])=O	canonical_smiles	0	0	0	0	0	0	0	1	1	0	0	0	0	0	0	0	0	0	0	1	1			2	med	0	0	0.896674
DTXSID20872802	7784227	7784-22-7	Aluminum hypophosphite	AlH6O6P3	[Al+3].[H]P([H])([O-])=O.[H]P([H])([O-])=O.[H]P([H])([O-])=O	canonical_smiles	0	0	0	0	0	1	0	0	0	0	0	0	0	0	0	0	0	0	0	1	1			1	low	0	0	0.841656
DTXSID5034690	7786303	7786-30-3	Magnesium chloride	Cl2Mg	[Mg++].[Cl-].[Cl-]	canonical_smiles	0	0	0	0	0	0	0	0	1	0	0	0	0	0	0	0	0	0	0	1	1			1	low	0	0	0.721658
DTXSID1052531	7789799	7789-79-9	Calcium phosphinate	CaO4P2	[Ca++].[O-]P=O.[O-]P=O	canonical_smiles	0	0	0	0	0	1	0	0	0	0	1	0	0	0	0	0	0	0	0	1	1			2	med	0	0	0.851631
DTXSID001014486	7789824	7789-82-4	Calcium molybdate(VI)	CaMoO4	[O--].[O--].[O--].[O--].[Ca++].[Mo+6]	canonical_smiles	0	0	0	1	1	0	0	0	0	0	0	0	0	0	0	0	0	0	0	1	1			2	med	0	0	0.875242
DTXSID3051250	9002851	9002-85-1	Polyvinylidene chloride		C=C(Cl)Cl	pubchem_smiles	0	0	0	1	0	0	0	0	0	0	0	0	0	0	0	0	0	1	0	0	1			1	low	0	0	0
DTXSID5025940	9002862	9002-86-2	Polyvinyl chloride				0	0	0	0	0	0	0	0	0	0	0	0	0	0	0	1	0	0	0	0	0		PVC is a material type, not a flame retardant.	1	low	0	0	0
DTXSID601009714	9003081	9003-08-1	1,3,5-Triazine-2,4,6-triamine, polymer with formaldehyde				0	0	0	0	0	0	0	1	0	0	0	0	0	0	0	0	0	0	1	0	1		polymeric	1	low	0	0	0
DTXSID4044161	10025919	10025-91-9	Antimony trichloride	Cl3Sb	Cl[Sb](Cl)Cl	canonical_smiles	0	0	0	0	0	0	0	1	0	0	0	0	0	0	0	0	0	0	0	1	1			1	low	0	0	0.71195
DTXSID1020194	10043353	10043-35-3	Boric acid (H3BO3)	BH3O3	OB(O)O	canonical_smiles	0	0	0	1	0	1	0	0	1	0	0	0	0	0	0	0	0	0	0	1	1			3	med	0	0	0.821072
DTXSID5020235	10043524	10043-52-4	Calcium chloride	CaCl2	[Cl-].[Cl-].[Ca++]	canonical_smiles	0	0	0	0	0	0	0	0	1	0	0	0	0	0	0	0	0	0	0	1	1			1	low	0	0	0.721658
DTXSID7047514	10101414	10101-41-4	Calcium sulfate dihydrate	CaH4O6S	O.O.[Ca++].[O-]S([O-])(=O)=O	canonical_smiles	0	0	0	0	0	0	0	1	0	0	0	0	0	0	0	0	0	0	0	1	1			1	low	0	0	0.77546
DTXSID6050122	10124319	10124-31-9	Phosphoric acid, ammonium salt (1:x)		N.OP(=O)(O)O	pubchem_smiles	0	0	0	0	0	0	0	1	1	0	0	0	0	0	0	0	0	0	0	1	1			2	med	0	0	0.848569
DTXSID20872766	10310380	10310-38-0	Ethylenebis[tris(2-cyanoethyl)phosphonium bromide]	C20H28Br2N6P2	N#CCCP(CCC#N)(CCC#N)CCP(CCC#N)(CCC#N)CCC#N	qsar_ready_smiles	0	1	0	0	0	0	0	1	1	0	0	0	0	0	0	0	0	1	1	0	1		This contains a halogen ion but not a carbon-halogen bond so it is a flame retardant but not an organohalogen flame retardant	2	med	0	0	0.621453
DTXSID80149507	11112100	11112-10-0	Antimonic acid, sodium salt	Na3O4Sb	[Na+].[Na+].[Na+].[O-][Sb]([O-])([O-])=O	canonical_smiles	0	0	0	0	0	0	0	1	0	0	0	0	0	0	0	0	0	0	0	1	1			1	low	0	0	0.918649
DTXSID101014603	11113501	11113-50-1	Crude natural boric acid		B(O)(O)O	pubchem_smiles	0	0	0	0	0	1	0	1	1	0	0	0	0	0	0	0	0	0	0	1	1		inorganic	3	med	0	0	0.821072
DTXSID5051317	12007588	12007-58-8	Diammonium tetraborate	B4H8N2O7	[NH4+].[NH4+].[O-]B1OB2OB([O-])OB(O1)O2	canonical_smiles	0	0	0	0	0	0	0	0	1	0	0	0	0	0	0	0	0	0	0	1	1			1	low	0	0	0.869043
DTXSID60894063	12027064	12027-06-4	Ammonium iodide	H4IN	[NH4+].[I-]	canonical_smiles	0	0	0	0	0	0	0	0	1	0	0	0	0	0	0	0	0	0	0	0	0		Iodide flag, ineffective flame retardant.	1	low	0	0	0.69292
DTXSID50872597	12027962	12027-96-2	Tin zinc hydroxide (ZnSn(OH)6)	H6O6SnZn	[H].[H].[H].[H].[H].[H].[Zn++].[O-][Sn+4]([O-])([O-])([O-])([O-])[O-]	canonical_smiles	0	0	0	0	0	1	0	0	1	0	0	0	0	0	1	1	0	0	0	1	1		inorganic	4	high	0	0	0.899398
DTXSID5065196	12036372	12036-37-2	Tin zinc oxide (SnZnO3)	O3SnZn	[Zn++].[O-][Sn]([O-])=O	canonical_smiles	0	0	0	0	0	1	0	0	1	0	0	0	0	0	1	1	0	0	0	1	1		inorganic	4	high	0	0	0.920169
DTXSID1091555	12040583	12040-58-3	Calcium borate		B([O-])([O-])[O-].B([O-])([O-])[O-].[Ca+2].[Ca+2].[Ca+2]	pubchem_smiles	0	0	0	0	0	0	0	0	0	0	0	0	0	0	0	1	0	0	0	1	1			1	low	0	0	0.897309
DTXSID50858856	12058661	12058-66-1	Disodium stannate	Na2O3Sn	[Na+].[Na+].O=[Sn--](=O)=O	canonical_smiles	0	0	0	0	0	0	0	0	1	0	0	0	0	0	0	0	0	0	0	1	1			1	low	0	0	0.902079
DTXSID10923559	12079582	12079-58-2	Brominemethane (1/16)	C16H64Br2	C.C.C.C.C.C.C.C.C.C.C.C.C.C.C.C.BrBr	canonical_smiles	0	0	0	0	0	0	0	0	0	0	0	0	0	0	1	0	0	0	0	1	1			1	low	0	0	0.48624
DTXSID8035681	12124979	12124-97-9	Ammonium bromide	BrH4N	[NH4+].[Br-]	canonical_smiles	0	0	0	0	0	1	0	1	1	0	0	0	0	0	1	0	0	0	0	1	1			4	high	0	0	0.69292
DTXSID0020078	12125029	12125-02-9	Ammonium chloride	ClH4N	[NH4+].[Cl-]	canonical_smiles	0	0	0	0	0	0	0	1	1	0	0	0	0	0	1	0	0	0	0	1	1			3	med	0	0	0.69292
DTXSID7034389	12179043	12179-04-3	Boron sodium oxide pentahydrate	B4H10Na2O12	O.O.O.O.O.[Na+].[Na+].[O-]B(OB=O)OB([O-])OB=O	canonical_smiles	0	0	0	0	0	1	0	0	0	0	0	0	0	0	0	0	0	0	0	1	1			1	low	0	0	0.932614
DTXSID001018214	12251535	12251-53-5	Aluminium sodium tetrahydroxide	AlH4NaO4	[OH-].[OH-].[OH-].[OH-].[Na+].[Al+3]	canonical_smiles	0	0	0	0	0	1	0	0	0	0	1	0	0	0	0	0	0	0	0	1	1			2	med	0	0	0.820936
DTXSID1034391	12280034	12280-03-4	Disodium octaborate tetrahydrate	B8H8Na2O17	O.O.O.O.[Na+].[Na+].[O-]B1OB([O-])OB2OB(OB=O)OB(OB=O)OB(O1)O2	canonical_smiles	0	0	0	0	0	1	0	1	0	0	0	0	0	0	0	0	0	0	0	1	1			2	med	0	0	0.932614
DTXSID40872768	12411642	12411-64-2	Tetraammonium octamolybdate	H16Mo8N4O26	[NH4+].[NH4+].[NH4+].[NH4+].O=[Mo++]123(=O)[O--][Mo++]45(=O)(=O)[O--]6[Mo++]78(=O)(=O)[O--][Mo++]9%10(=O)(=O)[O--][Mo++]%11%12(=O)(=O)[O--]%13[Mo++]%14(=O)(=O)([O--]1)[O--]%11[Mo+4]1(=O)([O--]9)([O--]47)[O--]25%14[Mo+4]6%13(=O)([O--]3)[O--]8%10%121	canonical_smiles	0	0	0	0	0	1	0	0	1	0	0	0	0	0	1	0	0	0	0	1	1		inorganic	3	med	0	0	0.843887
DTXSID0058300	12767907	12767-90-7	Zinc borate (ZnO 3 2B2O3)	B6O11Zn2	[B+3].[B+3].[B+3].[B+3].[B+3].[B+3].[O--].[O--].[O--].[O--].[O--].[O--].[O--].[O--].[O--].[O-][Zn+].[O-][Zn+]	canonical_smiles	0	0	0	0	0	1	0	0	0	0	1	0	0	0	0	1	0	0	0	1	1			3	med	0	0	0.829084
DTXSID40925980	12777876	12777-87-6	Sulfuric acid--methane (1/1)	CH6O4S	C.OS(O)(=O)=O	canonical_smiles	0	0	0	0	1	0	0	0	0	0	0	0	1	0	0	0	0	0	1	0	1		mixture	2	med	0	0	0.554497
DTXSID10872553	13308515	13308-51-5	Boron phosphate (B(PO4))	BO4P	O=P12OB(O1)O2	canonical_smiles	0	0	0	0	0	1	0	0	0	0	1	0	0	0	0	0	0	0	0	1	1			2	med	0	0	0.938474
DTXSID4021420	13472452	13472-45-2	Sodium tungsten oxide (Na2WO4)		[O--].[O--].[O--].[O--].[Na+].[Na+].[W+6]	canonical_smiles	0	0	0	0	0	0	0	1	1	0	0	0	0	0	0	0	0	0	0	1	1			2	med	0	0	0.875242
DTXSID70928904	13518939	13518-93-9	Diphosphoric acid--1,3,5-triazinane-2,4,6-triimine (1/2)	C6H16N12O7P2	NC1=NC(N)=NC(N)=N1	qsar_ready_smiles	0	1	0	0	0	0	0	1	0	0	0	0	0	0	0	0	0	1	0	0	1			1	low	0	0	0.739152
DTXSID2094005	13530502	13530-50-2	Aluminum phosphate (Al(H2PO4)3)	AlH6O12P3	[Al+3].OP(O)([O-])=O.OP(O)([O-])=O.OP(O)([O-])=O	canonical_smiles	0	0	0	0	1	0	0	0	0	0	0	0	0	0	0	0	0	0	0	1	1			1	low	0	0	0.907775
DTXSID7027750	13560899	13560-89-9	Dechlorane Plus	C18H12Cl12	ClC1=C(Cl)C2(Cl)C3CCC4C(CCC3C1(Cl)C2(Cl)Cl)C1(Cl)C(Cl)=C(Cl)C4(Cl)C1(Cl)Cl	qsar_ready_smiles	0	0	0	1	1	1	0	1	1	0	1	1	1	1	1	1	1	0	0	0	1	polyhalogenated carbocycles	OFR	11	high	1	0	0.901547
DTXSID70675901	13560902	13560-90-2	4,5,6,7,13,14,15,16,19,19,20,20Dodecachloroheptacyclo[9.6.1.1~4,7~.1~13,16~.0~2,10~.0~3,8~.0~12,17~]icosa5,14diene (nonpreferred name)	C20H12Cl12	[H]C12CC([H])(C3C1CC1C3C3(Cl)C(Cl)=C(Cl)C1(Cl)C3(Cl)Cl)C1C2C2(Cl)C(Cl)=C(Cl)C1(Cl)C2(Cl)Cl	qsar_ready_smiles	0	0	0	0	0	0	0	0	0	0	0	0	0	0	1	0	1	0	0	0	1	polyhalogenated carbocycles		1	low	0	0	0.861758
DTXSID40929084	13560913	13560-91-3	1,2,3,4,5,6,7,8,10,10,11,11-Dodecachloro-4,4a,4b,5,8,8a,9,9a-octahydro-1H-1,4:5,8-dimethanofluorene	C15H6Cl12	ClC1=C(Cl)C2(Cl)C3C(CC4C3C3(Cl)C(Cl)=C(Cl)C4(Cl)C3(Cl)Cl)C1(Cl)C2(Cl)Cl	qsar_ready_smiles	0	0	0	0	0	0	0	0	0	0	0	0	0	0	1	0	1	0	0	0	1	polyhalogenated carbocycles		1	low	0	0	0.901547
DTXSID30108225	13560924	13560-92-4	1,4:5,8:9,10-Trimethanoanthracene, 1,2,3,4,5,6,7,8,12,12,13,13-dodecachloro-1,4,4a,5,8,8a,9,9a,10,10a-decahydro-		C1C2(C3C(C1(C(=C2Cl)Cl)Cl)C4C5C(C3C4(Cl)Cl)C6(C(=C(C5(C6(Cl)Cl)Cl)Cl)Cl)Cl)Cl	pubchem_smiles	0	0	0	1	0	1	0	0	0	0	1	0	0	1	1	0	1	0	0	0	1	polyhalogenated carbocycles		5	high	1	0	0.861758
DTXSID9065572	13654096	13654-09-6	1,1'-Biphenyl, 2,2',3,3',4,4',5,5',6,6'-decabromo-	C12Br10	BrC1=C(Br)C(Br)=C(C(Br)=C1Br)C1=C(Br)C(Br)=C(Br)C(Br)=C1Br	qsar_ready_smiles	0	0	0	1	0	1	1	0	1	0	0	0	1	0	1	1	1	0	0	0	1	polyhalogenated benzenes		7	high	1	0	0.969686
DTXSID5026259	13674845	13674-84-5	Tris(2-chloroisopropyl)phosphate	C9H18Cl3O4P	CC(CCl)OP(=O)(OC(C)CCl)OC(C)CCl	qsar_ready_smiles	0	0	0	1	1	1	1	1	1	0	1	1	1	1	1	1	1	0	0	0	1	polyhalogenated organophosphates	OFR	12	high	1	0	0.949723
DTXSID9026261	13674878	13674-87-8	Tris(1,3-dichloro-2-propyl) phosphate	C9H15Cl6O4P	ClCC(CCl)OP(=O)(OC(CCl)CCl)OC(CCl)CCl	qsar_ready_smiles	0	0	0	1	1	1	1	1	1	0	1	1	1	1	1	1	1	0	0	0	1	polyhalogenated organophosphates	OFR	12	high	1	0	0.966834
DTXSID1034347	13701592	13701-59-2	Barium metaborate	B2BaO4	[Ba++].[O-]B=O.[O-]B=O	canonical_smiles	0	0	0	0	0	0	0	1	1	0	0	0	0	0	0	1	0	0	0	1	1		inorganic	3	med	0	0	0.932614
DTXSID40160258	13765952	13765-95-2	Zirconium phosphate	O16P4Zr3	[Zr+4].[Zr+4].[Zr+4].[O-]P([O-])([O-])=O.[O-]P([O-])([O-])=O.[O-]P([O-])([O-])=O.[O-]P([O-])([O-])=O	canonical_smiles	0	0	0	0	0	1	0	0	0	0	0	0	0	0	0	0	0	0	0	1	1			1	low	0	0	0.913039
DTXSID10893960	13767323	13767-32-3	Zinc molybdate(VI) (ZnMoO4)	MoO4Zn	[O--].[O--].[O--].[O--].[Zn++].[Mo+6]	canonical_smiles	0	0	0	1	1	0	0	0	0	0	0	0	0	0	0	0	0	0	0	1	1			2	med	0	0	0.80702
DTXSID8043781	13810838	13810-83-8	Tetrabromophthalic acid	C8H2Br4O4	OC(=O)C1=C(Br)C(Br)=C(Br)C(Br)=C1C(O)=O	qsar_ready_smiles	0	0	0	0	0	1	0	0	0	0	0	0	0	0	1	1	1	0	0	0	1	polyhalogenated phthalates/benzoates/imides		3	med	0	0	0.82157
DTXSID8065660	13826830	13826-83-0	Ammonium fluoroborate	BF4H4N	[NH4+].F[B-](F)(F)F	canonical_smiles	0	0	0	0	0	0	0	1	0	0	0	0	0	0	0	0	0	0	0	1	1		Group of chemists found additional evidence that suggests this chemical could be used as flame retardant.	1	low	0	0	0.759155
DTXSID7039672	14265442	14265-44-2	Phosphate	O4P	[O-]P([O-])([O-])=O	canonical_smiles	0	0	0	0	0	1	0	0	0	0	0	0	0	0	0	0	0	1	0	0	1		PUBCHEM has patents available that says this could be used as an FR. Naturally occuring common chemical.	1	low	0	0	0.873993
DTXSID60162597	14400943	14400-94-3	2,3,4,6-Tetrabromophenol	C6H2Br4O	OC1=C(Br)C(Br)=C(Br)C=C1Br	qsar_ready_smiles	0	0	0	0	0	0	0	0	0	0	0	0	0	0	1	0	1	0	0	0	1	polyhalogenated phenol derivatives		1	low	0	1	0.928029
DTXSID30461246	14657648	14657-64-8	3-[Hydroxy(phenyl)phosphoryl]propanoic acid	C9H11O4P	OC(=O)CCP(O)(=O)C1=CC=CC=C1	qsar_ready_smiles	0	0	0	0	0	1	0	0	0	0	1	0	0	0	0	0	0	1	0	0	1			2	med	0	0	0.777774
DTXSID8065824	14852176	14852-17-6	1,2-Ethanediamine, phosphate		C(CN)N.OP(=O)(O)O	pubchem_smiles	0	0	0	0	1	1	0	1	0	0	0	0	0	0	0	0	0	1	0	0	1		non-halognated organic	3	med	0	0	0.747705
DTXSID50931491	14925394	14925-39-4	2-Bromopropenal	C3H3BrO	BrC(=C)C=O	qsar_ready_smiles	0	0	0	0	0	1	0	0	0	0	0	0	0	0	0	0	0	0	0	0	0		Physical-chemical property flag. VP>10 and logKoW<1, may be a chemical intermediate	1	low	0	0	0.141603
DTXSID00164338	14957654	14957-65-4	4,4',6,6'Tetrabromo2,2'biphenyldiol	C12H6Br4O2	OC1=C(C(Br)=CC(Br)=C1)C1=C(O)C=C(Br)C=C1Br	qsar_ready_smiles	0	0	0	0	0	0	0	0	0	0	0	0	0	0	1	0	1	0	0	0	1	polyhalogenated benzenes		1	low	0	0	0.851099
DTXSID60872780	15432856	15432-85-6	Sodium antimonate	NaO3Sb	[Na+].O=[Sb-](=O)=O	canonical_smiles	0	0	0	1	0	0	0	1	1	0	0	0	0	0	0	1	0	0	0	1	1		inorganic	4	high	0	0	0.879666
DTXSID7065912	15541603	15541-60-3	Diphosphoric acid, compd. with 1,3,5-triazine-2,4,6-triamine (1:?)		C1(=NC(=NC(=N1)N)N)N.OP(=O)(O)OP(=O)(O)O	pubchem_smiles	0	0	0	0	1	1	0	0	0	0	0	0	0	0	1	0	0	1	0	0	1			3	med	0	0	0.91635
DTXSID20872781	15652650	15652-65-0	Tetrakis(hydroxymethyl)phosphonium tetraphenylborate-tetraacetate	C36H40BO8P	CC(=O)OC[P+](COC(C)=O)(COC(C)=O)COC(C)=O.C1=CC=C(C=C1)[B-](C1=CC=CC=C1)(C1=CC=CC=C1)C1=CC=CC=C1	canonical_smiles	0	0	0	0	0	0	0	0	1	0	0	0	0	0	0	0	0	1	0	0	1			1	low	0	0	0.846023
DTXSID6051770	16368971	16368-97-1	Bis(2ethylhexyl) phenyl phosphate	C22H39O4P	CCCCC(CC)COP(=O)(OCC(CC)CCCC)OC1=CC=CC=C1	qsar_ready_smiles	0	0	0	0	0	0	0	0	0	0	0	0	0	0	1	0	0	1	0	0	1			1	low	0	0	0.940754
DTXSID0075108	16400503	16400-50-3	1,1'-Biphenyl, 3,3',5,5'-tetrabromo-	C12H6Br4	BrC1=CC(=CC(Br)=C1)C1=CC(Br)=CC(Br)=C1	qsar_ready_smiles	0	0	0	1	0	1	0	0	0	1	0	0	0	0	1	0	1	0	0	0	1	polyhalogenated benzenes		4	high	1	0	0.806189
DTXSID7029740	16919270	16919-27-0	Dipotassium hexafluorotitanate	F6K2Ti	[K+].[K+].F[Ti--](F)(F)(F)(F)F	canonical_smiles	0	0	0	0	0	0	0	1	1	0	0	0	0	0	0	1	0	0	0	1	1			3	med	0	0	0.869486
DTXSID00893979	16923958	16923-95-8	Dipotassium hexafluorozirconate(2-)	F6K2Zr	[K+].[K+].[F-][Zr+4]([F-])([F-])([F-])([F-])[F-]	canonical_smiles	0	0	0	0	0	0	0	1	1	0	0	0	0	0	0	1	0	0	0	1	1		inorganic	3	med	0	0	0.839256
DTXSID20872786	18300044	18300-04-4	1,2-Dibromo-4,5,6,7,8,8-hexachloro-2,3,3a,4,7,7a-hexahydro-4,7-methano-1H-indene	C10H6Br2Cl6	ClC1=C(Cl)C2(Cl)C3C(Br)C(Br)CC3C1(Cl)C2(Cl)Cl	qsar_ready_smiles	0	0	0	1	0	0	0	0	1	0	0	0	0	0	0	0	1	0	0	0	1	polyhalogenated carbocycles		2	med	1	0	0.927814
DTXSID0066406	18755436	18755-43-6	Dimethyl propylphosphonate	C5H13O3P	CCCP(=O)(OC)OC	qsar_ready_smiles	0	0	0	0	1	1	0	1	0	0	1	0	0	0	0	0	0	1	0	0	1			4	high	0	0	0.914668
DTXSID0058691	19186971	19186-97-1	Tris(tribromoneopentyl)phosphate	C15H24Br9O4P	BrCC(CBr)(CBr)COP(=O)(OCC(CBr)(CBr)CBr)OCC(CBr)(CBr)CBr	qsar_ready_smiles	0	0	0	1	1	1	1	1	1	1	1	0	0	1	1	0	1	0	0	0	1	polyhalogenated organophosphates	OFR	10	high	1	0	0.949822
DTXSID401017113	19569212	19569-21-2	Huntite	C4CaMg3O12	OC(O)=O	qsar_ready_smiles	0	0	0	0	0	0	0	1	1	0	0	0	0	0	1	0	0	0	0	1	1			3	med	0	0	0.271332
DTXSID7024950	19660163	19660-16-3	2,3-Dibromopropyl acrylate	C6H8Br2O2	BrCC(Br)COC(=O)C=C	qsar_ready_smiles	0	0	0	1	0	0	0	0	1	0	0	0	0	0	0	0	1	0	0	0	1	polyhalogenated aliphatic carboxylate		2	med	1	0	0.905005
DTXSID9040215	20120336	20120-33-6	Dimethyl (3-((hydroxymethyl)amino)-3-oxopropyl)phosphonate	C6H14NO5P	COP(=O)(CCC(=O)NCO)OC	qsar_ready_smiles	0	0	0	1	1	0	0	1	1	0	0	0	0	0	0	0	0	1	0	0	1			4	high	0	0	0.761992
DTXSID80872787	20208951	20208-95-1	1,3,5-Triazine-2,4,6-triamine monophosphate	C3H9N6O4P	NC1=NC(N)=NC(N)=N1	qsar_ready_smiles	0	0	0	0	0	0	0	0	0	0	1	0	0	0	0	0	0	1	0	0	1			1	low	0	0	0.739152
DTXSID40864926	20217010	20217-01-0	2,4-Dibromophenyl glycidyl ether	C9H8Br2O2	BrC1=CC(Br)=C(OCC2CO2)C=C1	qsar_ready_smiles	0	0	0	1	0	0	0	0	1	0	0	0	0	0	0	0	1	0	0	0	1	polyhalogenated phenol-aliphatic ether		2	med	1	0	0.757321
DTXSID60864948	20566352	20566-35-2	2-(2-Hydroxyethoxy)ethyl 2-hydroxypropyl 3,4,5,6-tetrabromophthalate	C15H16Br4O7	CC(O)COC(=O)C1=C(Br)C(Br)=C(Br)C(Br)=C1C(=O)OCCOCCO	qsar_ready_smiles	0	0	0	1	1	1	1	1	1	1	1	0	1	1	1	0	1	0	0	0	1	polyhalogenated phthalates/benzoates/imides	OFR	11	high	1	0	0.409062
DTXSID2036405	21645512	21645-51-2	Aluminum hydroxide	AlH3O3	[OH-].[OH-].[OH-].[Al+3]	canonical_smiles	0	0	0	1	1	1	1	1	1	0	1	0	1	0	1	1	0	0	0	1	1		inorganic	10	high	0	0	0.702303
DTXSID3032129	21850442	21850-44-2	Tetrabromobisphenol A-bis(2,3-dibromopropyl ether)	C21H20Br8O2	CC(C)(C1=CC(Br)=C(OCC(Br)CBr)C(Br)=C1)C1=CC(Br)=C(OCC(Br)CBr)C(Br)=C1	qsar_ready_smiles	0	0	0	1	1	1	1	1	1	1	1	1	0	1	1	1	1	0	0	0	1	polyhalogenated bisphenol aliphatics and functionalized	OFR	12	high	1	0	0.96111
DTXSID9066752	22031170	22031-17-0	Phosphonium, tetrakis(hydroxymethyl)-, phosphate (3:1) (salt)	C12H36O16P4	OCP(CO)(CO)CO	qsar_ready_smiles	0	1	0	0	0	0	0	0	1	0	0	0	0	0	0	1	0	1	0	1	1			2	med	0	0	0.750605
DTXSID8052697	23488382	23488-38-2	2,3,5,6-Tetrabromo-p-xylene	C8H6Br4	CC1=C(Br)C(Br)=C(C)C(Br)=C1Br	qsar_ready_smiles	0	0	0	1	0	1	1	0	1	1	1	0	0	1	1	0	1	0	0	0	1	polyhalogenated benzene aliphatics and functionalized	OFR	8	high	1	0	0.856015
DTXSID70563233	24173077	24173-07-7	1,2,3,4-Tetrabromo-2,3-dimethylbutane	C6H10Br4	CC(Br)(CBr)C(C)(Br)CBr	qsar_ready_smiles	0	0	0	0	0	0	0	0	1	0	0	0	0	0	0	0	1	0	0	0	1	polyhalogenated aliphatic chains		1	low	0	0	0.891654
DTXSID0052679	24623776	24623-77-6	Aluminium hydroxide oxide	C14H7NaO7S	OC1=C(O)C2=C(C=C1S(O)(=O)=O)C(=O)C1=C(C=CC=C1)C2=O	qsar_ready_smiles	0	0	0	0	0	1	0	1	0	0	0	0	0	0	0	0	0	0	0	1	1			2	med	0	0	0.459325
DTXSID3043786	24655843	24655-84-3	Tetrakis(hydroxymethyl)phosphonium	C4H12O4P	OCP(CO)(CO)CO	qsar_ready_smiles	0	0	0	1	0	0	0	0	0	0	0	0	0	0	0	0	0	1	0	0	1			1	low	0	0	0.750605
DTXSID0049814	24937788	24937-78-8	Vinyl acetate ethylene copolymer		CC(=O)OC=C.C=C	pubchem_smiles	0	0	0	0	0	1	0	0	0	0	0	0	0	0	0	0	0	0	1	0	1		polymeric	1	low	0	0	0.492216
DTXSID90179830	25151364	25151-36-4	Phosphonium, tetrakis(hydroxymethyl)-, formate (salt)	C5H13O6P	OCP(CO)(CO)CO	qsar_ready_smiles	0	0	0	0	0	0	0	0	1	0	0	0	0	0	0	0	0	1	0	0	1			1	low	0	0	0.750605
DTXSID9026267	25155231	25155-23-1	Trixylyl phosphate		CC1=CC(=CC(=C1)OP(=O)(OC2=CC(=CC(=C2)C)C)OC3=CC(=CC(=C3)C)C)C	pubchem_smiles	0	0	0	0	0	1	0	0	1	0	0	0	1	0	1	1	0	1	0	0	1		mixture of isomeric xylene phosphates	5	high	0	0	0.876725
DTXSID2029327	25327893	25327-89-3	Tetrabromobisphenol A diallyl ether	C21H20Br4O2	CC(C)(C1=CC(Br)=C(OCC=C)C(Br)=C1)C1=CC(Br)=C(OCC=C)C(Br)=C1	qsar_ready_smiles	0	0	0	1	1	1	1	1	1	1	0	0	1	1	1	1	1	0	0	0	1	polyhalogenated bisphenol aliphatics and functionalized	OFR	11	high	1	0	0.864576
DTXSID90889689	25357793	25357-79-3	1,2-Benzenedicarboxylic acid, 3,4,5,6-tetrabromo-, sodium salt (1:2)	C8Br4Na2O4	OC(=O)C1=C(Br)C(Br)=C(Br)C(Br)=C1C(O)=O	qsar_ready_smiles	1	0	0	0	0	0	0	0	1	0	0	0	0	0	1	0	1	0	0	0	1	polyhalogenated phthalates/benzoates/imides		2	med	0	0	0.82157
DTXSID70180181	25495981	25495-98-1	Cyclodecane, hexabromo	C10H14Br6	BrC1(Br)CCCCCCCC(Br)(Br)C1(Br)Br	qsar_ready_smiles	0	0	0	1	0	0	1	0	0	1	1	0	0	1	1	0	1	0	0	0	1	polyhalogenated alicycles		6	high	1	0	0.786028
DTXSID8025383	25637994	25637-99-4	Hexabromocyclododecane		C1C(CC(CC(CC(CC(CC1Br)Br)Br)Br)Br)Br	pubchem_smiles	0	0	0	1	1	1	1	1	1	0	1	1	1	0	1	1	1	0	0	0	1	polyhalogenated alicycles	OFR	11	high	1	0	0.775045
DTXSID10274134	25653161	25653-16-1	Tris(3,5-xylenyl)phosphate	C24H27O4P	CC1=CC(OP(=O)(OC2=CC(C)=CC(C)=C2)OC2=CC(C)=CC(C)=C2)=CC(C)=C1	qsar_ready_smiles	0	0	0	0	0	1	0	0	0	0	0	0	0	0	1	0	0	1	0	0	1			2	med	0	0	0.876725
DTXSID0058695	25713604	25713-60-4	2,4,6-Tris-(2,4,6-tribromophenoxy)-1,3,5-triazine	C21H6Br9N3O3	BrC1=CC(Br)=C(OC2=NC(OC3=C(Br)C=C(Br)C=C3Br)=NC(OC3=C(Br)C=C(Br)C=C3Br)=N2)C(Br)=C1	qsar_ready_smiles	0	0	0	1	1	1	1	1	1	1	1	0	1	1	1	0	1	0	0	0	1	polyhalogenated triazines	OFR	11	high	1	0	0.910648
DTXSID7027887	26040517	26040-51-7	Bis(2-ethylhexyl) tetrabromophthalate	C24H34Br4O4	CCCCC(CC)COC(=O)C1=C(Br)C(Br)=C(Br)C(Br)=C1C(=O)OCC(CC)CCCC	qsar_ready_smiles	0	0	0	1	1	1	1	1	0	1	1	1	1	1	1	0	1	0	0	0	1	polyhalogenated phthalates/benzoates/imides	OFR	11	high	1	0	0.885827
DTXSID201016652	26248873	26248-87-3	Tris(chloropropyl)phosphate		C(COP(=O)(OCCCCl)OCCCCl)CCl	pubchem_smiles	0	0	0	1	0	1	0	0	0	0	0	0	0	0	1	0	1	0	0	0	1	polyhalogenated organophosphates		3	med	0	0	0.939041
DTXSID70872791	26265087	26265-08-7	Bisphenol A-epichlorohydrin-2,2',6,6'-tetrabromobisphenol A copolymer		CC(C)(C1=CC=C(C=C1)O)C2=CC=C(C=C2)O.CC(C)(C1=CC(=C(C(=C1)Br)O)Br)C2=CC(=C(C(=C2)Br)O)Br.C1C(O1)CCl	pubchem_smiles	1	0	0	0	1	0	0	0	0	0	0	0	1	0	0	0	0	0	1	0	1		polymeric	2	med	0	0	0
DTXSID3024861	26444495	26444-49-5	Cresyl diphenyl phosphate		CC1=CC=C(C=C1)OP(=O)(OC2=CC=CC=C2)OC3=CC=CC=C3	pubchem_smiles	0	0	0	0	1	1	0	1	1	0	1	0	1	0	1	1	0	1	0	0	1		mixture of methylphenyl isomers; ill-defined substance	8	high	0	0	0.913278
DTXSID20894685	26446731	26446-73-1	Phosphoric acid, bis(methylphenyl) phenyl ester		CC1=CC=C(C=C1)OP(=O)(OC2=CC=CC=C2)OC3=CC=CC=C3C	pubchem_smiles	0	0	0	0	1	0	0	0	0	0	0	0	1	0	1	0	0	1	0	0	1			3	med	0	0	0.913278
DTXSID901016689	26604513	26604-51-3	Tris(dichloropropyl) phosphate		CC(C(OP(=O)(OCCC(Cl)Cl)OCC(CCl)Cl)Cl)Cl	pubchem_smiles	0	0	0	0	0	0	0	0	0	0	0	0	0	0	1	1	1	0	0	0	1	polyhalogenated organophosphates		2	med	0	0	0.950446
DTXSID901017087	26657830	26657-83-0	pentabromocyclododecene		C1CCCCC(=C(C(C(CCC1)Br)(Br)Br)Br)Br	pubchem_smiles	0	0	0	0	0	1	0	0	0	0	0	0	0	0	0	0	1	0	0	0	1	polyhalogenated alicycles		1	low	0	0	0.872591
DTXSID5025071	26780961	26780-96-1	1,2-Dihydro-2,2,4-trimethylquinoline, polymer		CC1=CC(NC2=CC=CC=C12)(C)C	pubchem_smiles	0	0	0	0	0	0	0	1	0	0	0	0	0	0	0	0	0	0	0	0	0		group of chemists think this is unlikely a flame retardant. This is an antioxidant, used frequently in combination. Correlated, rather than causitive	1	low	0	0	0.315559
DTXSID50858795	26967760	26967-76-0	Tris(isopropylphenyl) phosphate		CC(C)C1=CC=C(C=C1)OP(=O)(OC2=CC=C(C=C2)C(C)C)OC3=CC=C(C=C3)C(C)C	pubchem_smiles	0	0	0	0	0	0	1	0	0	0	0	0	0	0	1	1	0	1	0	0	1		non-halognated organic	3	med	0	0	0.887289
DTXSID40949863	27104309	27104-30-9	Tetrakis(hydroxymethyl)phosphanium carbamimidate--hydrogen chloride (1/1/1)	C5H16ClN2O5P	Cl.NC([O-])=N.OC[P+](CO)(CO)CO	canonical_smiles	0	1	0	1	0	0	0	0	1	0	0	0	0	0	0	0	0	1	0	0	1		This contains a Chloride ion but not a carbon-halogen bond so is not considered an OFR	2	med	0	0	0.810557
DTXSID00181969	27568907	27568-90-7	Ethanol, 2bromo, phosphate (3:1)	C6H12Br3O4P	BrCCOP(=O)(OCCBr)OCCBr	qsar_ready_smiles	0	0	0	0	0	0	0	0	0	0	0	0	0	0	1	0	1	0	0	0	1	polyhalogenated organophosphates		1	low	0	0	0.92907
DTXSID201016690	27581131	27581-13-1	2,3,4,5-Tetrabromobenzoic Acid	C7H2Br4O2	OC(=O)C1=C(Br)C(Br)=C(Br)C(Br)=C1	qsar_ready_smiles	0	0	0	1	0	0	0	0	0	0	0	0	0	0	1	0	1	0	0	0	1	polyhalogenated phthalates/benzoates/imides		2	med	0	0	0.82157
DTXSID001016751	27858077	27858-07-7	Octabromobiphenyl		C1=CC(=C(C(=C1C2=C(C(=C(C(=C2Br)Br)Br)Br)Br)Br)Br)Br	pubchem_smiles	0	0	0	0	0	1	0	0	0	0	0	0	1	0	1	0	1	0	0	0	1	polyhalogenated benzenes		3	med	0	0	0.969686
DTXSID6025484	28108998	28108-99-8	Isopropyl phenyl diphenyl phosphate		CC(C)c1ccccc1OP(=O)(Oc2ccccc2)Oc3ccccc3	pubchem_smiles	0	0	0	0	0	1	0	1	0	0	0	0	0	0	1	0	0	1	0	0	1			3	med	0	0	0.913961
DTXSID9051957	28109004	28109-00-4	Bis(isopropylphenyl) phenyl phosphate		CC(C)C1=CC=CC=C1OP(=O)(OC2=CC=CC=C2)OC3=CC=CC=C3C(C)C	pubchem_smiles	0	0	0	0	0	0	0	0	0	0	0	0	0	0	1	0	0	1	0	0	1		see supplemental NAS note	1	low	0	0	0.913961
DTXSID6094435	28205790	28205-79-0	Ethanol, 2-chloro-, phosphate (3:1), homopolymer				0	0	0	0	0	0	0	1	1	0	0	0	0	0	0	0	0	0	1	0	1		polymeric	2	med	0	0	0
DTXSID60872801	28906130	28906-13-0	2,2Bis(3,5dibromo4hydroxyphenyl)propanephosgene copolymer				0	0	0	0	0	0	0	0	0	0	0	0	0	0	1	0	0	0	1	0	1		polymeric	1	low	0	0	0
DTXSID80904259	29426786	29426-78-6	4,4'(propane2,2diyl)bis(2bromophenol)	C15H14Br2O2	CC(C)(C1=CC(Br)=C(O)C=C1)C1=CC(Br)=C(O)C=C1	qsar_ready_smiles	0	0	0	0	0	0	0	0	0	0	0	0	0	0	1	0	1	0	0	0	1	polyhalogenated bisphenol aliphatics and functionalized		1	low	0	0	0.714585
DTXSID7075212	29660682	29660-68-2	Phosphoric acid, dimethylphenyl diphenyl ester	C20H19O4P	CC1=CC=CC(OP(=O)(OC2=CC=CC=C2)OC2=CC=CC=C2)=C1C	qsar_ready_smiles	0	0	0	0	0	0	0	0	0	0	0	0	0	0	1	0	0	1	0	0	1			1	low	0	0	0.915096
DTXSID901016653	29716447	29716-44-7	Tris(chloroethyl) phosphate		C(CCl)OP(=O)(OCCCl)OCCCl	pubchem_smiles	0	0	0	1	0	0	0	0	0	0	0	0	0	0	0	0	1	0	0	0	1	polyhalogenated organophosphates		1	low	0	0	0.941206
DTXSID3025465	29761215	29761-21-5	Isodecyl diphenyl phosphate		CC(C)CCCCCCCOP(=O)(OC1=CC=CC=C1)OC2=CC=CC=C2	pubchem_smiles	0	0	0	1	0	1	0	1	1	0	0	0	1	0	1	0	0	1	0	0	1		organic-non-halognated	6	high	0	0	0.924705
DTXSID90700608	30178928	30178-92-8	1,1,2,2-Tetrabromocyclododecane	C12H20Br4	BrC1(Br)CCCCCCCCCCC1(Br)Br	qsar_ready_smiles	0	0	0	0	0	0	0	1	0	0	0	0	0	0	0	0	1	0	0	0	1	polyhalogenated alicycles		1	low	0	1	0.691651
DTXSID401029839	30554735	30554-73-5	Tribromotrichlorocyclohexane		C1CC(C(C(C1)(Br)Br)(Cl)Br)(Cl)Cl	pubchem_smiles	0	0	0	0	0	0	0	0	0	0	0	0	0	0	1	0	1	0	0	0	1	polyhalogenated alicycles	Check Dashboard/CAS. PUBCHEM ID is 21447967	1	low	0	0	0.923
DTXSID0052702	31107445	31107-44-5	1,2,3,4,6,7,8,9,10,10,11,11-dodecachloro-1,4,4a,5a,6,9,9a,9b-octahydro-1,4:6,9-dimethanodibenzofuran	C14H4Cl12O	ClC1=C(Cl)C2(Cl)C3C(OC4C3C3(Cl)C(Cl)=C(Cl)C4(Cl)C3(Cl)Cl)C1(Cl)C2(Cl)Cl	qsar_ready_smiles	0	0	0	1	0	1	0	0	1	0	1	0	0	1	1	0	1	0	0	0	1	polyhalogenated carbocycles		6	high	1	0	0.780304
DTXSID90953470	31454485	31454-48-5	1,3,5,7-Tetrabromocyclooctane	C8H12Br4	BrC1CC(Br)CC(Br)CC(Br)C1	qsar_ready_smiles	0	0	0	0	1	0	0	0	0	0	0	0	0	0	0	0	1	0	0	0	1	polyhalogenated alicycles		1	low	0	0	0.775045
DTXSID70885508	31611844	31611-84-4	1-Pentanone, 2,3,4,5-tetrabromo-1,5-diphenyl-	C17H14Br4O	BrC(C(Br)C(Br)C1=CC=CC=C1)C(Br)C(=O)C1=CC=CC=C1	qsar_ready_smiles	0	0	0	0	1	0	0	0	0	0	0	0	0	0	0	0	1	0	0	0	1	polyhalogenated benzene aliphatics and functionalized		1	low	0	0	0.788285
DTXSID40185608	31710324	31710-32-4	p-Tetradecachloroterphenyl	C18Cl14	ClC1=C(Cl)C(Cl)=C(C(Cl)=C1Cl)C1=C(Cl)C(Cl)=C(C(Cl)=C1Cl)C1=C(Cl)C(Cl)=C(Cl)C(Cl)=C1Cl	qsar_ready_smiles	0	0	0	0	0	0	0	0	0	0	0	0	0	0	1	0	1	0	0	0	1	polyhalogenated benzenes		1	low	0	0	0.969686
DTXSID201023178	31780264	31780-26-4	Dibromostyrene		ClCCC(Cl)OP(=O)(OC(Cl)CCCl)OC(Cl)CCCl	qsar_ready_smiles	0	0	0	1	0	0	1	1	1	1	1	0	0	1	0	1	1	0	0	0	1	polyhalogenated benzene aliphatics and functionalized	OFR, in the Dashboard, goes to 7436-90-0, PUBCHEM ID is 161726; 3/15/22 Update: retaining 31780264 as DTXSID201023178	8	high	1	0
DTXSID901016691	31977874	31977-87-4	1,1'-{[(2Z)-2,3-dibromobut-2-ene-1,4-diyl]bis(oxy)}bis(2,4,6-tribromobenzene)	C16H8Br8O2	BrC(COC1=C(Br)C=C(Br)C=C1Br)=C(Br)COC1=C(Br)C=C(Br)C=C1Br	qsar_ready_smiles	0	0	0	1	0	0	0	0	0	0	0	0	0	0	1	0	1	0	0	0	1	polyhalogenated phenol-aliphatic ether		2	med	1	0	0.926092
DTXSID2024246	32534819	32534-81-9	Pentabromodiphenyl ether	C12O	C1=CC(=C(C=C1Br)Br)OC2=CC(=C(C=C2Br)Br)Br	pubchem_smiles	0	0	0	1	1	1	1	0	1	0	0	0	1	0	1	1	1	0	0	0	1	polyhalogenated diphenyl ethers		8	high	1	0	0.960251
DTXSID8024236	32536520	32536-52-0	Octabromodiphenyl ether		C1=C(C(=C(C(=C1Br)Br)Br)Br)OC2=CC(=C(C(=C2Br)Br)Br)Br	pubchem_smiles	0	0	0	1	1	1	1	1	1	0	0	0	1	0	1	1	1	0	0	0	1	polyhalogenated diphenyl ethers		9	high	1	0	0.975126
DTXSID40412148	32577347	32577-34-7	Benzene, pentabromo(2,3dibromopropoxy)	C9H5Br7O	BrCC(Br)COC1=C(Br)C(Br)=C(Br)C(Br)=C1Br	qsar_ready_smiles	0	0	0	0	0	0	0	0	0	0	0	0	0	0	1	0	1	0	0	0	1	polyhalogenated diphenyl ethers		1	low	0	0	0.975778
DTXSID6024626	32588764	32588-76-4	1,2-Bis(tetrabromophthalimido)ethane	C18H4Br8N2O4	BrC1=C2C(=O)N(CCN3C(=O)C4=C(C3=O)C(Br)=C(Br)C(Br)=C4Br)C(=O)C2=C(Br)C(Br)=C1Br	qsar_ready_smiles	0	0	0	1	1	1	1	1	1	1	1	1	1	1	1	1	1	0	0	0	1	polyhalogenated phthalates/benzoates/imides	OFR	13	high	1	0	0.736152
DTXSID401012987	32844272	32844-27-2	Carbonic dichloride, polymer with 4,4'-(1-methylethylidene)bis[2,6-dibromophenol] and 4,4'-(1-methylethylidene)bis[phenol]		CC(C)(C1=CC=C(C=C1)O)C2=CC=C(C=C2)O.CC(C)(C1=CC(=C(C(=C1)Br)O)Br)C2=CC(=C(C(=C2)Br)O)Br.C(=O)(Cl)Cl	pubchem_smiles	0	0	0	0	0	0	0	1	1	0	0	0	0	0	1	0	0	0	1	0	1		polymeric	3	med	0	0	0
DTXSID5027980	33125869	33125-86-9	Phosphoric acid, 1,2-ethanediyl tetrakis(2-chloroethyl) ester	C10H20Cl4O8P2	ClCCOP(=O)(OCCCl)OCCOP(=O)(OCCCl)OCCCl	qsar_ready_smiles	0	0	0	1	0	0	0	0	1	0	0	0	0	0	0	0	1	0	0	0	1	polyhalogenated organophosphates		2	med	1	0	0.939674
DTXSID30885564	33798026	33798-02-6	Phenol, 4,4'-(1-methylethylidene)bis[2,6-dibromo-, 1,1'-diacetate	C19H16Br4O4	CC(=O)OC1=C(Br)C=C(C=C1Br)C(C)(C)C1=CC(Br)=C(OC(C)=O)C(Br)=C1	qsar_ready_smiles	0	0	0	1	0	1	1	0	0	1	0	0	0	1	1	0	1	0	0	0	1	polyhalogenated bisphenol aliphatics and functionalized		6	high	1	0	0.787068
DTXSID30892415	33908666	33908-66-6	Sodium hexahydroxyantimonate(1-)	H6NaO6Sb	[OH-].[OH-].[OH-].[OH-].[OH-].[OH-].[Na+].[Sb+5]	canonical_smiles	0	1	0	1	0	0	0	0	0	0	0	0	0	0	0	0	0	0	0	1	1			1	low	0	0	0.792519
DTXSID00955980	34432821	34432-82-1	Bis(2,3-dibromopropyl) hydrogen phosphate--ammonia (1/1)	C6H14Br4NO4P	OP(=O)(OCC(Br)CBr)OCC(Br)CBr	qsar_ready_smiles	1	0	0	0	0	0	0	0	1	0	0	0	0	0	0	0	1	0	0	1	1	polyhalogenated organophosphates		1	low	0	0	0.972532
DTXSID70956080	34571169	34571-16-9	1,2,3,4,7,7-Hexachloro-5-(pentabromophenyl)bicyclo[2.2.1]hept-2-ene	C13H3Br5Cl6	ClC1=C(Cl)C2(Cl)C(CC1(Cl)C2(Cl)Cl)C1=C(Br)C(Br)=C(Br)C(Br)=C1Br	qsar_ready_smiles	0	0	0	1	0	1	1	0	0	1	1	0	0	1	1	0	1	0	0	0	1	polyhalogenated carbocycles	OFR	7	high	1	0	0.93527
DTXSID5052705	35109605	35109-60-5	1,3,5-Tribromo-2-(2,3-dibromopropoxy)benzene	C9H7Br5O	BrCC(Br)COC1=C(Br)C=C(Br)C=C1Br	qsar_ready_smiles	0	0	0	1	0	1	1	0	1	1	0	1	1	1	1	0	1	0	0	0	1	polyhalogenated phenol-aliphatic ether	OFR	9	high	1	0	0.97695
DTXSID00957040	35656010	35656-01-0	Tris(2bromo4methylphenyl) phosphate	C21H18Br3O4P	CC1=CC(Br)=C(OP(=O)(OC2=C(Br)C=C(C)C=C2)OC2=C(Br)C=C(C)C=C2)C=C1	qsar_ready_smiles	0	0	0	0	0	0	0	0	0	0	0	0	0	0	1	0	1	0	0	0	1	polyhalogenated organophosphates		1	low	0	0	0.87775
DTXSID801017084	35656510	35656-51-0	polychlorodibenzo-4-dioxin				0	0	0	0	0	1	0	0	0	0	0	0	0	0	0	0	0	0	0	0	0		Dioxins are associated with and are breakdown products of flame retardants but are not flame retardants themselves	1	low	0	0	0
DTXSID10873929	35854945	35854-94-5	2,2',4,4',6,6'-Hexabromodiphenyl Ether	C12H4Br6O	BrC1=CC(Br)=C(OC2=C(Br)C=C(Br)C=C2Br)C(Br)=C1	qsar_ready_smiles	0	0	1	0	0	1	0	0	0	0	0	0	0	0	0	0	1	0	0	0	1	polyhalogenated diphenyl ethers		1	low	0	0	0.950471
DTXSID6044563	35948255	35948-25-5	6H-Dibenzo[c,e][1,2]oxaphosphinine 6-oxide	C12H9O2P	O=P1OC2=C(C=CC=C2)C2=C1C=CC=C2	qsar_ready_smiles	0	0	0	0	1	1	0	0	0	0	1	0	0	1	1	1	0	1	0	0	1			6	high	0	0	0.816848
DTXSID50957474	36065302	36065-30-2	1,3,5Tribromo2(2,3dibromo2methylpropoxy)benzene	C10H9Br5O	CC(Br)(CBr)COC1=C(Br)C=C(Br)C=C1Br	qsar_ready_smiles	0	0	0	0	0	0	0	0	0	0	0	0	0	0	1	0	1	0	0	0	1	polyhalogenated diphenyl ethers		1	low	0	0	0.960912
DTXSID20545726	36313152	36313-15-2	2,3,4,5-Tetrabromophenol	C6H2Br4O	OC1=CC(Br)=C(Br)C(Br)=C1Br	qsar_ready_smiles	0	0	0	0	0	0	0	0	0	0	0	0	0	0	1	0	1	0	0	0	1	polyhalogenated phenol derivatives		1	low	0	0	0.878364
DTXSID3025382	36355018	36355-01-8	Hexabromobiphenyl	(Br)y(Br)xC12H8			0	0	0	1	0	0	1	0	0	0	0	0	1	0	0	0	1	0	0	0	1	polyhalogenated benzenes		3	med	1	0	0
DTXSID40893054	36483575	36483-57-5	Tribromoneopentyl alcohol		C(C(CBr)(CBr)CBr)O	pubchem_smiles	0	0	0	1	1	1	1	0	1	0	1	0	0	0	1	0	1	0	0	0	1	polyhalogenated aliphatic chains	Ill-defined substance; [1522-92-5] Preferred CAS RN for this chemical; DTXSID9024641	7	high	0	0	0.810405
DTXSID6024129	36483600	36483-60-0	Hexabromodiphenyl ether		C1=C(C=C(C(=C1OC2=C(C=C(C=C2Br)Br)Br)Br)Br)Br	pubchem_smiles	0	0	0	0	1	0	0	0	1	0	0	0	1	0	0	0	1	0	0	0	1	polyhalogenated diphenyl ethers		3	med	0	1	0.975796
DTXSID70190063	36558415	36558-41-5	Bis(thiopyrophosphoric acid)	H4O5P2S2	OP(O)(=S)OP(O)(O)=S	canonical_smiles	0	0	0	0	0	0	0	0	0	0	0	0	0	0	0	1	0	1	0	0	1			1	low	0	0	0.482926
DTXSID3067992	36678452	36678-45-2	2-Butene, 1,1,2,3,4,4-hexabromo-	C4H2Br6	BrC(Br)C(Br)=C(Br)C(Br)Br	qsar_ready_smiles	0	0	0	0	1	0	0	0	0	0	0	0	0	0	0	0	1	0	0	0	1	polyhalogenated aliphatic chains		1	low	0	0	0.620252
DTXSID3020174	36711316	36711-31-6	Bis(2,3-dibromopropyl) phosphate, magnesium salt	C12H20Br8MgO8P2	OP(=O)(OCC(Br)CBr)OCC(Br)CBr	qsar_ready_smiles	1	0	0	0	0	0	0	0	1	0	0	0	0	0	0	0	1	0	0	1	1	polyhalogenated organophosphates		1	low	0	0	0.972532
DTXSID30958080	36885491	36885-49-1	Ethenyl dihydrogen phosphate	C2H5O4P	OP(O)(=O)OC=C	qsar_ready_smiles	0	0	0	0	0	1	0	0	0	0	0	0	0	0	0	0	0	1	0	0	1			1	low	0	0	0.866329
DTXSID001016668	37419424	37419-42-4	3,3',5,5'-Tetrabromobisphenol A bispropionate	C21H20Br4O4	CCC(=O)OC1=C(Br)C=C(C=C1Br)C(C)(C)C1=CC(Br)=C(OC(=O)CC)C(Br)=C1	qsar_ready_smiles	0	0	0	1	0	1	1	0	0	1	0	0	0	1	1	0	1	0	0	0	1	polyhalogenated bisphenol aliphatics and functionalized		6	high	1	0	0.762208
DTXSID3068043	37640576	37640-57-6	1,3,5-Triazine-2,4,6(1H,3H,5H)-trione, compd. with 1,3,5-triazine-2,4,6-triamine (1:1)	C6H9N9O3	NC1=NC(N)=NC(N)=N1.O=C1NC(=O)NC(=O)N1	canonical_smiles	0	0	0	0	1	1	0	0	1	0	1	0	0	0	1	0	0	1	0	0	1			5	high	0	0	0.619744
DTXSID1024627	37853591	37853-59-1	1,2-Bis(2,4,6-tribromophenoxy)ethane	C14H8Br6O2	BrC1=CC(Br)=C(OCCOC2=C(Br)C=C(Br)C=C2Br)C(Br)=C1	qsar_ready_smiles	0	0	0	1	1	1	1	0	1	1	1	1	1	1	1	1	1	0	0	0	1	polyhalogenated phenol-aliphatic ether	OFR	12	high	1	0	0.890716
DTXSID10865889	37853615	37853-61-5	Tetrabromobisphenol A dimethyl ether	C17H16Br4O2	COC1=C(Br)C=C(C=C1Br)C(C)(C)C1=CC(Br)=C(OC)C(Br)=C1	qsar_ready_smiles	0	0	0	1	1	1	1	0	1	0	0	0	0	1	1	1	1	0	0	0	1	polyhalogenated bisphenol aliphatics and functionalized	OFR	8	high	1	0	0.875352
DTXSID8028000	38051104	38051-10-4	Phosphoric acid, 2,2-bis(chloromethyl)-1,3-propanediyl tetrakis(2-chloroethyl) ester	C13H24Cl6O8P2	ClCCOP(=O)(OCCCl)OCC(CCl)(CCl)COP(=O)(OCCCl)OCCCl	qsar_ready_smiles	0	0	0	1	1	1	1	1	0	0	1	1	1	1	1	0	1	0	0	0	1	polyhalogenated organophosphates	OFR	10	high	1	0	0.969399
DTXSID10855048	38463820	38463-82-0	1,3,5-Tribromo-2-(2,3-dibromophenoxy)benzene	C12H5Br5O	BrC1=CC(Br)=C(OC2=C(Br)C(Br)=CC=C2)C(Br)=C1	qsar_ready_smiles	0	0	1	0	0	1	0	0	0	0	0	0	0	0	0	0	1	0	0	0	1	polyhalogenated diphenyl ethers		1	low	0	1	0.975756
DTXSID00959387	38521516	38521-51-6	1,2,3,4,5-Pentabromo-6-(bromomethyl)benzene	C7H2Br6	BrCC1=C(Br)C(Br)=C(Br)C(Br)=C1Br	qsar_ready_smiles	0	0	0	1	0	1	1	1	0	0	0	0	0	1	1	0	1	0	0	0	1	polyhalogenated benzene aliphatics and functionalized		6	high	1	0	0.961897
DTXSID90192685	39568995	39568-99-5	3,6-Bis(bromomethyl)-1,2,4,5-tetrabromobenzene	C8H4Br6	BrCC1=C(Br)C(Br)=C(CBr)C(Br)=C1Br	qsar_ready_smiles	0	0	0	1	0	0	0	0	1	0	0	0	0	0	0	0	1	0	0	0	1	polyhalogenated benzene aliphatics and functionalized		2	med	1	0	0.920738
DTXSID50192686	39569216	39569-21-6	2,3,4,5-Tetrabromo-6-chlorotoluene	C7H3Br4Cl	CC1=C(Cl)C(Br)=C(Br)C(Br)=C1Br	qsar_ready_smiles	0	0	0	1	0	1	1	0	0	0	0	0	0	1	1	0	1	0	0	0	1	polyhalogenated benzene aliphatics and functionalized		5	high	1	0	0.943465
DTXSID0052708	39635795	39635-79-5	4,4'-Sulphonylbis[2,6-dibromophenol]	C12H6Br4O4S	OC1=C(Br)C=C(C=C1Br)S(=O)(=O)C1=CC(Br)=C(O)C(Br)=C1	qsar_ready_smiles	0	0	0	1	0	1	1	0	1	0	0	0	0	1	1	0	1	0	0	0	1	polyhalogenated phenol derivatives		6	high	1	0	0.720005
DTXSID20960293	39686787	39686-78-7	Tetrakis(hydroxymethyl)phosphanium 2-hydroxypropanoate	C7H17O7P	OCP(CO)(CO)CO	qsar_ready_smiles	0	0	0	0	0	0	0	0	1	0	0	0	0	0	0	0	0	1	0	0	1			1	low	0	0	0.750605
DTXSID20960334	39734924	39734-92-4	Tetrakis(hydroxymethyl)phosphanium 3-carboxy-3-hydroxypropanoate	C8H17O9P	OC[P+](CO)(CO)CO.OC(CC([O-])=O)C(O)=O	canonical_smiles	0	0	0	0	0	0	0	0	1	0	0	0	0	0	0	0	0	1	0	0	1			1	low	0	0	0.585562
DTXSID10892231	40039938	40039-93-8	3,5,3',5'Tetrabromobisphenol A, epichlorohydrin polymer				0	0	0	0	0	0	0	0	0	0	0	0	0	0	1	0	0	0	1	0	1		polymeric	1	low	0	0	0
DTXSID8024319	40088479	40088-47-9	Tetrabromodiphenyl ether		C1=CC(=CC(=C1)Br)OC2=C(C(=C(C=C2)Br)Br)Br	pubchem_smiles	0	0	0	0	1	0	0	1	1	0	0	0	1	0	0	0	1	0	0	0	1	polyhalogenated diphenyl ethers		4	high	0	1	0.973155
DTXSID30866010	40703795	40703-79-5	4,7-Methano-1H-isoindole-1,3(2H)-dione, 5,6-dibromohexahydro-2-phenyl-	C15H13Br2NO2	BrC1C(Br)C2CC1C1C2C(=O)N(C1=O)C1=CC=CC=C1	qsar_ready_smiles	0	0	0	1	0	0	0	0	1	0	0	0	0	0	0	0	1	0	0	0	1	polyhalogenated carbocycles		2	med	1	0	0.726569
DTXSID8029363	41203810	41203-81-0	(5-Ethyl-2-methyl-1,3,2-dioxaphosphorinan-5-yl)methyl dimethyl phosphonate P-oxide	C9H20O6P2	CCC1(COP(C)(=O)OC)COP(C)(=O)OC1	qsar_ready_smiles	0	0	0	1	0	0	0	0	1	0	0	0	0	0	0	0	0	1	0	0	1			2	med	0	0	0.917501
DTXSID4052710	41318756	41318-75-6	2,4,4'-Tribromodiphenyl ether	C12H7Br3O	BrC1=CC=C(OC2=C(Br)C=C(Br)C=C2)C=C1	qsar_ready_smiles	0	0	0	1	0	1	0	0	0	1	1	1	0	0	1	0	1	0	0	0	1	polyhalogenated diphenyl ethers		6	high	1	0	0.918378
DTXSID6044939	41424366	41424-36-6	1,3,5Tribromo2methoxy4methylbenzene	C8H7Br3O	COC1=C(Br)C(C)=C(Br)C=C1Br	qsar_ready_smiles	0	0	0	0	0	0	0	0	0	0	0	0	0	0	1	0	1	0	0	0	1	polyhalogenated diphenyl ethers		1	low	0	0	0.875128
DTXSID9068328	41583099	41583-09-9	1,3,5-Triazine-2,4,6-triamine, phosphate		C1(=NC(=NC(=N1)N)N)N.OP(=O)(O)O	pubchem_smiles	0	0	0	0	0	1	0	0	0	0	1	0	0	0	1	0	0	1	0	0	1			3	med	0	0	0.91635
DTXSID70195215	42429889	42429-88-9	1,1':2',1''-Terphenyl, 2,2'',3,3',3'',4,4',4'',5,5',5'',6,6',6''-tetradecachloro-	C8H7Br	ClC1=C(Cl)C(Cl)=C(C(Cl)=C1Cl)C1=C(C(Cl)=C(Cl)C(Cl)=C1Cl)C1=C(Cl)C(Cl)=C(Cl)C(Cl)=C1Cl	qsar_ready_smiles	0	0	0	0	0	0	0	0	0	0	0	0	0	0	1	0	1	0	0	0	1	polyhalogenated benzenes		1	low	0	0	0.969686
DTXSID30195216	42429890	42429-89-0	1,1':3',1''-Terphenyl, 2,2',2'',3,3'',4,4',4'',5,5',5'',6,6',6''-tetradecachloro-	C18Cl14	ClC1=C(Cl)C(Cl)=C(C(Cl)=C1Cl)C1=C(Cl)C(=C(Cl)C(Cl)=C1Cl)C1=C(Cl)C(Cl)=C(Cl)C(Cl)=C1Cl	qsar_ready_smiles	0	0	0	0	0	0	0	0	0	0	0	0	0	0	1	0	1	0	0	0	1	polyhalogenated benzenes		1	low	0	0	0.969686
DTXSID9068407	42595459	42595-45-9	Bis((5-ethyl-2-methyl-1,3,2-dioxaphosphorinan-5-yl)methyl) methyl phosphonate P,P'-dioxide	C15H31O9P3	CCC1(COP(C)(=O)OCC2(CC)COP(C)(=O)OC2)COP(C)(=O)OC1	qsar_ready_smiles	0	0	0	1	0	0	0	1	1	0	0	0	0	0	0	0	0	1	0	0	1			3	med	0	0	0.917501
DTXSID40885873	42597499	42597-49-9	1,2-Benzenedicarboxylic acid, 3,4,5,6-tetrabromo-, 1-butyl ester	C12H10Br4O4	CCCCOC(=O)C1=C(Br)C(Br)=C(Br)C(Br)=C1C(O)=O	qsar_ready_smiles	0	0	0	1	0	0	0	0	0	0	0	0	0	0	0	0	1	0	0	0	1	polyhalogenated phthalates/benzoates/imides		1	low	0	0	0.841989
DTXSID5044942	42757551	42757-55-1	1,1'-Sulfonylbis[3,5-dibromo-4-(2,3-dibromopropoxy)benzene]	C18H14Br8O4S	BrCC(Br)COC1=C(Br)C=C(C=C1Br)S(=O)(=O)C1=CC(Br)=C(OCC(Br)CBr)C(Br)=C1	qsar_ready_smiles	0	0	0	1	0	1	1	0	0	0	0	0	0	1	1	0	1	0	0	0	1	polyhalogenated phenol derivatives		5	high	1	0	0.940633
DTXSID90963559	46355071	46355-07-1	Phenyl propan-2-yl hydrogen phosphate	C9H13O4P	CC(C)OP(O)(=O)OC1=CC=CC=C1	qsar_ready_smiles	0	0	0	0	0	1	0	0	0	0	0	0	0	1	1	0	0	1	0	0	1			3	med	0	0	0.914158
DTXSID60591606	46438884	46438-88-4	1,3-Dibromo-5-phenoxybenzene	C12H8Br2O	BrC1=CC(OC2=CC=CC=C2)=CC(Br)=C1	qsar_ready_smiles	0	0	1	0	0	1	0	0	0	0	0	0	0	0	0	0	1	0	0	0	1	polyhalogenated diphenyl ethers		1	low	0	0	0.905806
DTXSID9052711	49690633	49690-63-3	Tris(dibromophenyl) phosphate	C18H9Br6O4P	BrC1=C(Br)C(OP(=O)(OC2=CC=CC(Br)=C2Br)OC2=CC=CC(Br)=C2Br)=CC=C1	qsar_ready_smiles	0	0	0	1	0	0	0	0	1	0	0	0	0	0	1	0	1	0	0	0	1	polyhalogenated organophosphates		3	med	1	0	0.915772
DTXSID50881109	49690940	49690-94-0	Tribromodiphenyl ether		C1=CC=C(C(=C1)OC2=CC(=C(C=C2)Br)Br)Br	pubchem_smiles	0	0	1	0	0	0	0	0	1	0	0	0	0	0	0	0	1	0	0	0	1	polyhalogenated diphenyl ethers		1	low	0	1	0.927619
DTXSID60879850	51452870	51452-87-0	BDE-4	C12H8Br2O	BrC1=CC=CC=C1OC1=C(Br)C=CC=C1	qsar_ready_smiles	0	0	1	0	0	1	0	0	0	0	0	0	0	0	0	0	1	0	0	0	1	polyhalogenated diphenyl ethers		1	low	0	0	0.848987
DTXSID00199847	51892263	51892-26-3	2,4Dichlorodiphenyl ether	C12H8Cl2O	ClC1=CC(Cl)=C(OC2=CC=CC=C2)C=C1	qsar_ready_smiles	0	0	0	0	0	0	0	0	0	0	0	0	0	0	1	0	1	0	0	0	1	polyhalogenated diphenyl ethers		1	low	0	0	0.932772
DTXSID00477016	51930042	51930-04-2	Benzene, 1,3-dibromo-2-phenoxy-	C12H8Br2O	BrC1=CC=CC(Br)=C1OC1=CC=CC=C1	qsar_ready_smiles	0	0	0	0	0	1	0	0	0	0	0	0	0	0	1	0	1	0	0	0	1	polyhalogenated diphenyl ethers		2	med	0	1	0.928458
DTXSID80866227	51936551	51936-55-1	7,8-Dibromo-1,2,3,4,11,11-hexachloro-1,4,4a,5,6,7,8,9,10,10a-decahydro-1,4-methanobenzocyclooctene	C13H12Br2Cl6	ClC1=C(Cl)C2(Cl)C3CCC(Br)C(Br)CCC3C1(Cl)C2(Cl)Cl	qsar_ready_smiles	0	0	0	1	0	1	1	0	1	1	1	1	0	1	1	0	1	0	0	0	1	polyhalogenated carbocycles	OFR	9	high	1	0	0.927814
DTXSID1068720	52221677	52221-67-7	Phosphonium, tetrakis(hydroxymethyl)-, ethanedioate (2:1) (salt)	C10H24O12P2	OCP(CO)(CO)CO	qsar_ready_smiles	0	1	0	0	0	0	0	0	1	0	0	0	0	0	0	1	0	1	0	1	1			2	med	0	0	0.750605
DTXSID20452860	52434590	52434-59-0	1,3,5-Triazine, 2,4,6-tris(2,3-dibromopropoxy)-	C12H15Br6N3O3	BrCC(Br)COC1=NC(OCC(Br)CBr)=NC(OCC(Br)CBr)=N1	qsar_ready_smiles	0	0	0	1	0	0	0	0	1	0	0	0	0	0	1	1	1	0	0	0	1	polyhalogenated triazines		4	high	1	0	0.915214
DTXSID9052713	52434909	52434-90-9	1,3,5-Tris(2,3-dibromopropyl)-1,3,5-triazine-2,4,6(1H,3H,5H)-trione	C12H15Br6N3O3	BrCC(Br)CN1C(=O)N(CC(Br)CBr)C(=O)N(CC(Br)CBr)C1=O	qsar_ready_smiles	0	0	0	1	1	1	1	0	0	1	1	0	1	1	1	0	1	0	0	0	1	polyhalogenated triazines	OFR	9	high	1	0	0.867412
DTXSID901017118	52734857	52734-85-7	Torflam Poly(nitrilo(bis(4-bromophenoxy)phosphoranylidyne))				1	0	0	0	0	1	0	0	0	0	0	0	0	0	0	0	0	0	1	0	1			1	low	0	0	0
DTXSID6052168	52907070	52907-07-0	N,N'-(Ethylene)bis[4,5-dibromohexahydro-3,6-methanophthalimide]	C20H20Br4N2O4	BrC1C(Br)C2CC1C1C2C(=O)N(CCN2C(=O)C3C4CC(C(Br)C4Br)C3C2=O)C1=O	qsar_ready_smiles	0	0	0	1	0	1	1	0	1	0	0	0	0	0	1	1	1	0	0	0	1	polyhalogenated carbocycles		6	high	1	0	0.683185
DTXSID80201295	53211226	53211-22-6	Phosphonium, tetrakis(hydroxymethyl)-, ethanedioate (1:1) (salt)	C6H13O8P	OCP(CO)(CO)CO	qsar_ready_smiles	0	1	0	0	0	0	0	0	1	0	0	0	0	0	0	0	0	1	0	0	1			1	low	0	0	0.750605
DTXSID6068854	53461828	53461-82-8	Diethylene glycol bis[bis(2-chloroethyl)phosphate]	C12H24Cl4O9P2	ClCCOP(=O)(OCCCl)OCCOCCOP(=O)(OCCCl)OCCCl	qsar_ready_smiles	0	0	0	1	0	0	0	1	0	0	0	0	0	0	0	0	1	0	0	0	1	polyhalogenated organophosphates		2	med	1	0	0.856275
DTXSID1068859	53506006	53506-00-6	Propanenitrile, 3,3',3'',3'''-[(2,3,5,6-tetramethyl-1,4-phenylene)bis(methylenephosphinylidyne)]tetrakis-	C24H32N4O2P2	CC1=C(C)C(CP(=O)(CCC#N)CCC#N)=C(C)C(C)=C1CP(=O)(CCC#N)CCC#N	qsar_ready_smiles	0	0	0	0	0	0	0	1	0	0	0	0	0	0	0	0	0	1	0	0	1			1	low	0	0	0.815083
DTXSID70879967	53551874	53551-87-4	BDE-168	C12H4Br6O	BrC1=CC(Br)=C(OC2=CC(Br)=C(Br)C(Br)=C2)C(Br)=C1	qsar_ready_smiles	0	0	1	0	0	1	0	0	0	0	0	0	0	0	0	0	1	0	0	0	1	polyhalogenated diphenyl ethers		1	low	0	0	0.982102
DTXSID10201783	53563567	53563-56-7	Diphenyl ether, dibromo-	C12H8Br2O			0	0	1	0	0	1	0	0	0	0	0	0	0	0	0	0	1	0	0	0	1	polyhalogenated diphenyl ethers		1	low	0	1	0
DTXSID101017114	53587443	53587-44-3	Boric acid (H3BO3)​, compound with 1,​3,​5-​triazine-​2,​4,​6-​triamine				0	0	0	0	0	1	0	1	0	0	0	0	0	0	0	0	0	1	0	1	1			2	med	0	0	0
DTXSID60970533	55205384	55205-38-4	(Propane-2,2-diyl)bis(2,6-dibromo-4,1-phenylene) diprop-2-enoate	C21H16Br4O4	CC(C)(C1=CC(Br)=C(OC(=O)C=C)C(Br)=C1)C1=CC(Br)=C(OC(=O)C=C)C(Br)=C1	qsar_ready_smiles	0	0	0	1	0	1	1	0	0	1	0	0	0	1	1	0	1	0	0	0	1	polyhalogenated bisphenol aliphatics and functionalized		6	high	1	0	0.794696
DTXSID601016692	55481602	55481-60-2	dimethyl 3,4,5,6-tetrabromobenzene-1,2-dicarboxylate	C10H6Br4O4	COC(=O)C1=C(Br)C(Br)=C(Br)C(Br)=C1C(=O)OC	qsar_ready_smiles	0	0	0	1	0	0	1	0	0	0	0	0	0	0	0	0	1	0	0	0	1	polyhalogenated phthalates/benzoates/imides		2	med	1	0	0.865384
DTXSID0021331	55566308	55566-30-8	Tetrakis(hydroxymethyl)phosphonium sulfate	C8H24O12P2S	OCP(CO)(CO)CO	qsar_ready_smiles	0	0	0	1	0	0	0	0	1	0	0	0	0	0	0	1	0	1	0	0	1			3	med	0	0	0.750605
DTXSID701017112	55818865	55818-86-5	Fyrquel GT				0	1	0	0	0	1	0	0	0	0	0	0	0	0	0	0	0	1	0	0	1		Containing triphenylphosphate, dicresyl xylenyl phosphate isomers, dicresyl phenyl phosphate, cresyl diphenyl phosphate isomers and di(C3-phenyl) xylenyl phosphate isomer	1	low	0	0	0
DTXSID00971221	55818967	55818-96-7	Tetrakis(hydroxymethyl)phosphanium phosphate acetate (4/1/1)	C18H51O22P5	OCP(CO)(CO)CO	qsar_ready_smiles	0	1	0	0	0	0	0	0	1	0	0	0	0	0	0	0	0	1	0	1	1			1	low	0	0	0.750605
DTXSID6024701	56803373	56803-37-3	tert-Butylphenyl diphenyl phosphate		CC(C)(C)C1=CC=CC=C1OP(=O)(OC2=CC=CC=C2)OC3=CC=CC=C3	pubchem_smiles	0	0	0	1	0	1	0	1	0	0	0	0	1	0	1	0	0	1	0	0	1			5	high	0	0	0.907367
DTXSID30972327	56890892	56890-89-2	1,2,3,4,7,7-Hexachloro-5-(2,4,6-tribromophenyl)bicyclo[2.2.1]hept-2-ene	C13H5Br3Cl6	ClC1=C(Cl)C2(Cl)C(CC1(Cl)C2(Cl)Cl)C1=C(Br)C=C(Br)C=C1Br	qsar_ready_smiles	0	0	0	0	0	0	0	0	0	0	0	0	0	0	1	0	1	0	0	0	1	polyhalogenated benzenes		1	low	0	0	0.927802
DTXSID10872795	56974608	56974-60-8	Dimelamine monophosphate	C6H15N12O4P	NC1=NC(N)=NC(N)=N1	qsar_ready_smiles	0	0	0	0	0	0	0	1	0	0	0	0	0	0	0	0	0	1	0	0	1			1	low	0	0	0.739152
DTXSID10850114	57011479	57011-47-9	Pentabromophenyl benzoate	C13H5Br5O2	BrC1=C(Br)C(Br)=C(OC(=O)C2=CC=CC=C2)C(Br)=C1Br	qsar_ready_smiles	0	0	0	1	0	0	0	0	1	0	0	0	0	0	0	1	1	0	0	0	1	polyhalogenated benzene aliphatics and functionalized		3	med	1	0	0.947524
DTXSID301016693	57137107	57137-10-7	Poly(tribromostyrene)				0	0	0	0	0	0	0	1	1	0	0	0	0	0	1	1	0	0	1	0	1		polymeric	4	high	0	0	0
DTXSID8069197	57583547	57583-54-7	Tetraphenyl m-phenylene bis(phosphate)	C30H24O8P2	O=P(OC1=CC=CC=C1)(OC1=CC=CC=C1)OC1=CC(OP(=O)(OC2=CC=CC=C2)OC2=CC=CC=C2)=CC=C1	qsar_ready_smiles	0	0	0	0	0	1	0	1	1	0	1	0	0	1	1	1	0	1	0	0	1		organic-non-halognated	7	high	0	0	0.907696
DTXSID001016694	57829897	57829-89-7	1-(2,3-dibromopropyl)-3,5-di(prop-2-en-1-yl)-1,3,5-triazinane-2,4,6-trione	C12H15Br2N3O3	BrCC(Br)CN1C(=O)N(CC=C)C(=O)N(CC=C)C1=O	qsar_ready_smiles	0	0	0	1	0	0	1	0	0	1	1	0	0	1	1	0	1	0	0	0	1	polyhalogenated triazines		6	high	1	0	0.86393
DTXSID9050488	58398713	58398-71-3	Calcium magnesium hydroxide oxide	CaH2MgO3	[OH-].[OH-].[O--].[Mg++].[Ca++]	canonical_smiles	0	0	0	0	0	1	0	0	0	0	1	0	0	0	0	0	0	0	0	1	1			2	med	0	0	0.721658
DTXSID70728087	58495093	58495-09-3	1,2,3,4,5-Pentabromo-6-(chloromethyl)benzene	C7H2Br5Cl	ClCC1=C(Br)C(Br)=C(Br)C(Br)=C1Br	qsar_ready_smiles	0	0	0	1	0	1	1	0	0	0	0	0	0	1	1	0	1	0	0	0	1	polyhalogenated benzene aliphatics and functionalized		5	high	1	0	0.961897
DTXSID8047507	58965665	58965-66-5	Perbromo-1,4-diphenoxybenzene	C18Br14O2	BrC1=C(Br)C(Br)=C(OC2=C(Br)C(Br)=C(OC3=C(Br)C(Br)=C(Br)C(Br)=C3Br)C(Br)=C2Br)C(Br)=C1Br	qsar_ready_smiles	0	0	0	1	0	1	1	1	1	1	1	0	1	1	1	1	1	0	0	0	1	polyhalogenated diphenyl ethers	OFR	11	high	1	0	0.98377
DTXSID201009900	59080374	59080-37-4	2,2',5,5'-Tetrabromobiphenyl	C12H6Br4	BrC1=CC(=C(Br)C=C1)C1=C(Br)C=CC(Br)=C1	qsar_ready_smiles	0	0	0	1	0	1	0	0	0	1	0	0	0	0	1	0	1	0	0	0	1	polyhalogenated benzenes		4	high	1	0	0.767723
DTXSID9074771	59080396	59080-39-6	PBB 103	C12H5Br5	BrC1=CC(=C(Br)C=C1)C1=C(Br)C=C(Br)C=C1Br	qsar_ready_smiles	0	0	0	1	0	1	0	0	0	1	0	0	0	0	1	0	1	0	0	0	1	polyhalogenated benzenes		4	high	1	0	0.913167
DTXSID70858838	59080409	59080-40-9	2,2',4,4',5,5'-Hexabromobiphenyl	C12H4Br6	BrC1=CC(Br)=C(C=C1Br)C1=C(Br)C=C(Br)C(Br)=C1	qsar_ready_smiles	0	0	0	1	0	1	0	0	1	1	0	1	0	0	1	0	1	0	0	0	1	polyhalogenated benzenes		6	high	1	0	0.924704
DTXSID00207815	59080410	59080-41-0	2,3,5,6,2',3',5',6'-Octabromobiphenyl	C12H2Br8	BrC1=CC(Br)=C(Br)C(=C1Br)C1=C(Br)C(Br)=CC(Br)=C1Br	qsar_ready_smiles	0	0	1	0	0	0	0	0	0	0	0	0	0	0	1	0	1	0	0	0	1	polyhalogenated benzenes		1	low	0	0	0.924704
DTXSID9052719	59447551	59447-55-1	(Pentabromophenyl)methyl acrylate	C10H5Br5O2	BrC1=C(Br)C(Br)=C(COC(=O)C=C)C(Br)=C1Br	qsar_ready_smiles	0	0	0	1	1	1	1	0	1	1	1	0	0	1	1	1	1	0	0	0	1	polyhalogenated benzene aliphatics and functionalized	OFR	10	high	1	0	0.904704
DTXSID70872796	59447573	59447-57-3	Poly(pentabromobenzyl acrylate)		C=CC(=O)OCC1=C(C(=C(C(=C1Br)Br)Br)Br)Br	pubchem_smiles	0	0	0	1	1	1	0	0	1	0	0	0	0	0	1	1	1	0	0	0	1	polyhalogenated benzenes		6	high	0	0	0.904704
DTXSID5021174	59536651	59536-65-1	Polybrominated biphenyls (PBB)		C1=CC(=C(C(=C1C2=CC(=C(C(=C2)Br)Br)Br)Br)Br)Br	pubchem_smiles	0	0	0	0	0	1	0	0	1	0	0	0	0	0	0	0	1	0	0	0	1	polyhalogenated benzenes		2	med	0	0	0.936045
DTXSID2069365	59789514	59789-51-4	1H-Pyrrole-2,5-dione, 1-(2,4,6-tribromophenyl)-	C10H4Br3NO2	BrC1=CC(Br)=C(N2C(=O)C=CC2=O)C(Br)=C1	qsar_ready_smiles	0	0	0	0	1	0	0	1	0	0	0	0	0	0	1	1	1	0	0	0	1	polyhalogenated benzenes		4	high	0	0	0.610625
DTXSID40890902	59794159	59794-15-9	Calcium borate silicate		B([O-])([O-])[O-].B([O-])([O-])[O-].O[Si](=O)O.[Ca+2].[Ca+2].[Ca+2]	pubchem_smiles	0	0	0	0	0	1	0	0	0	0	0	0	0	0	0	0	0	0	0	1	1			1	low	0	0	0.896549
DTXSID60975467	60044248	60044-24-8	2,2',4,5-Tetrabromo-1,1'-biphenyl	C12H6Br4	BrC1=CC=CC=C1C1=CC(Br)=C(Br)C=C1Br	qsar_ready_smiles	0	0	0	1	0	1	0	0	0	1	0	0	0	0	0	0	1	0	0	0	1	polyhalogenated benzenes		3	med	1	0	0.924704
DTXSID5074769	60044259	60044-25-9	PBB 053	C12H6Br4	BrC1=CC(=C(Br)C=C1)C1=C(Br)C=CC=C1Br	qsar_ready_smiles	0	0	1	1	0	0	0	0	0	0	0	0	0	0	0	0	1	0	0	0	1	polyhalogenated benzenes	see supplemental NAS note	1	low	1	0	0.866208
DTXSID10208772	60044260	60044-26-0	3,3',4,4',5,5'-Hexabromobiphenyl	C12H4Br6	BrC1=CC(=CC(Br)=C1Br)C1=CC(Br)=C(Br)C(Br)=C1	qsar_ready_smiles	0	0	0	1	0	1	0	0	0	1	0	0	0	0	1	0	1	0	0	0	1	polyhalogenated benzenes		4	high	1	0	0.913138
DTXSID9030048	60348609	60348-60-9	2,2',4,4',5-Pentabromodiphenyl ether	C12H5Br5O	BrC1=CC(Br)=C(OC2=C(Br)C=C(Br)C(Br)=C2)C=C1	qsar_ready_smiles	0	0	0	1	0	1	0	0	0	1	1	1	0	0	1	0	1	0	0	0	1	polyhalogenated diphenyl ethers		6	high	1	0	0.960251
DTXSID00894087	60371144	60371-14-4	Bromkal 70				1	0	1	0	0	1	0	0	0	0	0	0	0	0	0	0	1	0	0	0	1	polyhalogenated diphenyl ethers		1	low	0	0	0
DTXSID30209584	60763395	60763-39-5	Isopropyl diphenyl phosphate	C15H17O4P	CC(C)OP(=O)(OC1=CC=CC=C1)OC1=CC=CC=C1	qsar_ready_smiles	0	0	0	0	0	0	0	1	0	0	0	0	0	0	0	0	0	1	0	0	1			1	low	0	0	0.915922
DTXSID1069455	61090899	61090-89-9	2,4,8,10-Tetraoxa-3,9-diphosphaspiro[5.5]undecane, 3,9-bis[3-bromo-2,2-bis(bromomethyl)propoxy]-, 3,9-dioxide	C15H24Br6O8P2	BrCC(CBr)(CBr)COP1(=O)OCC2(CO1)COP(=O)(OCC(CBr)(CBr)CBr)OC2	qsar_ready_smiles	0	0	0	1	0	0	0	0	1	0	0	0	0	0	0	0	1	0	0	0	1	polyhalogenated organophosphates		2	med	1	0	0.937141
DTXSID60886428	61262531	61262-53-1	Benzene, 1,1'-[1,2-ethanediylbis(oxy)]bis[2,3,4,5,6-pentabromo-	C14H4Br10O2	BrC1=C(Br)C(Br)=C(OCCOC2=C(Br)C(Br)=C(Br)C(Br)=C2Br)C(Br)=C1Br	qsar_ready_smiles	0	0	0	1	1	0	0	1	1	0	0	0	1	0	1	1	1	0	0	0	1	polyhalogenated phenol-aliphatic ether		7	high	1	0	0.963187
DTXSID701016695	61288139	61288-13-9	Bromkal 80				1	0	0	0	0	0	0	0	1	0	0	0	0	0	0	0	1	0	0	0	1	polyhalogenated diphenyl ethers		1	low	0	0	0
DTXSID401016696	61368341	61368-34-1	Tribromostyrene (mixed isomers)		C1=CC=C(C=C1)C(=C(Br)Br)Br	pubchem_smiles	0	0	0	1	0	0	0	1	0	0	0	0	0	0	0	0	1	0	0	0	1	polyhalogenated benzene aliphatics and functionalized		2	med	1	0	0.664159
DTXSID90894430	61583606	61583-60-6	Molybdenum zinc oxide		[O-2].[O-2].[O-2].[O-2].[Zn+2].[Mo]	pubchem_smiles	0	0	0	1	0	0	0	0	0	0	0	0	0	0	0	0	0	0	0	1	1			1	low	0	0	0.80702
DTXSID7028061	61788769	61788-76-9	Chloroalkanes		CCCC(CCC(CC(C(CCC(CCC(C(CC(C)Cl)Cl)Cl)Cl)Cl)Cl)Cl)Cl	pubchem_smiles	0	0	0	0	1	0	1	0	0	1	0	0	0	0	0	0	1	0	0	0	1	polyhalogenated aliphatic chains		3	med	0	0	0.875016
DTXSID80107622	61840220	61840-22-0	Antiblaze 19				0	0	0	1	0	0	0	0	1	0	0	0	0	0	0	0	0	1	0	0	1		Handbook of Organophosphorus Chemistry, Robert Engel, 1992, CRC Oress small polymer, non-halogenated phosphate	2	med	0	0	0
DTXSID601017119	62588947	62588-94-7	Tetrakis(hydroxymethyl)phosphonium acetate-phosphate (1:1)	C10H29O14P3	OCP(CO)(CO)CO	qsar_ready_smiles	0	1	0	0	0	0	0	0	1	0	0	0	0	0	0	0	0	1	0	1	1			1	low	0	0	0.750605
DTXSID00889812	63316336	63316-33-6	Benzenesulfonic acid, 3,3'-sulfonylbis-, potassium salt (1:2)	C12H8K2O8S3	OS(=O)(=O)C1=CC(=CC=C1)S(=O)(=O)C1=CC(=CC=C1)S(O)(=O)=O	qsar_ready_smiles	0	1	0	0	1	1	0	0	0	0	0	0	0	0	0	0	0	0	0	1	1			2	med	0	0	0.633664
DTXSID30872797	63316438	63316-43-8	Potassium 3-(phenylsulfonyl)benzenesulfonate	C12H9KO5S2	OS(=O)(=O)C1=CC=CC(=C1)S(=O)(=O)C1=CC=CC=C1	qsar_ready_smiles	0	0	0	0	1	1	0	0	0	0	0	0	0	0	0	1	0	0	0	1	1			3	med	0	0	0.683481
DTXSID30881107	63387280	63387-28-0	1,2,3,4,5-Pentabromo-6-(2,3,4,5-tetrabromophenoxy)benzene	C12HBr9O	BrC1=CC(OC2=C(Br)C(Br)=C(Br)C(Br)=C2Br)=C(Br)C(Br)=C1Br	qsar_ready_smiles	0	0	0	0	0	1	0	0	0	0	0	1	0	0	1	0	1	0	0	0	1	polyhalogenated diphenyl ethers		3	med	0	0	0.98377
DTXSID1033325	63449398	63449-39-8	Chlorinated paraffins		CCCC(CCCC(CCC(CCC(CCC(CCCC(CCC)Cl)Cl)Cl)Cl)Cl)Cl	pubchem_smiles	0	0	0	1	1	1	0	1	1	1	1	0	0	0	0	1	1	0	0	0	1	polyhalogenated aliphatic chains	Data sources 4 and 7 also reported old generic CAS 51990126 Rolled into this CAS 63449398	8	high	1	0	0.629383
DTXSID101016697	63747580	63747-58-0	Poly-(m-phenylene methylphosphonate)				0	0	0	0	1	1	0	0	0	0	0	0	0	0	0	0	0	1	0	0	1			2	med	0	0	0
DTXSID3024233	63936561	63936-56-1	Nonabromodiphenyl ether		C1=C(C(=C(C(=C1Br)Br)Br)Br)OC2=C(C(=C(C(=C2Br)Br)Br)Br)Br	pubchem_smiles	0	0	0	0	1	0	0	0	1	0	0	0	1	0	1	0	1	0	0	0	1	polyhalogenated diphenyl ethers		4	high	0	1	0.98377
DTXSID60107625	64176427	64176-42-7	Antiblaze 78				0	1	0	0	0	0	0	0	1	0	0	0	0	0	0	0	0	0	1	0	1		mixture	1	low	0	0	0
DTXSID00214802	64532952	64532-95-2	Tris[2-(propan-2-yl)phenyl] phosphate	C27H33O4P	CC(C)C1=CC=CC=C1OP(=O)(OC1=CC=CC=C1C(C)C)OC1=CC=CC=C1C(C)C	qsar_ready_smiles	0	0	0	0	0	1	0	0	0	0	0	0	0	0	1	0	0	1	0	0	1			2	med	0	0	0.887289
DTXSID70983452	64864080	64864-08-0	Sodium bis(2,3-dibromopropyl) phosphate	C6H10Br4NaO4P	OP(=O)(OCC(Br)CBr)OCC(Br)CBr	qsar_ready_smiles	1	0	0	0	0	0	0	0	1	0	0	0	0	0	0	0	1	0	0	0	1	polyhalogenated organophosphates		1	low	0	0	0.972532
DTXSID90573490	65075083	65075-08-3	1,4-Dibromo-2-(4-bromophenoxy)benzene	C12H7Br3O	BrC1=CC=C(OC2=C(Br)C=CC(Br)=C2)C=C1	qsar_ready_smiles	0	0	1	0	0	1	0	0	0	0	0	0	0	0	0	0	1	0	0	0	1	polyhalogenated diphenyl ethers		1	low	0	1	0.888387
DTXSID3028269	65652417	65652-41-7	Bis(tert-butylphenyl)phenyl phosphate		CC(C)(C)C1=CC=CC=C1OP(=O)(OC2=CC=CC=C2)OC3=CC=CC=C3C(C)(C)C	pubchem_smiles	0	0	0	0	0	1	0	0	0	0	0	0	1	0	1	0	0	1	0	0	1			3	med	0	0	0.907367
DTXSID7049631	65997173	65997-17-3	Fiberglass				0	0	0	0	0	1	0	0	0	0	0	0	0	0	0	0	0	0	0	0	0		fiberglass is not a flame retardant	1	low	0	0	0
DTXSID10886791	66034171	66034-17-1	Diphosphoric acid, compd. with piperazine (1:1)	C4H14N2O7P2	C1CNCCN1.OP(O)(=O)OP(O)(O)=O	canonical_smiles	0	1	0	0	1	1	0	0	0	0	0	0	0	0	1	0	0	0	0	0	1			3	med	0	0	0.2226
DTXSID9070406	66108370	66108-37-0	2,2-Bis(bromomethyl)-3-chloropropyl bis[2-chloro-1-(chloromethyl)ethyl] phosphate	C11H18Br2Cl5O4P	ClCC(CCl)OP(=O)(OCC(CCl)(CBr)CBr)OC(CCl)CCl	qsar_ready_smiles	0	0	0	1	0	0	0	0	0	0	0	1	0	0	1	0	1	0	0	0	1	polyhalogenated organophosphates		3	med	1	0	0.972387
DTXSID801016698	66519184	66519-18-4	potassium bis(2,3-dibromopropyl) phosphate	C6H10Br4KO4P	OP(=O)(OCC(Br)CBr)OCC(Br)CBr	qsar_ready_smiles	1	0	0	0	0	0	0	0	1	0	0	0	0	0	0	0	1	0	0	0	1	polyhalogenated organophosphates		1	low	0	0	0.972532
DTXSID70867243	66710972	66710-97-2	Bis(p-acryloxyethoxy)tetrabromobisphenol A	C25H24Br4O6	CC(C)(C1=CC(Br)=C(OCCOC(=O)C=C)C(Br)=C1)C1=CC(Br)=C(OCCOC(=O)C=C)C(Br)=C1	qsar_ready_smiles	0	0	0	1	0	1	1	0	1	1	0	0	0	1	1	0	1	0	0	0	1	polyhalogenated bisphenol aliphatics and functionalized		7	high	1	0	0.799965
DTXSID70218014	67733522	67733-52-2	1,1'-Biphenyl, 2,2',3,4,4',5,5'-heptabromo-	C12H3Br7	BrC1=CC(Br)=C(Br)C=C1C1=CC(Br)=C(Br)C(Br)=C1Br	qsar_ready_smiles	0	0	0	1	0	1	0	0	1	1	0	0	0	0	1	0	1	0	0	0	1	polyhalogenated benzenes		5	high	1	0	0.952971
DTXSID0021173	67774327	67774-32-7	Firemaster FF-1		C1=C(C(=CC(=C1Br)Br)Br)C2=CC(=C(C=C2Br)Br)Br	pubchem_smiles	1	0	0	0	0	0	0	0	1	0	0	0	0	0	1	0	0	0	1	0	1			2	med	0	0	0
DTXSID50879985	67797095	67797-09-5	BDE-202	C12H2Br8O	BrC1=CC(Br)=C(Br)C(OC2=C(Br)C(Br)=CC(Br)=C2Br)=C1Br	qsar_ready_smiles	0	0	0	0	0	1	0	0	0	0	0	1	0	0	1	0	1	0	0	0	1	polyhalogenated diphenyl ethers		3	med	0	0	0.959707
DTXSID50218113	67888964	67888-96-4	1,1'-Biphenyl, 2,2',4,5,5'-pentabromo-	C12H5Br5	BrC1=CC(=C(Br)C=C1)C1=CC(Br)=C(Br)C=C1Br	qsar_ready_smiles	0	0	0	1	0	1	0	0	1	1	0	0	0	0	1	0	1	0	0	0	1	polyhalogenated benzenes		5	high	1	0	0.924704
DTXSID10218114	67888975	67888-97-5	2,4,5,3',4'-Pentabromobiphenyl	C12H5Br5	BrC1=CC(Br)=C(Br)C=C1C1=CC(Br)=C(Br)C=C1	qsar_ready_smiles	0	0	0	0	0	1	0	0	1	0	0	0	0	0	0	0	1	0	0	0	1	polyhalogenated benzenes		2	med	0	1	0.924704
DTXSID70218115	67888986	67888-98-6	2,2',3,4,4',5-Hexabromobiphenyl	C12H4Br6	BrC1=CC(Br)=C(Br)C=C1C1=C(Br)C(Br)=C(Br)C=C1	qsar_ready_smiles	0	0	1	0	0	0	0	0	1	0	0	0	0	0	0	0	1	0	0	0	1	polyhalogenated benzenes		1	low	0	1	0.952971
DTXSID30218116	67888997	67888-99-7	2,3',4,4'5,5'-Hexabromobiphenyl	C12H4Br6	BrC1=CC(=CC(Br)=C1Br)C1=CC(Br)=C(Br)C=C1Br	qsar_ready_smiles	0	0	1	0	0	0	0	0	1	0	0	0	0	0	0	0	1	0	0	0	1	polyhalogenated benzenes		1	low	0	1	0.952971
DTXSID10987252	67889003	67889-00-3	2,3,4,5,2',3',4',5'-Octabromobiphenyl	C12H2Br8	BrC1=C(Br)C(Br)=C(Br)C(=C1)C1=CC(Br)=C(Br)C(Br)=C1Br	qsar_ready_smiles	0	0	0	1	0	1	0	0	1	1	0	0	0	0	0	0	1	0	0	0	1	polyhalogenated benzenes		4	high	1	0	0.952971
DTXSID3097842	68333799	68333-79-9	Ammonium polyphosphates		[NH4+].[NH4+].[NH4+].[O-]P(=O)([O-])[O-]	pubchem_smiles	0	0	0	1	1	1	0	1	1	0	1	0	1	0	1	1	0	0	0	1	1		Inorganic	9	high	0	0	0.89909
DTXSID6098467	68441463	68441-46-3	1,3-Butadiene, homopolymer, brominated				0	0	0	0	0	0	0	1	1	0	0	0	0	0	1	0	0	0	1	0	1		polymeric	3	med	0	0	0
DTXSID401012399	68441623	68441-62-3	2-Butyne-1,4-diol, polymer with 2-(chloromethyl)oxirane, brominated, dehydrochlorinated, methoxylated		C1C(O1)CCl.C(C#CCO)O	pubchem_smiles	0	0	0	0	0	0	1	1	0	0	1	0	0	0	0	0	0	0	1	0	1		polymeric	3	med	0	0	0
DTXSID2029458	68527015	68527-01-5	Bromo chloro C12-30 a-alkenes				0	0	0	0	0	0	0	0	1	0	0	0	1	0	1	0	1	0	0	0	1	polyhalogenated aliphatic chains		3	med	0	0	0
DTXSID7028695	68527026	68527-02-6	Alkenes, C12-24, chloro		C=CCCCC=CCCCCCCl	pubchem_smiles	0	0	0	0	1	0	0	0	0	0	0	0	1	0	1	0	1	0	0	0	1	polyhalogenated aliphatic chains		3	med	0	0	0.767691
DTXSID4030047	68631492	68631-49-2	2,2',4,4',5,5'-Hexabromodiphenyl ether	C12H4Br6O	BrC1=CC(Br)=C(OC2=CC(Br)=C(Br)C=C2Br)C=C1Br	qsar_ready_smiles	0	0	0	1	0	1	0	0	0	1	1	1	0	0	1	0	1	0	0	0	1	polyhalogenated diphenyl ethers		6	high	1	0	0.960251
DTXSID60988350	68664062	68664-06-2	Diphenyl methylphosphonate--4,4'-(propane-2,2-diyl)diphenol (1/1)	C28H29O5P	CC(C)(C1=CC=C(O)C=C1)C1=CC=C(O)C=C1.CP(=O)(OC1=CC=CC=C1)OC1=CC=CC=C1	canonical_smiles	0	1	0	0	1	1	0	0	0	0	0	0	0	0	0	0	0	1	0	0	1			2	med	0	0	0.894084
DTXSID5028873	68920707	68920-70-7	Alkanes, C6-18, chloro				1	0	0	0	1	0	1	0	1	1	0	0	0	0	0	0	1	0	0	0	1	polyhalogenated aliphatic chains		4	high	0	0	0
DTXSID90872793	68928701	68928-70-1	2,2'-[(1-Methylethylidene)bis[(dibromo-4,1-phenylene)oxymethylene]]bis[oxirane]-4,4'-(1-methylethylidene)bis[2,6-dibromophenol] copolymer		CC(C)(C1=CC(=C(C(=C1)Br)O)Br)C2=CC(=C(C(=C2)Br)O)Br.CC(C)(C1=CC(=C(C(=C1)Br)OCC2CO2)Br)C3=CC(=C(C(=C3)Br)OCC4CO4)Br	pubchem_smiles	0	0	0	1	1	1	1	0	0	0	0	0	0	0	1	1	0	0	1	0	1		polymeric	6	high	0	0	0
DTXSID2071867	68928803	68928-80-3	Diphenyl ether, heptabromo derivative		BrC1=C(Br)C(OC2=C(Br)C(Br)=C(Br)C(Br)=C2Br)=CC=C1	canonical_smiles	0	0	0	0	1	1	0	0	1	0	0	0	1	0	0	0	1	0	0	0	1	polyhalogenated diphenyl ethers		4	high	0	1	0.98377
DTXSID20872645	68937406	68937-40-6	Triphenyl phosphates tert-butylated		CC(C)CC1=CC=C(C=C1)OP(=O)(OC2=CC=C(C=C2)CC(C)C)OC3=CC=C(C=C3)CC(C)C	pubchem_smiles	0	0	0	0	0	1	0	0	0	0	1	0	0	0	0	0	0	1	1	0	1			2	med	0	0	0.878902
DTXSID4028880	68937417	68937-41-7	Triphenyl phosphates isopropylated		CC(C)C1=CC=C(C=C1)OP(=O)(OC2=CC=C(C=C2)C(C)C)OC3=CC=C(C=C3)C(C)C	pubchem_smiles	0	0	0	1	1	1	0	1	1	0	1	0	1	0	1	0	0	1	0	0	1		organic-non-halognated	8	high	0	0	0.887289
DTXSID5028902	68952330	68952-33-0	Tar acids, cresylic, C8-rich, phosphates				0	1	0	0	0	1	0	0	0	0	0	0	0	0	0	0	0	0	1	0	1		mixture	1	low	0	0	0
DTXSID0028903	68952352	68952-35-2	Tar acids, cresylic, Ph phosphates				0	1	0	0	0	0	0	1	0	0	0	0	0	0	0	0	0	0	1	0	1		mixture	1	low	0	0	0
DTXSID9028912	68953582	68953-58-2	Quaternary ammonium compounds, bis(hydrogenated tallow alkyl)dimethyl, salts with bentonite				0	0	0	0	1	1	0	0	0	0	0	0	0	0	0	0	0	0	1	1	1			2	med	0	0	0
DTXSID50988682	68955419	68955-41-9	1Bromo4chlorodecane	C10H20BrCl	CCCCCCC(Cl)CCCBr	qsar_ready_smiles	0	0	0	0	0	0	0	0	0	0	0	0	0	0	1	0	1	0	0	0	1	polyhalogenated aliphatic chains		1	low	0	0	0.845564
DTXSID6052823	69012642	69012-64-2	Fumes, silica				0	0	0	0	0	1	0	0	0	0	0	0	0	0	0	0	0	0	0	0	0		Physical form, not a flame retardant.	1	low	0	0	0
DTXSID80988973	69248120	69248-12-0	Tetrakis(hydroxymethyl)phosphanium iodide	C4H12IO4P	OCP(CO)(CO)CO	qsar_ready_smiles	0	0	0	0	0	0	0	0	1	0	0	0	0	0	0	0	0	0	0	0	0		Flag for iodide. Not effective as flame retardants. One of many possible tetrakis flame retardants	1	low	0	0	0.750605
DTXSID00219337	69278597	69278-59-7	1,1'-Biphenyl, 2,2',3,4',5',6-hexabromo-	C12H4Br6	BrC1=CC(Br)=C(Br)C=C1C1=C(Br)C=CC(Br)=C1Br	qsar_ready_smiles	0	0	1	0	0	0	0	0	1	0	0	0	0	0	0	0	1	0	0	0	1	polyhalogenated benzenes		1	low	0	1	0.924704
DTXSID60219338	69278600	69278-60-0	2,2',3,3',4,4',5-Heptabromobiphenyl	C12H3Br7	BrC1=C(Br)C(Br)=C(C=C1)C1=CC(Br)=C(Br)C(Br)=C1Br	qsar_ready_smiles	0	0	1	0	0	0	0	0	1	0	0	0	0	0	0	0	1	0	0	0	1	polyhalogenated benzenes		1	low	0	1	0.952971
DTXSID20219339	69278611	69278-61-1	1,1'-Biphenyl, 2,2',3,3',4,4',5,6'-octabromo-	C12H2Br8	BrC1=CC(Br)=C(Br)C(Br)=C1C1=CC(Br)=C(Br)C(Br)=C1Br	qsar_ready_smiles	0	0	1	0	0	0	0	0	0	0	0	0	0	0	1	0	1	0	0	0	1	polyhalogenated benzenes		1	low	0	1	0.969686
DTXSID30219340	69278622	69278-62-2	2,2',3,3',4,4',5,5',6-Nonabromo-1,1'-biphenyl	C12HBr9	BrC1=CC(=C(Br)C(Br)=C1Br)C1=C(Br)C(Br)=C(Br)C(Br)=C1Br	qsar_ready_smiles	0	0	0	1	0	1	0	0	1	1	0	0	0	0	1	0	1	0	0	0	1	polyhalogenated benzenes		5	high	1	0	0.969686
DTXSID90872798	69882117	69882-11-7	2,4-(or 2,6)-Dibromophenol, homopolymer		C1=CC(=C(C(=C1)Br)O)Br.C1=CC(=C(C=C1Br)Br)O	pubchem_smiles	0	0	0	0	0	0	0	1	1	0	0	0	0	0	1	1	0	0	1	0	1		polymeric	4	high	0	0	0
DTXSID80220168	69887112	69887-11-2	2,2',3,3',4,5,5',6'-Octabromobiphenyl	C12H2Br8	BrC1=CC(Br)=C(Br)C(=C1Br)C1=CC(Br)=C(Br)C(Br)=C1Br	qsar_ready_smiles	0	0	1	0	0	0	0	0	0	0	0	0	0	0	1	0	1	0	0	0	1	polyhalogenated benzenes		1	low	0	1	0.952971
DTXSID501016699	70156795	70156-79-5	1,1'-sulfonylbis(3,5-dibromo-4-methoxybenzene)	C14H10Br4O4S	COC1=C(Br)C=C(C=C1Br)S(=O)(=O)C1=CC(Br)=C(OC)C(Br)=C1	qsar_ready_smiles	0	0	0	1	0	0	1	0	0	1	0	0	0	1	1	0	1	0	0	0	1	polyhalogenated bisphenol aliphatics and functionalized		5	high	1	0	0.734993
DTXSID00103429	70715069	70715-06-9	Phosphonic acid, P-methyl-, dimethyl ester, polymer with oxirane and phosphorus oxide (P2O5)				0	0	0	0	0	0	0	1	0	0	0	0	0	0	0	0	0	0	1	0	1		polymeric	1	low	0	0	0
DTXSID4072154	70776179	70776-17-9	1,3,5-Triazine-2,4,6-triamine, compd. with 3,9-dihydroxy-2,4,8,10-tetraoxa-3,9-diphosphaspiro[5.5]undecane 3,9-dioxide (2:1)	C11H22N12O8P2	NC1=NC(N)=NC(N)=N1.NC1=NC(N)=NC(N)=N1.OP1(=O)OCC2(CO1)COP(O)(=O)OC2	canonical_smiles	0	1	0	0	0	0	0	0	1	0	0	0	0	0	0	0	0	1	0	0	1			1	low	0	0	0.924522
DTXSID40103802	71011126	71011-12-6	Alkanes, C12-13, chloro				0	0	0	1	1	0	1	0	1	1	0	1	0	0	0	0	1	0	0	0	1	polyhalogenated aliphatic chains		6	high	1	0	0
DTXSID301016700	71245277	71245-27-7	Dechloran 604	C13H4Br4Cl6	ClC1=C(Cl)C2(Cl)C(CC1(Cl)C2(Cl)Cl)C1=CC(Br)=C(Br)C(Br)=C1Br	qsar_ready_smiles	0	0	0	0	0	1	0	0	0	0	0	0	0	0	1	0	1	0	0	0	1	polyhalogenated carbocycles		2	med	0	0	0.906032
DTXSID00872800	71342773	71342-77-3	Phenol, 4,4'-(1-methylethylidene)bis[2,6-dibromo-, polymer with carbonic dichloride, bis(2,4,6-tribromophenyl) ester		CC(C)(C1=CC(=C(C(=C1)Br)O)Br)C2=CC(=C(C(=C2)Br)O)Br.C1=C(C=C(C(=C1Br)O)Br)Br.C(=O)(Cl)Cl	pubchem_smiles	0	0	0	0	0	1	1	1	1	0	0	0	0	0	1	1	0	0	1	0	1		polymeric	6	high	0	0	0
DTXSID30992969	72236727	72236-72-7	Bis(1,3-dichloropropan-2-yl) hydrogen phosphate	C6H11Cl4O4P	OP(=O)(OC(CCl)CCl)OC(CCl)CCl	qsar_ready_smiles	0	0	0	0	0	0	0	0	0	0	0	0	0	0	1	0	1	0	0	0	1	polyhalogenated organophosphates		1	low	0	0	0.964675
DTXSID801017115	73082492	73082-49-2	Cellulose, 6-carboxy, ion (neg.), tetrakis(hydroxymethyl)phosphonium				0	1	0	0	0	0	0	0	1	0	0	0	0	0	0	0	0	1	0	1	1		cation/anion	1	low	0	0	0
DTXSID501017116	73083235	73083-23-5	Phosphonium, tetrakis(hydroxymethyl)-, salt with cellulose carboxymethyl ether				0	1	0	0	0	0	0	0	1	0	0	0	0	0	0	0	0	1	0	0	1		cation/anion	1	low	0	0	0
DTXSID201017117	75019908	75019-90-8	Tetrakis(hydroxymethyl)phosphonium p-toluenesulfonate	C11H19O7PS	OC[P+](CO)(CO)CO.CC1=CC=C(C=C1)S([O-])(=O)=O	canonical_smiles	0	1	0	0	0	1	0	0	1	0	0	0	0	0	0	0	0	1	1	0	1			2	med	0	0	0.794623
DTXSID001016701	75795163	75795-16-3	1,3-bis(2,3-dibromopropyl)-5-(prop-2-en-1-yl)-1,3,5-triazinane-2,4,6-trione	C12H15Br4N3O3	BrCC(Br)CN1C(=O)N(CC=C)C(=O)N(CC(Br)CBr)C1=O	qsar_ready_smiles	0	0	0	1	0	0	1	0	0	1	1	0	0	1	1	0	1	0	0	0	1	polyhalogenated triazines		6	high	1	0	0.86393
DTXSID0029557	76025086	76025-08-6	Bis(2-chloro-1-methylethyl) 2-chloropropyl phosphate	C9H18Cl3O4P	CC(Cl)COP(=O)(OC(C)CCl)OC(C)CCl	qsar_ready_smiles	0	0	0	1	0	0	0	0	0	0	0	0	0	0	0	0	1	0	0	0	1	polyhalogenated organophosphates		1	low	0	1	0.968606
DTXSID70274251	76649155	76649-15-5	(2-Chloro-1-methylethyl) bis(2-chloropropyl) phosphate	C9H18Cl3O4P	CC(Cl)COP(=O)(OCC(C)Cl)OC(C)CCl	qsar_ready_smiles	0	0	0	1	0	0	0	0	0	0	0	0	0	0	0	0	1	0	0	0	1	polyhalogenated organophosphates		1	low	0	1	0.968606
DTXSID1029049	77098078	77098-07-8	Tetrabromophthalic acid mixed esters with diethylene glycol and propylene glycol				1	0	0	1	1	1	1	0	1	0	0	0	1	0	1	0	0	0	0	0	1			7	high	0	0	0
DTXSID4074770	77102820	77102-82-0	PBB 077	C12H6Br4	BrC1=C(Br)C=C(C=C1)C1=CC(Br)=C(Br)C=C1	qsar_ready_smiles	0	0	0	1	0	1	0	0	0	1	0	0	0	0	0	0	1	0	0	0	1	polyhalogenated benzenes		3	med	1	0	0.782011
DTXSID301012772	77226905	77226-90-5	Carbonic acid, diphenyl ester, polymer with diphenyl P-methylphosphonate and 4,4'-(1-methylethylidene)bis[phenol]				0	0	0	0	1	1	0	0	0	0	0	0	0	0	0	0	0	0	1	0	1		polymeric	2	med	0	0	0
DTXSID10229705	79481213	79481-21-3	Phosphonium, tetrakis(hydroxymethyl)-, 1-naphthalenesulfonate (salt)	C14H19O7PS	OC[P+](CO)(CO)CO.[O-]S(=O)(=O)C1=CC=CC2=CC=CC=C12	canonical_smiles	0	1	0	0	0	0	0	0	1	0	0	0	0	0	0	0	0	1	0	1	1			1	low	0	0	0.793611
DTXSID101000529	79481224	79481-22-4	Tetrakis(hydroxymethyl)phosphanium naphthalene-2-sulfonate	C14H19O7PS	OC[P+](CO)(CO)CO.[O-]S(=O)(=O)C1=CC2=CC=CC=C2C=C1	canonical_smiles	0	0	0	0	0	0	0	0	1	0	0	0	0	0	0	0	0	1	0	0	1			1	low	0	0	0.793611
DTXSID501000614	79596319	79596-31-9	1~2~,1~3~,1~4~,1~5~,1~6~,2~3~,2~4~,3~2~,3~3~,3~4~,3~5~,3~6~Dodecabromo1~1~,2~1~:2~2~,3~1~terphenyl	C18H2Br12	BrC1=C(Br)C(=C(C=C1)C1=C(Br)C(Br)=C(Br)C(Br)=C1Br)C1=C(Br)C(Br)=C(Br)C(Br)=C1Br	qsar_ready_smiles	0	0	0	0	0	0	0	0	0	0	0	0	0	0	1	0	1	0	0	0	1	polyhalogenated benzenes		1	low	0	0	0.969686
DTXSID60229856	79755434	79755-43-4	3,5Dibromo2(2,4dibromophenoxy)phenol	C12H6Br4O2	OC1=C(OC2=C(Br)C=C(Br)C=C2)C(Br)=CC(Br)=C1	qsar_ready_smiles	0	0	1	0	0	0	0	0	0	0	0	0	0	0	1	0	1	0	0	0	1	polyhalogenated diphenyl ethers		1	low	0	0	0.907018
DTXSID001002372	82001216	82001-21-6	Bis[(pentabromophenyl)methyl] 3,4,5,6-tetrabromobenzene-1,2-dicarboxylate	C22H4Br14O4	BrC1=C(Br)C(Br)=C(COC(=O)C2=C(C(=O)OCC3=C(Br)C(Br)=C(Br)C(Br)=C3Br)C(Br)=C(Br)C(Br)=C2Br)C(Br)=C1Br	qsar_ready_smiles	0	0	0	1	0	0	0	0	0	0	0	0	0	0	1	0	1	0	0	0	1	polyhalogenated phthalates/benzoates/imides		2	med	1	0	0.921917
DTXSID40858926	82865892	82865-89-2	2,2',3,3',4,4'-Hexabromo-1,1'-biphenyl	C12H4Br6	BrC1=C(Br)C(Br)=C(C=C1)C1=C(Br)C(Br)=C(Br)C=C1	qsar_ready_smiles	0	0	1	0	0	0	0	0	0	0	0	0	0	0	1	0	1	0	0	0	1	polyhalogenated benzenes		1	low	0	1	0.936045
DTXSID2074110	83242233	83242-23-3	2-tert-Butylphenyl diphenyl phosphate	C22H23O4P	CC(C)(C)C1=C(OP(=O)(OC2=CC=CC=C2)OC2=CC=CC=C2)C=CC=C1	qsar_ready_smiles	0	0	0	0	0	0	0	0	0	0	0	0	0	0	1	0	0	1	0	0	1			1	low	0	0	0.907367
DTXSID90577711	83694717	83694-71-7	1-Bromo-3-(4-bromophenoxy)benzene	C12H8Br2O	BrC1=CC=C(OC2=CC(Br)=CC=C2)C=C1	qsar_ready_smiles	0	0	1	0	0	1	0	0	0	0	0	0	0	0	0	0	1	0	0	0	1	polyhalogenated diphenyl ethers		1	low	0	1	0.824198
DTXSID60232825	83929695	83929-69-5	2,2',3,3',5,5',6,6'Octabromo4phenoxy1,1'biphenyl	C18H6Br8O	BrC1=CC(Br)=C(Br)C(=C1Br)C1=C(Br)C(Br)=C(OC2=CC=CC=C2)C(Br)=C1Br	qsar_ready_smiles	0	0	0	0	0	0	0	0	0	0	0	0	0	0	1	0	1	0	0	0	1	polyhalogenated benzenes		1	low	0	0	0.979855
DTXSID20872665	84082382	84082-38-2	C10-21, chloro				1	0	0	0	0	0	1	0	1	1	0	0	0	0	0	0	1	0	0	0	1	polyhalogenated aliphatic chains		3	med	0	0	0
DTXSID601004590	84282279	84282-27-9	2Bromoethyl 5bromopentyl 2chloroethyl phosphate	C9H18Br2ClO4P	ClCCOP(=O)(OCCBr)OCCCCCBr	qsar_ready_smiles	0	0	0	0	0	0	0	0	0	0	0	0	0	0	1	0	1	0	0	0	1	polyhalogenated organophosphates		1	low	0	0	0.948762
DTXSID90866551	84303468	84303-46-8	3,3',4,4',5-Pentabromo-1,1'-biphenyl	C12H5Br5	BrC1=CC=C(C=C1Br)C1=CC(Br)=C(Br)C(Br)=C1	qsar_ready_smiles	0	0	0	1	0	0	0	0	0	1	0	0	0	0	0	0	1	0	0	0	1	polyhalogenated benzenes		2	med	1	0	0.913138
DTXSID90233264	84303480	84303-48-0	1,1'-Biphenyl, 2,3',4,4',5',6-hexabromo-	C12H4Br6	BrC1=CC(Br)=C(C(Br)=C1)C1=CC(Br)=C(Br)C(Br)=C1	qsar_ready_smiles	0	0	0	0	0	0	0	0	1	0	0	0	0	0	0	0	1	0	0	0	1	polyhalogenated benzenes		1	low	0	1	0.955818
DTXSID80872666	84776067	84776-06-7	Alkanes, C10-32, chloro				1	0	0	0	0	0	1	0	1	0	0	0	0	0	0	0	1	0	0	0	1	polyhalogenated aliphatic chains		2	med	0	0	0
DTXSID40872667	84776078	84776-07-8	Alkanes, C16-27, chloro				1	0	0	0	0	0	0	0	1	0	0	0	0	0	0	0	1	0	0	0	1	polyhalogenated aliphatic chains		1	low	0	0	0
DTXSID2052732	84852539	84852-53-9	1,1'-Ethane-1,2-diylbis(pentabromobenzene)	C14H4Br10	BrC1=C(Br)C(Br)=C(CCC2=C(Br)C(Br)=C(Br)C(Br)=C2Br)C(Br)=C1Br	qsar_ready_smiles	0	0	0	1	1	1	1	1	0	1	1	1	1	1	1	1	1	0	0	0	1	polyhalogenated benzene aliphatics and functionalized	OFR	12	high	1	0	0.928042
DTXSID00872668	85049269	85049-26-9	Alkanes, C16-​35, chloro				1	0	0	0	0	0	0	0	1	0	0	0	0	0	0	0	1	0	0	0	1	polyhalogenated aliphatic chains		1	low	0	0	0
DTXSID3029813	85422920	85422-92-0	Chlorinated paraffin oils				1	0	0	0	0	0	1	0	1	0	0	0	0	0	0	0	1	0	0	0	1	polyhalogenated aliphatic chains		2	med	0	0	0
DTXSID9047548	85446179	85446-17-9	1,1'-Oxybis(2,3,4,5-tetrabromobenzene)	C12H2Br8O	BrC1=C(Br)C(Br)=C(Br)C(OC2=CC(Br)=C(Br)C(Br)=C2Br)=C1	qsar_ready_smiles	0	0	0	1	0	1	0	0	0	0	0	0	0	0	1	0	1	0	0	0	1	polyhalogenated diphenyl ethers		3	med	1	0	0.975126
DTXSID40105260	85535848	85535-84-8	C10-13 chloro alkanes				0	0	0	1	0	0	1	0	1	1	0	1	0	0	1	0	1	0	0	0	1	polyhalogenated aliphatic chains	SCCP	6	high	1	0	0
DTXSID2040313	85535859	85535-85-9	Cercelor S 52 (MCCP)				0	0	0	1	1	1	1	1	1	1	1	0	0	0	1	0	1	0	0	0	1	polyhalogenated aliphatic chains	Chlorinated Paraffins Also mapped to DTXSID10872457 in NAS, OFR ID #67	9	high	1	0	0
DTXSID60872629	85535860	85535-86-0	C18-28 Chloroalkanes				1	0	0	0	0	0	0	0	1	1	0	0	0	0	0	0	1	0	0	0	1	polyhalogenated aliphatic chains		2	med	0	0	0
DTXSID30872671	85536227	85536-22-7	Alkanes, C12-​14, chloro				1	0	0	0	0	0	1	0	1	0	0	0	0	0	0	0	1	0	0	0	1	polyhalogenated aliphatic chains		2	med	0	0	0
DTXSID70872670	85681738	85681-73-8	Chloroalkanes, C10-​14				1	0	0	0	0	0	1	0	1	1	0	0	0	0	0	0	1	0	0	0	1	polyhalogenated aliphatic chains		3	med	0	0	0
DTXSID30105330	88497567	88497-56-7	Benzene, ethenyl-, homopolymer, brominated		CCC(C)C1=CC=C(C=C1)Br	pubchem_smiles	0	0	0	1	1	1	1	1	0	0	0	0	0	0	1	1	0	0	1	0	1		polymeric	7	high	0	0	0
DTXSID70849024	90075915	90075-91-5	Bis[(pentabromophenyl)methyl] benzene-1,4-dicarboxylate	C22H8Br10O4	BrC1=C(Br)C(Br)=C(COC(=O)C2=CC=C(C=C2)C(=O)OCC2=C(Br)C(Br)=C(Br)C(Br)=C2Br)C(Br)=C1Br	qsar_ready_smiles	0	0	0	1	0	0	0	0	0	0	0	0	0	0	1	0	1	0	0	0	1	polyhalogenated phthalates/benzoates/imides		2	med	1	0	0.921917
DTXSID40888243	92484076	92484-07-6	2-Butenediamide, N1,N4-bis(2,4,6-tribromophenyl)-, (2E)-	C16H8Br6N2O2			0	0	0	0	1	0	0	0	0	0	0	0	0	0	0	0	1	0	0	0	1	polyhalogenated phthalates/benzoates/imides		1	low	0	0	0
DTXSID701016702	93202892	93202-89-2	N-2,3-Dibromopropyl-4,5-dibromohexahydrophthalimide	C11H13Br4NO2	BrCC(Br)CN1C(=O)C2CC(Br)C(Br)CC2C1=O	qsar_ready_smiles	0	0	0	0	1	0	0	0	0	0	0	0	0	0	0	0	1	0	0	0	1	polyhalogenated phthalates/benzoates/imides		1	low	0	0	0.73818
DTXSID80877030	93703481	93703-48-1	BDE-77	C12H6Br4O	BrC1=C(Br)C=C(OC2=CC(Br)=C(Br)C=C2)C=C1	qsar_ready_smiles	0	0	0	0	0	1	0	0	0	0	0	0	0	0	1	0	1	0	0	0	1	polyhalogenated diphenyl ethers		2	med	0	1	0.883673
DTXSID601015670	94334642	94334-64-2	Carbonic dichloride, polymer with 4,​4'-​(1-​methylethylidene)​bis[2,​6-​dibromophenol] and phenol		CC(C)(C1=CC(=C(C(=C1)Br)O)Br)C2=CC(=C(C(=C2)Br)O)Br.C1=CC=C(C=C1)O.C(=O)(Cl)Cl	pubchem_smiles	0	0	0	0	0	1	1	1	0	0	0	0	0	0	1	0	0	0	1	0	1		polymeric	4	high	0	0	0
DTXSID80893715	97416847	97416-84-7	1,1'-(Isopropylidene)bis(3,5-dibromo-4-(2,3-dibromo-2-methylpropoxy)benzene)	C23H24Br8O2	CC(Br)(CBr)COC1=C(Br)C=C(C=C1Br)C(C)(C)C1=CC(Br)=C(OCC(C)(Br)CBr)C(Br)=C1	qsar_ready_smiles	0	0	0	0	1	1	0	0	0	0	1	0	0	0	1	0	1	0	0	0	1	polyhalogenated bisphenol aliphatics and functionalized		4	high	0	0	0.933567
DTXSID30109297	97553430	97553-43-0	Paraffins (petroleum), normal C>10, chloro				1	0	0	0	0	0	1	0	1	1	0	0	0	0	0	0	1	0	0	0	1	polyhalogenated aliphatic chains		3	med	0	0	0
DTXSID60872669	97659466	97659-46-6	Alkanes, C10-26, chloro				1	0	0	0	0	0	1	0	1	1	0	0	0	0	0	0	1	0	0	0	1	polyhalogenated aliphatic chains		3	med	0	0	0
DTXSID70760588	98923489	98923-48-9	4-Bromo-2-chlorobutyl 3-bromo-2,2-dimethylpropyl phosphate	C9H17Br2ClO4P	CC(C)(CBr)COP(O)(=O)OCC(Cl)CCBr	qsar_ready_smiles	0	0	0	0	0	0	0	1	0	0	0	0	0	0	0	0	1	0	0	0	1	polyhalogenated organophosphates		1	low	0	0	0.970852
DTXSID00904130	99717563	99717-56-3	2-bromoallyl 2,4,6-tribromophenyl ethe	C9H6Br4O	BrC(=C)COC1=C(Br)C=C(Br)C=C1Br	qsar_ready_smiles	0	0	0	0	0	0	0	0	0	0	0	1	0	0	1	0	1	0	0	0	1	polyhalogenated phenol-aliphatic ether		2	med	0	0	0.864749
DTXSID30708183	103173666	103173-66-6	1,1'-Oxybis(3,5-dibromobenzene)	C12H6Br4O	BrC1=CC(OC2=CC(Br)=CC(Br)=C2)=CC(Br)=C1	qsar_ready_smiles	0	0	1	0	0	1	0	0	0	0	0	0	0	0	0	0	1	0	0	0	1	polyhalogenated diphenyl ethers		1	low	0	0	0.889054
DTXSID20858924	106232853	106232-85-3	Alkanes, C18-20, chloro				1	0	0	0	1	0	0	0	1	1	0	0	0	0	0	0	1	0	0	0	1	polyhalogenated aliphatic chains		3	med	0	0	0
DTXSID80858925	106232864	106232-86-4	Alkanes, C22-40, chloro				1	0	0	0	0	0	0	0	1	0	0	0	0	0	0	0	1	0	0	0	1	polyhalogenated aliphatic chains		1	low	0	0	0
DTXSID10872316	108171262	108171-26-2	C10-12 chloroalkanes		CCC(Cl)C(Cl)C(Cl)CC(Cl)C(Cl)C(C)Cl	canonical_smiles	1	0	0	0	0	0	1	0	1	1	0	0	0	0	0	0	1	0	0	0	1	polyhalogenated aliphatic chains		3	med	0	0	0.866872
DTXSID7024823	108171273	108171-27-3	Chloro C22-26 alkanes		CC(CCCC(CCCC(CCCC(CCCC(CCCC(CCCl)Cl)Cl)Cl)Cl)Cl)Cl	pubchem_smiles	1	0	0	0	0	0	0	0	1	0	0	0	0	0	0	0	1	0	0	0	1	polyhalogenated aliphatic chains		1	low	0	0	0.897926
DTXSID1074252	109678333	109678-33-3	1-Propanol, 3,3'-oxybis[2,2-bis(bromomethyl)-	C10H18Br4O3	OCC(CBr)(CBr)COCC(CO)(CBr)CBr	qsar_ready_smiles	0	0	0	1	1	0	0	0	1	0	1	0	0	0	1	0	1	0	0	0	1	polyhalogenated aliphatic chains		5	high	1	0	0.705582
DTXSID301016681	114955214	114955-21-4	diethyl (4,6-dichloro-1,3,5-triazin-2-yl)phosphonate	C7H10Cl2N3O3P	CCOP(=O)(OCC)C1=NC(Cl)=NC(Cl)=N1	qsar_ready_smiles	0	0	0	1	0	0	0	0	0	0	0	0	0	0	0	0	1	0	0	0	1	polyhalogenated triazines		1	low	1	0	0.917275
DTXSID80151024	115245073	115245-07-3	1,1'-Biphenyl, 2,4,5-tribromo-	C12H7Br3	BrC1=CC(Br)=C(Br)C=C1C1=CC=CC=C1	qsar_ready_smiles	0	0	0	1	0	1	0	0	0	1	0	0	0	0	0	0	1	0	0	0	1	polyhalogenated benzenes		3	med	1	0	0.939784
DTXSID50702527	116995325	116995-32-5	1,2,4,5-Tetrabromo-3-(2,4,6-tribromophenoxy)benzene	C12H3Br7O	BrC1=CC(Br)=C(OC2=C(Br)C(Br)=CC(Br)=C2Br)C(Br)=C1	qsar_ready_smiles	0	0	1	0	0	1	0	0	0	0	0	0	0	0	1	0	1	0	0	0	1	polyhalogenated diphenyl ethers		2	med	0	1	0.975796
DTXSID00879950	116995336	116995-33-6	BDE-147	C12H4Br6O	BrC1=CC(Br)=C(OC2=C(Br)C(Br)=CC(Br)=C2Br)C=C1	qsar_ready_smiles	0	0	1	0	0	1	0	0	0	0	0	0	0	0	0	0	1	0	0	0	1	polyhalogenated diphenyl ethers		1	low	0	0	0.960251
DTXSID50448655	117948637	117948-63-7	Benzene, 1,2,3,5-tetrabromo-4-(2,4,6-tribromophenoxy)-	C12H3Br7O	BrC1=CC(Br)=C(OC2=C(Br)C(Br)=C(Br)C=C2Br)C(Br)=C1	qsar_ready_smiles	0	0	0	0	0	1	0	0	0	0	0	0	0	0	1	0	1	0	0	0	1	polyhalogenated diphenyl ethers		2	med	0	1	0.983959
DTXSID9074775	117964213	117964-21-3	BDE-197	C12H2Br8O	BrC1=CC(Br)=C(OC2=C(Br)C(Br)=C(Br)C=C2Br)C(Br)=C1Br	qsar_ready_smiles	0	0	0	0	0	1	0	0	0	0	0	1	0	0	1	0	1	0	0	0	1	polyhalogenated diphenyl ethers		3	med	0	1	0.983959
DTXSID60152372	119264594	119264-59-4	1,1'-Biphenyl, 2,2',3,3',4,4',6,6'-octabromo-	C12H2Br8	BrC1=CC(Br)=C(Br)C(Br)=C1C1=C(Br)C(Br)=C(Br)C=C1Br	qsar_ready_smiles	0	0	1	0	0	0	0	0	0	0	0	0	0	0	1	0	1	0	0	0	1	polyhalogenated benzenes		1	low	0	1	0.969686
DTXSID20152373	119264607	119264-60-7	2,2',3,3',4,5',6,6'-Octabromobiphenyl	C12H2Br8	BrC1=CC(Br)=C(Br)C(=C1Br)C1=C(Br)C(Br)=C(Br)C=C1Br	qsar_ready_smiles	0	0	1	0	0	0	0	0	0	0	0	0	0	0	1	0	1	0	0	0	1	polyhalogenated benzenes		1	low	0	1	0.969686
DTXSID80152374	119264618	119264-61-8	2,2',3,4,4',5,6,6'-Octabromobiphenyl	C12H2Br8	BrC1=CC(Br)=C(C(Br)=C1)C1=C(Br)C(Br)=C(Br)C(Br)=C1Br	qsar_ready_smiles	0	0	1	0	0	0	0	0	0	0	0	0	0	0	1	0	1	0	0	0	1	polyhalogenated benzenes		1	low	0	1	0.969686
DTXSID40873533	119264629	119264-62-9	2,2',3,3',4,4',5,6,6'-Nonabromo-1,1'-biphenyl	C12HBr9	BrC1=CC(Br)=C(Br)C(Br)=C1C1=C(Br)C(Br)=C(Br)C(Br)=C1Br	qsar_ready_smiles	0	0	0	0	0	0	0	0	1	0	0	0	0	0	1	0	1	0	0	0	1	polyhalogenated benzenes		2	med	0	0	0.969686
DTXSID40152375	119264630	119264-63-0	2,2',3,3',4,5,5',6,6'-Nonobromobiphenyl	C12HBr9	BrC1=CC(Br)=C(Br)C(=C1Br)C1=C(Br)C(Br)=C(Br)C(Br)=C1Br	qsar_ready_smiles	0	0	0	0	0	0	0	0	1	0	0	0	0	0	1	0	1	0	0	0	1	polyhalogenated benzenes		2	med	0	1	0.969686
DTXSID701014956	121839529	121839-52-9	4,4'-(1-Methylethylidene)bisphenol tetrabromo deriv.				0	0	0	1	0	0	0	0	0	0	0	0	0	0	0	0	0	0	1	0	1			1	low	0	0	0
DTXSID401016703	125512870	125512-87-0	Hexabromohexane		C(C(C(C(C(CBr)Br)Br)Br)Br)Br	pubchem_smiles	0	0	0	0	1	0	0	0	0	0	0	0	0	0	0	0	1	0	0	0	1	polyhalogenated aliphatic chains		1	low	0	0	0.938297
DTXSID1029095	125997208	125997-20-8	Phosphoric acid, mixed 3-bromo-2,2-dimethylpropyl and 2-bromoethyl and 2-chloroethyl esters	C9H18Br2ClO4P			1	0	0	0	1	0	0	1	1	0	0	0	0	0	1	0	1	0	0	0	1	polyhalogenated organophosphates		4	high	0	1	0
DTXSID9029855	125997219	125997-21-9	Phosphoric trichloride, polymer with 1,3-benzenediol, phenyl ester				0	0	0	0	1	1	0	0	0	0	0	0	1	0	1	0	0	0	1	0	1		polymeric	4	high	0	0	0
DTXSID00873771	134237506	134237-50-6	(+/-)-α-Hexabromocyclododecane	C12H18Br6	BrC1CCC(Br)C(Br)CCC(Br)C(Br)CCC1Br	qsar_ready_smiles	0	0	0	1	0	1	0	0	0	1	0	1	0	0	1	0	1	0	0	0	1	polyhalogenated alicycles		5	high	1	0	0.808216
DTXSID60873772	134237517	134237-51-7	(+/-)-beta-Hexabromocyclododecane	C12H18Br6	BrC1CCC(Br)C(Br)CCC(Br)C(Br)CCC1Br	qsar_ready_smiles	0	0	0	1	0	1	0	0	0	1	0	1	0	0	1	0	1	0	0	0	1	polyhalogenated alicycles		5	high	1	0	0.808216
DTXSID20873773	134237528	134237-52-8	(+/-)-gamma-Hexabromocyclododecane	C12H18Br6	BrC1CCC(Br)C(Br)CCC(Br)C(Br)CCC1Br	qsar_ready_smiles	0	0	0	1	0	1	0	0	0	1	0	1	0	0	1	0	1	0	0	0	1	polyhalogenated alicycles		5	high	1	0	0.808216
DTXSID10872775	135229480	135229-48-0	Brominated epoxy resin end-capped with tribromophenol				0	0	0	1	1	1	1	0	0	0	0	0	0	0	1	1	0	0	1	0	1			6	high	0	0	0
DTXSID501016863	135821033	135821-03-3	DeChlordane Plus (syn isomer)		ClC1=C(Cl)C2(Cl)C3CCC4C(CCC3C1(Cl)C2(Cl)Cl)C1(Cl)C(Cl)=C(Cl)C4(Cl)C1(Cl)Cl	qsar_ready_smiles	0	0	0	0	0	0	0	0	0	0	0	0	0	0	1	0	1	0	0	0	1	polyhalogenated carbocycles		1	low	0	0	0.901547
DTXSID201016864	135821748	135821-74-8	anti-Dechlorane Plus	C18H12Cl12	ClC1=C(Cl)C2(Cl)C3CCC4C(CCC3C1(Cl)C2(Cl)Cl)C1(Cl)C(Cl)=C(Cl)C4(Cl)C1(Cl)Cl	qsar_ready_smiles	0	0	0	0	0	0	0	0	0	0	0	0	0	0	1	0	1	0	0	0	1	polyhalogenated carbocycles		1	low	0	0	0.901547
DTXSID201016676	138257188	138257-18-8	(-)-beta-Hexabromocyclododecane	C12H18Br6	BrC1CCC(Br)C(Br)CCC(Br)C(Br)CCC1Br	qsar_ready_smiles	0	0	0	1	0	0	0	0	0	1	0	0	0	0	0	0	1	0	0	0	1	polyhalogenated alicycles		2	med	1	0	0.808216
DTXSID501016675	138257199	138257-19-9	(+)-alpha-Hexabromocyclododecane	C12H18Br6	BrC1CCC(Br)C(Br)CCC(Br)C(Br)CCC1Br	qsar_ready_smiles	0	0	0	1	0	0	0	0	0	1	0	0	0	0	1	0	1	0	0	0	1	polyhalogenated alicycles		3	med	1	0	0.808216
DTXSID70872776	138265880	138265-88-0	Zinc Borate 2335		B12OB(O1)O2.B12OB(O1)O2.B12OB(O1)O2.B12OB(O1)O2.B12OB(O1)O2.B12OB(O1)O2.O.O.O.O.O.O.O.[OH-].[OH-].[OH-].[OH-].[Zn].[Zn].[Zn].[Zn]	pubchem_smiles	0	0	0	1	0	0	0	0	0	0	0	0	0	0	0	0	0	0	0	1	1			1	low	0	0	0.791406
DTXSID60108450	139189303	139189-30-3	Phosphoric acid, P,P'-1,3-phenylene P,P,P',P'-tetrakis(2,6-dimethylphenyl) ester	C38H40O8P2	CC1=CC=CC(C)=C1OP(=O)(OC1=CC(OP(=O)(OC2=C(C)C=CC=C2C)OC2=C(C)C=CC=C2C)=CC=C1)OC1=C(C)C=CC=C1C	qsar_ready_smiles	0	0	0	0	0	1	0	0	0	0	0	0	0	1	1	0	0	1	0	0	1			3	med	0	0	0.876725
DTXSID001017111	139638587	139638-58-7	End capped and partially end capped brominated epoxy oligomer				0	0	0	0	0	0	0	1	0	0	0	0	0	0	1	0	0	0	1	0	1		polymeric	2	med	0	0	0
DTXSID50577712	147217718	147217-71-8	1-Bromo-2-(4-bromophenoxy)benzene	C12H8Br2O	BrC1=CC=C(OC2=CC=CC=C2Br)C=C1	qsar_ready_smiles	0	0	0	0	0	1	0	0	0	0	0	0	0	0	1	0	1	0	0	0	1	polyhalogenated diphenyl ethers		2	med	0	1	0.858475
DTXSID20879851	147217729	147217-72-9	BDE-6	C12H8Br2O	BrC1=CC(OC2=CC=CC=C2Br)=CC=C1	qsar_ready_smiles	0	0	1	0	0	1	0	0	0	0	0	0	0	0	0	0	1	0	0	0	1	polyhalogenated diphenyl ethers		1	low	0	1	0.886745
DTXSID00879854	147217730	147217-73-0	BDE-19	C12H7Br3O	BrC1=CC=CC=C1OC1=C(Br)C=CC=C1Br	qsar_ready_smiles	0	0	1	0	0	1	0	0	0	0	0	0	0	0	0	0	1	0	0	0	1	polyhalogenated diphenyl ethers		1	low	0	0	0.913979
DTXSID80772293	147217741	147217-74-1	1,2-Dibromo-3-(2-bromophenoxy)benzene	C12H7Br3O	BrC1=CC=CC(OC2=CC=CC=C2Br)=C1Br	qsar_ready_smiles	0	0	1	0	0	1	0	0	0	0	0	0	0	0	0	0	1	0	0	0	1	polyhalogenated diphenyl ethers		1	low	0	1	0.920868
DTXSID40872703	147217752	147217-75-2	2,2',4-Tribromodiphenyl ether	C12H7Br3O	BrC1=CC(Br)=C(OC2=CC=CC=C2Br)C=C1	qsar_ready_smiles	0	0	0	0	0	1	0	0	0	0	0	1	0	0	1	0	1	0	0	0	1	polyhalogenated diphenyl ethers		3	med	0	0	0.918378
DTXSID60879855	147217763	147217-76-3	BDE-20	C12H7Br3O	BrC1=CC=CC(OC2=CC=CC(Br)=C2Br)=C1	qsar_ready_smiles	0	0	1	0	0	1	0	0	0	0	0	0	0	0	0	0	1	0	0	0	1	polyhalogenated diphenyl ethers		1	low	0	0	0.920868
DTXSID10577713	147217774	147217-77-4	2,4-Dibromo-1-(3-bromophenoxy)benzene	C12H7Br3O	BrC1=CC(Br)=C(OC2=CC(Br)=CC=C2)C=C1	qsar_ready_smiles	0	0	1	0	0	1	0	0	0	0	0	0	0	0	0	0	1	0	0	0	1	polyhalogenated diphenyl ethers		1	low	0	0	0.942694
DTXSID5024348	147217785	147217-78-5	2',3,4-Tribromodiphenyl ether	C12H7Br3O	BrC1=CC=C(OC2=C(Br)C=CC=C2)C=C1Br	qsar_ready_smiles	0	0	0	0	0	1	0	0	0	0	0	0	0	0	1	0	1	0	0	0	1	polyhalogenated diphenyl ethers		2	med	0	0	0.927619
DTXSID00583560	147217796	147217-79-6	1,3-Dibromo-5-(3-bromophenoxy)benzene	C12H7Br3O	BrC1=CC=CC(OC2=CC(Br)=CC(Br)=C2)=C1	qsar_ready_smiles	0	0	1	0	0	1	0	0	0	0	0	0	0	0	0	0	1	0	0	0	1	polyhalogenated diphenyl ethers		1	low	0	0	0.889054
DTXSID90879863	147217809	147217-80-9	BDE-35	C12H7Br3O	BrC1=CC(OC2=CC=C(Br)C(Br)=C2)=CC=C1	qsar_ready_smiles	0	0	1	0	0	1	0	0	0	0	0	0	0	0	0	0	1	0	0	0	1	polyhalogenated diphenyl ethers		1	low	0	0	0.883673
DTXSID50879864	147217810	147217-81-0	BDE-37	C12H7Br3O	BrC1=CC=C(OC2=CC=C(Br)C(Br)=C2)C=C1	qsar_ready_smiles	0	0	1	0	0	1	0	0	0	0	0	0	0	0	0	0	1	0	0	0	1	polyhalogenated diphenyl ethers		1	low	0	0	0.883673
DTXSID90872778	147768396	147768-39-6	3,3'-[(2-Methylpropyl)phosphoryl]di(propan-1-ol)	C10H23O3P	CC(C)CP(=O)(CCCO)CCCO	qsar_ready_smiles	0	0	0	0	1	0	0	0	0	0	0	0	0	0	0	0	0	1	0	0	1			1	low	0	0	0.757507
DTXSID40106732	148993991	148993-99-1	Benzene, ethenyl-, ar-bromo derivs., homopolymers				0	0	0	1	0	0	1	1	0	0	0	0	0	0	0	0	0	0	1	0	1		polymeric	3	med	0	0	0
DTXSID20108830	155613937	155613-93-7	1H-Indene, 2,3-dihydro-1,1,3-trimethyl-3-phenyl-, octabromo deriv.		CC1(C2(C(=C(C(=C(C2(Br)Br)Br)Br)Br)C(C1(Br)Br)(C)C3=CC=CC=C3)Br)C	pubchem_smiles	0	0	0	1	0	0	1	1	0	1	1	0	0	0	1	0	1	0	0	0	1	polyhalogenated benzene alicycles		6	high	1	0	0.903617
DTXSID60477017	155999954	155999-95-4	2,4,6-Tribromodiphenyl ether	C12H7Br3O	BrC1=CC(Br)=C(OC2=CC=CC=C2)C(Br)=C1	qsar_ready_smiles	0	0	0	0	0	1	0	0	0	0	0	0	0	0	1	0	1	0	0	0	1	polyhalogenated diphenyl ethers		2	med	0	1	0.958635
DTXSID80872782	158725441	158725-44-1	4,4'(1Methylethylidene)bis[2,6dibromophenol] polymer with (chloromethyl)oxirane and 2,4,6tribromophenol				0	0	0	0	0	0	1	0	0	0	0	0	0	0	1	0	0	0	1	0	1		polymeric	2	med	0	0	0
DTXSID701016683	168434455	168434-45-5	2,​4,​6-​tribromo-​3-​(tetrabromopentadecy​l)​-phenol				0	0	0	1	0	1	1	0	0	1	0	0	0	1	1	0	1	0	0	0	1	polyhalogenated benzene aliphatics and functionalized		6	high	1	0	0
DTXSID80776039	169102572	169102-57-2	(1R,2S,5S,6S,9S,10R)-1,2,5,6,9,10-Hexabromocyclododecane	C12H18Br6	BrC1CCC(Br)C(Br)CCC(Br)C(Br)CCC1Br	qsar_ready_smiles	0	0	0	1	0	0	0	0	0	1	0	0	0	0	0	0	1	0	0	0	1	polyhalogenated alicycles		2	med	1	0	0.808216
DTXSID50107134	171091068	171091-06-8	Benzene, ethenyl-, ar-bromo derivs., polymers with propene, graft				0	0	0	0	0	0	0	1	1	0	0	0	0	0	0	1	0	0	1	0	1		polymeric	3	med	0	0	0
DTXSID70565813	171977449	171977-44-9	2,4-Dibromo-1-phenoxybenzene	C12H8Br2O	BrC1=CC(Br)=C(OC2=CC=CC=C2)C=C1	qsar_ready_smiles	0	0	1	0	0	1	0	0	0	0	0	0	0	0	0	0	1	0	0	0	1	polyhalogenated diphenyl ethers		1	low	0	1	0.932772
DTXSID80107228	181028795	181028-79-5	Phosphoric trichloride, reaction products with bisphenol A and phenol		CC(C)(C1=CC=C(C=C1)OP(=O)(O)O)C2=CC=C(C=C2)OP(=O)(O)O	pubchem_smiles	0	0	0	0	1	1	0	1	0	0	0	0	0	0	1	0	0	0	1	0	1			4	high	0	0	0.917871
DTXSID4052685	182346210	182346-21-0	2,2',3,4,4'-Pentabromodiphenyl ether	C12H5Br5O	BrC1=CC=C(OC2=C(Br)C(Br)=C(Br)C=C2)C(Br)=C1	qsar_ready_smiles	0	0	0	0	0	1	0	0	0	0	0	1	0	0	1	0	1	0	0	0	1	polyhalogenated diphenyl ethers		3	med	0	1	0.973155
DTXSID60550652	182677287	182677-28-7	1,1'-Oxybis(2,3,4-tribromobenzene)	C12H4Br6O	BrC1=C(Br)C(Br)=C(OC2=C(Br)C(Br)=C(Br)C=C2)C=C1	qsar_ready_smiles	0	0	0	0	0	1	0	0	0	0	0	0	0	0	1	0	1	0	0	0	1	polyhalogenated diphenyl ethers		2	med	0	1	0.973155
DTXSID60872265	182677301	182677-30-1	2,2',3,4,4',5'-Hexabromodiphenyl Ether	C12H4Br6O	BrC1=CC=C(OC2=CC(Br)=C(Br)C=C2Br)C(Br)=C1Br	qsar_ready_smiles	0	0	0	0	0	1	0	0	0	0	0	0	0	0	1	0	1	0	0	0	1	polyhalogenated diphenyl ethers		2	med	0	0	0.975126
DTXSID9052686	183658277	183658-27-7	2-Ethylhexyl 2,3,4,5-tetrabromobenzoate	C15H18Br4O2	CCCCC(CC)COC(=O)C1=C(Br)C(Br)=C(Br)C(Br)=C1	qsar_ready_smiles	0	0	0	1	1	1	1	0	0	1	1	1	1	1	1	0	1	0	0	0	1	polyhalogenated phthalates/benzoates/imides	OFR	10	high	1	0	0.885827
DTXSID70107934	184538587	184538-58-7	Phosphoric acid, triethyl ester, polymer with oxirane and phosphorus oxide (P2O5)		CCOP(=O)(OCC)OCC.C1CO1.O=P(=O)OP(=O)=O	pubchem_smiles	0	0	0	0	1	1	0	0	0	0	0	0	1	0	0	0	0	0	1	0	1		polymeric	3	med	0	0	0.831396
DTXSID40616285	189084579	189084-57-9	1,3-Dibromo-2-(2,4-dibromophenoxy)benzene	C12H6Br4O	BrC1=CC(Br)=C(OC2=C(Br)C=CC=C2Br)C=C1	qsar_ready_smiles	0	0	0	0	0	1	0	0	0	0	0	0	0	0	0	0	1	0	0	0	1	polyhalogenated diphenyl ethers		1	low	0	1	0.918378
DTXSID50879965	189084580	189084-58-0	BDE-166	C12H4Br6O	BrC1=CC=C(OC2=C(Br)C(Br)=C(Br)C(Br)=C2Br)C=C1	qsar_ready_smiles	0	0	1	0	0	1	0	0	0	0	0	0	0	0	0	0	1	0	0	0	1	polyhalogenated diphenyl ethers		1	low	0	0	0.98377
DTXSID40477015	189084591	189084-59-1	3,4-Dibromodiphenyl ether	C12H8Br2O	BrC1=C(Br)C=C(OC2=CC=CC=C2)C=C1	qsar_ready_smiles	0	0	1	0	0	1	0	0	0	0	0	0	0	0	0	0	1	0	0	0	1	polyhalogenated diphenyl ethers		1	low	0	1	0.906616
DTXSID70879861	189084604	189084-60-4	BDE-32	C12H7Br3O	BrC1=CC=C(OC2=C(Br)C=CC=C2Br)C=C1	qsar_ready_smiles	0	0	1	0	0	1	0	0	0	0	0	0	0	0	0	0	1	0	0	0	1	polyhalogenated diphenyl ethers		1	low	0	0	0.918378
DTXSID9052688	189084615	189084-61-5	2,3',4,4'-Tetrabromodiphenyl ether	C12H6Br4O	BrC1=CC(Br)=C(OC2=CC(Br)=C(Br)C=C2)C=C1	qsar_ready_smiles	0	0	0	0	0	1	0	0	0	0	0	1	0	0	1	0	1	0	0	0	1	polyhalogenated diphenyl ethers		3	med	0	1	0.960609
DTXSID90873922	189084626	189084-62-6	2,3',4',6-Tetrabromodiphenyl Ether	C12H6Br4O	BrC1=CC=CC(Br)=C1OC1=CC(Br)=C(Br)C=C1	qsar_ready_smiles	0	0	0	0	0	1	0	0	0	0	0	0	0	0	1	0	1	0	0	0	1	polyhalogenated diphenyl ethers		2	med	0	0	0.960609
DTXSID60879895	189084637	189084-63-7	BDE-75	C12H6Br4O	BrC1=CC=C(OC2=C(Br)C=C(Br)C=C2Br)C=C1	qsar_ready_smiles	0	0	1	0	0	1	0	0	0	0	0	0	0	0	0	0	1	0	0	0	1	polyhalogenated diphenyl ethers		1	low	0	0	0.950471
DTXSID4052689	189084648	189084-64-8	2,2',4,4',6-Pentabromodiphenyl ether	C12H5Br5O	BrC1=CC=C(OC2=C(Br)C=C(Br)C=C2Br)C(Br)=C1	qsar_ready_smiles	0	0	0	1	0	1	0	0	0	1	1	1	0	0	1	0	1	0	0	0	1	polyhalogenated diphenyl ethers		6	high	1	0	0.950471
DTXSID80548894	189084659	189084-65-9	1,2,3,4,5-Pentabromo-6-phenoxybenzene	C12H5Br5O	BrC1=C(Br)C(Br)=C(OC2=CC=CC=C2)C(Br)=C1Br	qsar_ready_smiles	0	0	1	0	0	1	0	0	0	0	0	0	0	0	0	0	1	0	0	0	1	polyhalogenated diphenyl ethers		1	low	0	1	0.985559
DTXSID50873928	189084660	189084-66-0	2,3',4,4',6-Pentabromodiphenyl Ether	C12H5Br5O	BrC1=CC(Br)=C(OC2=CC(Br)=C(Br)C=C2)C(Br)=C1	qsar_ready_smiles	0	0	0	0	0	1	0	0	0	0	0	0	0	0	1	0	1	0	0	0	1	polyhalogenated diphenyl ethers		2	med	0	0	0.975756
DTXSID60583561	189084671	189084-67-1	1,2,3,4,5-Pentabromo-6-(2,4-dibromophenoxy)benzene	C12H3Br7O	BrC1=CC(Br)=C(OC2=C(Br)C(Br)=C(Br)C(Br)=C2Br)C=C1	qsar_ready_smiles	0	0	0	1	0	1	0	0	0	0	0	0	0	0	0	0	1	0	0	0	1	polyhalogenated diphenyl ethers		2	med	1	0	0.98377
DTXSID80872267	189084682	189084-68-2	2,3,3',4,4',5,6-Heptabromodiphenyl Ether	C12H3Br7O	BrC1=CC=C(OC2=C(Br)C(Br)=C(Br)C(Br)=C2Br)C=C1Br	qsar_ready_smiles	0	0	0	0	0	1	0	0	0	0	0	0	0	0	1	0	1	0	0	0	1	polyhalogenated diphenyl ethers		2	med	0	0	0.98377
DTXSID10107312	191680816	191680-81-6	1,3-Propanediamine, N1,N1'-1,2-ethanediylbis-, reaction products with cyclohexane and peroxidized N-butyl-2,2,6,6-tetramethyl-4-piperidinamine-2,4,6-trichloro-1,3,5-triazine reaction products				0	0	0	1	1	1	0	0	0	0	0	0	0	0	0	0	0	0	1	0	1			3	med	0	0	0
DTXSID701029840	198126862	198126-86-2	Tetrabromo trichloromethyl benzene		C1=C(C(=C(C(=C1Br)Br)Br)Br)C(Cl)(Cl)Cl	pubchem_smiles	0	0	0	0	0	0	0	0	0	0	0	0	0	0	0	1	1	0	0	0	1	polyhalogenated benzenes	Check CAS/Dashbaord. Pubchem ID is 23374640	1	low	0	0	0.9627
DTXSID901010948	198840652	198840-65-2	Tetradecane, chloro derivs.				0	0	0	0	1	0	0	0	0	0	0	0	0	0	0	0	0	0	1	0	1			1	low	0	0	0
DTXSID3052692	207122154	207122-15-4	2,2',4,4',5,6'-Hexabromodiphenyl ether	C12H4Br6O	BrC1=CC(Br)=C(OC2=CC(Br)=C(Br)C=C2Br)C(Br)=C1	qsar_ready_smiles	0	0	0	1	0	1	0	0	0	1	1	1	0	0	1	0	1	0	0	0	1	polyhalogenated diphenyl ethers		6	high	1	0	0.975796
DTXSID8052693	207122165	207122-16-5	2,2',3,4,4',5',6-Heptabromodiphenyl ether	C12H3Br7O	BrC1=CC(Br)=C(OC2=C(Br)C=C(Br)C(Br)=C2Br)C=C1Br	qsar_ready_smiles	0	0	0	1	0	1	0	0	0	1	1	1	0	0	1	0	1	0	0	0	1	polyhalogenated diphenyl ethers		6	high	1	0	0.983959
DTXSID101016704	214216087	214216-08-7	bis(2,3-dibromopropyl) 3,4,5,6-tetrabromobenzene-1,2-dicarboxylate	C14H10Br8O4	BrCC(Br)COC(=O)C1=C(C(=O)OCC(Br)CBr)C(Br)=C(Br)C(Br)=C1Br	qsar_ready_smiles	0	0	0	0	1	0	0	0	0	0	0	0	0	0	0	0	1	0	0	0	1	polyhalogenated phthalates/benzoates/imides		1	low	0	0	0.956195
DTXSID00879859	218304360	218304-36-0	BDE-24	C12H7Br3O	BrC1=C(Br)C(OC2=CC=CC=C2)=C(Br)C=C1	qsar_ready_smiles	0	0	1	0	0	1	0	0	0	0	0	0	0	0	0	0	1	0	0	0	1	polyhalogenated diphenyl ethers		1	low	0	0	0.966759
DTXSID40872788	218768844	218768-84-4	Melapur 200 1,3,5-Triazine-2,4,6-triamine, phosphate		C1(=NC(=NC(=N1)N)N)N.OP(=O)(O)O	pubchem_smiles	0	0	0	0	0	1	0	0	1	0	1	0	0	0	1	1	0	1	0	1	1			5	high	0	0	0.91635
DTXSID00872789	225789388	225789-38-8	Aluminum diethylphosphinate	C12H30AlO6P3	CCP(O)(=O)CC	qsar_ready_smiles	0	0	0	0	1	1	0	0	0	0	0	0	0	0	1	1	0	0	0	1	1		inorganic	4	high	0	0	0.855979
DTXSID90873927	243982823	243982-82-3	2,2',4,5'-Tetrabromodiphenyl Ether	C12H6Br4O	BrC1=CC(Br)=C(OC2=C(Br)C=CC(Br)=C2)C=C1	qsar_ready_smiles	0	0	0	0	0	1	0	0	0	0	0	0	0	0	1	0	1	0	0	0	1	polyhalogenated diphenyl ethers		2	med	0	0	0.938696
DTXSID30879943	243982834	243982-83-4	BDE-140	C12H4Br6O	BrC1=CC(Br)=C(OC2=C(Br)C(Br)=C(Br)C=C2)C(Br)=C1	qsar_ready_smiles	0	0	1	0	0	1	0	0	0	0	0	0	0	0	0	0	1	0	0	0	1	polyhalogenated diphenyl ethers		1	low	0	0	0.982102
DTXSID50879980	259087359	259087-35-9	BDE-189	C12H3Br7O	BrC1=CC(OC2=CC(Br)=C(Br)C(Br)=C2Br)=CC(Br)=C1Br	qsar_ready_smiles	0	0	1	0	0	1	0	0	0	0	0	0	0	0	0	0	1	0	0	0	1	polyhalogenated diphenyl ethers		1	low	0	0	0.975126
DTXSID40109400	284685456	284685-45-6	Phosphinic acid, P,P-diethyl-, zinc salt (2:1)		CCP(=O)(CC)[O-].CCP(=O)(CC)[O-].[Zn+2]	pubchem_smiles	0	0	0	0	1	0	0	0	0	0	0	0	0	0	0	0	0	0	1	1	1			1	low	0	0	0.902223
DTXSID601018498	288260424	288260-42-4	Alkanes, C22-30, chloro				1	0	0	0	1	0	0	0	0	0	0	0	0	0	0	0	1	0	0	0	1	polyhalogenated aliphatic chains		1	low	0	0	0
DTXSID60879890	327185091	327185-09-1	BDE-69	C12H6Br4O	BrC1=CC=CC(OC2=C(Br)C=C(Br)C=C2Br)=C1	qsar_ready_smiles	0	0	1	0	0	1	0	0	0	0	0	0	0	0	0	0	1	0	0	0	1	polyhalogenated diphenyl ethers		1	low	0	0	0.965267
DTXSID20477018	327185115	327185-11-5	Benzene, 1,2,3-tribromo-4-(2,3-dibromophenoxy)-	C12H5Br5O	BrC1=CC=CC(OC2=C(Br)C(Br)=C(Br)C=C2)=C1Br	qsar_ready_smiles	0	0	1	0	0	1	0	0	0	0	0	0	0	0	0	0	1	0	0	0	1	polyhalogenated diphenyl ethers		1	low	0	1	0.973155
DTXSID90879969	327185137	327185-13-7	BDE-170	C12H3Br7O	BrC1=CC=C(OC2=C(Br)C(Br)=C(Br)C(Br)=C2)C(Br)=C1Br	qsar_ready_smiles	0	0	1	0	0	1	0	0	0	0	0	0	0	0	0	0	1	0	0	0	1	polyhalogenated diphenyl ethers		1	low	0	0	0.975126
DTXSID20783707	337513538	337513-53-8	1,3-Dibromo-2-(3-bromophenoxy)benzene	C12H7Br3O	BrC1=CC=CC(OC2=C(Br)C=CC=C2Br)=C1	qsar_ready_smiles	0	0	1	0	0	1	0	0	0	0	0	0	0	0	0	0	1	0	0	0	1	polyhalogenated diphenyl ethers		1	low	0	1	0.9399
DTXSID10879865	337513549	337513-54-9	BDE-38	C12H7Br3O	BrC1=CC(OC2=CC=CC=C2)=CC(Br)=C1Br	qsar_ready_smiles	0	0	1	0	0	1	0	0	0	0	0	0	0	0	0	0	1	0	0	0	1	polyhalogenated diphenyl ethers		1	low	0	0	0.964482
DTXSID40879873	337513550	337513-55-0	BDE-48	C12H6Br4O	BrC1=CC(Br)=C(Br)C=C1OC1=C(Br)C=CC=C1	qsar_ready_smiles	0	0	1	0	0	1	0	0	0	0	0	0	0	0	0	0	1	0	0	0	1	polyhalogenated diphenyl ethers		1	low	0	0	0.960251
DTXSID10879860	337513561	337513-56-1	BDE-29	C12H7Br3O	BrC1=CC(Br)=C(Br)C=C1OC1=CC=CC=C1	qsar_ready_smiles	0	0	1	0	0	1	0	0	0	0	0	0	0	0	0	0	1	0	0	0	1	polyhalogenated diphenyl ethers		1	low	0	0	0.966857
DTXSID80879852	337513663	337513-66-3	BDE-9	C12H8Br2O	BrC1=CC=C(Br)C(OC2=CC=CC=C2)=C1	qsar_ready_smiles	0	0	1	0	0	1	0	0	0	0	0	0	0	0	0	0	1	0	0	0	1	polyhalogenated diphenyl ethers		1	low	0	0	0.904705
DTXSID20879856	337513674	337513-67-4	BDE-21	C12H7Br3O	BrC1=CC=C(OC2=CC=CC=C2)C(Br)=C1Br	qsar_ready_smiles	0	0	1	0	0	1	0	0	0	0	0	0	0	0	0	0	1	0	0	0	1	polyhalogenated diphenyl ethers		1	low	0	0	0.97621
DTXSID30879867	337513685	337513-68-5	BDE-41	C12H6Br4O	BrC1=CC=CC=C1OC1=C(Br)C(Br)=C(Br)C=C1	qsar_ready_smiles	0	0	1	0	0	1	0	0	0	0	0	0	0	0	0	0	1	0	0	0	1	polyhalogenated diphenyl ethers		1	low	0	0	0.973155
DTXSID7074749	337513721	337513-72-1	BDE-203	C12H2Br8O	BrC1=CC(Br)=C(Br)C=C1OC1=C(Br)C(Br)=C(Br)C(Br)=C1Br	qsar_ready_smiles	0	0	0	0	0	1	0	0	0	0	0	1	0	0	1	0	1	0	0	0	1	polyhalogenated diphenyl ethers		3	med	0	1	0.98377
DTXSID60783706	337513754	337513-75-4	1,4-Dibromo-2-(3-bromophenoxy)benzene	C12H7Br3O	BrC1=CC(OC2=CC(Br)=CC=C2)=C(Br)C=C1	qsar_ready_smiles	0	0	1	0	0	1	0	0	0	0	0	0	0	0	0	0	1	0	0	0	1	polyhalogenated diphenyl ethers		1	low	0	1	0.881438
DTXSID70879866	337513776	337513-77-6	BDE-40	C12H6Br4O	BrC1=CC=CC(OC2=CC=CC(Br)=C2Br)=C1Br	qsar_ready_smiles	0	0	1	0	0	1	0	0	0	0	0	0	0	0	0	0	1	0	0	0	1	polyhalogenated diphenyl ethers		1	low	0	0	0.920868
DTXSID00879879	337513823	337513-82-3	BDE-57	C12H6Br4O	BrC1=CC=CC(OC2=CC(Br)=CC(Br)=C2Br)=C1	qsar_ready_smiles	0	0	1	0	0	1	0	0	0	0	0	0	0	0	0	0	1	0	0	0	1	polyhalogenated diphenyl ethers		1	low	0	0	0.959707
DTXSID60109402	359406896	359406-89-6	Phosphonium, tetrakis(hydroxymethyl)-, chloride (1:1), reaction products with 1-tetradecanamine and urea		C(O)[P+](CO)(CO)CO.[Cl-]	pubchem_smiles	0	1	0	0	1	0	0	0	0	0	0	0	0	0	0	0	0	1	0	0	1		mixture, cation/anion Does not contain carbon-halogen bond	1	low	0	0	0.814776
DTXSID801016705	363626500	363626-50-0	Bis(polyoxyethylene) methylphosphonate				0	0	0	0	1	0	0	0	0	0	0	0	0	0	0	0	0	1	0	0	1			1	low	0	0	0
DTXSID50573491	366791324	366791-32-4	1,2,3-Tribromo-5-(3,4-dibromophenoxy)benzene	C12H5Br5O	BrC1=CC(OC2=CC(Br)=C(Br)C=C2)=CC(Br)=C1Br	qsar_ready_smiles	0	0	0	0	0	1	0	0	0	0	0	0	0	0	1	0	1	0	0	0	1	polyhalogenated diphenyl ethers		2	med	0	1	0.959305
DTXSID20879917	373594786	373594-78-6	BDE-105	C12H5Br5O	BrC1=CC=C(OC2=CC(Br)=C(Br)C=C2)C(Br)=C1Br	qsar_ready_smiles	0	0	1	0	0	1	0	0	0	0	0	0	0	0	0	0	1	0	0	0	1	polyhalogenated diphenyl ethers		1	low	0	0	0.973155
DTXSID60108955	383905859	383905-85-9	Polyphosphoric acids, compds. with piperazine				0	0	0	0	1	0	0	0	0	0	0	0	0	0	0	0	0	1	1	0	1			1	low	0	0	0
DTXSID20786910	405237856	405237-85-6	1,2,3,4-Tetrabromo-5-(3,4-dibromophenoxy)benzene	C12H4Br6O	BrC1=C(Br)C=C(OC2=CC(Br)=C(Br)C(Br)=C2Br)C=C1	qsar_ready_smiles	0	0	0	0	0	1	0	0	0	0	0	0	0	0	1	0	1	0	0	0	1	polyhalogenated diphenyl ethers		2	med	0	1	0.975126
DTXSID90785733	405237867	405237-86-7	1,2,3,4,5-Pentabromo-6-(2,5-dibromophenoxy)benzene	C12H3Br7O	BrC1=CC(OC2=C(Br)C(Br)=C(Br)C(Br)=C2Br)=C(Br)C=C1	qsar_ready_smiles	0	0	1	0	0	1	0	0	0	0	0	0	0	0	0	0	1	0	0	0	1	polyhalogenated diphenyl ethers		1	low	0	1	0.98377
DTXSID90785697	407578534	407578-53-4	1,2,3,4,5-Pentabromo-6-(3,5-dibromophenoxy)benzene	C12H3Br7O	BrC1=CC(OC2=C(Br)C(Br)=C(Br)C(Br)=C2Br)=CC(Br)=C1	qsar_ready_smiles	0	0	1	0	0	1	0	0	0	0	0	0	0	0	0	0	1	0	0	0	1	polyhalogenated diphenyl ethers		1	low	0	1	0.98377
DTXSID40879853	407606557	407606-55-7	BDE-18	C12H7Br3O	BrC1=CC(OC2=CC=CC=C2Br)=C(Br)C=C1	qsar_ready_smiles	0	0	1	0	0	1	0	0	0	0	0	0	0	0	0	0	1	0	0	0	1	polyhalogenated diphenyl ethers		1	low	0	0	0.881438
DTXSID70785695	407606579	407606-57-9	1,3-Dibromo-5-(4-bromophenoxy)benzene	C12H7Br3O	BrC1=CC=C(OC2=CC(Br)=CC(Br)=C2)C=C1	qsar_ready_smiles	0	0	1	0	0	1	0	0	0	0	0	0	0	0	0	0	1	0	0	0	1	polyhalogenated diphenyl ethers		1	low	0	1	0.901415
DTXSID00879970	407606591	407606-59-1	BDE-172	C12H3Br7O	BrC1=CC(OC2=CC(Br)=C(Br)C(Br)=C2Br)=C(Br)C(Br)=C1	qsar_ready_smiles	0	0	1	0	0	1	0	0	0	0	0	0	0	0	0	0	1	0	0	0	1	polyhalogenated diphenyl ethers		1	low	0	0	0.975126
DTXSID80879973	407606615	407606-61-5	BDE-176	C12H3Br7O	BrC1=CC=C(Br)C(OC2=C(Br)C=C(Br)C(Br)=C2Br)=C1Br	qsar_ready_smiles	0	0	1	0	0	1	0	0	0	0	0	0	0	0	0	0	1	0	0	0	1	polyhalogenated diphenyl ethers		1	low	0	0	0.983959
DTXSID30785570	417727710	417727-71-0	1,2,4-Tribromo-5-(3,5-dibromophenoxy)benzene	C12H5Br5O	BrC1=CC(OC2=CC(Br)=C(Br)C=C2Br)=CC(Br)=C1	qsar_ready_smiles	0	0	1	0	0	1	0	0	0	0	0	0	0	0	0	0	1	0	0	0	1	polyhalogenated diphenyl ethers		1	low	0	1	0.960251
DTXSID40556652	437701785	437701-78-5	2,2',3,3',4,5,5',6,6'-nonabromodiphenyl ether	C12HBr9O	BrC1=CC(Br)=C(Br)C(OC2=C(Br)C(Br)=C(Br)C(Br)=C2Br)=C1Br	qsar_ready_smiles	0	0	0	0	0	1	0	0	0	0	0	1	0	0	1	0	1	0	0	0	1	polyhalogenated diphenyl ethers		3	med	0	1	0.98377
DTXSID30451985	437701796	437701-79-6	BDE-207	C12HBr9O	BrC1=CC(Br)=C(Br)C(Br)=C1OC1=C(Br)C(Br)=C(Br)C(Br)=C1Br	qsar_ready_smiles	0	0	0	0	0	1	0	0	0	0	0	1	0	0	1	0	1	0	0	0	1	polyhalogenated diphenyl ethers		3	med	0	1	0.98377
DTXSID20879977	442690451	442690-45-1	BDE-182	C12H3Br7O	BrC1=CC(Br)=C(OC2=CC(Br)=C(Br)C(Br)=C2Br)C(Br)=C1	qsar_ready_smiles	0	0	1	0	0	1	0	0	0	0	0	0	0	0	0	0	1	0	0	0	1	polyhalogenated diphenyl ethers		1	low	0	0	0.983959
DTXSID80879857	446254155	446254-15-5	BDE-22	C12H7Br3O	BrC1=CC=C(OC2=CC=CC(Br)=C2Br)C=C1	qsar_ready_smiles	0	0	1	0	0	1	0	0	0	0	0	0	0	0	0	0	1	0	0	0	1	polyhalogenated diphenyl ethers		1	low	0	0	0.927619
DTXSID40879858	446254166	446254-16-6	BDE-23	C12H7Br3O	BrC1=CC(OC2=CC=CC=C2)=C(Br)C(Br)=C1	qsar_ready_smiles	0	0	1	0	0	1	0	0	0	0	0	0	0	0	0	0	1	0	0	0	1	polyhalogenated diphenyl ethers		1	low	0	0	0.966759
DTXSID30879862	446254177	446254-17-7	BDE-34	C12H7Br3O	BrC1=CC(OC2=C(Br)C=CC=C2)=CC(Br)=C1	qsar_ready_smiles	0	0	1	0	0	1	0	0	0	0	0	0	0	0	0	0	1	0	0	0	1	polyhalogenated diphenyl ethers		1	low	0	0	0.9399
DTXSID90879868	446254188	446254-18-8	BDE-42	C12H6Br4O	BrC1=CC=C(OC2=C(Br)C(Br)=CC=C2)C(Br)=C1	qsar_ready_smiles	0	0	1	0	0	1	0	0	0	0	0	0	0	0	0	0	1	0	0	0	1	polyhalogenated diphenyl ethers		1	low	0	0	0.960609
DTXSID50879869	446254199	446254-19-9	BDE-43	C12H6Br4O	BrC1=CC(OC2=CC=CC=C2Br)=C(Br)C(Br)=C1	qsar_ready_smiles	0	0	1	0	0	1	0	0	0	0	0	0	0	0	0	0	1	0	0	0	1	polyhalogenated diphenyl ethers		1	low	0	0	0.959707
DTXSID60879870	446254202	446254-20-2	BDE-44	C12H6Br4O	BrC1=CC=C(Br)C(OC2=C(Br)C(Br)=CC=C2)=C1	qsar_ready_smiles	0	0	1	0	0	1	0	0	0	0	0	0	0	0	0	0	1	0	0	0	1	polyhalogenated diphenyl ethers		1	low	0	0	0.917043
DTXSID20879871	446254213	446254-21-3	BDE-45	C12H6Br4O	BrC1=C(Br)C(OC2=C(Br)C=CC=C2)=C(Br)C=C1	qsar_ready_smiles	0	0	1	0	0	1	0	0	0	0	0	0	0	0	0	0	1	0	0	0	1	polyhalogenated diphenyl ethers		1	low	0	0	0.959707
DTXSID80879872	446254224	446254-22-4	BDE-46	C12H6Br4O	BrC1=CC=CC(OC2=C(Br)C=CC=C2Br)=C1Br	qsar_ready_smiles	0	0	1	0	0	1	0	0	0	0	0	0	0	0	0	0	1	0	0	0	1	polyhalogenated diphenyl ethers		1	low	0	0	0.957899
DTXSID00879874	446254235	446254-23-5	BDE-50	C12H6Br4O	BrC1=CC(Br)=C(OC2=C(Br)C=CC=C2)C(Br)=C1	qsar_ready_smiles	0	0	1	0	0	1	0	0	0	0	0	0	0	0	0	0	1	0	0	0	1	polyhalogenated diphenyl ethers		1	low	0	0	0.950471
DTXSID60879875	446254246	446254-24-6	BDE-52	C12H6Br4O	BrC1=CC(OC2=CC(Br)=CC=C2Br)=C(Br)C=C1	qsar_ready_smiles	0	0	1	0	0	1	0	0	0	0	0	0	0	0	0	0	1	0	0	0	1	polyhalogenated diphenyl ethers		1	low	0	0	0.881438
DTXSID20879876	446254257	446254-25-7	BDE-53	C12H6Br4O	BrC1=CC=C(Br)C(OC2=C(Br)C=CC=C2Br)=C1	qsar_ready_smiles	0	0	1	0	0	1	0	0	0	0	0	0	0	0	0	0	1	0	0	0	1	polyhalogenated diphenyl ethers		1	low	0	0	0.934488
DTXSID80879877	446254268	446254-26-8	BDE-54	C12H6Br4O	BrC1=CC=CC(Br)=C1OC1=C(Br)C=CC=C1Br	qsar_ready_smiles	0	0	1	0	0	1	0	0	0	0	0	0	0	0	0	0	1	0	0	0	1	polyhalogenated diphenyl ethers		1	low	0	0	0.913979
DTXSID90881108	446254279	446254-27-9	1,2,3-Tribromo-4-(3-bromophenoxy)benzene	C12H6Br4O	BrC1=CC=CC(OC2=CC=C(Br)C(Br)=C2Br)=C1	qsar_ready_smiles	0	0	1	0	0	1	0	0	0	0	0	0	0	0	0	0	1	0	0	0	1	polyhalogenated diphenyl ethers		1	low	0	0	0.973155
DTXSID40879878	446254280	446254-28-0	BDE-56	C12H6Br4O	BrC1=C(Br)C=C(OC2=CC=CC(Br)=C2Br)C=C1	qsar_ready_smiles	0	0	1	0	0	1	0	0	0	0	0	0	0	0	0	0	1	0	0	0	1	polyhalogenated diphenyl ethers		1	low	0	0	0.927619
DTXSID10879880	446254291	446254-29-1	BDE-58	C12H6Br4O	BrC1=CC(OC2=CC=CC(Br)=C2Br)=CC(Br)=C1	qsar_ready_smiles	0	0	1	0	0	1	0	0	0	0	0	0	0	0	0	0	1	0	0	0	1	polyhalogenated diphenyl ethers		1	low	0	0	0.957899
DTXSID70879881	446254304	446254-30-4	BDE-59	C12H6Br4O	BrC1=CC=CC(OC2=C(Br)C=CC(Br)=C2Br)=C1	qsar_ready_smiles	0	0	1	0	0	1	0	0	0	0	0	0	0	0	0	0	1	0	0	0	1	polyhalogenated diphenyl ethers		1	low	0	0	0.959707
DTXSID30879882	446254315	446254-31-5	BDE-60	C12H6Br4O	BrC1=CC=C(OC2=CC=C(Br)C(Br)=C2Br)C=C1	qsar_ready_smiles	0	0	1	0	0	1	0	0	0	0	0	0	0	0	0	0	1	0	0	0	1	polyhalogenated diphenyl ethers		1	low	0	0	0.973155
DTXSID90879883	446254326	446254-32-6	BDE-61	C12H6Br4O	BrC1=C(Br)C(Br)=C(Br)C(OC2=CC=CC=C2)=C1	qsar_ready_smiles	0	0	1	0	0	1	0	0	0	0	0	0	0	0	0	0	1	0	0	0	1	polyhalogenated diphenyl ethers		1	low	0	0	0.978931
DTXSID50879884	446254337	446254-33-7	BDE-62	C12H6Br4O	BrC1=CC(Br)=C(OC2=CC=CC=C2)C(Br)=C1Br	qsar_ready_smiles	0	0	1	0	0	1	0	0	0	0	0	0	0	0	0	0	1	0	0	0	1	polyhalogenated diphenyl ethers		1	low	0	0	0.986211
DTXSID10879885	446254348	446254-34-8	BDE-63	C12H6Br4O	BrC1=CC=C(OC2=CC(Br)=CC(Br)=C2Br)C=C1	qsar_ready_smiles	0	0	1	0	0	1	0	0	0	0	0	0	0	0	0	0	1	0	0	0	1	polyhalogenated diphenyl ethers		1	low	0	0	0.960251
DTXSID70879886	446254359	446254-35-9	BDE-64	C12H6Br4O	BrC1=CC=C(OC2=C(Br)C=CC(Br)=C2Br)C=C1	qsar_ready_smiles	0	0	1	0	0	1	0	0	0	0	0	0	0	0	0	0	1	0	0	0	1	polyhalogenated diphenyl ethers		1	low	0	0	0.960251
DTXSID30879887	446254360	446254-36-0	BDE-65	C12H6Br4O	BrC1=CC(Br)=C(Br)C(OC2=CC=CC=C2)=C1Br	qsar_ready_smiles	0	0	1	0	0	1	0	0	0	0	0	0	0	0	0	0	1	0	0	0	1	polyhalogenated diphenyl ethers		1	low	0	0	0.966759
DTXSID90879888	446254371	446254-37-1	BDE-67	C12H6Br4O	BrC1=CC=CC(OC2=CC(Br)=C(Br)C=C2Br)=C1	qsar_ready_smiles	0	0	1	0	0	1	0	0	0	0	0	0	0	0	0	0	1	0	0	0	1	polyhalogenated diphenyl ethers		1	low	0	0	0.960251
DTXSID50879889	446254382	446254-38-2	2,4-Dibromo-1-(3,5-dibromophenoxy)benzene	C12H6Br4O	BrC1=CC=C(OC2=CC(Br)=CC(Br)=C2)C(Br)=C1	qsar_ready_smiles	0	0	1	0	0	1	0	0	0	0	0	0	0	0	0	0	1	0	0	0	1	polyhalogenated diphenyl ethers		1	low	0	0	0.942694
DTXSID20879891	446254393	446254-39-3	BDE-70	C12H6Br4O	BrC1=CC=C(Br)C(OC2=CC(Br)=C(Br)C=C2)=C1	qsar_ready_smiles	0	0	1	0	0	1	0	0	0	0	0	0	0	0	0	0	1	0	0	0	1	polyhalogenated diphenyl ethers		1	low	0	0	0.922047
DTXSID80879892	446254406	446254-40-6	BDE-72	C12H6Br4O	BrC1=CC(OC2=CC(Br)=CC(Br)=C2)=C(Br)C=C1	qsar_ready_smiles	0	0	1	0	0	1	0	0	0	0	0	0	0	0	0	0	1	0	0	0	1	polyhalogenated diphenyl ethers		1	low	0	0	0.934488
DTXSID40879893	446254417	446254-41-7	BDE-73	C12H6Br4O	BrC1=CC(OC2=C(Br)C=CC=C2Br)=CC(Br)=C1	qsar_ready_smiles	0	0	1	0	0	1	0	0	0	0	0	0	0	0	0	0	1	0	0	0	1	polyhalogenated diphenyl ethers		1	low	0	0	0.9399
DTXSID00879894	446254428	446254-42-8	BDE-74	C12H6Br4O	BrC1=CC=C(OC2=CC(Br)=C(Br)C=C2Br)C=C1	qsar_ready_smiles	0	0	1	0	0	1	0	0	0	0	0	0	0	0	0	0	1	0	0	0	1	polyhalogenated diphenyl ethers		1	low	0	0	0.960251
DTXSID20879896	446254439	446254-43-9	BDE-76	C12H6Br4O	BrC1=CC(OC2=CC=CC=C2Br)=CC(Br)=C1Br	qsar_ready_smiles	0	0	1	0	0	1	0	0	0	0	0	0	0	0	0	0	1	0	0	0	1	polyhalogenated diphenyl ethers		1	low	0	0	0.973155
DTXSID80879897	446254451	446254-45-1	BDE-78	C12H6Br4O	BrC1=CC=CC(OC2=CC(Br)=C(Br)C(Br)=C2)=C1	qsar_ready_smiles	0	0	1	0	0	1	0	0	0	0	0	0	0	0	0	0	1	0	0	0	1	polyhalogenated diphenyl ethers		1	low	0	0	0.959305
DTXSID40879898	446254484	446254-48-4	BDE-79	C12H6Br4O	BrC1=CC(OC2=CC=C(Br)C(Br)=C2)=CC(Br)=C1	qsar_ready_smiles	0	0	1	0	0	1	0	0	0	0	0	0	0	0	0	0	1	0	0	0	1	polyhalogenated diphenyl ethers		1	low	0	0	0.935487
DTXSID00879899	446254508	446254-50-8	BDE-81	C12H6Br4O	BrC1=CC=C(OC2=CC(Br)=C(Br)C(Br)=C2)C=C1	qsar_ready_smiles	0	0	1	0	0	1	0	0	0	0	0	0	0	0	0	0	1	0	0	0	1	polyhalogenated diphenyl ethers		1	low	0	0	0.959305
DTXSID50879900	446254519	446254-51-9	BDE-83	C12H5Br5O	BrC1=CC(OC2=CC=CC(Br)=C2Br)=C(Br)C(Br)=C1	qsar_ready_smiles	0	0	1	0	0	1	0	0	0	0	0	0	0	0	0	0	1	0	0	0	1	polyhalogenated diphenyl ethers		1	low	0	0	0.959707
DTXSID10879901	446254520	446254-52-0	BDE-84	C12H5Br5O	BrC1=CC=C(Br)C(OC2=CC=CC(Br)=C2Br)=C1Br	qsar_ready_smiles	0	0	1	0	0	1	0	0	0	0	0	0	0	0	0	0	1	0	0	0	1	polyhalogenated diphenyl ethers		1	low	0	0	0.959707
DTXSID70879902	446254531	446254-53-1	BDE-86	C12H5Br5O	BrC1=CC=CC=C1OC1=C(Br)C(Br)=C(Br)C(Br)=C1	qsar_ready_smiles	0	0	1	0	0	1	0	0	0	0	0	0	0	0	0	0	1	0	0	0	1	polyhalogenated diphenyl ethers		1	low	0	0	0.975126
DTXSID30879903	446254542	446254-54-2	BDE-87	C12H5Br5O	BrC1=CC=C(Br)C(OC2=C(Br)C(Br)=C(Br)C=C2)=C1	qsar_ready_smiles	0	0	1	0	0	1	0	0	0	0	0	0	0	0	0	0	1	0	0	0	1	polyhalogenated diphenyl ethers		1	low	0	0	0.972349
DTXSID90879904	446254553	446254-55-3	BDE-88	C12H5Br5O	BrC1=CC=CC=C1OC1=C(Br)C(Br)=C(Br)C=C1Br	qsar_ready_smiles	0	0	1	0	0	1	0	0	0	0	0	0	0	0	0	0	1	0	0	0	1	polyhalogenated diphenyl ethers		1	low	0	0	0.983959
DTXSID50879905	446254564	446254-56-4	BDE-89	C12H5Br5O	BrC1=CC=C(OC2=C(Br)C=CC=C2Br)C(Br)=C1Br	qsar_ready_smiles	0	0	1	0	0	1	0	0	0	0	0	0	0	0	0	0	1	0	0	0	1	polyhalogenated diphenyl ethers		1	low	0	0	0.973155
DTXSID10879906	446254575	446254-57-5	1,2,5-Tribromo-3-(2,4-dibromophenoxy)benzene	C12H5Br5O	BrC1=CC(Br)=C(OC2=CC(Br)=CC(Br)=C2Br)C=C1	qsar_ready_smiles	0	0	1	0	0	1	0	0	0	0	0	0	0	0	0	0	1	0	0	0	1	polyhalogenated diphenyl ethers		1	low	0	0	0.960251
DTXSID70879907	446254586	446254-58-6	BDE-91	C12H5Br5O	BrC1=CC(Br)=C(OC2=C(Br)C=CC(Br)=C2Br)C=C1	qsar_ready_smiles	0	0	1	0	0	1	0	0	0	0	0	0	0	0	0	0	1	0	0	0	1	polyhalogenated diphenyl ethers		1	low	0	0	0.960251
DTXSID30879908	446254597	446254-59-7	BDE-92	C12H5Br5O	BrC1=CC(OC2=CC(Br)=CC(Br)=C2Br)=C(Br)C=C1	qsar_ready_smiles	0	0	1	0	0	1	0	0	0	0	0	0	0	0	0	0	1	0	0	0	1	polyhalogenated diphenyl ethers		1	low	0	0	0.959707
DTXSID90785354	446254600	446254-60-0	1,2,4,5-Tetrabromo-3-(2-bromophenoxy)benzene	C12H5Br5O	BrC1=CC(Br)=C(Br)C(OC2=CC=CC=C2Br)=C1Br	qsar_ready_smiles	0	0	1	0	0	1	0	0	0	0	0	0	0	0	0	0	1	0	0	0	1	polyhalogenated diphenyl ethers		1	low	0	1	0.959707
DTXSID90879909	446254611	446254-61-1	BDE-94	C12H5Br5O	BrC1=CC(Br)=C(Br)C(OC2=C(Br)C=CC=C2Br)=C1	qsar_ready_smiles	0	0	1	0	0	1	0	0	0	0	0	0	0	0	0	0	1	0	0	0	1	polyhalogenated diphenyl ethers		1	low	0	0	0.959707
DTXSID00879910	446254622	446254-62-2	BDE-95	C12H5Br5O	BrC1=CC(OC2=C(Br)C=CC(Br)=C2Br)=C(Br)C=C1	qsar_ready_smiles	0	0	1	0	0	1	0	0	0	0	0	0	0	0	0	0	1	0	0	0	1	polyhalogenated diphenyl ethers		1	low	0	0	0.959707
DTXSID60879911	446254633	446254-63-3	BDE-96	C12H5Br5O	BrC1=CC=CC(Br)=C1OC1=C(Br)C=CC(Br)=C1Br	qsar_ready_smiles	0	0	1	0	0	1	0	0	0	0	0	0	0	0	0	0	1	0	0	0	1	polyhalogenated diphenyl ethers		1	low	0	0	0.959707
DTXSID20879912	446254644	446254-64-4	BDE-97	C12H5Br5O	BrC1=CC(Br)=C(OC2=CC=CC(Br)=C2Br)C=C1Br	qsar_ready_smiles	0	0	1	0	0	1	0	0	0	0	0	0	0	0	0	0	1	0	0	0	1	polyhalogenated diphenyl ethers		1	low	0	0	0.960251
DTXSID80879913	446254655	446254-65-5	BDE-101	C12H5Br5O	BrC1=CC=C(Br)C(OC2=C(Br)C=C(Br)C(Br)=C2)=C1	qsar_ready_smiles	0	0	1	0	0	1	0	0	0	0	0	0	0	0	0	0	1	0	0	0	1	polyhalogenated diphenyl ethers		1	low	0	0	0.960251
DTXSID40879914	446254666	446254-66-6	BDE-102	C12H5Br5O	BrC1=CC(Br)=C(OC2=C(Br)C=CC=C2Br)C=C1Br	qsar_ready_smiles	0	0	1	0	0	1	0	0	0	0	0	0	0	0	0	0	1	0	0	0	1	polyhalogenated diphenyl ethers		1	low	0	0	0.960251
DTXSID00879915	446254677	446254-67-7	BDE-103	C12H5Br5O	BrC1=CC=C(Br)C(OC2=C(Br)C=C(Br)C=C2Br)=C1	qsar_ready_smiles	0	0	1	0	0	1	0	0	0	0	0	0	0	0	0	0	1	0	0	0	1	polyhalogenated diphenyl ethers		1	low	0	0	0.963587
DTXSID60879916	446254688	446254-68-8	BDE-104	C12H5Br5O	BrC1=CC(Br)=C(OC2=C(Br)C=CC=C2Br)C(Br)=C1	qsar_ready_smiles	0	0	1	0	0	1	0	0	0	0	0	0	0	0	0	0	1	0	0	0	1	polyhalogenated diphenyl ethers		1	low	0	0	0.950471
DTXSID80879918	446254699	446254-69-9	BDE-106	C12H5Br5O	BrC1=CC=CC(OC2=CC(Br)=C(Br)C(Br)=C2Br)=C1	qsar_ready_smiles	0	0	1	0	0	1	0	0	0	0	0	0	0	0	0	0	1	0	0	0	1	polyhalogenated diphenyl ethers		1	low	0	0	0.975126
DTXSID40879919	446254702	446254-70-2	BDE-107	C12H5Br5O	BrC1=CC(Br)=C(Br)C(OC2=CC(Br)=C(Br)C=C2)=C1	qsar_ready_smiles	0	0	1	0	0	1	0	0	0	0	0	0	0	0	0	0	1	0	0	0	1	polyhalogenated diphenyl ethers		1	low	0	0	0.960251
DTXSID50879920	446254713	446254-71-3	BDE-108	C12H5Br5O	BrC1=CC(OC2=CC=C(Br)C(Br)=C2Br)=CC(Br)=C1	qsar_ready_smiles	0	0	1	0	0	1	0	0	0	0	0	0	0	0	0	0	1	0	0	0	1	polyhalogenated diphenyl ethers		1	low	0	0	0.973155
DTXSID10879921	446254724	446254-72-4	BDE-109	C12H5Br5O	BrC1=CC=CC(OC2=C(Br)C=C(Br)C(Br)=C2Br)=C1	qsar_ready_smiles	0	0	1	0	0	1	0	0	0	0	0	0	0	0	0	0	1	0	0	0	1	polyhalogenated diphenyl ethers		1	low	0	0	0.983959
DTXSID70879922	446254735	446254-73-5	BDE-110	C12H5Br5O	BrC1=C(Br)C=C(OC2=C(Br)C=CC(Br)=C2Br)C=C1	qsar_ready_smiles	0	0	1	0	0	1	0	0	0	0	0	0	0	0	0	0	1	0	0	0	1	polyhalogenated diphenyl ethers		1	low	0	0	0.960251
DTXSID30879923	446254746	446254-74-6	BDE-111	C12H5Br5O	BrC1=CC(OC2=CC(Br)=CC(Br)=C2Br)=CC(Br)=C1	qsar_ready_smiles	0	0	1	0	0	1	0	0	0	0	0	0	0	0	0	0	1	0	0	0	1	polyhalogenated diphenyl ethers		1	low	0	0	0.959707
DTXSID90879924	446254757	446254-75-7	BDE-112	C12H5Br5O	BrC1=CC=CC(OC2=C(Br)C(Br)=CC(Br)=C2Br)=C1	qsar_ready_smiles	0	0	1	0	0	1	0	0	0	0	0	0	0	0	0	0	1	0	0	0	1	polyhalogenated diphenyl ethers		1	low	0	0	0.959707
DTXSID50879925	446254768	446254-76-8	BDE-113	C12H5Br5O	BrC1=CC(OC2=C(Br)C=CC(Br)=C2Br)=CC(Br)=C1	qsar_ready_smiles	0	0	1	0	0	1	0	0	0	0	0	0	0	0	0	0	1	0	0	0	1	polyhalogenated diphenyl ethers		1	low	0	0	0.959707
DTXSID10879926	446254779	446254-77-9	BDE-114	C12H5Br5O	BrC1=CC=C(OC2=C(Br)C(Br)=C(Br)C(Br)=C2)C=C1	qsar_ready_smiles	0	0	1	0	0	1	0	0	0	0	0	0	0	0	0	0	1	0	0	0	1	polyhalogenated diphenyl ethers		1	low	0	0	0.975126
DTXSID70879927	446254780	446254-78-0	BDE-115	C12H5Br5O	BrC1=CC=C(OC2=C(Br)C(Br)=C(Br)C=C2Br)C=C1	qsar_ready_smiles	0	0	1	0	0	1	0	0	0	0	0	0	0	0	0	0	1	0	0	0	1	polyhalogenated diphenyl ethers		1	low	0	0	0.983959
DTXSID30879928	446254791	446254-79-1	BDE-117	C12H5Br5O	BrC1=CC=C(OC2=C(Br)C(Br)=CC(Br)=C2Br)C=C1	qsar_ready_smiles	0	0	1	0	0	1	0	0	0	0	0	0	0	0	0	0	1	0	0	0	1	polyhalogenated diphenyl ethers		1	low	0	0	0.960251
DTXSID40724016	446254804	446254-80-4	1,2,4-Tribromo-5-(3,4-dibromophenoxy)benzene	C12H5Br5O	BrC1=CC(Br)=C(Br)C=C1OC1=CC(Br)=C(Br)C=C1	qsar_ready_smiles	0	0	1	0	0	1	0	0	0	0	0	0	0	0	0	0	1	0	0	0	1	polyhalogenated diphenyl ethers		1	low	0	1	0.960251
DTXSID90879929	446254815	446254-81-5	BDE-121	C12H5Br5O	BrC1=CC(Br)=C(OC2=CC(Br)=CC(Br)=C2)C(Br)=C1	qsar_ready_smiles	0	0	1	0	0	1	0	0	0	0	0	0	0	0	0	0	1	0	0	0	1	polyhalogenated diphenyl ethers		1	low	0	0	0.965267
DTXSID00879930	446254826	446254-82-6	BDE-122	C12H5Br5O	BrC1=CC=CC(OC2=CC(Br)=C(Br)C(Br)=C2)=C1Br	qsar_ready_smiles	0	0	1	0	0	1	0	0	0	0	0	0	0	0	0	0	1	0	0	0	1	polyhalogenated diphenyl ethers		1	low	0	0	0.973155
DTXSID60879931	446254837	446254-83-7	BDE-123	C12H5Br5O	BrC1=CC(Br)=C(OC2=CC(Br)=C(Br)C(Br)=C2)C=C1	qsar_ready_smiles	0	0	1	0	0	1	0	0	0	0	0	0	0	0	0	0	1	0	0	0	1	polyhalogenated diphenyl ethers		1	low	0	0	0.973155
DTXSID20879932	446254848	446254-84-8	BDE-124	C12H5Br5O	BrC1=CC(OC2=CC(Br)=C(Br)C(Br)=C2)=C(Br)C=C1	qsar_ready_smiles	0	0	1	0	0	1	0	0	0	0	0	0	0	0	0	0	1	0	0	0	1	polyhalogenated diphenyl ethers		1	low	0	0	0.972349
DTXSID80879933	446254859	446254-85-9	BDE-125	C12H5Br5O	BrC1=CC(OC2=C(Br)C=CC=C2Br)=CC(Br)=C1Br	qsar_ready_smiles	0	0	1	0	0	1	0	0	0	0	0	0	0	0	0	0	1	0	0	0	1	polyhalogenated diphenyl ethers		1	low	0	0	0.973155
DTXSID40879934	446254860	446254-86-0	BDE-127	C12H5Br5O	BrC1=CC(OC2=CC(Br)=C(Br)C(Br)=C2)=CC(Br)=C1	qsar_ready_smiles	0	0	1	0	0	1	0	0	0	0	0	0	0	0	0	0	1	0	0	0	1	polyhalogenated diphenyl ethers		1	low	0	0	0.959305
DTXSID00879935	446254871	446254-87-1	BDE-129	C12H4Br6O	BrC1=CC(OC2=CC=CC(Br)=C2Br)=C(Br)C(Br)=C1Br	qsar_ready_smiles	0	0	1	0	0	1	0	0	0	0	0	0	0	0	0	0	1	0	0	0	1	polyhalogenated diphenyl ethers		1	low	0	0	0.975126
DTXSID70881106	446254882	446254-88-2	1,2,3-Tribromo-4-(2,3,5-tribromophenoxy)benzene	C12H4Br6O	BrC1=CC(OC2=CC=C(Br)C(Br)=C2Br)=C(Br)C(Br)=C1	qsar_ready_smiles	0	0	1	0	0	1	0	0	0	0	0	0	0	0	0	0	1	0	0	0	1	polyhalogenated diphenyl ethers		1	low	0	0	0.975126
DTXSID60879936	446254893	446254-89-3	BDE-131	C12H4Br6O	BrC1=CC(Br)=C(Br)C(Br)=C1OC1=CC=CC(Br)=C1Br	qsar_ready_smiles	0	0	1	0	0	1	0	0	0	0	0	0	0	0	0	0	1	0	0	0	1	polyhalogenated diphenyl ethers		1	low	0	0	0.983959
DTXSID20879937	446254906	446254-90-6	BDE-132	C12H4Br6O	BrC1=C(Br)C(Br)=C(OC2=C(Br)C=CC(Br)=C2Br)C=C1	qsar_ready_smiles	0	0	1	0	0	1	0	0	0	0	0	0	0	0	0	0	1	0	0	0	1	polyhalogenated diphenyl ethers		1	low	0	0	0.975126
DTXSID80879938	446254917	446254-91-7	BDE-133	C12H4Br6O	BrC1=CC(OC2=CC(Br)=CC(Br)=C2Br)=C(Br)C(Br)=C1	qsar_ready_smiles	0	0	1	0	0	1	0	0	0	0	0	0	0	0	0	0	1	0	0	0	1	polyhalogenated diphenyl ethers		1	low	0	0	0.959707
DTXSID40879939	446254928	446254-92-8	BDE-134	C12H4Br6O	BrC1=CC(Br)=C(Br)C(OC2=CC=CC(Br)=C2Br)=C1Br	qsar_ready_smiles	0	0	1	0	0	1	0	0	0	0	0	0	0	0	0	0	1	0	0	0	1	polyhalogenated diphenyl ethers		1	low	0	0	0.959707
DTXSID50879940	446254939	446254-93-9	BDE-135	C12H4Br6O	BrC1=CC(OC2=C(Br)C=CC(Br)=C2Br)=C(Br)C(Br)=C1	qsar_ready_smiles	0	0	1	0	0	1	0	0	0	0	0	0	0	0	0	0	1	0	0	0	1	polyhalogenated diphenyl ethers		1	low	0	0	0.959707
DTXSID10879941	446254940	446254-94-0	BDE-136	C12H4Br6O	BrC1=C(Br)C(OC2=C(Br)C=CC(Br)=C2Br)=C(Br)C=C1	qsar_ready_smiles	0	0	1	0	0	1	0	0	0	0	0	0	0	0	0	0	1	0	0	0	1	polyhalogenated diphenyl ethers		1	low	0	0	0.959707
DTXSID70879942	446254951	446254-95-1	BDE-137	C12H4Br6O	BrC1=CC=C(OC2=C(Br)C(Br)=C(Br)C(Br)=C2)C(Br)=C1	qsar_ready_smiles	0	0	1	0	0	1	0	0	0	0	0	0	0	0	0	0	1	0	0	0	1	polyhalogenated diphenyl ethers		1	low	0	0	0.975126
DTXSID30785353	446254962	446254-96-2	1,2,3,5-Tetrabromo-4-(2,4-dibromophenoxy)benzene	C12H4Br6O	BrC1=CC(Br)=C(OC2=C(Br)C(Br)=C(Br)C=C2Br)C=C1	qsar_ready_smiles	0	0	1	0	0	1	0	0	0	0	0	0	0	0	0	0	1	0	0	0	1	polyhalogenated diphenyl ethers		1	low	0	1	0.983959
DTXSID90879944	446254973	446254-97-3	BDE-141	C12H4Br6O	BrC1=CC(OC2=CC(Br)=C(Br)C(Br)=C2Br)=C(Br)C=C1	qsar_ready_smiles	0	0	1	0	0	1	0	0	0	0	0	0	0	0	0	0	1	0	0	0	1	polyhalogenated diphenyl ethers		1	low	0	0	0.975126
DTXSID50879945	446254984	446254-98-4	BDE-142	C12H4Br6O	BrC1=C(OC2=C(Br)C(Br)=C(Br)C(Br)=C2Br)C=CC=C1	qsar_ready_smiles	0	0	1	0	0	1	0	0	0	0	0	0	0	0	0	0	1	0	0	0	1	polyhalogenated diphenyl ethers		1	low	0	0	0.98377
DTXSID10879946	446254995	446254-99-5	BDE-143	C12H4Br6O	BrC1=CC=CC(Br)=C1OC1=CC(Br)=C(Br)C(Br)=C1Br	qsar_ready_smiles	0	0	1	0	0	1	0	0	0	0	0	0	0	0	0	0	1	0	0	0	1	polyhalogenated diphenyl ethers		1	low	0	0	0.975126
DTXSID70879947	446255001	446255-00-1	BDE-144	C12H4Br6O	BrC1=CC(OC2=C(Br)C=C(Br)C(Br)=C2Br)=C(Br)C=C1	qsar_ready_smiles	0	0	1	0	0	1	0	0	0	0	0	0	0	0	0	0	1	0	0	0	1	polyhalogenated diphenyl ethers		1	low	0	0	0.983959
DTXSID30879948	446255012	446255-01-2	BDE-145	C12H4Br6O	BrC1=CC(Br)=C(OC2=C(Br)C=CC=C2Br)C(Br)=C1Br	qsar_ready_smiles	0	0	1	0	0	1	0	0	0	0	0	0	0	0	0	0	1	0	0	0	1	polyhalogenated diphenyl ethers		1	low	0	0	0.983959
DTXSID90879949	446255023	446255-02-3	BDE-146	C12H4Br6O	BrC1=CC(Br)=C(Br)C(OC2=C(Br)C=C(Br)C(Br)=C2)=C1	qsar_ready_smiles	0	0	1	0	0	1	0	0	0	0	0	0	0	0	0	0	1	0	0	0	1	polyhalogenated diphenyl ethers		1	low	0	0	0.960251
DTXSID60879951	446255034	446255-03-4	BDE-148	C12H4Br6O	BrC1=CC(Br)=C(OC2=CC(Br)=CC(Br)=C2Br)C(Br)=C1	qsar_ready_smiles	0	0	1	0	0	1	0	0	0	0	0	0	0	0	0	0	1	0	0	0	1	polyhalogenated diphenyl ethers		1	low	0	0	0.975796
DTXSID20879952	446255045	446255-04-5	BDE-149	C12H4Br6O	BrC1=CC(Br)=C(OC2=C(Br)C=CC(Br)=C2Br)C=C1Br	qsar_ready_smiles	0	0	1	0	0	1	0	0	0	0	0	0	0	0	0	0	1	0	0	0	1	polyhalogenated diphenyl ethers		1	low	0	0	0.960251
DTXSID80879953	446255056	446255-05-6	BDE-150	C12H4Br6O	BrC1=CC(Br)=C(OC2=C(Br)C=CC(Br)=C2Br)C(Br)=C1	qsar_ready_smiles	0	0	1	0	0	1	0	0	0	0	0	0	0	0	0	0	1	0	0	0	1	polyhalogenated diphenyl ethers		1	low	0	0	0.975796
DTXSID40879954	446255067	446255-06-7	BDE-151	C12H4Br6O	BrC1=CC(OC2=C(Br)C(Br)=CC(Br)=C2Br)=C(Br)C=C1	qsar_ready_smiles	0	0	1	0	0	1	0	0	0	0	0	0	0	0	0	0	1	0	0	0	1	polyhalogenated diphenyl ethers		1	low	0	0	0.959707
DTXSID00879955	446255078	446255-07-8	BDE-152	C12H4Br6O	BrC1=CC(Br)=C(Br)C(OC2=C(Br)C=CC=C2Br)=C1Br	qsar_ready_smiles	0	0	1	0	0	1	0	0	0	0	0	0	0	0	0	0	1	0	0	0	1	polyhalogenated diphenyl ethers		1	low	0	0	0.959707
DTXSID60879956	446255089	446255-08-9	BDE-157	C12H4Br6O	BrC1=CC=C(OC2=CC(Br)=C(Br)C(Br)=C2)C(Br)=C1Br	qsar_ready_smiles	0	0	1	0	0	1	0	0	0	0	0	0	0	0	0	0	1	0	0	0	1	polyhalogenated diphenyl ethers		1	low	0	0	0.973155
DTXSID20879957	446255090	446255-09-0	BDE-158	C12H4Br6O	BrC1=CC(Br)=C(OC2=CC(Br)=C(Br)C=C2)C(Br)=C1Br	qsar_ready_smiles	0	0	1	0	0	1	0	0	0	0	0	0	0	0	0	0	1	0	0	0	1	polyhalogenated diphenyl ethers		1	low	0	0	0.983959
DTXSID80879958	446255103	446255-10-3	BDE-159	C12H4Br6O	BrC1=CC(OC2=CC(Br)=C(Br)C(Br)=C2Br)=CC(Br)=C1	qsar_ready_smiles	0	0	1	0	0	1	0	0	0	0	0	0	0	0	0	0	1	0	0	0	1	polyhalogenated diphenyl ethers		1	low	0	0	0.975126
DTXSID40879959	446255114	446255-11-4	BDE-160	C12H4Br6O	BrC1=CC=CC(OC2=C(Br)C(Br)=C(Br)C(Br)=C2Br)=C1	qsar_ready_smiles	0	0	1	0	0	1	0	0	0	0	0	0	0	0	0	0	1	0	0	0	1	polyhalogenated diphenyl ethers		1	low	0	0	0.98377
DTXSID50879960	446255125	446255-12-5	BDE-161	C12H4Br6O	BrC1=CC(OC2=C(Br)C=C(Br)C(Br)=C2Br)=CC(Br)=C1	qsar_ready_smiles	0	0	1	0	0	1	0	0	0	0	0	0	0	0	0	0	1	0	0	0	1	polyhalogenated diphenyl ethers		1	low	0	0	0.983959
DTXSID10879961	446255136	446255-13-6	BDE-162	C12H4Br6O	BrC1=CC(Br)=C(Br)C(OC2=CC(Br)=C(Br)C(Br)=C2)=C1	qsar_ready_smiles	0	0	1	0	0	1	0	0	0	0	0	0	0	0	0	0	1	0	0	0	1	polyhalogenated diphenyl ethers		1	low	0	0	0.975126
DTXSID70879962	446255147	446255-14-7	BDE-163	C12H4Br6O	BrC1=CC(Br)=C(Br)C(OC2=CC(Br)=C(Br)C=C2)=C1Br	qsar_ready_smiles	0	0	1	0	0	1	0	0	0	0	0	0	0	0	0	0	1	0	0	0	1	polyhalogenated diphenyl ethers		1	low	0	0	0.960251
DTXSID30879963	446255158	446255-15-8	BDE-164	C12H4Br6O	BrC1=CC(OC2=C(Br)C=CC(Br)=C2Br)=CC(Br)=C1Br	qsar_ready_smiles	0	0	1	0	0	1	0	0	0	0	0	0	0	0	0	0	1	0	0	0	1	polyhalogenated diphenyl ethers		1	low	0	0	0.975126
DTXSID90879964	446255169	446255-16-9	BDE-165	C12H4Br6O	BrC1=CC(OC2=C(Br)C(Br)=CC(Br)=C2Br)=CC(Br)=C1	qsar_ready_smiles	0	0	1	0	0	1	0	0	0	0	0	0	0	0	0	0	1	0	0	0	1	polyhalogenated diphenyl ethers		1	low	0	0	0.959707
DTXSID10879966	446255170	446255-17-0	BDE-167	C12H4Br6O	BrC1=CC(OC2=CC(Br)=C(Br)C=C2Br)=CC(Br)=C1Br	qsar_ready_smiles	0	0	1	0	0	1	0	0	0	0	0	0	0	0	0	0	1	0	0	0	1	polyhalogenated diphenyl ethers		1	low	0	0	0.975126
DTXSID30879968	446255181	446255-18-1	BDE-169	C12H4Br6O	BrC1=CC(OC2=CC(Br)=C(Br)C(Br)=C2)=CC(Br)=C1Br	qsar_ready_smiles	0	0	1	0	0	1	0	0	0	0	0	0	0	0	0	0	1	0	0	0	1	polyhalogenated diphenyl ethers		1	low	0	0	0.959305
DTXSID80873971	446255192	446255-19-2	BDE-171	C12H3Br7O	BrC1=CC(Br)=C(OC2=C(Br)C(Br)=C(Br)C=C2)C(Br)=C1Br	qsar_ready_smiles	0	0	1	0	0	1	0	0	0	0	0	0	0	0	0	0	1	0	0	0	1	polyhalogenated diphenyl ethers		1	low	0	0	0.983959
DTXSID60879971	446255216	446255-21-6	BDE-174	C12H3Br7O	BrC1=CC=C(Br)C(OC2=CC(Br)=C(Br)C(Br)=C2Br)=C1Br	qsar_ready_smiles	0	0	1	0	0	1	0	0	0	0	0	0	0	0	0	0	1	0	0	0	1	polyhalogenated diphenyl ethers		1	low	0	0	0.975126
DTXSID20879972	446255227	446255-22-7	BDE-175	C12H3Br7O	BrC1=CC(OC2=C(Br)C=C(Br)C(Br)=C2Br)=C(Br)C(Br)=C1	qsar_ready_smiles	0	0	1	0	0	1	0	0	0	0	0	0	0	0	0	0	1	0	0	0	1	polyhalogenated diphenyl ethers		1	low	0	0	0.983959
DTXSID40879974	446255238	446255-23-8	BDE-177	C12H3Br7O	BrC1=CC=C(OC2=C(Br)C(Br)=CC(Br)=C2Br)C(Br)=C1Br	qsar_ready_smiles	0	0	1	0	0	1	0	0	0	0	0	0	0	0	0	0	1	0	0	0	1	polyhalogenated diphenyl ethers		1	low	0	0	0.975126
DTXSID00879975	446255249	446255-24-9	BDE-178	C12H3Br7O	BrC1=CC(Br)=C(Br)C(OC2=C(Br)C(Br)=CC(Br)=C2Br)=C1	qsar_ready_smiles	0	0	1	0	0	1	0	0	0	0	0	0	0	0	0	0	1	0	0	0	1	polyhalogenated diphenyl ethers		1	low	0	0	0.959707
DTXSID60879976	446255250	446255-25-0	BDE-179	C12H3Br7O	BrC1=CC(Br)=C(Br)C(OC2=C(Br)C=CC(Br)=C2Br)=C1Br	qsar_ready_smiles	0	0	1	0	0	1	0	0	0	0	0	0	0	0	1	0	1	0	0	0	1	polyhalogenated diphenyl ethers		2	med	0	0	0.959707
DTXSID40873972	446255261	446255-26-1	BDE-180	C12H3Br7O	BrC1=CC(Br)=C(OC2=CC(Br)=C(Br)C(Br)=C2Br)C=C1Br	qsar_ready_smiles	0	0	0	0	0	1	0	0	0	0	0	0	0	0	1	0	1	0	0	0	1	polyhalogenated diphenyl ethers		2	med	0	0	0.975126
DTXSID80879978	446255272	446255-27-2	BDE-186	C12H3Br7O	BrC1=CC=CC(Br)=C1OC1=C(Br)C(Br)=C(Br)C(Br)=C1Br	qsar_ready_smiles	0	0	1	0	0	1	0	0	0	0	0	0	0	0	0	0	1	0	0	0	1	polyhalogenated diphenyl ethers		1	low	0	0	0.98377
DTXSID40879979	446255283	446255-28-3	BDE-187	C12H3Br7O	BrC1=CC(Br)=C(OC2=C(Br)C(Br)=CC(Br)=C2Br)C=C1Br	qsar_ready_smiles	0	0	1	0	0	1	0	0	0	0	0	0	0	0	0	0	1	0	0	0	1	polyhalogenated diphenyl ethers		1	low	0	0	0.960251
DTXSID10704805	446255307	446255-30-7	1,2,3,5-Tetrabromo-4-(3,4,5-tribromophenoxy)benzene	C12H3Br7O	BrC1=CC(OC2=C(Br)C(Br)=C(Br)C=C2Br)=CC(Br)=C1Br	qsar_ready_smiles	0	0	0	0	0	1	0	0	0	0	0	0	0	0	1	0	1	0	0	0	1	polyhalogenated diphenyl ethers		2	med	0	1	0.983959
DTXSID10879981	446255341	446255-34-1	BDE-193	C12H3Br7O	BrC1=CC(Br)=C(Br)C(OC2=CC(Br)=C(Br)C(Br)=C2)=C1Br	qsar_ready_smiles	0	0	1	0	0	1	0	0	0	0	0	0	0	0	0	0	1	0	0	0	1	polyhalogenated diphenyl ethers		1	low	0	0	0.975126
DTXSID4074774	446255385	446255-38-5	PBDE 195	C12H2Br8O	BrC1=C(Br)C(Br)=C(OC2=C(Br)C(Br)=C(Br)C(Br)=C2Br)C=C1	qsar_ready_smiles	0	0	0	0	0	1	0	0	0	0	0	0	0	0	1	0	1	0	0	0	1	polyhalogenated diphenyl ethers		2	med	0	1	0.98377
DTXSID3074789	446255396	446255-39-6	BDE-196	C12H2Br8O	BrC1=CC(Br)=C(OC2=CC(Br)=C(Br)C(Br)=C2Br)C(Br)=C1Br	qsar_ready_smiles	0	0	0	0	0	1	0	0	0	0	0	0	0	0	1	0	1	0	0	0	1	polyhalogenated diphenyl ethers		2	med	0	1	0.983959
DTXSID30879988	446255421	446255-42-1	BDE-198	C12H2Br8O	BrC1=CC(Br)=C(Br)C(OC2=C(Br)C(Br)=C(Br)C(Br)=C2Br)=C1	qsar_ready_smiles	0	0	0	0	0	1	0	0	0	0	0	0	0	0	1	0	1	0	0	0	1	polyhalogenated diphenyl ethers		2	med	0	0	0.98377
DTXSID70879982	446255432	446255-43-2	BDE-199	C12H2Br8O	BrC1=CC(Br)=C(Br)C(OC2=CC(Br)=C(Br)C(Br)=C2Br)=C1Br	qsar_ready_smiles	0	0	0	0	0	1	0	0	0	0	0	0	0	0	1	0	1	0	0	0	1	polyhalogenated diphenyl ethers		2	med	0	0	0.975126
DTXSID30879983	446255465	446255-46-5	BDE-200	C12H2Br8O	BrC1=CC=C(Br)C(OC2=C(Br)C(Br)=C(Br)C(Br)=C2Br)=C1Br	qsar_ready_smiles	0	0	0	0	0	1	0	0	0	0	0	0	0	0	1	0	1	0	0	0	1	polyhalogenated diphenyl ethers		2	med	0	0	0.98377
DTXSID90879984	446255501	446255-50-1	BDE-201	C12H2Br8O	BrC1=CC(Br)=C(OC2=C(Br)C(Br)=CC(Br)=C2Br)C(Br)=C1Br	qsar_ready_smiles	0	0	0	0	0	1	0	0	0	0	0	1	0	0	1	0	1	0	0	0	1	polyhalogenated diphenyl ethers		3	med	0	0	0.983959
DTXSID00196255	446255545	446255-54-5	2,2',3,4,4',5,6,6'-Octabromodiphenyl ether	C12H2Br8O	BrC1=CC(Br)=C(OC2=C(Br)C(Br)=C(Br)C(Br)=C2Br)C(Br)=C1	qsar_ready_smiles	0	0	0	0	0	1	0	0	0	0	0	0	0	0	1	0	1	0	0	0	1	polyhalogenated diphenyl ethers		2	med	0	1	0.98377
DTXSID4074776	446255567	446255-56-7	PBDE 205	C12H2Br8O	BrC1=CC(OC2=C(Br)C(Br)=C(Br)C(Br)=C2Br)=CC(Br)=C1Br	qsar_ready_smiles	0	0	0	0	0	1	0	0	0	0	0	0	0	0	1	0	1	0	0	0	1	polyhalogenated diphenyl ethers		2	med	0	1	0.98377
DTXSID30573656	497107138	497107-13-8	1,1'-[Oxybis(methylene)]bis(pentabromobenzene)	C14H4Br10O	BrC1=C(Br)C(Br)=C(COCC2=C(Br)C(Br)=C(Br)C(Br)=C2Br)C(Br)=C1Br	qsar_ready_smiles	0	0	0	1	0	1	1	0	0	0	0	0	0	1	1	0	1	0	0	0	1	polyhalogenated benzene aliphatics and functionalized		5	high	1	0	0.889723
DTXSID401016672	678970155	678970-15-5	(-)-alpha-Hexabromocyclododecane	C12H18Br6	BrC1CCC(Br)C(Br)CCC(Br)C(Br)CCC1Br	qsar_ready_smiles	0	0	0	1	0	0	0	0	0	1	0	0	0	0	0	0	1	0	0	0	1	polyhalogenated alicycles		2	med	1	0	0.808216
DTXSID30467127	678970166	678970-16-6	(+)-beta-Hexabromocyclododecane	C12H18Br6	BrC1CCC(Br)C(Br)CCC(Br)C(Br)CCC1Br	qsar_ready_smiles	0	0	0	1	0	0	0	0	0	1	0	0	0	0	1	0	1	0	0	0	1	polyhalogenated alicycles		3	med	1	0	0.808216
DTXSID701016671	678970177	678970-17-7	(+)-gamma-Hexabromocyclododecane	C12H18Br6	BrC1CCC(Br)C(Br)CCC(Br)C(Br)CCC1Br	qsar_ready_smiles	0	0	0	1	0	0	0	0	0	1	0	0	0	0	1	0	1	0	0	0	1	polyhalogenated alicycles		3	med	1	0	0.808216
DTXSID501016706	855992982	855992-98-2	(rel)-(1R,2R,3S,4S)-1,2,3,9-tetrabromo-1,2,3,4-tetrahydro-1,4-methanonaphthalene	C11H8Br4	BrC1C(Br)C2(Br)C(Br)C1C1=C2C=CC=C1	qsar_ready_smiles	0	0	0	1	0	0	0	0	0	0	0	0	0	0	1	0	1	0	0	0	1	polyhalogenated carbocycles		2	med	1	0	0.861114
DTXSID201016707	855993010	855993-01-0	(rel)-(1R,2S,3S,4S)-1,2,3,9-tetrabromo-1,2,3,4-tetrahydro-1,4-methanonaphthalene	C11H8Br4	BrC1C(Br)C2(Br)C(Br)C1C1=C2C=CC=C1	qsar_ready_smiles	0	0	0	1	0	0	0	0	0	0	0	0	0	0	1	0	1	0	0	0	1	polyhalogenated benzene aliphatics and functionalized		2	med	1	0	0.861114
DTXSID70880073	860302336	860302-33-6	Firemaster 550				1	0	0	0	0	1	0	0	0	0	0	0	0	0	0	0	1	0	0	0	1	polyhalogenated phthalates/benzoates/imides		1	low	0	0	0
DTXSID00108393	880647201	880647-20-1	Polyphosphoric acids, compds. with pyrolyzed melamine				0	0	0	0	1	0	0	0	0	0	0	0	0	0	0	0	0	1	1	0	1			1	low	0	0	0
DTXSID901016677	893843077	893843-07-7	4,5,6,7-tetrabromo-1,1,3-trimethyl-3-(2,3,4,6-tetrabromophenyl)-2,3-dihydro-1H-indene	C18H12Br8	CC1(C)CC(C)(C2=C(Br)C(Br)=C(Br)C(Br)=C12)C1=C(Br)C(Br)=C(Br)C=C1Br	qsar_ready_smiles	0	0	0	1	0	0	1	0	0	1	1	0	0	1	1	0	1	0	0	0	1	polyhalogenated benzene alicycles		6	high	1	0	0.91235
DTXSID60872765	1003300739	1003300-73-9	Mixed esters of phosphoric acid with [1,​1'-​biphenyl]​-​4,​4'-​diol and phenol				0	0	0	0	1	1	0	0	0	0	0	0	0	0	0	0	0	1	1	0	1			2	med	0	0	0
DTXSID601016680	1025956653	1025956-65-3	2,4,5,6,7-pentabromo-1,1,3-trimethyl-3-(2,4,6-tribromophenyl)-2,3-dihydro-1H-indene	C18H12Br8	CC1(C)C(Br)C(C)(C2=C(Br)C(Br)=C(Br)C(Br)=C12)C1=C(Br)C=C(Br)C=C1Br	qsar_ready_smiles	0	0	0	1	0	0	1	0	0	1	1	0	0	1	1	0	1	0	0	0	1	polyhalogenated benzene alicycles		6	high	1	0	0.944634
DTXSID20893653	1047637375	1047637-37-5	2,2-Bis(chloromethyl)-1,3-propanediyl tetrakis(1-chloro-2-propanyl) bis(phosphate)	C17H32Cl6O8P2	CC(CCl)OP(=O)(OCC(CCl)(CCl)COP(=O)(OC(C)CCl)OC(C)CCl)OC(C)CCl	qsar_ready_smiles	0	0	0	0	1	1	0	0	0	0	1	0	0	1	1	0	1	0	0	0	1	polyhalogenated organophosphates		5	high	0	0	0.972387
DTXSID30858238	1084889519	1084889-51-9	4,5,6,7-Tetrabromo-1,1,3-trimethyl-3-(2,3,4,5-tetrabromophenyl)-2,3-dihydro-1H-indene	C18H12Br8	CC1(C)CC(C)(C2=C1C(Br)=C(Br)C(Br)=C2Br)C1=CC(Br)=C(Br)C(Br)=C1Br	qsar_ready_smiles	0	0	0	1	0	1	1	0	0	1	1	0	0	1	1	0	1	0	0	0	1	polyhalogenated benzene alicycles	OFR	7	high	1	0	0.863252
DTXSID20891513	1093632348	1093632-34-8	1,3,5,7,9,11-Hexabromocyclododecane	C12H18Br6	BrC1CC(Br)CC(Br)CC(Br)CC(Br)CC(Br)C1	qsar_ready_smiles	0	0	0	1	0	0	0	0	0	0	0	0	0	0	0	0	1	0	0	0	1	polyhalogenated alicycles		1	low	1	0	0.775045
DTXSID20108653	1195978938	1195978-93-8	Benzene, ethenyl-, polymer with 1,3-butadiene, brominated				0	0	0	0	1	0	1	0	0	0	1	0	0	0	1	0	0	0	1	0	1		polymeric	4	high	0	0	0
DTXSID70872771	1271168401	1271168-40-1	Melamine-(aluminium phosphate)	C6H14AlN12O10P3	[Al+3].NC1=NC(N)=NC(N)=N1.NC1=NC(N)=NC(N)=N1.OP([O-])(=O)OP([O-])(=O)OP(O)([O-])=O	canonical_smiles	0	0	0	0	0	1	0	0	0	0	0	0	0	0	0	0	0	0	0	1	1			1	low	0	0	0.937224
DTXSID90872773	1271172985	1271172-98-5	Diphosphoric acid, zinc salt, compd. with 1,​3,​5-​triazine-​2,​4,​6-​triamine (1:1:2)	C6H14N12O7P2Zn	NC1=NC(N)=NC(=[NH2+])N1.NC1=NC(N)=NC(=[NH2+])N1.[O-]P1(=O)O[Zn]OP([O-])(=O)O1	canonical_smiles	0	0	0	0	0	1	0	0	0	0	0	0	0	0	0	0	0	1	1	1	1			1	low	0	0	0.932995
DTXSID901018497	1372804766	1372804-76-6	Alkanes, C14-16, chloro				1	0	0	0	1	0	0	0	0	0	0	0	0	0	0	0	1	0	0	0	1	polyhalogenated aliphatic chains		1	low	0	0	0
DTXSID001016682	1373346907	1373346-90-7	dimethyl {[(4,6-dichloro-1,3,5-triazin-2-yl)oxy]methyl}phosphonate	C6H8Cl2N3O4P	COP(=O)(COC1=NC(Cl)=NC(Cl)=N1)OC	qsar_ready_smiles	0	0	0	1	0	0	0	0	0	0	0	0	0	0	0	0	1	0	0	0	1	polyhalogenated organophosphates		1	low	1	0	0.924472
DTXSID20894307	1401974240	1401974-24-0	Alkanes, C22-30-branched and linear, chloro				1	0	0	0	0	0	0	0	0	1	0	0	0	0	0	0	1	0	0	0	1	polyhalogenated aliphatic chains		1	low	0	0	0
DTXSID80894308	1402738526	1402738-52-6	Alkanes, C24-28, chloro				1	0	0	0	1	0	0	0	0	0	0	0	0	0	0	0	1	0	0	0	1	polyhalogenated aliphatic chains		1	low	0	0	0
DTXSID50894315	1417900969	1417900-96-9	Alkanes, C21-34-branched and linear, chloro				1	0	0	0	0	0	0	0	0	1	0	0	0	0	0	0	1	0	0	0	1	polyhalogenated aliphatic chains		1	low	0	0	0
DTXSID30860639	1852481276	1852481-27-6	2,3,4,5,6,8-Hexachlorodecane	C10H16Cl6	CCC(Cl)CC(Cl)C(Cl)C(Cl)C(Cl)C(C)Cl	qsar_ready_smiles	0	0	0	1	0	0	0	0	0	0	0	0	0	0	0	0	1	0	0	0	1	polyhalogenated aliphatic chains	Chlorinated Parrffin SCCP, see supplemental NAS note	1	low	1	0	0.857654
DTXSID301018499	2097144437	2097144-43-7	Alkanes, C20-28, chloro				1	0	0	0	1	0	0	0	0	0	0	0	0	0	0	0	1	0	0	0	1	polyhalogenated aliphatic chains		1	low	0	0	0
DTXSID601010963	2097144448	2097144-44-8	Slack Wax (petroleum), chloro				0	0	0	0	1	0	0	0	0	0	0	0	0	0	0	0	0	0	1	0	1		polymeric UVCB	1	low	0	0	0
DTXSID101018500	2097144459	2097144-45-9	Alkanes, C20-24, chloro				1	0	0	0	1	0	0	0	0	0	0	0	0	0	0	0	1	0	0	0	1	polyhalogenated aliphatic chains		1	low	0	0	0
DTXSID001010941	2097144460	2097144-46-0	Hexacosane, chloro derivs.				1	0	0	0	1	0	0	0	0	0	0	0	0	0	0	0	1	0	0	0	1	polyhalogenated aliphatic chains		1	low	0	0	0
DTXSID701010942	2097144471	2097144-47-1	Octacosane, chloro derivs.				1	0	0	0	1	0	0	0	0	0	0	0	0	0	0	0	1	0	0	0	1	polyhalogenated aliphatic chains		1	low	0	0	0
DTXSID401010943	2097144482	2097144-48-2	Octadecane, chloro derivs.				1	0	0	0	1	0	0	0	0	0	0	0	0	0	0	0	1	0	0	0	1	polyhalogenated aliphatic chains		1	low	0	0	0
DTXSID30949579	2167063570	2167063-57-0	1,2,3-Tribromo-4-[(prop-2-en-1-yl)oxy]benzene	C9H7Br3O	BrC1=C(Br)C(Br)=C(OCC=C)C=C1	qsar_ready_smiles	0	0	0	1	0	0	1	0	0	0	0	0	0	0	0	0	1	0	0	0	1	polyhalogenated phenol-aliphatic ether	This is an NAS chemical, previous CASRN was 26762-91-4 Currently reported in Dashboard as 2167063-57-0 DTXSID30949579	2	med	1	0	0.923933
DTXSID00956119	34621993	34621-99-3	Tetrakis(1-chloropropan-2-yl) ethane-1,2-diyl bis(phosphate)	C14H28Cl4O8P2	CC(CCl)OP(=O)(OCCOP(=O)(OC(C)CCl)OC(C)CCl)OC(C)CCl	qsar_ready_smiles	0	0	0	0	1	0	0	0	0	0	0	0	0	0	0	0	1	0	0	0	1	polyhalogenated organophosphates		1	low	0	0	0.938743
DTXSID00886624	63562334	63562-33-4	2-(10-Oxo-10H-9-oxa-10-phosphaphenanthren-10-ylmethyl)succinic acid (DDP)	C17H15O6P			0	0	0	0	1	0	0	0	0	0	0	0	0	0	0	0	0	1	0	0	1		See note under data sources 2 regarding PET vs. phosphorus additives in PET	1	low	0	0	0.4433
DTXSID30872414	NOCAS_872414	NOCAS_872414	Antimony & Antimony Compounds				0	0	0	0	0	1	0	0	0	0	0	0	0	0	0	0	0	0	1	1	0			1	low	0	0	0
DTXSID60872422	NOCAS_872422	NOCAS_872422	Long-chain chlorinated paraffins (C18-20)				1	0	0	1	1	0	0	0	0	0	0	0	0	1	0	0	1	0	0	0	1	polyhalogenated aliphatic chains		3	med	0	0	0
DTXSID20872423	NOCAS_872423	NOCAS_872423	Medium-chain chlorinated paraffins (C14-17)				1	0	0	1	0	0	0	0	0	0	0	0	0	1	0	0	1	0	0	0	1	polyhalogenated aliphatic chains		2	med	0	0	0
DTXSID90871387	40120749	40120-74-9	Tris (1,3- dichloropropyl) phosphate	C9H15Cl6O4P			0	0	0	0	0	0	0	0	0	0	0	0	0	0	1	0	1	0	0	0	1	polyhalogenated organophosphates	Added after SData Reviewer comments: Thought it was TDCPP (13674-87-8) during original extraction since almost all the data are for that chemical instead	1	low	0	0
DTXSID9024986	80079	80-07-9	4,4'-Dichlorodiphenyl sulfone	C12H8Cl2O2S			0	0	0	0	0	0	0	0	0	0	0	0	0	0	1	0	0	0	0	0	0		Added after SData Reviewer comments: chemists panel noted not a likely flame retardant because it is a chemical intermediate (CDR)	1	low	0	0	0.6907

## Sheet: 3_EPA_Bev_Annotated
COUNT	DTXSID	PREFERRED_NAME	CASRN	INCHIKEY	SMILES	QSAR_READY_SMILES	INCHI_STRING	MOLECULAR_FORMULA	AVERAGE_MASS	stripped_casrn	casrn	chemical_name	molecular_formula	smiles	smiles_type	is_ndiscrete_with_CX	is_ndiscrete_without_CX	is_uncommon_congener	us_cpsc	us_epa_oppt	us_epa_ord	danish_epa	ea_uk	who_ipcs	efsa	eu	biomonitoring_california	health_canada	bergman_2012	forward_bergman	bolinus_morgan_wilkie	is_ohfr	is_onhfr	is_polyfr	is_iofr	is_fr	nas_ofr_category	comments_integrated	n_agg_dsrc	dsrc_score	nas_report	nas_analog	qsur_score	In_Bev	In_CompTox
1	DTXSID001002372	Bis[(pentabromophenyl)methyl] 3,4,5,6-tetrabromobenzene-1,2-dicarboxylate	82001-21-6	NIMRNRQNVGDVEU-UHFFFAOYSA-N	BrC1=C(Br)C(Br)=C(COC(=O)C2=C(C(=O)OCC3=C(Br)C(Br)=C(Br)C(Br)=C3Br)C(Br)=C(Br)C(Br)=C2Br)C(Br)=C1Br	BrC1=C(Br)C(Br)=C(COC(=O)C2=C(C(=O)OCC3=C(Br)C(Br)=C(Br)C(Br)=C3Br)C(Br)=C(Br)C(Br)=C2Br)C(Br)=C1Br	InChI=1S/C22H4Br14O4/c23-7-3(8(24)14(30)19(35)13(7)29)1-39-21(37)5-6(12(28)18(34)17(33)11(5)27)22(38)40-2-4-9(25)15(31)20(36)16(32)10(4)26/h1-2H2_x000D_	C22H4Br14O4	1450.93	82001216	82001-21-6	Bis[(pentabromophenyl)methyl] 3,4,5,6-tetrabromobenzene-1,2-dicarboxylate	C22H4Br14O4	BrC1=C(Br)C(Br)=C(COC(=O)C2=C(C(=O)OCC3=C(Br)C(Br)=C(Br)C(Br)=C3Br)C(Br)=C(Br)C(Br)=C2Br)C(Br)=C1Br	qsar_ready_smiles	0	0	0	1	0	0	0	0	0	0	0	0	0	0	1	0	1	0	0	0	1	polyhalogenated phthalates/benzoates/imides		2	med	1	0	0.921917	1	1
2	DTXSID001010941	Hexacosane, chloro derivs.	2097144-46-0							2097144460	2097144-46-0	Hexacosane, chloro derivs.				1	0	0	0	1	0	0	0	0	0	0	0	0	0	0	0	1	0	0	0	1	polyhalogenated aliphatic chains		1	low	0	0	0	1	1
3	DTXSID001014486	Calcium molybdate(VI)	7789-82-4	ULPVNDJNTSDDLA-UHFFFAOYSA-N	[O--].[O--].[O--].[O--].[Ca++].[Mo+6]		InChI=1S/Ca.Mo.4O/q+2;+6;4*-2_x000D_	CaMoO4	200.02	7789824	7789-82-4	Calcium molybdate(VI)	CaMoO4	[O--].[O--].[O--].[O--].[Ca++].[Mo+6]	canonical_smiles	0	0	0	1	1	0	0	0	0	0	0	0	0	0	0	0	0	0	0	1	1			2	med	0	0	0.875242	1	1
4	DTXSID001016668	3,3',5,5'-Tetrabromobisphenol A bispropionate	37419-42-4	CHPHPONWLVLQCX-UHFFFAOYSA-N	CCC(=O)OC1=C(Br)C=C(C=C1Br)C(C)(C)C1=CC(Br)=C(OC(=O)CC)C(Br)=C1	CCC(=O)OC1=C(Br)C=C(C=C1Br)C(C)(C)C1=CC(Br)=C(OC(=O)CC)C(Br)=C1	InChI=1S/C21H20Br4O4/c1-5-17(26)28-19-13(22)7-11(8-14(19)23)21(3,4)12-9-15(24)20(16(25)10-12)29-18(27)6-2/h7-10H,5-6H2,1-4H3_x000D_	C21H20Br4O4	656.003	37419424	37419-42-4	3,3',5,5'-Tetrabromobisphenol A bispropionate	C21H20Br4O4	CCC(=O)OC1=C(Br)C=C(C=C1Br)C(C)(C)C1=CC(Br)=C(OC(=O)CC)C(Br)=C1	qsar_ready_smiles	0	0	0	1	0	1	1	0	0	1	0	0	0	1	1	0	1	0	0	0	1	polyhalogenated bisphenol aliphatics and functionalized		6	high	1	0	0.762208	1	1
5	DTXSID001016682	dimethyl {[(4,6-dichloro-1,3,5-triazin-2-yl)oxy]methyl}phosphonate	1373346-90-7	MPFOQCIRCMIBGD-UHFFFAOYSA-N	COP(=O)(COC1=NC(Cl)=NC(Cl)=N1)OC	COP(=O)(COC1=NC(Cl)=NC(Cl)=N1)OC	InChI=1S/C6H8Cl2N3O4P/c1-13-16(12,14-2)3-15-6-10-4(7)9-5(8)11-6/h3H2,1-2H3_x000D_	C6H8Cl2N3O4P	288.02	1373346907	1373346-90-7	dimethyl {[(4,6-dichloro-1,3,5-triazin-2-yl)oxy]methyl}phosphonate	C6H8Cl2N3O4P	COP(=O)(COC1=NC(Cl)=NC(Cl)=N1)OC	qsar_ready_smiles	0	0	0	1	0	0	0	0	0	0	0	0	0	0	0	0	1	0	0	0	1	polyhalogenated organophosphates		1	low	1	0	0.924472	1	1
6	DTXSID001016694	1-(2,3-dibromopropyl)-3,5-di(prop-2-en-1-yl)-1,3,5-triazinane-2,4,6-trione	57829-89-7	JNTWOIGTWXAQNP-UHFFFAOYSA-N	BrCC(Br)CN1C(=O)N(CC=C)C(=O)N(CC=C)C1=O	BrCC(Br)CN1C(=O)N(CC=C)C(=O)N(CC=C)C1=O	InChI=1/C12H15Br2N3O3/c1-3-5-15-10(18)16(6-4-2)12(20)17(11(15)19)8-9(14)7-13/h3-4,9H,1-2,5-8H2_x000D_	C12H15Br2N3O3	409.078	57829897	57829-89-7	1-(2,3-dibromopropyl)-3,5-di(prop-2-en-1-yl)-1,3,5-triazinane-2,4,6-trione	C12H15Br2N3O3	BrCC(Br)CN1C(=O)N(CC=C)C(=O)N(CC=C)C1=O	qsar_ready_smiles	0	0	0	1	0	0	1	0	0	1	1	0	0	1	1	0	1	0	0	0	1	polyhalogenated triazines		6	high	1	0	0.86393	1	1
7	DTXSID001016701	1,3-bis(2,3-dibromopropyl)-5-(prop-2-en-1-yl)-1,3,5-triazinane-2,4,6-trione	75795-16-3	ZOEUJZVRQCHHCW-UHFFFAOYSA-N	BrCC(Br)CN1C(=O)N(CC=C)C(=O)N(CC(Br)CBr)C1=O	BrCC(Br)CN1C(=O)N(CC=C)C(=O)N(CC(Br)CBr)C1=O	InChI=1/C12H15Br4N3O3/c1-2-3-17-10(20)18(6-8(15)4-13)12(22)19(11(17)21)7-9(16)5-14/h2,8-9H,1,3-7H2_x000D_	C12H15Br4N3O3	568.886	75795163	75795-16-3	1,3-bis(2,3-dibromopropyl)-5-(prop-2-en-1-yl)-1,3,5-triazinane-2,4,6-trione	C12H15Br4N3O3	BrCC(Br)CN1C(=O)N(CC=C)C(=O)N(CC(Br)CBr)C1=O	qsar_ready_smiles	0	0	0	1	0	0	1	0	0	1	1	0	0	1	1	0	1	0	0	0	1	polyhalogenated triazines		6	high	1	0	0.86393	1	1
8	DTXSID001016751	Octabromobiphenyl	27858-07-7					C12H2Br8	785.38	27858077	27858-07-7	Octabromobiphenyl		C1=CC(=C(C(=C1C2=C(C(=C(C(=C2Br)Br)Br)Br)Br)Br)Br)Br	pubchem_smiles	0	0	0	0	0	1	0	0	0	0	0	0	1	0	1	0	1	0	0	0	1	polyhalogenated benzenes		3	med	0	0	0.969686	1	1
9	DTXSID001017111	End capped and partially end capped brominated epoxy oligomer	139638-58-7							139638587	139638-58-7	End capped and partially end capped brominated epoxy oligomer				0	0	0	0	0	0	0	1	0	0	0	0	0	0	1	0	0	0	1	0	1		polymeric	2	med	0	0	0	1	1
10	DTXSID001018214	Aluminum sodium hydroxide (NaAl(OH)4)	12251-53-5	SVEIXENKLWYGIZ-UHFFFAOYSA-J	[OH-].[OH-].[OH-].[OH-].[Na+].[Al+3]		InChI=1S/Al.Na.4H2O/h;;4*1H2/q+3;+1;;;;/p-4_x000D_	AlH4NaO4	117.999	12251535	12251-53-5	Aluminium sodium tetrahydroxide	AlH4NaO4	[OH-].[OH-].[OH-].[OH-].[Na+].[Al+3]	canonical_smiles	0	0	0	0	0	1	0	0	0	0	1	0	0	0	0	0	0	0	0	1	1			2	med	0	0	0.820936	1	1
11	DTXSID00103429	Phosphonic acid, P-methyl-, dimethyl ester, polymer with oxirane and phosphorus oxide (P2O5)	70715-06-9							70715069	70715-06-9	Phosphonic acid, P-methyl-, dimethyl ester, polymer with oxirane and phosphorus oxide (P2O5)				0	0	0	0	0	0	0	1	0	0	0	0	0	0	0	0	0	0	1	0	1		polymeric	1	low	0	0	0	1	1
12	DTXSID00108393	Polyphosphoric acids, compds. with pyrolyzed melamine	880647-20-1							880647201	880647-20-1	Polyphosphoric acids, compds. with pyrolyzed melamine				0	0	0	0	1	0	0	0	0	0	0	0	0	0	0	0	0	1	1	0	1			1	low	0	0	0	1	1
13	DTXSID00164338	4,4',6,6'-Tetrabromo-2,2'-biphenyldiol	14957-65-4	ZNJKDCNQQCLEFG-UHFFFAOYSA-N	OC1=C(C(Br)=CC(Br)=C1)C1=C(O)C=C(Br)C=C1Br	OC1=C(C(Br)=CC(Br)=C1)C1=C(O)C=C(Br)C=C1Br	InChI=1S/C12H6Br4O2/c13-5-1-7(15)11(9(17)3-5)12-8(16)2-6(14)4-10(12)18/h1-4,17-18H_x000D_	C12H6Br4O2	501.794	14957654	14957-65-4	4,4',6,6'Tetrabromo2,2'biphenyldiol	C12H6Br4O2	OC1=C(C(Br)=CC(Br)=C1)C1=C(O)C=C(Br)C=C1Br	qsar_ready_smiles	0	0	0	0	0	0	0	0	0	0	0	0	0	0	1	0	1	0	0	0	1	polyhalogenated benzenes		1	low	0	0	0.851099	1	1
14	DTXSID00181969	Ethanol, 2-bromo-, phosphate (3:1)	27568-90-7	FFULTTXGZNPTQO-UHFFFAOYSA-N	BrCCOP(=O)(OCCBr)OCCBr	BrCCOP(=O)(OCCBr)OCCBr	InChI=1S/C6H12Br3O4P/c7-1-4-11-14(10,12-5-2-8)13-6-3-9/h1-6H2_x000D_	C6H12Br3O4P	418.844	27568907	27568-90-7	Ethanol, 2bromo, phosphate (3:1)	C6H12Br3O4P	BrCCOP(=O)(OCCBr)OCCBr	qsar_ready_smiles	0	0	0	0	0	0	0	0	0	0	0	0	0	0	1	0	1	0	0	0	1	polyhalogenated organophosphates		1	low	0	0	0.92907	1	1
15	DTXSID00196255	2,2',3,4,4',5,6,6'-Octabromodiphenyl ether	446255-54-5	YZABCBOJTHQTSX-UHFFFAOYSA-N	BrC1=CC(Br)=C(OC2=C(Br)C(Br)=C(Br)C(Br)=C2Br)C(Br)=C1	BrC1=CC(Br)=C(OC2=C(Br)C(Br)=C(Br)C(Br)=C2Br)C(Br)=C1	InChI=1S/C12H2Br8O/c13-3-1-4(14)11(5(15)2-3)21-12-9(19)7(17)6(16)8(18)10(12)20/h1-2H_x000D_	C12H2Br8O	801.379	446255545	446255-54-5	2,2',3,4,4',5,6,6'-Octabromodiphenyl ether	C12H2Br8O	BrC1=CC(Br)=C(OC2=C(Br)C(Br)=C(Br)C(Br)=C2Br)C(Br)=C1	qsar_ready_smiles	0	0	0	0	0	1	0	0	0	0	0	0	0	0	1	0	1	0	0	0	1	polyhalogenated diphenyl ethers		2	med	0	1	0.98377	1	1
16	DTXSID00199847	2,4-Dichlorodiphenyl ether	51892-26-3	KXIPYLZZJZMMPD-UHFFFAOYSA-N	ClC1=CC(Cl)=C(OC2=CC=CC=C2)C=C1	ClC1=CC(Cl)=C(OC2=CC=CC=C2)C=C1	InChI=1S/C12H8Cl2O/c13-9-6-7-12(11(14)8-9)15-10-4-2-1-3-5-10/h1-8H_x000D_	C12H8Cl2O	239.1	51892263	51892-26-3	2,4Dichlorodiphenyl ether	C12H8Cl2O	ClC1=CC(Cl)=C(OC2=CC=CC=C2)C=C1	qsar_ready_smiles	0	0	0	0	0	0	0	0	0	0	0	0	0	0	1	0	1	0	0	0	1	polyhalogenated diphenyl ethers		1	low	0	0	0.932772	1	1
17	DTXSID0020078	Ammonium chloride	12125-02-9	NLXLAEXVIDQMFP-UHFFFAOYSA-N	[NH4+].[Cl-]		InChI=1S/ClH.H3N/h1H;1H3_x000D_	ClH4N	53.49	12125029	12125-02-9	Ammonium chloride	ClH4N	[NH4+].[Cl-]	canonical_smiles	0	0	0	0	0	0	0	1	1	0	0	0	0	0	1	0	0	0	0	1	1			3	med	0	0	0.69292	1	1
18	DTXSID0020494	Dimethyl methylphosphonate	756-79-6	VONWDASPFIQPDY-UHFFFAOYSA-N	COP(C)(=O)OC	COP(C)(=O)OC	InChI=1S/C3H9O3P/c1-5-7(3,4)6-2/h1-3H3_x000D_	C3H9O3P	124.076	756796	756-79-6	Dimethyl methylphosphonate	C3H9O3P	COP(C)(=O)OC	qsar_ready_smiles	0	0	0	1	1	1	0	0	1	0	0	0	0	0	1	1	0	1	0	0	1			6	high	0	0	0.908774	1	1
19	DTXSID00207815	2,3,5,6,2',3',5',6'-Octabromobiphenyl	59080-41-0	IQIHDBRYKJLECA-UHFFFAOYSA-N	BrC1=CC(Br)=C(Br)C(=C1Br)C1=C(Br)C(Br)=CC(Br)=C1Br	BrC1=CC(Br)=C(Br)C(=C1Br)C1=C(Br)C(Br)=CC(Br)=C1Br	InChI=1S/C12H2Br8/c13-3-1-4(14)10(18)7(9(3)17)8-11(19)5(15)2-6(16)12(8)20/h1-2H_x000D_	C12H2Br8	785.38	59080410	59080-41-0	2,3,5,6,2',3',5',6'-Octabromobiphenyl	C12H2Br8	BrC1=CC(Br)=C(Br)C(=C1Br)C1=C(Br)C(Br)=CC(Br)=C1Br	qsar_ready_smiles	0	0	1	0	0	0	0	0	0	0	0	0	0	0	1	0	1	0	0	0	1	polyhalogenated benzenes		1	low	0	0	0.924704	1	1
20	DTXSID0021173	Firemaster FF-1	67774-32-7							67774327	67774-32-7	Firemaster FF-1		C1=C(C(=CC(=C1Br)Br)Br)C2=CC(=C(C=C2Br)Br)Br	pubchem_smiles	1	0	0	0	0	0	0	0	1	0	0	0	0	0	1	0	0	0	1	0	1			2	med	0	0	0	1	1
21	DTXSID0021331	Tetrakis(hydroxymethyl)phosphonium sulfate	55566-30-8	YIEDHPBKGZGLIK-UHFFFAOYSA-L	[O-]S([O-])(=O)=O.OC[P+](CO)(CO)CO.OC[P+](CO)(CO)CO	OCP(CO)(CO)CO	InChI=1S/2C4H12O4P.H2O4S/c2*5-1-9(2-6,3-7)4-8;1-5(2,3)4/h2*5-8H,1-4H2;(H2,1,2,3,4)/q2*+1;/p-2_x000D_	C8H24O12P2S	406.28	55566308	55566-30-8	Tetrakis(hydroxymethyl)phosphonium sulfate	C8H24O12P2S	OCP(CO)(CO)CO	qsar_ready_smiles	0	0	0	1	0	0	0	0	1	0	0	0	0	0	0	1	0	1	0	0	1			3	med	0	0	0.750605	1	1
22	DTXSID0021414	Tris(2-ethylhexyl) phosphate	78-42-2	GTVWRXDRKAHEAD-UHFFFAOYSA-N	CCCCC(CC)COP(=O)(OCC(CC)CCCC)OCC(CC)CCCC	CCCCC(CC)COP(=O)(OCC(CC)CCCC)OCC(CC)CCCC	InChI=1/C24H51O4P/c1-7-13-16-22(10-4)19-26-29(25,27-20-23(11-5)17-14-8-2)28-21-24(12-6)18-15-9-3/h22-24H,7-21H2,1-6H3_x000D_	C24H51O4P	434.642	78422	78-42-2	Tris(2-ethylhexyl) phosphate	C24H51O4P	CCCCC(CC)COP(=O)(OCC(CC)CCCC)OCC(CC)CCCC	qsar_ready_smiles	0	0	0	0	0	1	1	0	1	0	1	0	1	1	1	0	0	1	0	0	1		organic-non-halognated	7	high	0	0	0.923286	1	1
23	DTXSID00214802	Tris[2-(propan-2-yl)phenyl] phosphate	64532-95-2	LIPMRGQQBZJCTM-UHFFFAOYSA-N	CC(C)C1=CC=CC=C1OP(=O)(OC1=CC=CC=C1C(C)C)OC1=CC=CC=C1C(C)C	CC(C)C1=CC=CC=C1OP(=O)(OC1=CC=CC=C1C(C)C)OC1=CC=CC=C1C(C)C	InChI=1S/C27H33O4P/c1-19(2)22-13-7-10-16-25(22)29-32(28,30-26-17-11-8-14-23(26)20(3)4)31-27-18-12-9-15-24(27)21(5)6/h7-21H,1-6H3_x000D_	C27H33O4P	452.531	64532952	64532-95-2	Tris[2-(propan-2-yl)phenyl] phosphate	C27H33O4P	CC(C)C1=CC=CC=C1OP(=O)(OC1=CC=CC=C1C(C)C)OC1=CC=CC=C1C(C)C	qsar_ready_smiles	0	0	0	0	0	1	0	0	0	0	0	0	0	0	1	0	0	1	0	0	1			2	med	0	0	0.887289	1	1
24	DTXSID00219337	1,1'-Biphenyl, 2,2',3,4',5',6-hexabromo-	69278-59-7	IKIIHEWEIKDZIG-UHFFFAOYSA-N	BrC1=CC(Br)=C(Br)C=C1C1=C(Br)C=CC(Br)=C1Br	BrC1=CC(Br)=C(Br)C=C1C1=C(Br)C=CC(Br)=C1Br	InChI=1S/C12H4Br6/c13-6-1-2-7(14)12(18)11(6)5-3-9(16)10(17)4-8(5)15/h1-4H_x000D_	C12H4Br6	627.588	69278597	69278-59-7	1,1'-Biphenyl, 2,2',3,4',5',6-hexabromo-	C12H4Br6	BrC1=CC(Br)=C(Br)C=C1C1=C(Br)C=CC(Br)=C1Br	qsar_ready_smiles	0	0	1	0	0	0	0	0	1	0	0	0	0	0	0	0	1	0	0	0	1	polyhalogenated benzenes		1	low	0	1	0.924704	1	1
25	DTXSID0024553	Azodicarbonamide	123-77-3	XOZUGNYVDXMRKW-UHFFFAOYSA-N	NC(=O)N=NC(N)=O	NC(=O)N=NC(N)=O	InChI=1S/C2H4N4O2/c3-1(7)5-6-2(4)8/h(H2,3,7)(H2,4,8)_x000D_	C2H4N4O2	116.08	123773	123-77-3	Azodicarbonamide	C2H4N4O2	NC(=O)N=NC(N)=O	qsar_ready_smiles	0	0	0	0	0	1	0	0	0	0	0	0	0	0	0	0	0	1	0	0	1			1	low	0	0	0.262019	1	1
26	DTXSID0026252	Triphenyl phosphite	101-02-0	HVLLSGMXQDNUAL-UHFFFAOYSA-N	O(P(OC1=CC=CC=C1)OC1=CC=CC=C1)C1=CC=CC=C1	O(P(OC1=CC=CC=C1)OC1=CC=CC=C1)C1=CC=CC=C1	InChI=1S/C18H15O3P/c1-4-10-16(11-5-1)19-22(20-17-12-6-2-7-13-17)21-18-14-8-3-9-15-18/h1-15H_x000D_	C18H15O3P	310.289	101020	101-02-0	Triphenyl phosphite	C18H15O3P	O(P(OC1=CC=CC=C1)OC1=CC=CC=C1)C1=CC=CC=C1	qsar_ready_smiles	0	0	0	0	0	0	0	1	0	0	0	0	0	0	0	0	0	1	0	0	1			1	low	0	0	0.778199	1	1
27	DTXSID0026258	Tris(2-chloroethyl) phosphite	140-08-9	LUVCTYHBTXSAMX-UHFFFAOYSA-N	ClCCOP(OCCCl)OCCCl	ClCCOP(OCCCl)OCCCl	InChI=1S/C6H12Cl3O3P/c7-1-4-10-13(11-5-2-8)12-6-3-9/h1-6H2_x000D_	C6H12Cl3O3P	269.48	140089	140-08-9	Tris(2-chloroethyl) phosphite	C6H12Cl3O3P	ClCCOP(OCCCl)OCCCl	qsar_ready_smiles	0	0	0	1	0	0	0	0	1	0	0	0	0	0	1	0	1	0	0	0	1	polyhalogenated organophosphates		3	med	1	0	0.840175	1	1
28	DTXSID0028903	Tar acids, cresylic, Ph phosphates	68952-35-2							68952352	68952-35-2	Tar acids, cresylic, Ph phosphates				0	1	0	0	0	0	0	1	0	0	0	0	0	0	0	0	0	0	1	0	1		mixture	1	low	0	0	0	1	1
29	DTXSID0029557	Bis(2-chloro-1-methylethyl) 2-chloropropyl phosphate	76025-08-6	NISNGFDWZYZNPT-UHFFFAOYSA-N	CC(Cl)COP(=O)(OC(C)CCl)OC(C)CCl	CC(Cl)COP(=O)(OC(C)CCl)OC(C)CCl	InChI=1/C9H18Cl3O4P/c1-7(12)6-14-17(13,15-8(2)4-10)16-9(3)5-11/h7-9H,4-6H2,1-3H3_x000D_	C9H18Cl3O4P	327.56	76025086	76025-08-6	Bis(2-chloro-1-methylethyl) 2-chloropropyl phosphate	C9H18Cl3O4P	CC(Cl)COP(=O)(OC(C)CCl)OC(C)CCl	qsar_ready_smiles	0	0	0	1	0	0	0	0	0	0	0	0	0	0	0	0	1	0	0	0	1	polyhalogenated organophosphates		1	low	0	1	0.968606	1	1
30	DTXSID00477016	Benzene, 1,3-dibromo-2-phenoxy-	51930-04-2	MUVDKHMQIZJFTC-UHFFFAOYSA-N	BrC1=CC=CC(Br)=C1OC1=CC=CC=C1	BrC1=CC=CC(Br)=C1OC1=CC=CC=C1	InChI=1S/C12H8Br2O/c13-10-7-4-8-11(14)12(10)15-9-5-2-1-3-6-9/h1-8H_x000D_	C12H8Br2O	328.003	51930042	51930-04-2	Benzene, 1,3-dibromo-2-phenoxy-	C12H8Br2O	BrC1=CC=CC(Br)=C1OC1=CC=CC=C1	qsar_ready_smiles	0	0	0	0	0	1	0	0	0	0	0	0	0	0	1	0	1	0	0	0	1	polyhalogenated diphenyl ethers		2	med	0	1	0.928458	1	1
31	DTXSID0049814	Vinyl acetate ethylene copolymer	24937-78-8							24937788	24937-78-8	Vinyl acetate ethylene copolymer		CC(=O)OC=C.C=C	pubchem_smiles	0	0	0	0	0	1	0	0	0	0	0	0	0	0	0	0	0	0	1	0	1		polymeric	1	low	0	0	0.492216	1	1
32	DTXSID0050471	Barium sulfate	7727-43-7	TZCXTZWJZNENPQ-UHFFFAOYSA-L	[Ba++].[O-]S([O-])(=O)=O		InChI=1S/Ba.H2O4S/c;1-5(2,3)4/h;(H2,1,2,3,4)/q+2;/p-2_x000D_	BaO4S	233.38	7727437	7727-43-7	Barium sulfate	BaO4S	[Ba++].[O-]S([O-])(=O)=O	canonical_smiles	0	0	0	0	0	1	0	0	0	0	0	0	0	0	0	0	0	0	0	1	1			1	low	0	0	0.77546	1	1
33	DTXSID0052679	Aluminium hydroxide oxide	24623-77-6	FAHBNUUHRFUEAI-UHFFFAOYSA-M	O[Al]=O		InChI=1S/Al.H2O.O/h;1H2;/q+1;;/p-1_x000D_	AlHO2	59.988	24623776	24623-77-6	Aluminium hydroxide oxide	C14H7NaO7S	OC1=C(O)C2=C(C=C1S(O)(=O)=O)C(=O)C1=C(C=CC=C1)C2=O	qsar_ready_smiles	0	0	0	0	0	1	0	1	0	0	0	0	0	0	0	0	0	0	0	1	1			2	med	0	0	0.459325	1	1
34	DTXSID0052700	2,2'-[(1-Methylethylidene)bis[(2,6-dibromo-4,1-phenylene)oxymethylene]]bis[oxirane]	3072-84-2	ZJRAAAWYHORFHN-UHFFFAOYSA-N	CC(C)(C1=CC(Br)=C(OCC2CO2)C(Br)=C1)C1=CC(Br)=C(OCC2CO2)C(Br)=C1	CC(C)(C1=CC(Br)=C(OCC2CO2)C(Br)=C1)C1=CC(Br)=C(OCC2CO2)C(Br)=C1	InChI=1/C21H20Br4O4/c1-21(2,11-3-15(22)19(16(23)4-11)28-9-13-7-26-13)12-5-17(24)20(18(25)6-12)29-10-14-8-27-14/h3-6,13-14H,7-10H2,1-2H3_x000D_	C21H20Br4O4	656.003	3072842	3072-84-2	2,2'-[(1-Methylethylidene)bis[(2,6-dibromo-4,1-phenylene)oxymethylene]]bis[oxirane]	C21H20Br4O4	CC(C)(C1=CC(Br)=C(OCC2CO2)C(Br)=C1)C1=CC(Br)=C(OCC2CO2)C(Br)=C1	qsar_ready_smiles	0	0	0	1	0	1	1	1	0	1	1	0	0	1	1	0	1	0	0	0	1	polyhalogenated bisphenol aliphatics and functionalized		8	high	1	0	0.817281	1	1
35	DTXSID0052702	Dechlorane 602	31107-44-5	CDBKZZACXQLFMK-DSCPOPHVSA-N	[H][C@]12O[C@]3([H])[C@]([H])([C@@]1([H])[C@]1(Cl)C(Cl)=C(Cl)[C@@]2(Cl)C1(Cl)Cl)[C@]1(Cl)C(Cl)=C(Cl)[C@@]3(Cl)C1(Cl)Cl	[H][C@]12O[C@]3([H])[C@]([H])([C@@]1([H])[C@]1(Cl)C(Cl)=C(Cl)[C@@]2(Cl)C1(Cl)Cl)[C@]1(Cl)C(Cl)=C(Cl)[C@@]3(Cl)C1(Cl)Cl	InChI=1S/C14H4Cl12O/c15-3-5(17)11(21)7-1(9(3,19)13(11,23)24)2-8(27-7)12(22)6(18)4(16)10(2,20)14(12,25)26/h1-2,7-8H/t1-,2+,7+,8-,9-,10-,11-,12-/m0/s1_x000D_	C14H4Cl12O	613.59	31107445	31107-44-5	1,2,3,4,6,7,8,9,10,10,11,11-dodecachloro-1,4,4a,5a,6,9,9a,9b-octahydro-1,4:6,9-dimethanodibenzofuran	C14H4Cl12O	ClC1=C(Cl)C2(Cl)C3C(OC4C3C3(Cl)C(Cl)=C(Cl)C4(Cl)C3(Cl)Cl)C1(Cl)C2(Cl)Cl	qsar_ready_smiles	0	0	0	1	0	1	0	0	1	0	1	0	0	1	1	0	1	0	0	0	1	polyhalogenated carbocycles		6	high	1	0	0.780304	1	1
36	DTXSID0052708	4,4'-Sulphonylbis[2,6-dibromophenol]	39635-79-5	JHJUYGMZIWDHMO-UHFFFAOYSA-N	OC1=C(Br)C=C(C=C1Br)S(=O)(=O)C1=CC(Br)=C(O)C(Br)=C1	OC1=C(Br)C=C(C=C1Br)S(=O)(=O)C1=CC(Br)=C(O)C(Br)=C1	InChI=1S/C12H6Br4O4S/c13-7-1-5(2-8(14)11(7)17)21(19,20)6-3-9(15)12(18)10(16)4-6/h1-4,17-18H_x000D_	C12H6Br4O4S	565.85	39635795	39635-79-5	4,4'-Sulphonylbis[2,6-dibromophenol]	C12H6Br4O4S	OC1=C(Br)C=C(C=C1Br)S(=O)(=O)C1=CC(Br)=C(O)C(Br)=C1	qsar_ready_smiles	0	0	0	1	0	1	1	0	1	0	0	0	0	1	1	0	1	0	0	0	1	polyhalogenated phenol derivatives		6	high	1	0	0.720005	1	1
37	DTXSID0052750	1,2,5,6-Tetrabromocyclooctane	3194-57-8	RZLXIANUDLLFHN-UHFFFAOYSA-N	BrC1CCC(Br)C(Br)CCC1Br	BrC1CCC(Br)C(Br)CCC1Br	InChI=1/C8H12Br4/c9-5-1-2-6(10)8(12)4-3-7(5)11/h5-8H,1-4H2_x000D_	C8H12Br4	427.8	3194578	3194-57-8	1,2,5,6-Tetrabromocyclooctane	C8H12Br4	BrC1CCC(Br)C(Br)CCC1Br	qsar_ready_smiles	0	0	0	1	1	1	1	1	0	1	1	0	1	1	1	1	1	0	0	0	1	polyhalogenated alicycles	OFR	11	high	1	0	0.808216	1	1
38	DTXSID0058300	Boron zinc oxide (B6Zn2O11)	12767-90-7	OSHGZAHTGPVONH-UHFFFAOYSA-N	[B+3].[B+3].[B+3].[B+3].[B+3].[B+3].[O--].[O--].[O--].[O--].[O--].[O--].[O--].[O--].[O--].[O-][Zn+].[O-][Zn+]		InChI=1S/6B.11O.2Zn/q6*+3;9*-2;2*-1;2*+1_x000D_	B6O11Zn2	371.61	12767907	12767-90-7	Zinc borate (ZnO 3 2B2O3)	B6O11Zn2	[B+3].[B+3].[B+3].[B+3].[B+3].[B+3].[O--].[O--].[O--].[O--].[O--].[O--].[O--].[O--].[O--].[O-][Zn+].[O-][Zn+]	canonical_smiles	0	0	0	0	0	1	0	0	0	0	1	0	0	0	0	1	0	0	0	1	1			3	med	0	0	0.829084	1	1
39	DTXSID00583560	1,3-Dibromo-5-(3-bromophenoxy)benzene	147217-79-6	XUKPJLVONRTECE-UHFFFAOYSA-N	BrC1=CC=CC(OC2=CC(Br)=CC(Br)=C2)=C1	BrC1=CC=CC(OC2=CC(Br)=CC(Br)=C2)=C1	InChI=1S/C12H7Br3O/c13-8-2-1-3-11(5-8)16-12-6-9(14)4-10(15)7-12/h1-7H_x000D_	C12H7Br3O	406.899	147217796	147217-79-6	1,3-Dibromo-5-(3-bromophenoxy)benzene	C12H7Br3O	BrC1=CC=CC(OC2=CC(Br)=CC(Br)=C2)=C1	qsar_ready_smiles	0	0	1	0	0	1	0	0	0	0	0	0	0	0	0	0	1	0	0	0	1	polyhalogenated diphenyl ethers		1	low	0	0	0.889054	1	1
40	DTXSID0058691	Tris(tribromoneopentyl)phosphate	19186-97-1	BHYQWBKCXBXPKM-UHFFFAOYSA-N	BrCC(CBr)(CBr)COP(=O)(OCC(CBr)(CBr)CBr)OCC(CBr)(CBr)CBr	BrCC(CBr)(CBr)COP(=O)(OCC(CBr)(CBr)CBr)OCC(CBr)(CBr)CBr	InChI=1S/C15H24Br9O4P/c16-1-13(2-17,3-18)10-26-29(25,27-11-14(4-19,5-20)6-21)28-12-15(7-22,8-23)9-24/h1-12H2_x000D_	C15H24Br9O4P	1018.46	19186971	19186-97-1	Tris(tribromoneopentyl)phosphate	C15H24Br9O4P	BrCC(CBr)(CBr)COP(=O)(OCC(CBr)(CBr)CBr)OCC(CBr)(CBr)CBr	qsar_ready_smiles	0	0	0	1	1	1	1	1	1	1	1	0	0	1	1	0	1	0	0	0	1	polyhalogenated organophosphates	OFR	10	high	1	0	0.949822	1	1
41	DTXSID0058695	2,4,6-Tris-(2,4,6-tribromophenoxy)-1,3,5-triazine	25713-60-4	BDFBPPCACYFGFA-UHFFFAOYSA-N	BrC1=CC(Br)=C(OC2=NC(OC3=C(Br)C=C(Br)C=C3Br)=NC(OC3=C(Br)C=C(Br)C=C3Br)=N2)C(Br)=C1	BrC1=CC(Br)=C(OC2=NC(OC3=C(Br)C=C(Br)C=C3Br)=NC(OC3=C(Br)C=C(Br)C=C3Br)=N2)C(Br)=C1	InChI=1S/C21H6Br9N3O3/c22-7-1-10(25)16(11(26)2-7)34-19-31-20(35-17-12(27)3-8(23)4-13(17)28)33-21(32-19)36-18-14(29)5-9(24)6-15(18)30/h1-6H_x000D_	C21H6Br9N3O3	1067.43	25713604	25713-60-4	2,4,6-Tris-(2,4,6-tribromophenoxy)-1,3,5-triazine	C21H6Br9N3O3	BrC1=CC(Br)=C(OC2=NC(OC3=C(Br)C=C(Br)C=C3Br)=NC(OC3=C(Br)C=C(Br)C=C3Br)=N2)C(Br)=C1	qsar_ready_smiles	0	0	0	1	1	1	1	1	1	1	1	0	1	1	1	0	1	0	0	0	1	polyhalogenated triazines	OFR	11	high	1	0	0.910648	1	1
42	DTXSID0060561	2,6-Dibromophenol	608-33-3	SSIZLKDLDKIHEV-UHFFFAOYSA-N	OC1=C(Br)C=CC=C1Br	OC1=C(Br)C=CC=C1Br	InChI=1S/C6H4Br2O/c7-4-2-1-3-5(8)6(4)9/h1-3,9H_x000D_	C6H4Br2O	251.905	608333	608-33-3	Phenol, 2,6-dibromo-	C6H4Br2O	OC1=C(Br)C=CC=C1Br	qsar_ready_smiles	0	0	0	0	0	0	0	0	0	0	0	0	0	0	1	0	1	0	0	0	1	polyhalogenated phenol derivatives		1	low	0	1	0.770364	1	1
43	DTXSID0066406	Dimethyl propylphosphonate	18755-43-6	YWDFOLFVOVCBIU-UHFFFAOYSA-N	CCCP(=O)(OC)OC	CCCP(=O)(OC)OC	InChI=1S/C5H13O3P/c1-4-5-9(6,7-2)8-3/h4-5H2,1-3H3_x000D_	C5H13O3P	152.13	18755436	18755-43-6	Dimethyl propylphosphonate	C5H13O3P	CCCP(=O)(OC)OC	qsar_ready_smiles	0	0	0	0	1	1	0	1	0	0	1	0	0	0	0	0	0	1	0	0	1			4	high	0	0	0.914668	1	1
44	DTXSID0075108	1,1'-Biphenyl, 3,3',5,5'-tetrabromo-	16400-50-3	FXJXZYWFJAXIJX-UHFFFAOYSA-N	BrC1=CC(=CC(Br)=C1)C1=CC(Br)=CC(Br)=C1	BrC1=CC(=CC(Br)=C1)C1=CC(Br)=CC(Br)=C1	InChI=1S/C12H6Br4/c13-9-1-7(2-10(14)5-9)8-3-11(15)6-12(16)4-8/h1-6H_x000D_	C12H6Br4	469.796	16400503	16400-50-3	1,1'-Biphenyl, 3,3',5,5'-tetrabromo-	C12H6Br4	BrC1=CC(=CC(Br)=C1)C1=CC(Br)=CC(Br)=C1	qsar_ready_smiles	0	0	0	1	0	1	0	0	0	1	0	0	0	0	1	0	1	0	0	0	1	polyhalogenated benzenes		4	high	1	0	0.806189	1	1
45	DTXSID00872668	Alkanes, C16-​35, chloro	85049-26-9							85049269	85049-26-9	Alkanes, C16-​35, chloro				1	0	0	0	0	0	0	0	1	0	0	0	0	0	0	0	1	0	0	0	1	polyhalogenated aliphatic chains		1	low	0	0	0	1	1
46	DTXSID00872789	Tris(diethylphosphinato)aluminium	225789-38-8	XSAOTYCWGCRGCP-UHFFFAOYSA-K	[Al+3].CCP([O-])(=O)CC.CCP([O-])(=O)CC.CCP([O-])(=O)CC	CCP(O)(=O)CC	InChI=1S/3C4H11O2P.Al/c3*1-3-7(5,6)4-2;/h3*3-4H2,1-2H3,(H,5,6);/q;;;+3/p-3_x000D_	C12H30AlO6P3	390.269	225789388	225789-38-8	Aluminum diethylphosphinate	C12H30AlO6P3	CCP(O)(=O)CC	qsar_ready_smiles	0	0	0	0	1	1	0	0	0	0	0	0	0	0	1	1	0	0	0	1	1		inorganic	4	high	0	0	0.855979	1	1
47	DTXSID00872800	Phenol, 4,4'-(1-methylethylidene)bis[2,6-dibromo-, polymer with carbonic dichloride, bis(2,4,6-tribromophenyl) ester	71342-77-3							71342773	71342-77-3	Phenol, 4,4'-(1-methylethylidene)bis[2,6-dibromo-, polymer with carbonic dichloride, bis(2,4,6-tribromophenyl) ester		CC(C)(C1=CC(=C(C(=C1)Br)O)Br)C2=CC(=C(C(=C2)Br)O)Br.C1=C(C=C(C(=C1Br)O)Br)Br.C(=O)(Cl)Cl	pubchem_smiles	0	0	0	0	0	1	1	1	1	0	0	0	0	0	1	1	0	0	1	0	1		polymeric	6	high	0	0	0	1	1
48	DTXSID00873771	(+/-)-α-Hexabromocyclododecane	134237-50-6	DEIGXXQKDWULML-PQTSNVLCSA-N	Br[C@H]1CC[C@@H](Br)[C@H](Br)CC[C@H](Br)[C@H](Br)CC[C@H]1Br	Br[C@H]1CC[C@@H](Br)[C@H](Br)CC[C@H](Br)[C@H](Br)CC[C@H]1Br,BrC1CCC(Br)C(Br)CCC(Br)C(Br)CCC1Br	InChI=1/C12H18Br6/c13-7-1-2-8(14)10(16)5-6-12(18)11(17)4-3-9(7)15/h7-12H,1-6H2/t7-,8-,9+,10+,11-,12-/s2_x000D_	C12H18Br6	641.7	134237506	134237-50-6	(+/-)-α-Hexabromocyclododecane	C12H18Br6	BrC1CCC(Br)C(Br)CCC(Br)C(Br)CCC1Br	qsar_ready_smiles	0	0	0	1	0	1	0	0	0	1	0	1	0	0	1	0	1	0	0	0	1	polyhalogenated alicycles		5	high	1	0	0.808216	1	1
49	DTXSID00879854	BDE-19	147217-73-0	YDFQHBRKURQGAH-UHFFFAOYSA-N	BrC1=CC=CC=C1OC1=C(Br)C=CC=C1Br	BrC1=CC=CC=C1OC1=C(Br)C=CC=C1Br	InChI=1S/C12H7Br3O/c13-8-4-1-2-7-11(8)16-12-9(14)5-3-6-10(12)15/h1-7H_x000D_	C12H7Br3O	406.899	147217730	147217-73-0	BDE-19	C12H7Br3O	BrC1=CC=CC=C1OC1=C(Br)C=CC=C1Br	qsar_ready_smiles	0	0	1	0	0	1	0	0	0	0	0	0	0	0	0	0	1	0	0	0	1	polyhalogenated diphenyl ethers		1	low	0	0	0.913979	1	1
50	DTXSID00879859	BDE-24	218304-36-0	GFLRHBRMAZDOIG-UHFFFAOYSA-N	BrC1=C(Br)C(OC2=CC=CC=C2)=C(Br)C=C1	BrC1=C(Br)C(OC2=CC=CC=C2)=C(Br)C=C1	InChI=1S/C12H7Br3O/c13-9-6-7-10(14)12(11(9)15)16-8-4-2-1-3-5-8/h1-7H_x000D_	C12H7Br3O	406.899	218304360	218304-36-0	BDE-24	C12H7Br3O	BrC1=C(Br)C(OC2=CC=CC=C2)=C(Br)C=C1	qsar_ready_smiles	0	0	1	0	0	1	0	0	0	0	0	0	0	0	0	0	1	0	0	0	1	polyhalogenated diphenyl ethers		1	low	0	0	0.966759	1	1
51	DTXSID00879874	BDE-50	446254-23-5	FXUAKFRJBKFDSY-UHFFFAOYSA-N	BrC1=CC(Br)=C(OC2=C(Br)C=CC=C2)C(Br)=C1	BrC1=CC(Br)=C(OC2=C(Br)C=CC=C2)C(Br)=C1	InChI=1S/C12H6Br4O/c13-7-5-9(15)12(10(16)6-7)17-11-4-2-1-3-8(11)14/h1-6H_x000D_	C12H6Br4O	485.795	446254235	446254-23-5	BDE-50	C12H6Br4O	BrC1=CC(Br)=C(OC2=C(Br)C=CC=C2)C(Br)=C1	qsar_ready_smiles	0	0	1	0	0	1	0	0	0	0	0	0	0	0	0	0	1	0	0	0	1	polyhalogenated diphenyl ethers		1	low	0	0	0.950471	1	1
52	DTXSID00879879	BDE-57	337513-82-3	CSIFWDKYUJLQEB-UHFFFAOYSA-N	BrC1=CC=CC(OC2=CC(Br)=CC(Br)=C2Br)=C1	BrC1=CC=CC(OC2=CC(Br)=CC(Br)=C2Br)=C1	InChI=1S/C12H6Br4O/c13-7-2-1-3-9(4-7)17-11-6-8(14)5-10(15)12(11)16/h1-6H_x000D_	C12H6Br4O	485.795	337513823	337513-82-3	BDE-57	C12H6Br4O	BrC1=CC=CC(OC2=CC(Br)=CC(Br)=C2Br)=C1	qsar_ready_smiles	0	0	1	0	0	1	0	0	0	0	0	0	0	0	0	0	1	0	0	0	1	polyhalogenated diphenyl ethers		1	low	0	0	0.959707	1	1
53	DTXSID00879894	BDE-74	446254-42-8	LXCFDVVDUVPAGR-UHFFFAOYSA-N	BrC1=CC=C(OC2=CC(Br)=C(Br)C=C2Br)C=C1	BrC1=CC=C(OC2=CC(Br)=C(Br)C=C2Br)C=C1	InChI=1S/C12H6Br4O/c13-7-1-3-8(4-2-7)17-12-6-10(15)9(14)5-11(12)16/h1-6H_x000D_	C12H6Br4O	485.795	446254428	446254-42-8	BDE-74	C12H6Br4O	BrC1=CC=C(OC2=CC(Br)=C(Br)C=C2Br)C=C1	qsar_ready_smiles	0	0	1	0	0	1	0	0	0	0	0	0	0	0	0	0	1	0	0	0	1	polyhalogenated diphenyl ethers		1	low	0	0	0.960251	1	1
54	DTXSID00879899	BDE-81	446254-50-8	ULFOIXCXIWHJDS-UHFFFAOYSA-N	BrC1=CC=C(OC2=CC(Br)=C(Br)C(Br)=C2)C=C1	BrC1=CC=C(OC2=CC(Br)=C(Br)C(Br)=C2)C=C1	InChI=1S/C12H6Br4O/c13-7-1-3-8(4-2-7)17-9-5-10(14)12(16)11(15)6-9/h1-6H_x000D_	C12H6Br4O	485.795	446254508	446254-50-8	BDE-81	C12H6Br4O	BrC1=CC=C(OC2=CC(Br)=C(Br)C(Br)=C2)C=C1	qsar_ready_smiles	0	0	1	0	0	1	0	0	0	0	0	0	0	0	0	0	1	0	0	0	1	polyhalogenated diphenyl ethers		1	low	0	0	0.959305	1	1
55	DTXSID00879910	BDE-95	446254-62-2	BZDYRALIEYVMEP-UHFFFAOYSA-N	BrC1=CC(OC2=C(Br)C=CC(Br)=C2Br)=C(Br)C=C1	BrC1=CC(OC2=C(Br)C=CC(Br)=C2Br)=C(Br)C=C1	InChI=1S/C12H5Br5O/c13-6-1-2-7(14)10(5-6)18-12-9(16)4-3-8(15)11(12)17/h1-5H_x000D_	C12H5Br5O	564.691	446254622	446254-62-2	BDE-95	C12H5Br5O	BrC1=CC(OC2=C(Br)C=CC(Br)=C2Br)=C(Br)C=C1	qsar_ready_smiles	0	0	1	0	0	1	0	0	0	0	0	0	0	0	0	0	1	0	0	0	1	polyhalogenated diphenyl ethers		1	low	0	0	0.959707	1	1
56	DTXSID00879915	BDE-103	446254-67-7	RJEMKRNASVHYKR-UHFFFAOYSA-N	BrC1=CC=C(Br)C(OC2=C(Br)C=C(Br)C=C2Br)=C1	BrC1=CC=C(Br)C(OC2=C(Br)C=C(Br)C=C2Br)=C1	InChI=1S/C12H5Br5O/c13-6-1-2-8(15)11(5-6)18-12-9(16)3-7(14)4-10(12)17/h1-5H_x000D_	C12H5Br5O	564.691	446254677	446254-67-7	BDE-103	C12H5Br5O	BrC1=CC=C(Br)C(OC2=C(Br)C=C(Br)C=C2Br)=C1	qsar_ready_smiles	0	0	1	0	0	1	0	0	0	0	0	0	0	0	0	0	1	0	0	0	1	polyhalogenated diphenyl ethers		1	low	0	0	0.963587	1	1
57	DTXSID00879930	BDE-122	446254-82-6	CDNHGSPFIUITTN-UHFFFAOYSA-N	BrC1=CC=CC(OC2=CC(Br)=C(Br)C(Br)=C2)=C1Br	BrC1=CC=CC(OC2=CC(Br)=C(Br)C(Br)=C2)=C1Br	InChI=1S/C12H5Br5O/c13-7-2-1-3-10(12(7)17)18-6-4-8(14)11(16)9(15)5-6/h1-5H_x000D_	C12H5Br5O	564.691	446254826	446254-82-6	BDE-122	C12H5Br5O	BrC1=CC=CC(OC2=CC(Br)=C(Br)C(Br)=C2)=C1Br	qsar_ready_smiles	0	0	1	0	0	1	0	0	0	0	0	0	0	0	0	0	1	0	0	0	1	polyhalogenated diphenyl ethers		1	low	0	0	0.973155	1	1
58	DTXSID00879935	BDE-129	446254-87-1	PRNCVYAUCSGSOE-UHFFFAOYSA-N	BrC1=CC(OC2=CC=CC(Br)=C2Br)=C(Br)C(Br)=C1Br	BrC1=CC(OC2=CC=CC(Br)=C2Br)=C(Br)C(Br)=C1Br	InChI=1S/C12H4Br6O/c13-5-2-1-3-7(9(5)15)19-8-4-6(14)10(16)12(18)11(8)17/h1-4H_x000D_	C12H4Br6O	643.587	446254871	446254-87-1	BDE-129	C12H4Br6O	BrC1=CC(OC2=CC=CC(Br)=C2Br)=C(Br)C(Br)=C1Br	qsar_ready_smiles	0	0	1	0	0	1	0	0	0	0	0	0	0	0	0	0	1	0	0	0	1	polyhalogenated diphenyl ethers		1	low	0	0	0.975126	1	1
59	DTXSID00879950	BDE-147	116995-33-6	OWBKWMDBTWHGHS-UHFFFAOYSA-N	BrC1=CC(Br)=C(OC2=C(Br)C(Br)=CC(Br)=C2Br)C=C1	BrC1=CC(Br)=C(OC2=C(Br)C(Br)=CC(Br)=C2Br)C=C1	InChI=1S/C12H4Br6O/c13-5-1-2-9(6(14)3-5)19-12-10(17)7(15)4-8(16)11(12)18/h1-4H_x000D_	C12H4Br6O	643.587	116995336	116995-33-6	BDE-147	C12H4Br6O	BrC1=CC(Br)=C(OC2=C(Br)C(Br)=CC(Br)=C2Br)C=C1	qsar_ready_smiles	0	0	1	0	0	1	0	0	0	0	0	0	0	0	0	0	1	0	0	0	1	polyhalogenated diphenyl ethers		1	low	0	0	0.960251	1	1
60	DTXSID00879955	BDE-152	446255-07-8	BYBJJARTBKUIJD-UHFFFAOYSA-N	BrC1=CC(Br)=C(Br)C(OC2=C(Br)C=CC=C2Br)=C1Br	BrC1=CC(Br)=C(Br)C(OC2=C(Br)C=CC=C2Br)=C1Br	InChI=1S/C12H4Br6O/c13-5-2-1-3-6(14)11(5)19-12-9(17)7(15)4-8(16)10(12)18/h1-4H_x000D_	C12H4Br6O	643.587	446255078	446255-07-8	BDE-152	C12H4Br6O	BrC1=CC(Br)=C(Br)C(OC2=C(Br)C=CC=C2Br)=C1Br	qsar_ready_smiles	0	0	1	0	0	1	0	0	0	0	0	0	0	0	0	0	1	0	0	0	1	polyhalogenated diphenyl ethers		1	low	0	0	0.959707	1	1
61	DTXSID00879970	BDE-172	407606-59-1	DSRRSKFMOJQETR-UHFFFAOYSA-N	BrC1=CC(OC2=CC(Br)=C(Br)C(Br)=C2Br)=C(Br)C(Br)=C1	BrC1=CC(OC2=CC(Br)=C(Br)C(Br)=C2Br)=C(Br)C(Br)=C1	InChI=1S/C12H3Br7O/c13-4-1-5(14)9(16)7(2-4)20-8-3-6(15)10(17)12(19)11(8)18/h1-3H_x000D_	C12H3Br7O	722.483	407606591	407606-59-1	BDE-172	C12H3Br7O	BrC1=CC(OC2=CC(Br)=C(Br)C(Br)=C2Br)=C(Br)C(Br)=C1	qsar_ready_smiles	0	0	1	0	0	1	0	0	0	0	0	0	0	0	0	0	1	0	0	0	1	polyhalogenated diphenyl ethers		1	low	0	0	0.975126	1	1
62	DTXSID00879975	BDE-178	446255-24-9	UWUVZUPEEORCRG-UHFFFAOYSA-N	BrC1=CC(Br)=C(Br)C(OC2=C(Br)C(Br)=CC(Br)=C2Br)=C1	BrC1=CC(Br)=C(Br)C(OC2=C(Br)C(Br)=CC(Br)=C2Br)=C1	InChI=1S/C12H3Br7O/c13-4-1-5(14)9(17)8(2-4)20-12-10(18)6(15)3-7(16)11(12)19/h1-3H_x000D_	C12H3Br7O	722.483	446255249	446255-24-9	BDE-178	C12H3Br7O	BrC1=CC(Br)=C(Br)C(OC2=C(Br)C(Br)=CC(Br)=C2Br)=C1	qsar_ready_smiles	0	0	1	0	0	1	0	0	0	0	0	0	0	0	0	0	1	0	0	0	1	polyhalogenated diphenyl ethers		1	low	0	0	0.959707	1	1
63	DTXSID00886624	Butanedioic acid, 2-[(6-oxido-6H-dibenz[c,e][1,2]oxaphosphorin-6-yl)methyl]-	63562-33-4	XZAXQWXHBDKYJI-UHFFFAOYSA-N	OC(=O)CC(CP1(=O)OC2=C(C=CC=C2)C2=C1C=CC=C2)C(O)=O	OC(=O)CC(CP1(=O)OC2=C(C=CC=C2)C2=C1C=CC=C2)C(O)=O	InChI=1/C17H15O6P/c18-16(19)9-11(17(20)21)10-24(22)15-8-4-2-6-13(15)12-5-1-3-7-14(12)23-24/h1-8,11H,9-10H2,(H,18,19)(H,20,21)_x000D_	C17H15O6P	346.275	63562334	63562-33-4	2-(10-Oxo-10H-9-oxa-10-phosphaphenanthren-10-ylmethyl)succinic acid (DDP)	C17H15O6P			0	0	0	0	1	0	0	0	0	0	0	0	0	0	0	0	0	1	0	0	1		See note under data sources 2 regarding PET vs. phosphorus additives in PET	1	low	0	0	0.4433	1	1
64	DTXSID00889812	Benzenesulfonic acid, 3,3'-sulfonylbis-, potassium salt (1:2)	63316-33-6	SCIXRAVJLLWCDJ-UHFFFAOYSA-L	[K+].[K+].[O-]S(=O)(=O)C1=CC(=CC=C1)S(=O)(=O)C1=CC=CC(=C1)S([O-])(=O)=O	OS(=O)(=O)C1=CC(=CC=C1)S(=O)(=O)C1=CC(=CC=C1)S(O)(=O)=O	InChI=1S/C12H10O8S3.2K/c13-21(14,9-3-1-5-11(7-9)22(15,16)17)10-4-2-6-12(8-10)23(18,19)20;;/h1-8H,(H,15,16,17)(H,18,19,20);;/q;2*+1/p-2_x000D_	C12H8K2O8S3	454.56	63316336	63316-33-6	Benzenesulfonic acid, 3,3'-sulfonylbis-, potassium salt (1:2)	C12H8K2O8S3	OS(=O)(=O)C1=CC(=CC=C1)S(=O)(=O)C1=CC(=CC=C1)S(O)(=O)=O	qsar_ready_smiles	0	1	0	0	1	1	0	0	0	0	0	0	0	0	0	0	0	0	0	1	1			2	med	0	0	0.633664	1	1
65	DTXSID00893979	Dipotassium hexafluorozirconate(2-)	16923-95-8	BJZIJOLEWHWTJO-UHFFFAOYSA-H	[K+].[K+].F[Zr--](F)(F)(F)(F)F		InChI=1S/6FH.2K.Zr/h6*1H;;;/q;;;;;;2*+1;+4/p-6_x000D_	F6K2Zr	283.411	16923958	16923-95-8	Dipotassium hexafluorozirconate(2-)	F6K2Zr	[K+].[K+].[F-][Zr+4]([F-])([F-])([F-])([F-])[F-]	canonical_smiles	0	0	0	0	0	0	0	1	1	0	0	0	0	0	0	1	0	0	0	1	1		inorganic	3	med	0	0	0.839256	1	1
66	DTXSID00894087	Bromkal 70	60371-14-4							60371144	60371-14-4	Bromkal 70				1	0	1	0	0	1	0	0	0	0	0	0	0	0	0	0	1	0	0	0	1	polyhalogenated diphenyl ethers		1	low	0	0	0	1	1
67	DTXSID00904130	2-Bromoallyl 2,4,6-tribromophenyl ether	99717-56-3	RLPZXGWCSHFKJI-UHFFFAOYSA-N	BrC(=C)COC1=C(Br)C=C(Br)C=C1Br	BrC(=C)COC1=C(Br)C=C(Br)C=C1Br	InChI=1S/C9H6Br4O/c1-5(10)4-14-9-7(12)2-6(11)3-8(9)13/h2-3H,1,4H2_x000D_	C9H6Br4O	449.762	99717563	99717-56-3	2-bromoallyl 2,4,6-tribromophenyl ethe	C9H6Br4O	BrC(=C)COC1=C(Br)C=C(Br)C=C1Br	qsar_ready_smiles	0	0	0	0	0	0	0	0	0	0	0	1	0	0	1	0	1	0	0	0	1	polyhalogenated phenol-aliphatic ether		2	med	0	0	0.864749	1	1
68	DTXSID00955980	Bis(2,3-dibromopropyl) hydrogen phosphate--ammonia (1/1)	34432-82-1	HUNCOJQSARNBJJ-UHFFFAOYSA-N	N.OP(=O)(OCC(Br)CBr)OCC(Br)CBr	OP(=O)(OCC(Br)CBr)OCC(Br)CBr	InChI=1/C6H11Br4O4P.H3N/c7-1-5(9)3-13-15(11,12)14-4-6(10)2-8;/h5-6H,1-4H2,(H,11,12);1H3_x000D_	C6H14Br4NO4P	514.771	34432821	34432-82-1	Bis(2,3-dibromopropyl) hydrogen phosphate--ammonia (1/1)	C6H14Br4NO4P	OP(=O)(OCC(Br)CBr)OCC(Br)CBr	qsar_ready_smiles	1	0	0	0	0	0	0	0	1	0	0	0	0	0	0	0	1	0	0	1	1	polyhalogenated organophosphates		1	low	0	0	0.972532	1	1
69	DTXSID00956119	Tetrakis(1-chloropropan-2-yl) ethane-1,2-diyl bis(phosphate)	34621-99-3	BUMSXEVUCFMUJR-UHFFFAOYSA-N	CC(CCl)OP(=O)(OCCOP(=O)(OC(C)CCl)OC(C)CCl)OC(C)CCl	CC(CCl)OP(=O)(OCCOP(=O)(OC(C)CCl)OC(C)CCl)OC(C)CCl	InChI=1/C14H28Cl4O8P2/c1-11(7-15)23-27(19,24-12(2)8-16)21-5-6-22-28(20,25-13(3)9-17)26-14(4)10-18/h11-14H,5-10H2,1-4H3_x000D_	C14H28Cl4O8P2	528.12	34621993	34621-99-3	Tetrakis(1-chloropropan-2-yl) ethane-1,2-diyl bis(phosphate)	C14H28Cl4O8P2	CC(CCl)OP(=O)(OCCOP(=O)(OC(C)CCl)OC(C)CCl)OC(C)CCl	qsar_ready_smiles	0	0	0	0	1	0	0	0	0	0	0	0	0	0	0	0	1	0	0	0	1	polyhalogenated organophosphates		1	low	0	0	0.938743	1	1
70	DTXSID00957040	Tris(2-bromo-4-methylphenyl) phosphate	35656-01-0	XVHSMXGREZXJKN-UHFFFAOYSA-N	CC1=CC(Br)=C(OP(=O)(OC2=C(Br)C=C(C)C=C2)OC2=C(Br)C=C(C)C=C2)C=C1	CC1=CC(Br)=C(OP(=O)(OC2=C(Br)C=C(C)C=C2)OC2=C(Br)C=C(C)C=C2)C=C1	InChI=1S/C21H18Br3O4P/c1-13-4-7-19(16(22)10-13)26-29(25,27-20-8-5-14(2)11-17(20)23)28-21-9-6-15(3)12-18(21)24/h4-12H,1-3H3_x000D_	C21H18Br3O4P	605.057	35656010	35656-01-0	Tris(2bromo4methylphenyl) phosphate	C21H18Br3O4P	CC1=CC(Br)=C(OP(=O)(OC2=C(Br)C=C(C)C=C2)OC2=C(Br)C=C(C)C=C2)C=C1	qsar_ready_smiles	0	0	0	0	0	0	0	0	0	0	0	0	0	0	1	0	1	0	0	0	1	polyhalogenated organophosphates		1	low	0	0	0.87775	1	1
71	DTXSID00959387	1,2,3,4,5-Pentabromo-6-(bromomethyl)benzene	38521-51-6	PYOIYKRKAHYOKO-UHFFFAOYSA-N	BrCC1=C(Br)C(Br)=C(Br)C(Br)=C1Br	BrCC1=C(Br)C(Br)=C(Br)C(Br)=C1Br	InChI=1S/C7H2Br6/c8-1-2-3(9)5(11)7(13)6(12)4(2)10/h1H2_x000D_	C7H2Br6	565.517	38521516	38521-51-6	1,2,3,4,5-Pentabromo-6-(bromomethyl)benzene	C7H2Br6	BrCC1=C(Br)C(Br)=C(Br)C(Br)=C1Br	qsar_ready_smiles	0	0	0	1	0	1	1	1	0	0	0	0	0	1	1	0	1	0	0	0	1	polyhalogenated benzene aliphatics and functionalized		6	high	1	0	0.961897	1	1
72	DTXSID00971221	Tetrakis(hydroxymethyl)phosphanium phosphate acetate (4/1/1)	55818-96-7	WPWUKAWNHCZFGG-UHFFFAOYSA-J	CC([O-])=O.[O-]P([O-])([O-])=O.OC[P+](CO)(CO)CO.OC[P+](CO)(CO)CO.OC[P+](CO)(CO)CO.OC[P+](CO)(CO)CO	OCP(CO)(CO)CO	InChI=1S/4C4H12O4P.C2H4O2.H3O4P/c4*5-1-9(2-6,3-7)4-8;1-2(3)4;1-5(2,3)4/h4*5-8H,1-4H2;1H3,(H,3,4);(H3,1,2,3,4)/q4*+1;;/p-4_x000D_	C18H51O22P5	774.453	55818967	55818-96-7	Tetrakis(hydroxymethyl)phosphanium phosphate acetate (4/1/1)	C18H51O22P5	OCP(CO)(CO)CO	qsar_ready_smiles	0	1	0	0	0	0	0	0	1	0	0	0	0	0	0	0	0	1	0	1	1			1	low	0	0	0.750605	1	1
73	DTXSID101000529	Tetrakis(hydroxymethyl)phosphanium naphthalene-2-sulfonate	79481-22-4	YOHQZPAZGCMWSN-UHFFFAOYSA-M	OC[P+](CO)(CO)CO.[O-]S(=O)(=O)C1=CC2=CC=CC=C2C=C1	OCP(CO)(CO)CO	InChI=1S/C10H8O3S.C4H12O4P/c11-14(12,13)10-6-5-8-3-1-2-4-9(8)7-10;5-1-9(2-6,3-7)4-8/h1-7H,(H,11,12,13);5-8H,1-4H2/q;+1/p-1_x000D_	C14H19O7PS	362.33	79481224	79481-22-4	Tetrakis(hydroxymethyl)phosphanium naphthalene-2-sulfonate	C14H19O7PS	OC[P+](CO)(CO)CO.[O-]S(=O)(=O)C1=CC2=CC=CC=C2C=C1	canonical_smiles	0	0	0	0	0	0	0	0	1	0	0	0	0	0	0	0	0	1	0	0	1			1	low	0	0	0.793611	1	1
74	DTXSID101014603	Crude natural boric acid	11113-50-1							11113501	11113-50-1	Crude natural boric acid		B(O)(O)O	pubchem_smiles	0	0	0	0	0	1	0	1	1	0	0	0	0	0	0	0	0	0	0	1	1		inorganic	3	med	0	0	0.821072	1	1
75	DTXSID101016697	Poly-(m-phenylene methylphosphonate)	63747-58-0							63747580	63747-58-0	Poly-(m-phenylene methylphosphonate)				0	0	0	0	1	1	0	0	0	0	0	0	0	0	0	0	0	1	0	0	1			2	med	0	0	0	1	1
76	DTXSID101016704	bis(2,3-dibromopropyl) 3,4,5,6-tetrabromobenzene-1,2-dicarboxylate	214216-08-7	GTKAGLSURYOSPN-UHFFFAOYSA-N	BrCC(Br)COC(=O)C1=C(C(=O)OCC(Br)CBr)C(Br)=C(Br)C(Br)=C1Br	BrCC(Br)COC(=O)C1=C(C(=O)OCC(Br)CBr)C(Br)=C(Br)C(Br)=C1Br	InChI=1/C14H10Br8O4/c15-1-5(17)3-25-13(23)7-8(14(24)26-4-6(18)2-16)10(20)12(22)11(21)9(7)19/h5-6H,1-4H2_x000D_	C14H10Br8O4	881.462	214216087	214216-08-7	bis(2,3-dibromopropyl) 3,4,5,6-tetrabromobenzene-1,2-dicarboxylate	C14H10Br8O4	BrCC(Br)COC(=O)C1=C(C(=O)OCC(Br)CBr)C(Br)=C(Br)C(Br)=C1Br	qsar_ready_smiles	0	0	0	0	1	0	0	0	0	0	0	0	0	0	0	0	1	0	0	0	1	polyhalogenated phthalates/benzoates/imides		1	low	0	0	0.956195	1	1
77	DTXSID101017114	Boric acid (H3BO3)​, compound with 1,​3,​5-​triazine-​2,​4,​6-​triamine	53587-44-3							53587443	53587-44-3	Boric acid (H3BO3)​, compound with 1,​3,​5-​triazine-​2,​4,​6-​triamine				0	0	0	0	0	1	0	1	0	0	0	0	0	0	0	0	0	1	0	1	1			2	med	0	0	0	1	1
78	DTXSID101018500	Alkanes, C20-24, chloro	2097144-45-9							2097144459	2097144-45-9	Alkanes, C20-24, chloro				1	0	0	0	1	0	0	0	0	0	0	0	0	0	0	0	1	0	0	0	1	polyhalogenated aliphatic chains		1	low	0	0	0	1	1
79	DTXSID10107312	1,3-Propanediamine, N1,N1'-1,2-ethanediylbis-, reaction products with cyclohexane and peroxidized N-butyl-2,2,6,6-tetramethyl-4-piperidinamine-2,4,6-trichloro-1,3,5-triazine reaction products	191680-81-6							191680816	191680-81-6	1,3-Propanediamine, N1,N1'-1,2-ethanediylbis-, reaction products with cyclohexane and peroxidized N-butyl-2,2,6,6-tetramethyl-4-piperidinamine-2,4,6-trichloro-1,3,5-triazine reaction products				0	0	0	1	1	1	0	0	0	0	0	0	0	0	0	0	0	0	1	0	1			3	med	0	0	0	1	1
80	DTXSID1020142	6-Phenyl-1,3,5-triazine-2,4-diamine	91-76-9	GZVHEAJQGPRDLQ-UHFFFAOYSA-N	NC1=NC(=NC(N)=N1)C1=CC=CC=C1	NC1=NC(=NC(N)=N1)C1=CC=CC=C1	InChI=1S/C9H9N5/c10-8-12-7(13-9(11)14-8)6-4-2-1-3-5-6/h1-5H,(H4,10,11,12,13,14)_x000D_	C9H9N5	187.206	91769	91-76-9	6-Phenyl-1,3,5-triazine-2,4-diamine	C9H9N5	NC1=NC(=NC(N)=N1)C1=CC=CC=C1	qsar_ready_smiles	0	0	0	0	0	0	0	0	0	0	0	0	0	0	1	0	0	1	0	0	1			1	low	0	0	0.767935	1	1
81	DTXSID10201783	Dibromodiphenyl ether	53563-56-7							53563567	53563-56-7	Diphenyl ether, dibromo-	C12H8Br2O			0	0	1	0	0	1	0	0	0	0	0	0	0	0	0	0	1	0	0	0	1	polyhalogenated diphenyl ethers		1	low	0	1	0	1	1
82	DTXSID1020194	Boric acid (H3BO3)	10043-35-3	KGBXLFKZBHKPEV-UHFFFAOYSA-N	OB(O)O		InChI=1S/BH3O3/c2-1(3)4/h2-4H_x000D_	BH3O3	61.83	10043353	10043-35-3	Boric acid (H3BO3)	BH3O3	OB(O)O	canonical_smiles	0	0	0	1	0	1	0	0	1	0	0	0	0	0	0	0	0	0	0	1	1			3	med	0	0	0.821072	1	1
83	DTXSID10208772	3,3',4,4',5,5'-Hexabromobiphenyl	60044-26-0	UXOOFXUEODCAIP-UHFFFAOYSA-N	BrC1=CC(=CC(Br)=C1Br)C1=CC(Br)=C(Br)C(Br)=C1	BrC1=CC(=CC(Br)=C1Br)C1=CC(Br)=C(Br)C(Br)=C1	InChI=1S/C12H4Br6/c13-7-1-5(2-8(14)11(7)17)6-3-9(15)12(18)10(16)4-6/h1-4H_x000D_	C12H4Br6	627.588	60044260	60044-26-0	3,3',4,4',5,5'-Hexabromobiphenyl	C12H4Br6	BrC1=CC(=CC(Br)=C1Br)C1=CC(Br)=C(Br)C(Br)=C1	qsar_ready_smiles	0	0	0	1	0	1	0	0	0	1	0	0	0	0	1	0	1	0	0	0	1	polyhalogenated benzenes		4	high	1	0	0.913138	1	1
84	DTXSID1021403	Trimethyl orthophosphate	512-56-1	WVLBCYQITXONBZ-UHFFFAOYSA-N	COP(=O)(OC)OC	COP(=O)(OC)OC	InChI=1S/C3H9O4P/c1-5-8(4,6-2)7-3/h1-3H3_x000D_	C3H9O4P	140.075	512561	512-56-1	Trimethyl phosphate	C3H9O4P	COP(=O)(OC)OC	qsar_ready_smiles	0	0	0	0	0	1	0	1	0	0	0	0	0	1	1	0	0	1	0	0	1			4	high	0	0	0.889698	1	1
85	DTXSID10218114	2,4,5,3',4'-Pentabromobiphenyl	67888-97-5	YOQVIFKWRYWBEP-UHFFFAOYSA-N	BrC1=CC(Br)=C(Br)C=C1C1=CC(Br)=C(Br)C=C1	BrC1=CC(Br)=C(Br)C=C1C1=CC(Br)=C(Br)C=C1	InChI=1S/C12H5Br5/c13-8-2-1-6(3-10(8)15)7-4-11(16)12(17)5-9(7)14/h1-5H_x000D_	C12H5Br5	548.692	67888975	67888-97-5	2,4,5,3',4'-Pentabromobiphenyl	C12H5Br5	BrC1=CC(Br)=C(Br)C=C1C1=CC(Br)=C(Br)C=C1	qsar_ready_smiles	0	0	0	0	0	1	0	0	1	0	0	0	0	0	0	0	1	0	0	0	1	polyhalogenated benzenes		2	med	0	1	0.924704	1	1
86	DTXSID1021952	Triphenyl phosphate	115-86-6	XZZNDPSIHUTMOC-UHFFFAOYSA-N	O=P(OC1=CC=CC=C1)(OC1=CC=CC=C1)OC1=CC=CC=C1	O=P(OC1=CC=CC=C1)(OC1=CC=CC=C1)OC1=CC=CC=C1	InChI=1S/C18H15O4P/c19-23(20-16-10-4-1-5-11-16,21-17-12-6-2-7-13-17)22-18-14-8-3-9-15-18/h1-15H_x000D_	C18H15O4P	326.288	115866	115-86-6	Triphenyl phosphate	C18H15O4P	O=P(OC1=CC=CC=C1)(OC1=CC=CC=C1)OC1=CC=CC=C1	qsar_ready_smiles	0	0	0	1	1	1	1	1	1	0	1	0	1	1	1	0	0	1	0	0	1		organic-non-halognated	10	high	0	0	0.907696	1	1
87	DTXSID10229705	Phosphonium, tetrakis(hydroxymethyl)-, 1-naphthalenesulfonate (salt)	79481-21-3	IKTWUMXQVVENPA-UHFFFAOYSA-M	OC[P+](CO)(CO)CO.[O-]S(=O)(=O)C1=CC=CC2=CC=CC=C12		InChI=1S/C10H8O3S.C4H12O4P/c11-14(12,13)10-7-3-5-8-4-1-2-6-9(8)10;5-1-9(2-6,3-7)4-8/h1-7H,(H,11,12,13);5-8H,1-4H2/q;+1/p-1_x000D_	C14H19O7PS	362.33	79481213	79481-21-3	Phosphonium, tetrakis(hydroxymethyl)-, 1-naphthalenesulfonate (salt)	C14H19O7PS	OC[P+](CO)(CO)CO.[O-]S(=O)(=O)C1=CC=CC2=CC=CC=C12	canonical_smiles	0	1	0	0	0	0	0	0	1	0	0	0	0	0	0	0	0	1	0	1	1			1	low	0	0	0.793611	1	1
88	DTXSID1024128	Hexabromobenzene	87-82-1	CAYGQBVSOZLICD-UHFFFAOYSA-N	BrC1=C(Br)C(Br)=C(Br)C(Br)=C1Br	BrC1=C(Br)C(Br)=C(Br)C(Br)=C1Br	InChI=1S/C6Br6/c7-1-2(8)4(10)6(12)5(11)3(1)9_x000D_	C6Br6	551.49	87821	87-82-1	Hexabromobenzene	C6Br6	BrC1=C(Br)C(Br)=C(Br)C(Br)=C1Br	qsar_ready_smiles	0	0	0	1	0	1	1	0	1	1	1	1	0	1	1	0	1	0	0	0	1	polyhalogenated benzenes	OFR	9	high	1	0	0.943529	1	1
89	DTXSID1024382	Phosphorus	7723-14-0	OAICVXFJPJFONN-UHFFFAOYSA-N	[P]		InChI=1S/P_x000D_	P	30.9738	7723140	7723-14-0	Phosphorus	P	[P]	canonical_smiles	0	0	0	0	1	1	0	0	1	0	0	0	0	0	0	1	0	0	0	1	1		Chemists note phosphorus exists as red, white, violet, black. Red phosphorus is most likely to be flame retardant while others are not.	4	high	0	0	0.490539	1	1
90	DTXSID1024627	1,2-Bis(2,4,6-tribromophenoxy)ethane	37853-59-1	YATIGPZCMOYEGE-UHFFFAOYSA-N	BrC1=CC(Br)=C(OCCOC2=C(Br)C=C(Br)C=C2Br)C(Br)=C1	BrC1=CC(Br)=C(OCCOC2=C(Br)C=C(Br)C=C2Br)C(Br)=C1	InChI=1S/C14H8Br6O2/c15-7-3-9(17)13(10(18)4-7)21-1-2-22-14-11(19)5-8(16)6-12(14)20/h3-6H,1-2H2_x000D_	C14H8Br6O2	687.64	37853591	37853-59-1	1,2-Bis(2,4,6-tribromophenoxy)ethane	C14H8Br6O2	BrC1=CC(Br)=C(OCCOC2=C(Br)C=C(Br)C=C2Br)C(Br)=C1	qsar_ready_smiles	0	0	0	1	1	1	1	0	1	1	1	1	1	1	1	1	1	0	0	0	1	polyhalogenated phenol-aliphatic ether	OFR	12	high	1	0	0.890716	1	1
91	DTXSID1025017	Dicumyl peroxide	80-43-3	XMNIXWIUMCBBBL-UHFFFAOYSA-N	CC(C)(OOC(C)(C)C1=CC=CC=C1)C1=CC=CC=C1	CC(C)(OOC(C)(C)C1=CC=CC=C1)C1=CC=CC=C1	InChI=1S/C18H22O2/c1-17(2,15-11-7-5-8-12-15)19-20-18(3,4)16-13-9-6-10-14-16/h5-14H,1-4H3_x000D_	C18H22O2	270.372	80433	80-43-3	Dicumyl peroxide	C18H22O2	CC(C)(OOC(C)(C)C1=CC=CC=C1)C1=CC=CC=C1	qsar_ready_smiles	0	0	0	0	0	0	0	0	0	0	1	0	0	0	0	1	0	1	0	0	1			2	med	0	0	0.595482	1	1
92	DTXSID1025300	2-Ethylhexyl diphenyl phosphate	1241-94-7	CGSLYBDCEGBZCG-UHFFFAOYSA-N	CCCCC(CC)COP(=O)(OC1=CC=CC=C1)OC1=CC=CC=C1	CCCCC(CC)COP(=O)(OC1=CC=CC=C1)OC1=CC=CC=C1	InChI=1/C20H27O4P/c1-3-5-12-18(4-2)17-22-25(21,23-19-13-8-6-9-14-19)24-20-15-10-7-11-16-20/h6-11,13-16,18H,3-5,12,17H2,1-2H3_x000D_	C20H27O4P	362.406	1241947	1241-94-7	2-Ethylhexyl diphenyl phosphate	C20H27O4P	CCCCC(CC)COP(=O)(OC1=CC=CC=C1)OC1=CC=CC=C1	qsar_ready_smiles	0	0	0	1	0	1	0	1	1	0	1	0	0	0	1	0	0	1	0	0	1		organic-non-halognated	6	high	0	0	0.940754	1	1
93	DTXSID1026081	3,3',5,5'-Tetrabromobisphenol A	79-94-7	VEORPZCZECFIRK-UHFFFAOYSA-N	CC(C)(C1=CC(Br)=C(O)C(Br)=C1)C1=CC(Br)=C(O)C(Br)=C1	CC(C)(C1=CC(Br)=C(O)C(Br)=C1)C1=CC(Br)=C(O)C(Br)=C1	InChI=1S/C15H12Br4O2/c1-15(2,7-3-9(16)13(20)10(17)4-7)8-5-11(18)14(21)12(19)6-8/h3-6,20-21H,1-2H3_x000D_	C15H12Br4O2	543.875	79947	79-94-7	3,3',5,5'-Tetrabromobisphenol A	C15H12Br4O2	CC(C)(C1=CC(Br)=C(O)C(Br)=C1)C1=CC(Br)=C(O)C(Br)=C1	qsar_ready_smiles	0	0	0	1	1	1	1	1	1	1	1	1	1	1	1	1	1	0	0	0	1	polyhalogenated bisphenol aliphatics and functionalized	OFR, old CAS number is 30496130 and was deleted, recommend use 79947	13	high	1	0	0.832179	1	1
94	DTXSID1026083	1,1,2,2-Tetrabromoethane	79-27-6	QXSZNDIIPUOQMB-UHFFFAOYSA-N	BrC(Br)C(Br)Br	BrC(Br)C(Br)Br	InChI=1S/C2H2Br4/c3-1(4)2(5)6/h1-2H_x000D_	C2H2Br4	345.654	79276	79-27-6	1,1,2,2-Tetrabromoethane	C2H2Br4	BrC(Br)C(Br)Br	qsar_ready_smiles	0	0	0	1	0	0	0	1	0	0	0	0	0	0	0	0	1	0	0	0	1	polyhalogenated aliphatic chains		2	med	1	0	0.695863	1	1
95	DTXSID1027134	Bis(2-ethylhexyl) phosphate	298-07-7	SEGLCEQVOFDUPX-UHFFFAOYSA-N	CCCCC(CC)COP(O)(=O)OCC(CC)CCCC	CCCCC(CC)COP(O)(=O)OCC(CC)CCCC	InChI=1/C16H35O4P/c1-5-9-11-15(7-3)13-19-21(17,18)20-14-16(8-4)12-10-6-2/h15-16H,5-14H2,1-4H3,(H,17,18)_x000D_	C16H35O4P	322.426	298077	298-07-7	Bis(2-ethylhexyl) phosphate	C16H35O4P	CCCCC(CC)COP(O)(=O)OCC(CC)CCCC	qsar_ready_smiles	0	0	0	0	0	0	0	1	0	0	0	0	1	0	1	0	0	1	0	0	1		non-halognated organic	3	med	0	0	0.916064	1	1
96	DTXSID10274134	Tris(3,5-xylenyl)phosphate	25653-16-1	LLPMAOBOEQFPRE-UHFFFAOYSA-N	CC1=CC(OP(=O)(OC2=CC(C)=CC(C)=C2)OC2=CC(C)=CC(C)=C2)=CC(C)=C1	CC1=CC(OP(=O)(OC2=CC(C)=CC(C)=C2)OC2=CC(C)=CC(C)=C2)=CC(C)=C1	InChI=1S/C24H27O4P/c1-16-7-17(2)11-22(10-16)26-29(25,27-23-12-18(3)8-19(4)13-23)28-24-14-20(5)9-21(6)15-24/h7-15H,1-6H3_x000D_	C24H27O4P	410.45	25653161	25653-16-1	Tris(3,5-xylenyl)phosphate	C24H27O4P	CC1=CC(OP(=O)(OC2=CC(C)=CC(C)=C2)OC2=CC(C)=CC(C)=C2)=CC(C)=C1	qsar_ready_smiles	0	0	0	0	0	1	0	0	0	0	0	0	0	0	1	0	0	1	0	0	1			2	med	0	0	0.876725	1	1
97	DTXSID1029049	Tetrabromophthalic acid mixed esters with diethylene glycol and propylene glycol	77098-07-8							77098078	77098-07-8	Tetrabromophthalic acid mixed esters with diethylene glycol and propylene glycol				1	0	0	1	1	1	1	0	1	0	0	0	1	0	1	0	0	0	0	0	1			7	high	0	0	0	1	1
98	DTXSID1029095	Phosphoric acid, mixed 3-bromo-2,2-dimethylpropyl and 2-bromoethyl and 2-chloroethyl esters	125997-20-8		[*]OP(=O)(O[*])O[*] |$_R1;;;;;_R1;;_R1$,lp:1:2,3:2,4:2,6:2,RG:_R1={CC(C)(CBr)C* |$;;;;;;_AP1$,lp:4:3|},{BrCC* |$;;;_AP1$,lp:0:3|},{ClCC* |$;;;_AP1$,lp:0:3|}|			O4P	94.97	125997208	125997-20-8	Phosphoric acid, mixed 3-bromo-2,2-dimethylpropyl and 2-bromoethyl and 2-chloroethyl esters	C9H18Br2ClO4P			1	0	0	0	1	0	0	1	1	0	0	0	0	0	1	0	1	0	0	0	1	polyhalogenated organophosphates		4	high	0	1	0	1	1
99	DTXSID1029677	Silica	7631-86-9	VYPSYNLAJGMNEJ-UHFFFAOYSA-N	O=[Si]=O		InChI=1S/O2Si/c1-3-2_x000D_	O2Si	60.083	7631869	7631-86-9	Silica		O=[Si]=O	canonical_smiles	0	0	0	0	1	1	0	0	0	0	0	0	0	0	0	0	0	1	0	1	1			2	med	0	0	0.732893	1	1
100	DTXSID1029704	Ammonium sulfate	7783-20-2	BFNBIHQBYMNNAN-UHFFFAOYSA-N	[NH4+].[NH4+].[O-]S([O-])(=O)=O		InChI=1S/2H3N.H2O4S/c;;1-5(2,3)4/h2*1H3;(H2,1,2,3,4)_x000D_	H8N2O4S	132.13	7783202	7783-20-2	Ammonium sulfate	H8N2O4S	[NH4+].[NH4+].[O-]S([O-])(=O)=O	canonical_smiles	0	0	0	0	0	1	0	1	1	0	0	0	0	0	0	0	0	0	0	1	1		inorganic	3	med	0	0	0.74215	1	1
101	DTXSID1033325	Chlorinated paraffins	63449-39-8							63449398	63449-39-8	Chlorinated paraffins		CCCC(CCCC(CCC(CCC(CCC(CCCC(CCC)Cl)Cl)Cl)Cl)Cl)Cl	pubchem_smiles	0	0	0	1	1	1	0	1	1	1	1	0	0	0	0	1	1	0	0	0	1	polyhalogenated aliphatic chains	Data sources 4 and 7 also reported old generic CAS 51990126_x000D_ Rolled into this CAS 63449398	8	high	1	0	0.629383	1	1
102	DTXSID1034347	Barium metaborate	13701-59-2	QBLDFAIABQKINO-UHFFFAOYSA-N	[Ba++].[O-]B=O.[O-]B=O		InChI=1S/2BO2.Ba/c2*2-1-3;/q2*-1;+2_x000D_	B2BaO4	222.94	13701592	13701-59-2	Barium metaborate	B2BaO4	[Ba++].[O-]B=O.[O-]B=O	canonical_smiles	0	0	0	0	0	0	0	1	1	0	0	0	0	0	0	1	0	0	0	1	1		inorganic	3	med	0	0	0.932614	1	1
103	DTXSID1034391	Disodium octaborate tetrahydrate	12280-03-4	RDMZIKMKSGCBKK-UHFFFAOYSA-N	O.O.O.O.[Na+].[Na+].[O-]B1OB([O-])OB2OB(OB=O)OB(OB=O)OB(O1)O2		InChI=1S/B8O13.2Na.4H2O/c9-1-13-5-18-6(14-2-10)20-8-17-4(12)15-3(11)16-7(19-5)21-8;;;;;;/h;;;4*1H2/q-2;2*+1;;;;_x000D_	B8H8Na2O17	412.51	12280034	12280-03-4	Disodium octaborate tetrahydrate	B8H8Na2O17	O.O.O.O.[Na+].[Na+].[O-]B1OB([O-])OB2OB(OB=O)OB(OB=O)OB(O1)O2	canonical_smiles	0	0	0	0	0	1	0	1	0	0	0	0	0	0	0	0	0	0	0	1	1			2	med	0	0	0.932614	1	1
104	DTXSID1044699	Diethyl hydrogen phosphate	598-02-7	UCQFCFPECQILOL-UHFFFAOYSA-N	CCOP(O)(=O)OCC	CCOP(O)(=O)OCC	InChI=1S/C4H11O4P/c1-3-7-9(5,6)8-4-2/h3-4H2,1-2H3,(H,5,6)_x000D_	C4H11O4P	154.102	598027	598-02-7	Diethyl hydrogen phosphate	C4H11O4P	CCOP(O)(=O)OCC	qsar_ready_smiles	0	0	0	0	0	1	0	0	0	0	0	0	0	0	1	0	0	1	0	0	1		non-halognated organic	2	med	0	0	0.863718	1	1
105	DTXSID1048207	Diphenyl phosphate	838-85-7	ASMQGLCHMVWBQR-UHFFFAOYSA-N	OP(=O)(OC1=CC=CC=C1)OC1=CC=CC=C1	OP(=O)(OC1=CC=CC=C1)OC1=CC=CC=C1	InChI=1S/C12H11O4P/c13-17(14,15-11-7-3-1-4-8-11)16-12-9-5-2-6-10-12/h1-10H,(H,13,14)_x000D_	C12H11O4P	250.19	838857	838-85-7	Diphenyl phosphate	C12H11O4P	OP(=O)(OC1=CC=CC=C1)OC1=CC=CC=C1	qsar_ready_smiles	0	0	0	0	0	0	0	0	0	0	0	0	0	0	1	0	0	1	0	0	1			1	low	0	0	0.906906	1	1
106	DTXSID1051802	Dibutyl chlorendate	1770-80-5	UJAHPBDUQZFDLA-UHFFFAOYSA-N	CCCCOC(=O)C1C(C(=O)OCCCC)C2(Cl)C(Cl)=C(Cl)C1(Cl)C2(Cl)Cl	CCCCOC(=O)C1C(C(=O)OCCCC)C2(Cl)C(Cl)=C(Cl)C1(Cl)C2(Cl)Cl	InChI=1/C17H20Cl6O4/c1-3-5-7-26-13(24)9-10(14(25)27-8-6-4-2)16(21)12(19)11(18)15(9,20)17(16,22)23/h9-10H,3-8H2,1-2H3_x000D_	C17H20Cl6O4	501.04	1770805	1770-80-5	Dibutyl chlorendate	C17H20Cl6O4	CCCCOC(=O)C1C(C(=O)OCCCC)C2(Cl)C(Cl)=C(Cl)C1(Cl)C2(Cl)Cl	qsar_ready_smiles	0	0	0	1	0	0	0	0	1	0	0	0	0	0	1	0	1	0	0	0	1	polyhalogenated carbocycles		3	med	1	0	0.828717	1	1
107	DTXSID1052290	2,4-Dibromophenol	615-58-7	FAXWFCTVSHEODL-UHFFFAOYSA-N	OC1=C(Br)C=C(Br)C=C1	OC1=C(Br)C=C(Br)C=C1	InChI=1S/C6H4Br2O/c7-4-1-2-6(9)5(8)3-4/h1-3,9H_x000D_	C6H4Br2O	251.905	615587	615-58-7	2,4-Dibromophenol	C6H4Br2O	OC1=C(Br)C=C(Br)C=C1	qsar_ready_smiles	0	0	0	1	0	1	1	1	1	1	1	1	0	1	1	1	1	0	0	0	1	polyhalogenated phenol derivatives	OFR	11	high	1	0	0.76491	1	1
108	DTXSID1052531	Calcium phosphinate	7789-79-9	LITFOGPYONJRNO-UHFFFAOYSA-L	[Ca++].[O-]P=O.[O-]P=O		InChI=1S/Ca.2HO2P/c;2*1-3-2/h;2*(H,1,2)/q+2;;/p-2_x000D_	CaO4P2	166.022	7789799	7789-79-9	Calcium phosphinate	CaO4P2	[Ca++].[O-]P=O.[O-]P=O	canonical_smiles	0	0	0	0	0	1	0	0	0	0	1	0	0	0	0	0	0	0	0	1	1			2	med	0	0	0.851631	1	1
[truncated: 638 more rows]

## Sheet: 4_Single_Org_FR
COUNT	DTXSID	PREFERRED_NAME	CASRN	MOLECULAR_FORMULA	AVERAGE_MASS	INCHIKEY	INCHI_STRING	CT_SMILES	CT_QSAR_READY_SMILES	is_iofr	is_ndiscrete_with_CX	is_ndiscrete_without_CX	is_ohfr	is_onhfr	is_polyfr	is_fr	nas_ofr_category	comments_integrated	nas_report	In_CompTox
[truncated: 600 more rows]

## Sheet: 5_Master_QSARr
COUNT	DTXSID	PREFERRED_NAME	CASRN	MOLECULAR_FORMULA	AVERAGE_MASS	INCHIKEY	INCHI_STRING	CT_SMILES	is_iofr	is_ndiscrete_with_CX	is_ndiscrete_without_CX	is_ohfr	is_onhfr	is_polyfr	is_fr	nas_ofr_category	comments_integrated	nas_report	In_CompTox	CompTox_QSARr_SMILES	Bevington_QSARr_SMILES	KNIME_QSARr_SMILES	Master_QSARr
[truncated: 600 more rows]

[truncated: 12 more sheets: 6_NoBlanks, 7_DedupQSARr, 8_Deduped_References, 9_Metab_Class_Link, 10_MetabArossClassCount, 11_ParentClassColors, 12_HMDB, 13_GxRxns, 14_BT_Rxns, 15_SwissADME_Metabs, 16_Metabs_also_FRs, Pivot Table]
